# Supplementary material for: Mechanistic studies on nickel-catalyzed enantioselective [3 + 2] annulation for γ-butenolide synthesis via C–C activation of diarylcyclopropenones
Source: Royal Society of Chemistry journal article supplement (doi:10.1039/d1qo00322d), 2021-01-01
Supplement: d1qo00322d1.pdf [file d1qo00322d1.pdf]

## **Mechanistic Studies on Nickel-Catalyzed Enantioselective [3+2] Annulation via Intermolecular C-C Activation of Cyclopropenones**

Dachang Bai,\*<sup>1,4</sup> Song Liu,<sup>2,5</sup> Junyan Chen,<sup>1</sup> Yanjiang Yu,<sup>1</sup> Manman Wang,<sup>1</sup> Junbiao Chang,<sup>1</sup> Yu Lan,\*<sup>2</sup>  
Xingwei Li \*<sup>1,3</sup>

<sup>1</sup> Henan Key Laboratory of Organic Functional Molecule and Drug Innovation, Collaborative Innovation Center of Henan Province for Green Manufacturing of Fine Chemicals, Key Laboratory of Green Chemical Media and Reactions, Ministry of Education, School of Chemistry and Chemical Engineering, Henan Normal University, Xixiang 453007, China

<sup>2</sup> China School of Chemistry and Chemical Engineering, and Chongqing Key Laboratory of Theoretical and Computational Chemistry, Chongqing University, Chongqing 400030, China

<sup>3</sup> School of Chemistry and Chemical Engineering, Shaanxi Normal University (SNNU), Xi'an 710062, China

<sup>4</sup> State Key Laboratory of Organometallic Chemistry, Shanghai Institute of Organic Chemistry, Chinese Academy of Sciences, Shanghai 200032, P R China

<sup>5</sup> Chongqing Key Laboratory of Environmental Materials and Remediation Technologies, Chongqing University of Arts and Sciences, Chongqing, 402160, P. R. China.

E-mail: baidachang@htu.edu.cn, lanyu@cqu.edu.cn, lixw@snnu.edu.cn

# Table of Contents

|                                                            |          |
|------------------------------------------------------------|----------|
| 1. General Information.....                                | S2       |
| 2. Coupling of Cyclopropanones with Enones or Diones ..... | S2-S5    |
| 3. General procedure and Characterization .....            | S6-S15   |
| 4. TOF Studies.....                                        | S16-S17  |
| 5. Mechanic Studies .....                                  | S18-S35  |
| 6. X-Ray Crystallographic Data .....                       | S36-S38  |
| 7. DFT Mechanistic Studies.....                            | S39-S77  |
| 8. References .....                                        | S78      |
| 9. NMR Spectra and HPLC Spectra.....                       | S79-S155 |

## 1, General Information

All chemicals were obtained from commercial sources and were used as received unless otherwise noted. All the reactions were carried out in an argon-filled glove box. The  $^1\text{H}$  NMR spectra were recorded on a 400 MHz or 600 MHz NMR spectrometer. The  $^{13}\text{C}$  NMR spectra were recorded at 100 MHz or 150 MHz. The  $^{19}\text{F}$  NMR spectra were recorded at 565 MHz. Chemical shifts were expressed in parts per million( $\delta$ ) downfield from the internal standard tetramethylsilane, and were reported as s (singlet), d (doublet), t (triplet), dd (doublet of doublet), dt (doublet of triplet), m (multiplet), br s (broad singlet), etc. The residual solvent signals were used as references and the chemical shifts were converted to the TMS scale. High resolution mass spectra were obtained on an Agilent Q-TOF 6540 spectrometer. Column chromatography was performed on silica gel (300-400 mesh). Thin layer chromatography was performed on pre-coated glassbacked plates and visualized under UV light at 254 nm. Flash column chromatography was performed on silica gel. 1, 2-diones were purchased from commercial sources. Ligands **L1-L9** were prepared by following a literature procedure.<sup>1</sup> Cyclopropenones<sup>2</sup> and  $\alpha$ ,  $\beta$ -unsaturated ketones<sup>3</sup> were prepared according to literature reports.

## 2, Coupling of Cyclopropenones with Enones or Diones

### 2.1 Table S1. The coupling of diphenylcyclopropenone **1a** and enone **2a** with Ni/L1 catalyst.<sup>[a]</sup>

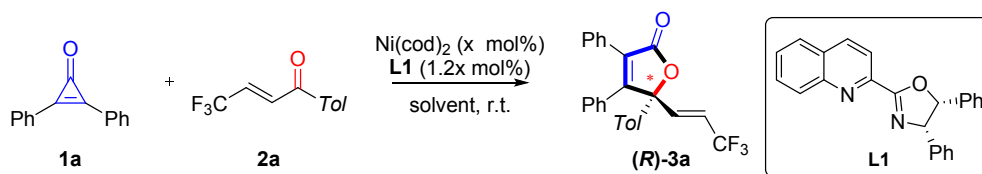

| entry                 | Catalyst (x mol %) | Solvent           | Time  | yield(%) | ee (%) | TOF (h <sup>-1</sup> ) |
|-----------------------|--------------------|-------------------|-------|----------|--------|------------------------|
| <b>1</b>              | 1.0                | Toluene           | 5 min | 99       | 95     | 1188                   |
| <b>2</b>              | 0.5                | Toluene           | 5 min | 51       | 95     | 1224                   |
| <b>3</b>              | 0.5                | Dioxane           | 5 min | 16       | 91     | 384                    |
| <b>4</b>              | 0.5                | MeO'Bu            | 5 min | 92       | 93     | 2208                   |
| <b>5</b>              | 0.5                | THF               | 5 min | 10       | --     | --                     |
| <b>6</b>              | 0.5                | PhCl              | 5 min | 0        | --     | --                     |
| <b>7</b>              | 0.5                | PhCF <sub>3</sub> | 5 min | 0        | --     | --                     |
| <b>8<sup>b</sup></b>  | 5.0                | MeO'Bu            | 3 h   | SM       | --     | --                     |
| <b>9<sup>c</sup></b>  | 5.0                | MeO'Bu            | 5 min | 96       | 93     | --                     |
| <b>10<sup>d</sup></b> | 5.0                | MeO'Bu            | 3 h   | 72       | --     | --                     |

<sup>[a]</sup> Reaction conditions: **1a** (0.2 mmol), enone **2a** (0.2 mmol),  $\text{Ni}(\text{cod})_2$  (0.01 mmol) and chiral ligand (0.012 mmol) in solvent (2.0 mL) under Ar, isolated yield. The ee was determined by HPLC on a chiral stationary phase. <sup>[b]</sup> under O<sub>2</sub>. <sup>[c]</sup>

10 eq H<sub>2</sub>O was added. <sup>[d]</sup> PPh<sub>3</sub> was used as ligand instead of **L1**.

**Table S2.** Optimization Studies of Annulation of **1a** with  $\alpha$ -Trifluoromethylated enone. <sup>a</sup>

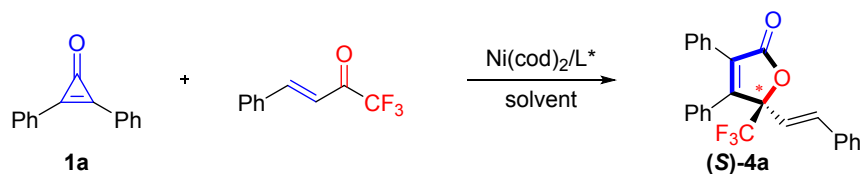

| Entry | Catalyst (mol %)         | L* (mol %)    | Solvent             | T (°C) | Yield (%) | ee (%) |
|-------|--------------------------|---------------|---------------------|--------|-----------|--------|
| 1     | Ni(cod) <sub>2</sub> (5) | <b>L1</b> (6) | toluene             | r.t.   | 50        | -98    |
| 2     | Ni(cod) <sub>2</sub> (5) | <b>L2</b> (6) | toluene             | r.t.   | 55        | 99     |
| 3     | Ni(cod) <sub>2</sub> (5) | <b>L4</b> (6) | toluene             | r.t.   | 50        | -97    |
| 4     | Ni(cod) <sub>2</sub> (5) | <b>L6</b> (6) | toluene             | r.t.   | 11        | -36    |
| 5     | Ni(cod) <sub>2</sub> (5) | <b>L7</b> (6) | toluene             | r.t.   | 44        | -98    |
| 6     | Ni(cod) <sub>2</sub> (5) | <b>L2</b> (6) | toluene             | 100    | 43        | 99     |
| 7     | Ni(cod) <sub>2</sub> (5) | <b>L2</b> (6) | dioxane             | r.t.   | 63        | 99     |
| 8     | Ni(cod) <sub>2</sub> (5) | <b>L2</b> (6) | PhCl                | r.t.   | 52        | 99     |
| 9     | Ni(cod) <sub>2</sub> (5) | <b>L2</b> (6) | PhCF <sub>3</sub>   | r.t.   | 50        | 98     |
| 10    | Ni(cod) <sub>2</sub> (5) | <b>L2</b> (6) | DCE                 | r.t.   | --        | --     |
| 11    | Ni(cod) <sub>2</sub> (5) | <b>L2</b> (6) | EtOH                | r.t.   | 57        | 98     |
| 12    | Ni(cod) <sub>2</sub> (5) | <b>L2</b> (6) | DMA                 | r.t.   | 77        | 98     |
| 13    | Ni(cod) <sub>2</sub> (5) | <b>L2</b> (6) | MeO <sup>t</sup> Bu | r.t.   | 82        | 98     |
| 14    | Ni(cod) <sub>2</sub> (5) | <b>L2</b> (6) | acetone             | r.t.   | 66        | 98     |
| 15    | Ni(cod) <sub>2</sub> (5) | <b>L2</b> (6) | THF                 | r.t.   | 59        | 92     |
| 16    | --                       | <b>L2</b> (6) | MeO <sup>t</sup> Bu | r.t.   | --        | --     |

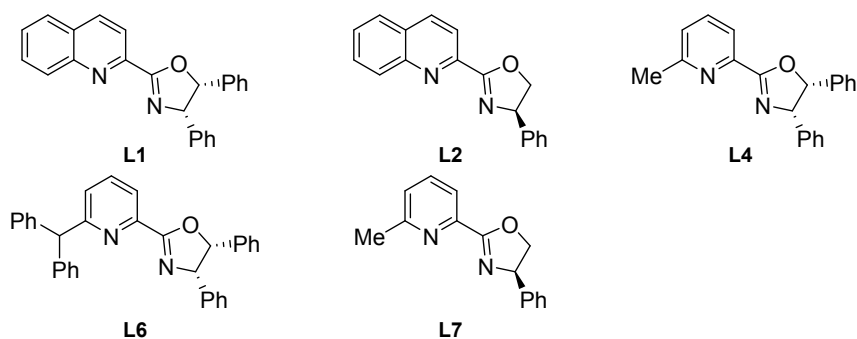

<sup>a</sup>Reaction conditions: **1** (0.20 mmol), **enone** (0.20 mmol), Ni(cod)<sub>2</sub> (0.01 mmol), **L\*** (0.012 mmol), solvent (2.0 mL), 24 h under argon.

**Table S3.** Optimization Studies of Annulation of **1a** with 1, 2-dione.<sup>a</sup>

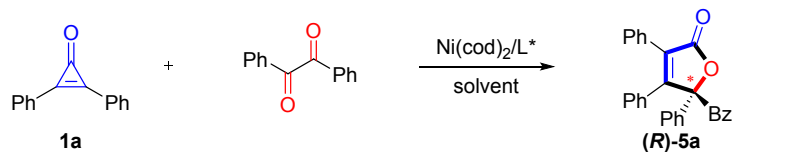

| Entry | Catalyst (mol %)         | L* (mol %)    | Solvent             | T (°C) | Yield (%) | ee (%) |
|-------|--------------------------|---------------|---------------------|--------|-----------|--------|
| 1     | Ni(cod) <sub>2</sub> (5) | <b>L1</b> (6) | toluene             | 60     | 46        | 65     |
| 2     | Ni(cod) <sub>2</sub> (5) | <b>L1</b> (6) | <i>i</i> PrOH       | 60     | 21        | 0      |
| 3     | Ni(cod) <sub>2</sub> (5) | <b>L1</b> (6) | dioxane             | 60     | 43        | 53     |
| 4     | Ni(cod) <sub>2</sub> (5) | <b>L1</b> (6) | THF                 | 60     | 47        | 58     |
| 5     | Ni(cod) <sub>2</sub> (5) | <b>L1</b> (6) | DCE                 | 60     | trace     | --     |
| 6     | Ni(cod) <sub>2</sub> (5) | <b>L1</b> (6) | PhCl                | 60     | 44        | 54     |
| 7     | Ni(cod) <sub>2</sub> (5) | <b>L1</b> (6) | PhCF <sub>3</sub>   | 60     | 22        | 42     |
| 8     | Ni(cod) <sub>2</sub> (5) | <b>L1</b> (6) | PhOMe               | 60     | 32        | 54     |
| 9     | Ni(cod) <sub>2</sub> (5) | <b>L1</b> (6) | toluene             | r.t.   | 41        | 66     |
| 10    | Ni(cod) <sub>2</sub> (5) | <b>L2</b> (6) | toluene             | r.t.   | 44        | -41    |
| 11    | Ni(cod) <sub>2</sub> (5) | <b>L3</b> (6) | toluene             | r.t.   | 48        | 42     |
| 12    | Ni(cod) <sub>2</sub> (5) | <b>L4</b> (6) | toluene             | r.t.   | 49        | 76     |
| 13    | Ni(cod) <sub>2</sub> (5) | <b>L5</b> (6) | toluene             | r.t.   | 85        | 45     |
| 14    | Ni(cod) <sub>2</sub> (5) | <b>L6</b> (6) | toluene             | r.t.   | 77        | 80     |
| 15    | Ni(cod) <sub>2</sub> (5) | <b>L6</b> (6) | toluene             | 0      | 76        | 90     |
| 16    | Ni(cod) <sub>2</sub> (5) | <b>L7</b> (6) | toluene             | 0      | 38        | 72     |
| 17    | Ni(cod) <sub>2</sub> (5) | <b>L8</b> (6) | toluene             | 0      | 27        | 20     |
| 18    | Ni(cod) <sub>2</sub> (5) | <b>L9</b> (6) | toluene             | 0      | 16        | 4      |
| 19    | Ni(cod) <sub>2</sub> (5) | <b>L6</b> (6) | toluene             | -20    | 21        | 93     |
| 20    | Ni(cod) <sub>2</sub> (5) | <b>L6</b> (6) | dioxane             | 12     | 95        | 86     |
| 21    | Ni(cod) <sub>2</sub> (5) | <b>L6</b> (6) | THF                 | 0      | 71        | 77     |
| 22    | Ni(cod) <sub>2</sub> (5) | <b>L6</b> (6) | MeO <sup>t</sup> Bu | 0      | 18        | 88     |
| 23    | Ni(cod) <sub>2</sub> (5) | <b>L6</b> (6) | PhOPh               | 0      | 66        | 84     |
| 24    | Ni(cod) <sub>2</sub> (5) | <b>L6</b> (6) | 2-MeTHF             | 0      | 47        | 86     |
| 25    | Ni(cod) <sub>2</sub> (5) | <b>L6</b> (6) | Tol:dioxane<br>1:1  | 0      | 67        | 92     |

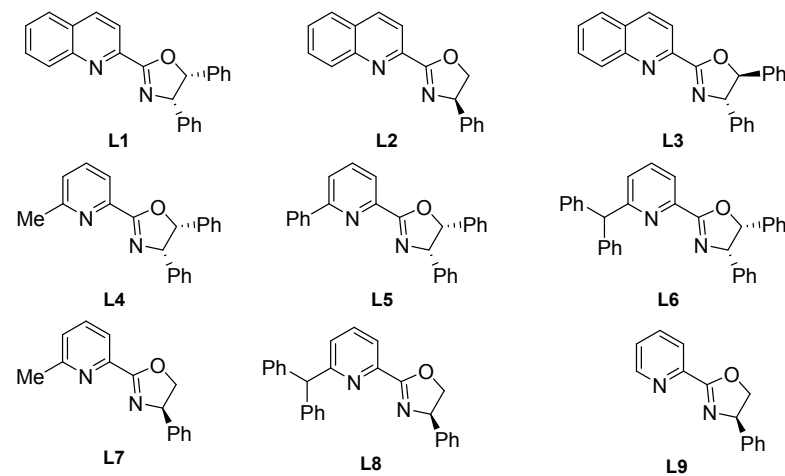

<sup>a</sup>Reaction conditions: **1** (0.20 mmol), **benzil** (0.20 mmol), Ni(cod)<sub>2</sub> (0.01 mmol), L\* (0.012 mmol), solvent (2.0 mL), 24 h under argon.

### 3. General Synthetic Procedures

General procedure **A**: Ni(cod)<sub>2</sub> (2.75 mg, 0.01 mmol) and **L2** (4.2 mg, 0.012 mmol) in MeO<sup>t</sup>Bu (2.0 mL) were charged into a pressure tube under argon. The mixture was stirred for 10 min at room temperature, followed by addition of a cyclopropenone (0.200 mmol, 1.0 equiv) and  $\alpha$ -CF<sub>3</sub> enone (0.200 mmol, 1.0 equiv). The reaction tube was then sealed and placed into an oil bath at room temperature. After reaction for 24 h, the reaction mixture was filtered through a pad of celite. The mixture was eluted with ethyl acetate, concentrated, and purified by silica gel chromatography (PE:EA = 10:1) to give the indicated product.

General procedure **B**: Ni(cod)<sub>2</sub> (2.75 mg, 0.01 mmol) and **L6** (5.6 mg, 0.012 mmol) in toluene (2.0 mL) were charged into a 25 mL pressure tube under argon. The mixture was stirred for 10 min at room temperature, followed by addition of a cyclopropenone (0.20 mmol, 1.0 equiv) and 1, 2-dione (0.20 mmol, 1.0 equiv). The reaction tube was then sealed and placed into an oil bath at 0 °C. After reaction for 24 h, the reaction mixture was filtered through a pad of celite. The mixture was eluted with ethyl acetate, concentrated, and purified by silica gel chromatography (PE:EA = 10:1) to give the indicated product.

General procedure **C**: Ni(cod)<sub>2</sub> (2.75 mg, 0.01 mmol) and **L6** (5.6 mg, 0.012 mmol) in dioxane (2.0 mL) were charged into a 25 mL pressure tube under argon. The mixture was stirred for 10 min at room temperature, followed by addition of a cyclopropenone (0.200 mmol, 1.0 equiv) and 1, 2-dione (0.200 mmol, 1.0 equiv). The reaction tube was then sealed and placed in an oil bath 12 °C for 24 h. The reaction mixture was filtered through a pad of celite, eluted with ethyl acetate, concentrated, and purified by silica gel chromatography (PE:EA = 10:1) to give the indicated product.

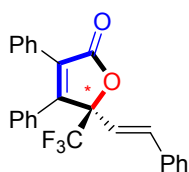

**4a**, General procedure **A**, white solid, mp: 118~120 °C. 65.8 mg (82% yield). ee: 98%, HPLC analysis on a Chiralcel OD-H column (hexane/isopropanol = 99/1, flow rate 1.0 mL/min):  $t_R$  = 6.9 min (major),  $t_R$  = 8.6 min (minor).  $[\alpha]_D^{26}$  = 4.8 (c 0.9, CH<sub>2</sub>Cl<sub>2</sub>). <sup>1</sup>H NMR (400 MHz, CDCl<sub>3</sub>)  $\delta$  7.39 – 7.32 (m, 5H), 7.32 – 7.22 (m, 5H), 7.22 – 7.12 (m, 5H), 7.07 (d,  $J$  = 16.0 Hz, 1H), 6.34 (d,  $J$  = 16.0 Hz, 1H). <sup>13</sup>C NMR (101 MHz, CDCl<sub>3</sub>)  $\delta$  169.9, 157.1, 135.4, 135.0, 130.8, 129.9, 129.5, 129.4, 129.3, 129.2, 129.0, 128.5, 128.5, 128.4, 127.3, 122.8 (q,  $J$  = 285.9 Hz), 116.7, 86.2 (q,  $J$  = 30.8 Hz). <sup>19</sup>F NMR (376







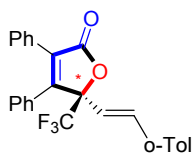

**4g**, General procedure **A**, yellow oil. 73.2 mg (87% yield). ee: 96%, HPLC analysis on a Chiralcel AS-H column (hexane/isopropanol = 95/5, flow rate 0.8 mL/min):  $t_R = 7.0$  min (major),  $t_R = 8.6$  min (minor).  $[\alpha]_D^{26} = 18.7$  (c 1.1,  $\text{CH}_2\text{Cl}_2$ ).  $^1\text{H}$  NMR (400 MHz,  $\text{CDCl}_3$ )  $\delta$  7.38 – 7.33 (m, 4H), 7.32 – 7.27 (m, 3H), 7.21 – 7.16 (m, 5H), 7.15 – 7.09 (m, 3H), 6.23 (d,  $J = 15.9$  Hz, 1H), 2.29 (s, 3H).  $^{13}\text{C}$  NMR (151 MHz,  $\text{CDCl}_3$ )  $\delta$  169.9, 157.0, 136.7, 134.3, 133.6, 130.8, 130.8, 129.9, 129.6, 129.5, 129.4, 129.2, 129.2, 128.6, 128.5, 128.5, 126.5, 126.1, 122.8 (q,  $J = 286.2$  Hz), 118.2, 86.3 (q,  $J = 30.7$  Hz), 19.9.  $^{19}\text{F}$  NMR (565 MHz,  $\text{CDCl}_3$ )  $\delta$  -74.95 (s). HRMS (ESI, m/z): calcd for  $\text{C}_{26}\text{H}_{19}\text{F}_3\text{NaO}_2^+$   $[\text{M} + \text{Na}]^+$ : 443.1229, found 443.1231.

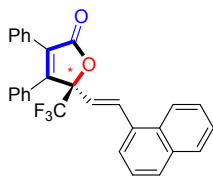

**4h**, General procedure **A**, yellow oil. 50.6 mg (55% yield). ee: 98%, HPLC analysis on a Chiralcel OD-H column (hexane/isopropanol = 99/1, flow rate 1.0 mL/min):  $t_R = 9.3$  min (major),  $t_R = 14.8$  min (minor).  $[\alpha]_D^{27} = 20.4$  (c 0.57,  $\text{CH}_2\text{Cl}_2$ ).  $^1\text{H}$  NMR (600 MHz,  $\text{CDCl}_3$ )  $\delta$  7.77 – 7.73 (m, 4H), 7.53 – 7.52 (m, 1H), 7.44 – 7.40 (m, 2H), 7.39 – 7.29 (m, 5H), 7.25 – 7.14 (m, 6H), 6.45 (d,  $J = 16.0$  Hz, 1H).  $^{13}\text{C}$  NMR (101 MHz,  $\text{CDCl}_3$ )  $\delta$  169.9, 157.0, 135.6, 133.8, 133.6, 132.4, 130.9, 130.0, 129.6, 129.5, 129.4, 129.2, 128.8, 128.6, 128.5, 128.4, 127.9, 127.0, 126.8, 123.3, 122.9 (q,  $J = 286.1$  Hz), 117.0, 86.3 (q,  $J = 30.8$  Hz).  $^{19}\text{F}$  NMR (565 MHz,  $\text{CDCl}_3$ )  $\delta$  -74.93 (s). HRMS (ESI, m/z): calcd for  $\text{C}_{29}\text{H}_{19}\text{F}_3\text{NaO}_2^+$   $[\text{M} + \text{Na}]^+$ : 479.1229, found 479.1226.

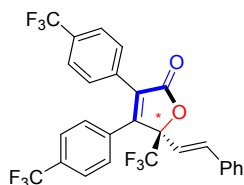

**4i**, General procedure **A**, mp: 179.5~180.1 °C. 22.8 mg (21% yield). ee: 99%, HPLC analysis on a Chiralcel OD-H column (hexane/isopropanol = 99/1, flow rate 1.0 mL/min):  $t_R = 10.1$  min (major),  $t_R = 7.8$  min (minor).  $[\alpha]_D^{28} = 6.7$  (c 0.3,  $\text{CH}_2\text{Cl}_2$ ).  $^1\text{H}$  NMR (600 MHz,  $\text{CDCl}_3$ )  $\delta$  7.66 (d,  $J = 8.2$  Hz, 2H),

7.48 (d,  $J = 8.2$  Hz, 2H), 7.42 – 7.37 (m, 4H), 7.36 – 7.29 (m, 5H), 7.10 (d,  $J = 16.0$  Hz, 1H), 6.28 (d,  $J = 16.0$  Hz, 1H).  $^{13}\text{C}$  NMR (151 MHz,  $\text{CDCl}_3$ )  $\delta$  168.8, 157.0, 136.5, 134.6, 134.0, 132.5 (dd,  $J = 66.3$ , 33.2 Hz), 131.9, 131.7, 131.4, 129.8, 129.7, 129.5, 129.2, 129.0, 127.4, 126.5 (dd,  $J = 7.2$ , 3.4 Hz), 125.7 (q,  $J = 3.8$  Hz), 124.6 (q,  $J = 16.5$  Hz), 122.8 (q,  $J = 16.9$  Hz), 121.7, 115.5, 86.4 (q,  $J = 30.8$  Hz).  $^{19}\text{F}$  NMR (565 MHz,  $\text{CDCl}_3$ )  $\delta$  -63.02 (s, 3F), -63.09 (s, 3F), -74.91 (s, 3F). HRMS (ESI,  $m/z$ ): calcd for  $\text{C}_{27}\text{H}_{15}\text{F}_9\text{NaO}_2^+$  [ $\text{M} + \text{Na}$ ] $^+$ : 565.0821, found 565.0794.

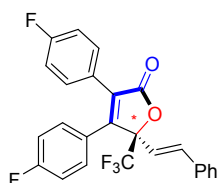

**4j**, General procedure **A**, mp: 112~114 °C. 53.1 mg (60% yield). ee: 98%, HPLC analysis on a Chiralcel AS-H column (hexane/isopropanol = 95/5, flow rate 0.8 mL/min):  $t_{\text{R}} = 9.3$  min (major),  $t_{\text{R}} = 11.3$  min (minor).  $[\alpha]_{\text{D}}^{25} = 7.2$  (c 0.3,  $\text{CH}_2\text{Cl}_2$ ).  $^1\text{H}$  NMR (600 MHz,  $\text{CDCl}_3$ )  $\delta$  7.41 – 7.35 (m, 2H), 7.34 – 7.26 (m, 5H), 7.20 – 7.14 (m, 2H), 7.10 – 7.03 (m, 3H), 6.93 – 6.87 (m, 2H), 6.30 (d,  $J = 16.0$  Hz, 1H).  $^{13}\text{C}$  NMR (151 MHz,  $\text{CDCl}_3$ )  $\delta$  169.6, 163.6 (d,  $J = 248.1$  Hz), 163.3 (d,  $J = 254.2$  Hz), 155.7, 135.9, 134.8, 131.4 (d,  $J = 8.2$  Hz), 130.7 (d,  $J = 8.5$  Hz), 129.6, 129.1, 129.0, 127.3, 126.6 (d,  $J = 3.2$  Hz), 124.3 (d,  $J = 3.3$  Hz), 122.8 (q,  $J = 286.0$  Hz), 116.8 (d,  $J = 21.9$  Hz), 116.3, 115.9 (d,  $J = 21.9$  Hz), 86.2 (q,  $J = 31.1$  Hz).  $^{19}\text{F}$  NMR (565 MHz,  $\text{CDCl}_3$ )  $\delta$  -75.03 (s, 3F), -109.56 – -109.62 (m, 1F), -109.98 – -110.04 (m, 1F). HRMS (ESI,  $m/z$ ): calcd for  $\text{C}_{25}\text{H}_{15}\text{F}_5\text{NaO}_2^+$  [ $\text{M} + \text{Na}$ ] $^+$ : 465.0884, found 465.0869.

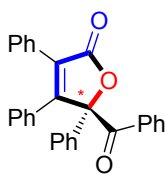

**5a**, General procedure **B**, yellow oil. 63.3 mg (76% yield). ee: 90%, HPLC analysis on a Chiralcel AD-H column (hexane/isopropanol = 95/5, flow rate 1.0 mL/min):  $t_{\text{R}} = 9.7$  min (major),  $t_{\text{R}} = 12.4$  min (minor).  $[\alpha]_{\text{D}}^{24} = -53.2$  (c 0.7,  $\text{CH}_2\text{Cl}_2$ ).  $^1\text{H}$  NMR (400 MHz,  $\text{CDCl}_3$ )  $\delta$  7.94 – 7.92 (m, 2H), 7.49 – 7.46 (m, 1H), 7.39 – 7.29 (m, 7H), 7.26 – 7.17 (m, 8H), 6.88 – 6.83 (m, 2H).  $^{13}\text{C}$  NMR (101 MHz,  $\text{CDCl}_3$ )  $\delta$  193.4, 171.3, 163.8, 134.9, 134.3, 133.6, 132.5, 131.0, 129.5, 129.4, 129.2, 129.0, 128.9, 128.4, 128.3, 128.1, 127.5, 126.1, 93.5. HRMS (ESI,  $m/z$ ): calcd for  $\text{C}_{29}\text{H}_{21}\text{O}_3^+$  [ $\text{M} + \text{H}$ ] $^+$ : 417.1485, found 417.1484.

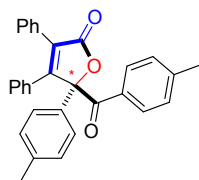

**5b**, General procedure **B**, yellow oil. 46.2 mg (52% yield). ee: 84.0%, HPLC analysis on a Chiralcel AD-H column (hexane/isopropanol = 95/5, flow rate 1.0 mL/min):  $t_R = 17.4$  min (major),  $t_R = 20.6$  min (minor).  $[\alpha]_D^{27} = -95.1$  (c 1.4,  $\text{CH}_2\text{Cl}_2$ ).  $^1\text{H}$  NMR (400 MHz,  $\text{CDCl}_3$ )  $\delta$  7.77 – 7.75 (m, 2H), 7.26 – 7.24 (m, 2H), 7.18 – 7.08 (m, 6H), 7.05 – 7.04 (m, 6H), 6.84 – 6.71 (m, 2H), 2.27 (s, 3H), 2.26 (s, 3H).  $^{13}\text{C}$  NMR (101 MHz,  $\text{CDCl}_3$ )  $\delta$  193.2, 171.4, 164.0, 144.6, 139.3, 132.8, 132.1, 132.0, 131.2, 129.7, 129.6, 129.5, 129.1, 128.9, 128.8, 128.3, 128.1, 127.4, 126.1, 93.6, 21.8, 21.4. HRMS (ESI, m/z): calcd for  $\text{C}_{31}\text{H}_{24}\text{NaO}_3^+$   $[\text{M} + \text{Na}]^+$ : 467.1618, found 467.1604.

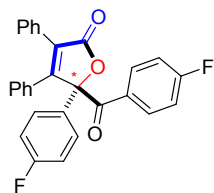

**5c**, General procedure **C**, yellow oil. 80.2 mg (89% yield). ee: 90.0%, HPLC analysis on a Chiralcel AD-H column (hexane/isopropanol = 95/5, flow rate 1.0 mL/min):  $t_R = 9.5$  min (major),  $t_R = 16.1$  min (minor).  $[\alpha]_D^{28} = -96.2$  (c 2.6,  $\text{CH}_2\text{Cl}_2$ ).  $^1\text{H}$  NMR (400 MHz,  $\text{CDCl}_3$ )  $\delta$  7.90 – 7.87 (m, 2H), 7.27 – 7.25 (m, 2H), 7.24 – 7.10 (m, 8H), 6.99 – 6.91 (m, 4H), 6.81 – 6.79 (m, 2H).  $^{13}\text{C}$  NMR (101 MHz,  $\text{CDCl}_3$ )  $\delta$  191.8, 170.9, 160.0 (d,  $J = 257.2$  Hz), 163.5, 163.2 (d,  $J = 250.0$  Hz), 133.8 (d,  $J = 9.5$  Hz), 132.3, 130.7 (d,  $J = 3.4$  Hz), 130.6 (d,  $J = 3.0$  Hz), 129.5, 129.4, 129.2, 129.1, 129.0, 128.4, 128.3, 128.0 (d,  $J = 8.5$  Hz), 127.7, 116.3 (d,  $J = 21.9$  Hz), 115.8 (d,  $J = 21.9$  Hz), 92.9.  $^{19}\text{F}$  NMR (377 MHz,  $\text{CDCl}_3$ )  $\delta$  -103.13 – -103.22 (m, 1F), -111.08 – -111.17 (m, 1F). HRMS (ESI, m/z): calcd for  $\text{C}_{29}\text{H}_{19}\text{F}_2\text{O}_3^+$   $[\text{M} + \text{H}]^+$ : 453.1297, found 453.1286.

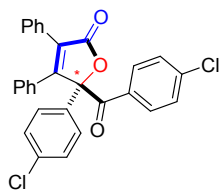

**5d**, General procedure **C**, yellow oil. 62.1 mg (64% yield). ee: 92%, HPLC analysis on a Chiralcel AD-H column (hexane/isopropanol = 95/5, flow rate 1.0 mL/min):  $t_R = 11.7$  min (major),  $t_R = 17.8$  min (minor).  $[\alpha]_D^{27} = -55.0$  (c 3.7,  $\text{CH}_2\text{Cl}_2$ ).  $^1\text{H}$  NMR (400 MHz,  $\text{CDCl}_3$ )  $\delta$  7.77 (d,  $J = 8.6$  Hz, 2H), 7.29 –

7.20 (m, 6H), 7.20 – 7.13 (m, 6H), 7.09 (d,  $J = 8.6$  Hz, 2H), 6.82 (d,  $J = 7.4$  Hz, 2H).  $^{13}\text{C}$  NMR (101 MHz,  $\text{CDCl}_3$ )  $\delta$  192.0, 170.7, 163.1, 140.5, 135.7, 133.3, 132.5, 132.3, 132.1, 129.5, 129.5, 129.4, 129.3, 129.1, 128.9, 128.4, 128.4, 127.9, 127.4, 92.7. HRMS (ESI,  $m/z$ ): calcd for  $\text{C}_{29}\text{H}_{19}\text{Cl}_2\text{O}_3^+$  [ $\text{M} + \text{H}$ ] $^+$ : 485.0706, found 485.0702.

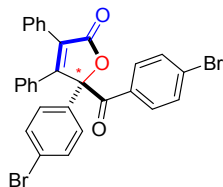

**5e**, General procedure C, yellow oil. 100.5 mg (88 % yield). ee: 92.0%, HPLC analysis on a Chiralcel AD-H column (hexane/isopropanol = 95/5, flow rate 1.0 mL/min):  $t_{\text{R}} = 13.5$  min (major),  $t_{\text{R}} = 20.2$  min (minor).  $[\alpha]_{\text{D}}^{27} = -62.3$  (c 2.5,  $\text{CH}_2\text{Cl}_2$ ).  $^1\text{H}$  NMR (400 MHz,  $\text{CDCl}_3$ )  $\delta$  7.70 – 7.68 (m, 2H), 7.44 – 7.36 (m, 4H), 7.29 – 7.10 (m, 8H), 7.03 – 7.01 (m, 2H), 6.84 – 6.78 (m, 2H).  $^{13}\text{C}$  NMR (101 MHz,  $\text{CDCl}_3$ )  $\delta$  192.2, 170.7, 163.0, 133.9, 132.9, 132.6, 132.3, 132.1, 132.0, 131.4, 129.5, 129.5, 129.4, 129.3, 129.2, 128.9, 128.4, 128.4, 127.9, 127.6, 123.9, 92.8. HRMS (ESI,  $m/z$ ): calcd for  $\text{C}_{29}\text{H}_{18}\text{Br}_2\text{NaO}_3^+$  [ $\text{M} + \text{Na}$ ] $^+$ : 594.9515, found 594.9511.

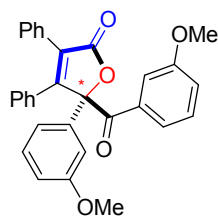

**5g**, General procedure C, room temperature, yellow oil. 67.4 mg (71% yield). ee: 78.0%, HPLC analysis on a Chiralcel AD-H column (hexane/isopropanol = 95/5, flow rate 1.0 mL/min):  $t_{\text{R}} = 18.0$  min (major),  $t_{\text{R}} = 16.3$  min (minor).  $[\alpha]_{\text{D}}^{27} = -99.4$  (c 1.5,  $\text{CH}_2\text{Cl}_2$ ).  $^1\text{H}$  NMR (400 MHz,  $\text{CDCl}_3$ )  $\delta$  7.47 – 7.37 (m, 2H), 7.27 – 7.25 (m, 2H), 7.22 – 7.09 (m, 8H), 6.96 – 6.93 (m, 1H), 6.84 – 6.79 (m, 3H), 6.74 – 6.70 (m, 2H), 3.65 (s, 3H), 3.59 (s, 3H).  $^{13}\text{C}$  NMR (101 MHz,  $\text{CDCl}_3$ )  $\delta$  193.1, 171.1, 163.7, 160.0, 159.5, 136.4, 135.6, 132.6, 130.0, 129.6, 129.5, 129.4, 129.3, 129.0, 128.9, 128.3, 128.1, 127.6, 123.9, 120.5, 120.1, 118.5, 115.1, 114.8, 113.4, 111.3, 93.4, 83.7, 55.5, 29.8. HRMS (ESI,  $m/z$ ): calcd for  $\text{C}_{31}\text{H}_{24}\text{NaO}_5^+$  [ $\text{M} + \text{Na}$ ] $^+$ : 499.1516, found 499.1509.

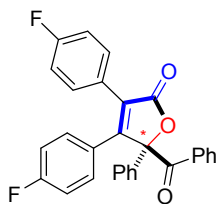

**5h**, General procedure C, yellow oil. 71.2 mg (79% yield). ee: 90.0%, HPLC analysis on a Chiralcel AD-H column (hexane/isopropanol = 95/5, flow rate 1.0 mL/min):  $t_R$  = 8.8 min (major),  $t_R$  = 11.9 min (minor).  $[\alpha]_D^{26}$  = -95.1 (c 1.1,  $\text{CH}_2\text{Cl}_2$ ).  $^1\text{H}$  NMR (400 MHz,  $\text{CDCl}_3$ )  $\delta$  7.86 – 7.83 (m, 2H), 7.44 – 7.40 (m, 1H), 7.33 – 7.21 (m, 7H), 7.19 – 7.12 (m, 2H), 6.93 – 6.80 (m, 4H), 6.80 – 6.73 (m, 2H).  $^{13}\text{C}$  NMR (151 MHz,  $\text{CDCl}_3$ )  $\delta$  193.4, 171.0, 163.1 (d,  $J$  = 249.9 Hz), 163.0 (d,  $J$  = 250.3 Hz), 162.8, 134.6, 134.1, 133.8, 131.5 (d,  $J$  = 4.0 Hz), 131.4 (d,  $J$  = 3.4 Hz), 131.1, 129.6, 129.2, 128.5, 128.3 (d,  $J$  = 3.5 Hz), 126.9, 125.9, 125.1 (d,  $J$  = 3.2 Hz), 115.7 (d,  $J$  = 6.5 Hz), 115.5 (d,  $J$  = 6.5 Hz), 93.5.  $^{19}\text{F}$  NMR (565 MHz,  $\text{CDCl}_3$ )  $\delta$  -111.12 – -111.21 (m, 1F), -111.31 – -111.40 (m, 1F). HRMS (ESI, m/z): calcd for  $\text{C}_{29}\text{H}_{18}\text{F}_2\text{NaO}_3^+$   $[\text{M} + \text{Na}]^+$ : 475.1116, found 475.1115.

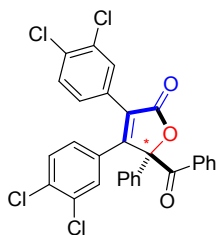

**5i**, General procedure C, yellow oil. 90.4 mg (82% yield). ee: 90.0%, HPLC analysis on a Chiralcel AD-H column (hexane/isopropanol = 95/5, flow rate 1.0 mL/min):  $t_R$  = 7.4 min (major),  $t_R$  = 11.1 min (minor).  $[\alpha]_D^{25}$  = -84.4 (c 1.6,  $\text{CH}_2\text{Cl}_2$ ).  $^1\text{H}$  NMR (400 MHz,  $\text{CDCl}_3$ )  $\delta$  7.86 – 7.83 (m, 2H), 7.45 – 7.40 (m, 1H), 7.33 – 7.26 (m, 5H), 7.22 – 7.13 (m, 4H), 7.10 – 7.06 (m, 2H), 6.74 (m, 1H), 6.69 – 6.60 (m, 1H).  $^{13}\text{C}$  NMR (101 MHz,  $\text{CDCl}_3$ )  $\delta$  193.1, 170.3, 163.3, 134.5, 134.3, 134.0, 133.9, 131.1, 130.6, 129.8, 129.7, 129.6, 129.5, 129.4, 129.3, 129.2, 128.5, 127.8, 127.6, 127.0, 125.9, 93.6. HRMS (ESI, m/z): calcd for  $\text{C}_{29}\text{H}_{16}\text{Cl}_4\text{NaO}_3^+$   $[\text{M} + \text{Na}]^+$ : 574.9746, found 574.9751.

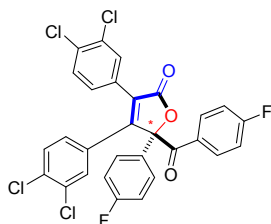

**5j**, General procedure B, yellow oil. 94.3 mg (68% yield). ee: 88%, HPLC analysis on a Chiralcel AD-H column (hexane/isopropanol = 95/5, flow rate 1.0 mL/min):  $t_R = 7.8$  min (major),  $t_R = 14.2$  min (minor).  $[\alpha]_D^{23} = -113.8$  (c 3.9,  $\text{CH}_2\text{Cl}_2$ ).  $^1\text{H}$  NMR (400 MHz,  $\text{CDCl}_3$ )  $\delta$  7.92 – 7.76 (m, 2H), 7.32 – 7.31 (m, 1H), 7.22 – 7.15 (m, 2H), 7.14 – 7.09 (m, 2H), 7.08 – 7.06 (m, 2H), 7.02 – 6.89 (m, 4H), 6.83 – 6.82 (m, 1H), 6.65 – 6.63 (m, 1H).  $^{13}\text{C}$  NMR (101 MHz,  $\text{CDCl}_3$ )  $\delta$  191.4, 169.9, 166.0 (d,  $J = 257.8$  Hz), 163.3 (d,  $J = 250.8$  Hz), 162.9, 134.4 (d,  $J = 8.8$  Hz), 133.9 (d,  $J = 9.5$  Hz), 133.5, 130.2, 130.0 (d,  $J = 2.9$  Hz), 129.9 (d,  $J = 3.2$  Hz), 129.7, 129.6, 129.5, 129.4, 129.2, 127.8, 127.7, 127.7, 127.6, 127.1, 116.5 (d,  $J = 22.1$  Hz), 115.8 (d,  $J = 22.0$  Hz), 92.8.  $^{19}\text{F}$  NMR (376 MHz,  $\text{CDCl}_3$ )  $\delta$  -102.46 – -102.50 (m), -110.28 – -110.35 (m). HRMS (ESI, m/z): calcd for  $\text{C}_{29}\text{H}_{15}\text{Cl}_4\text{F}_2\text{O}_3^+$   $[\text{M} + \text{H}]^+$ : 588.9738, found 588.9741.

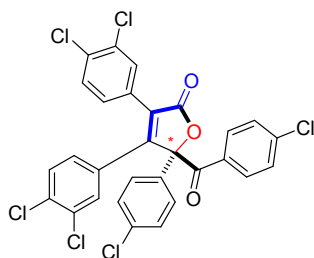

**5k**, General procedure B, yellow oil. 119.1 mg (87.8% yield). ee: 90%, HPLC analysis on a Chiralcel AD-H column (hexane/isopropanol = 95/5, flow rate 1.0 mL/min):  $t_R = 8.9$  min (major),  $t_R = 16.6$  min (minor).  $[\alpha]_D^{23} = -109.3$  (c 2.8,  $\text{CH}_2\text{Cl}_2$ ).  $^1\text{H}$  NMR (400 MHz, Acetone- $d_6$ )  $\delta$  7.80 – 7.78 (m, 2H), 7.43 – 7.30 (m, 5H), 7.25 (s, 2H), 7.19 – 7.15 (m, 2H), 7.13 – 7.11 (m, 1H), 6.94 (s, 1H), 6.77 – 6.75 (m, 1H).  $^{13}\text{C}$  NMR (101 MHz, Acetone- $d_6$ )  $\delta$  192.7, 170.0, 162.6, 140.7, 136.2, 134.7, 134.5, 134.5, 133.9, 133.6, 133.2, 131.9, 130.8, 130.8, 130.2, 130.2, 130.1, 130.0, 130.0, 130.0, 128.9, 128.9, 128.7, 128.7, 93.5. HRMS (ESI, m/z): calcd for  $\text{C}_{29}\text{H}_{15}\text{Cl}_6\text{O}_3^+$   $[\text{M} + \text{H}]^+$ : 620.9147, found 620.9145.

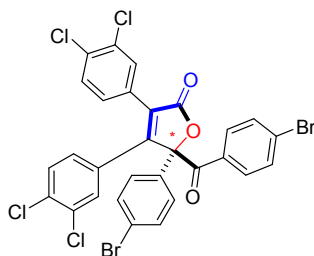

**5l**, General procedure C, yellow oil. 115.5 mg (81% yield). ee: 86%, HPLC analysis on a Chiralcel AD-H column (hexane/isopropanol = 95/5, flow rate 1.0 mL/min):  $t_R = 10.1$  min (major),  $t_R = 18.8$  min (minor).  $[\alpha]_D^{24} = -90.5$  (c 2.6,  $\text{CH}_2\text{Cl}_2$ ).  $^1\text{H}$  NMR (400 MHz, Acetone- $d_6$ )  $\delta$  7.77 – 7.64 (m, 2H), 7.56 – 7.48 (m, 4H), 7.34 – 7.33 (m, 1H), 7.27 – 7.24 (m, 1H), 7.21 – 7.17 (m, 2H), 7.16 – 7.16 (m, 1H), 7.14 –

7.10 (m, 1H), 6.95 – 6.94 (m, 1H), 6.77 – 6.75 (m, 1H).  $^{13}\text{C}$  NMR (101 MHz, Acetone- $d_6$ )  $\delta$ 192.9, 167.0, 162.5, 134.7, 134.5, 134.5, 134.4, 133.9, 133.3, 133.2, 132.7, 131.9, 130.9, 130.8, 130.2, 130.1, 130.0, 130.0, 129.5, 128.9, 128.7, 124.4, 93.5. HRMS (ESI, m/z): calcd for  $\text{C}_{29}\text{H}_{15}\text{Br}_2\text{Cl}_4\text{O}_3^+$  [M + H] $^+$ : 708.8137, found 708.8140.

#### 4. TOF Study.

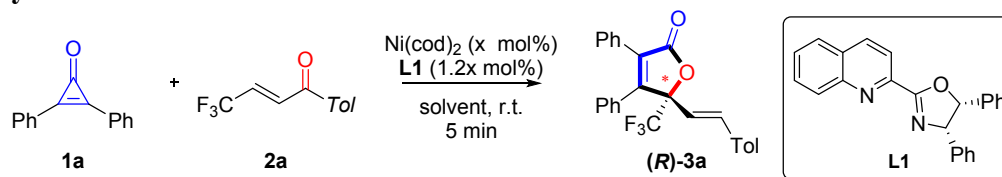

To a solution of the chiral catalyst  $\text{Ni}(\text{cod})_2/\text{L1}$  (0.20  $\mu\text{mol}$ : 0.04 mL of a  $5 \times 10^{-3}$  mmol/mL stock solution in MeOtBu) in MeO'Bu (2.0 mL) under the argon atmosphere. cyclopropenone **1a** (42 mg, 0.2 mmol, 1.00 equiv) and  $\alpha, \beta$ -unsaturated ketone **2a** (42 mg, 0.2 mmol, 1.0 equiv) was added. The reaction vessel was then sealed and placed in an oil bath at room temperature for 5 min, The reaction mixture was filtered through a pad of celite, eluted with ethyl acetate, concentrated, and purified by silica gel chromatography (PE : EA = 10:1) to give the indicated product **3a** (75.6 mg, yield 91%, ee 93%). HPLC analysis on a Chiralcel OD-H column (hexane/isopropanol = 99/1, flow rate 0.5 mL/min):  $t_R = 15.6$  min (major),  $t_R = 27.3$  min (minor).  $^1\text{H}$  NMR (600 MHz,  $\text{CDCl}_3$ ):  $\delta$  7.36 (dd,  $J = 7.6, 1.8$  Hz, 2H), 7.29 – 7.19 (m, 4H), 7.19 – 7.09 (m, 6H), 6.81 (d,  $J = 7.4$  Hz, 2H), 6.70 (dd,  $J = 15.6, 1.9$  Hz, 1H), 6.28 (m, 1H), 2.32 (s, 3H).

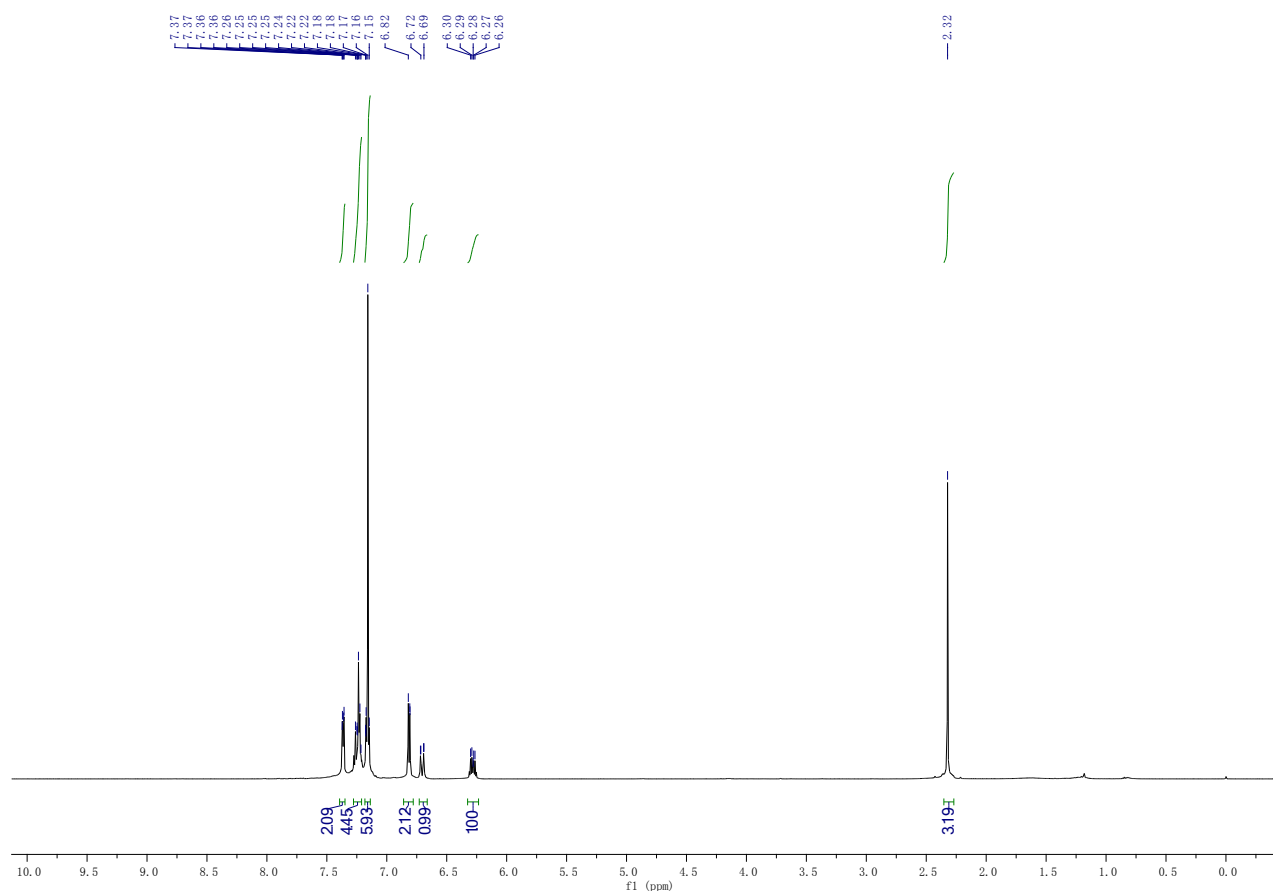



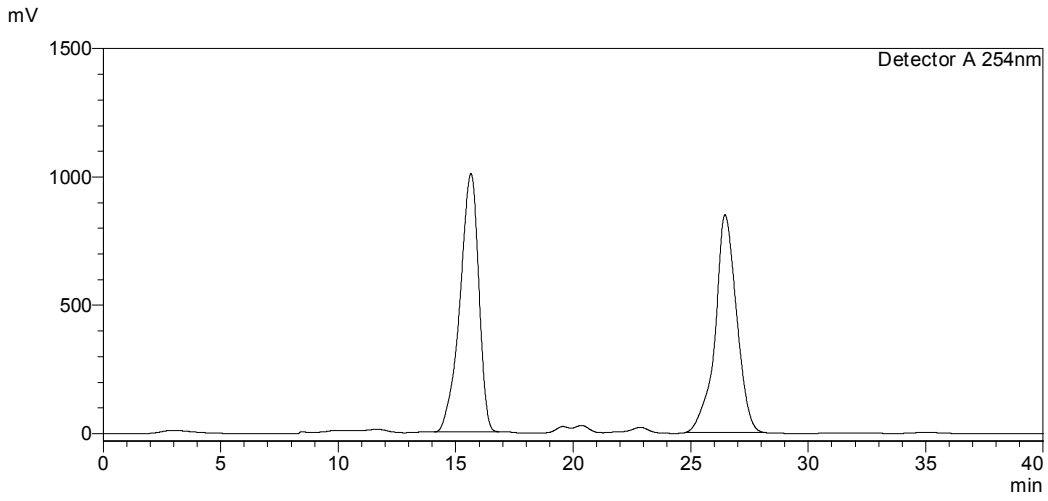

| Peak# | Ret. Time | Area     | Height  | Conc.  |
|-------|-----------|----------|---------|--------|
| 1     | 15.650    | 55917962 | 1006967 | 50.856 |
| 2     | 26.461    | 54035576 | 848978  | 49.144 |

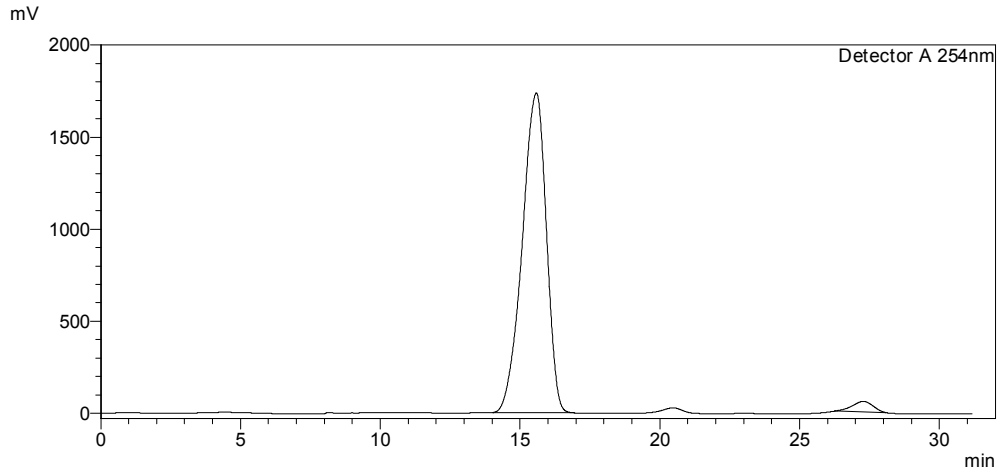

| Peak# | Ret. Time | Area      | Height  | Conc.  |
|-------|-----------|-----------|---------|--------|
| 1     | 15.581    | 104151757 | 1737350 | 97.244 |
| 2     | 27.279    | 2952283   | 57071   | 2.756  |

## 5. Mechanistic Studies

### 5.1 Identify of Reaction Intermediate

#### 5.1.1 Characterization of the olfine-Ni complex **6**

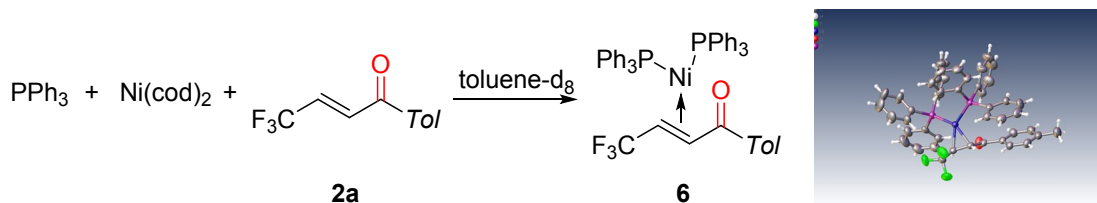

Ni(cod)<sub>2</sub> (3.5 mg, 0.0125 mmol, 1.0 equiv) and PPh<sub>3</sub> (6.6 mg, 0.025 mmol, 2.0 equiv) in toluene-*d*<sub>8</sub> (1.0 mL) were charged into a 25 mL pressure tube under the argon atmosphere. The mixture was stirred for 10 min at room temperature, followed by addition of α, β-unsaturated ketone **2a** (2.7 mg, 0.0125 mmol, 1.00 equiv). The reaction stirred for 8 h providing a deep red solution. The reaction mixture was transferred to the NMR tube directly in the dry box. <sup>1</sup>H NMR (600 MHz, toluene-*d*<sub>8</sub>): δ 7.72 (m, 5H), 7.53 (d, *J* = 5.8 Hz, 2H), 7.30 (m, 6H), 7.11 – 6.83 (m, 18H), 6.68 (d, *J* = 6.0 Hz, 2H), 4.60-4.40 (m, 1H), 3.85-3.75 (m, 1H), 2.02 (s, 3H). <sup>19</sup>F NMR (565 MHz, toluene-*d*<sub>8</sub>) δ -52.73 (d, *J* = 9.2 Hz). <sup>31</sup>P NMR (243 MHz, toluene-*d*<sub>8</sub>) δ 36.03 (d, *J* = 20.7 Hz, 1P), 28.92-29.02 (m, 1P). <sup>13</sup>C NMR (151 MHz, toluene-*d*<sub>8</sub>) δ 191.4, 140.0, 134.9, 134.7, 134.7, 134.4, 133.9 (d, *J* = 12.8 Hz), 133.7 (d, *J* = 13.0 Hz), 55.3 (d, *J* = 13.0 Hz), 49.8-49.2 (m), 20.9.

Toluene-*d*<sub>8</sub> and 1,5-Cyclooctadiene (cod) was removed using reduced pressure in the dry-box. <sup>1</sup>H NMR (400 MHz, C<sub>6</sub>D<sub>6</sub>) δ 7.90 (m, 6H), 7.74 (d, *J* = 7.3 Hz, 2H), 7.55 – 7.42 (m, 6H), 7.24 – 6.92 (m, 18H), 6.83 (d, *J* = 7.4 Hz, 2H), 4.75-4.60 (m, 1H), 4.20-4.00 (m, 1H), 2.11 (s, 3H). <sup>19</sup>F NMR (376 MHz, C<sub>6</sub>D<sub>6</sub>) δ -52.69 (t, *J* = 9.8 Hz).

The X-ray of **6** was obtained with the toluene-*d*<sub>8</sub>/hexane (2/1) in the dry box under the argon atmosphere.

<sup>1</sup>H NMR

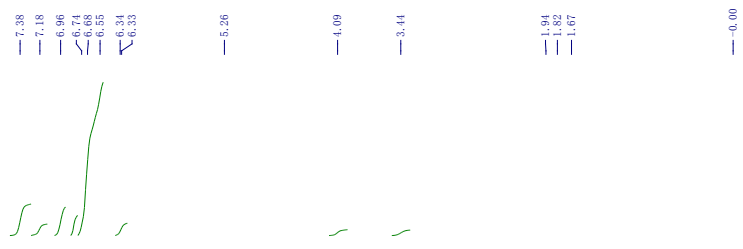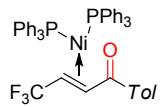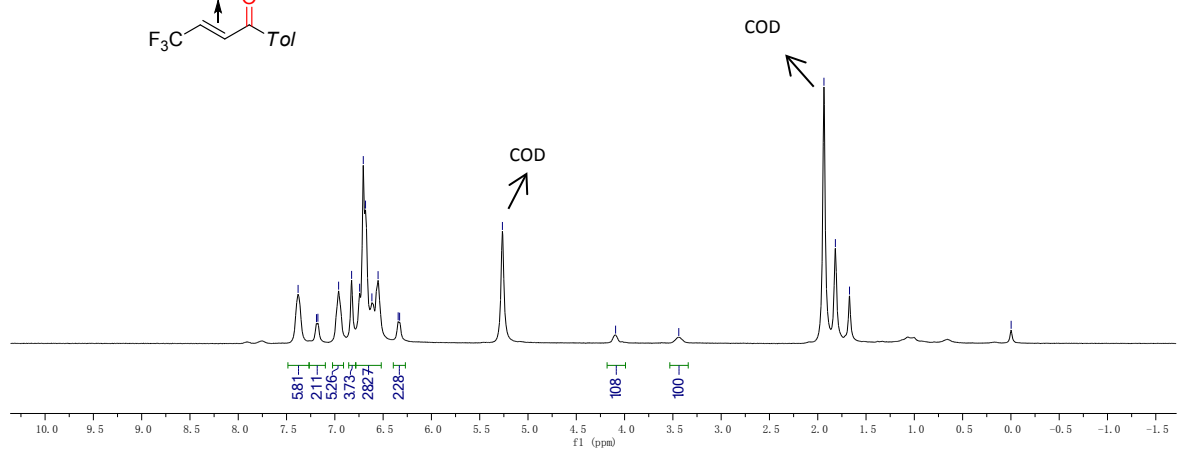

<sup>19</sup>F NMR

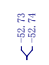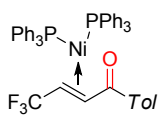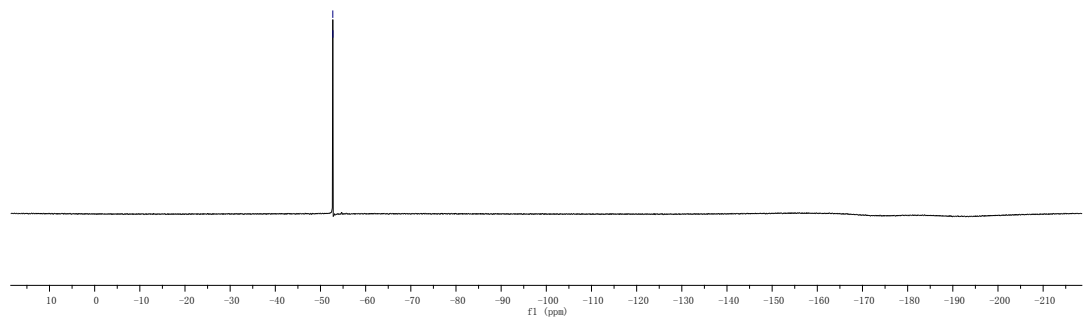

$^{31}\text{P}$  NMR

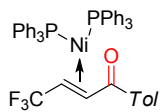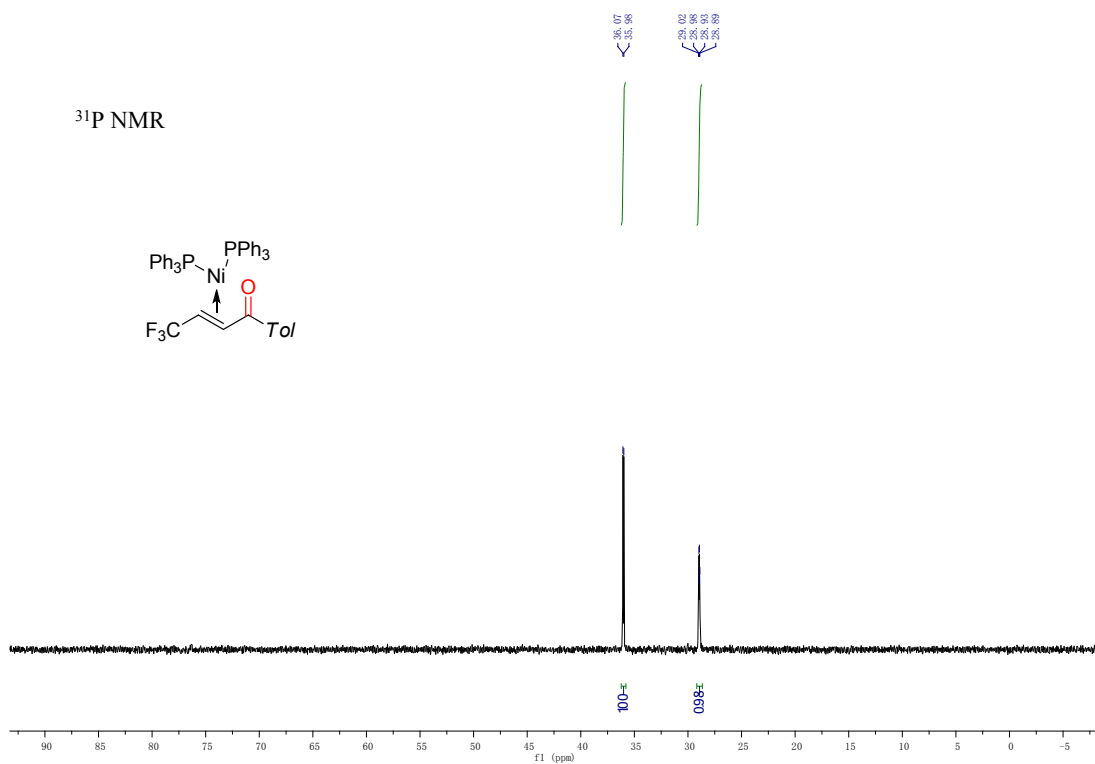

$^{13}\text{C}$  NMR

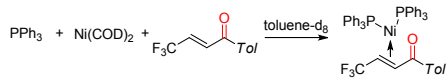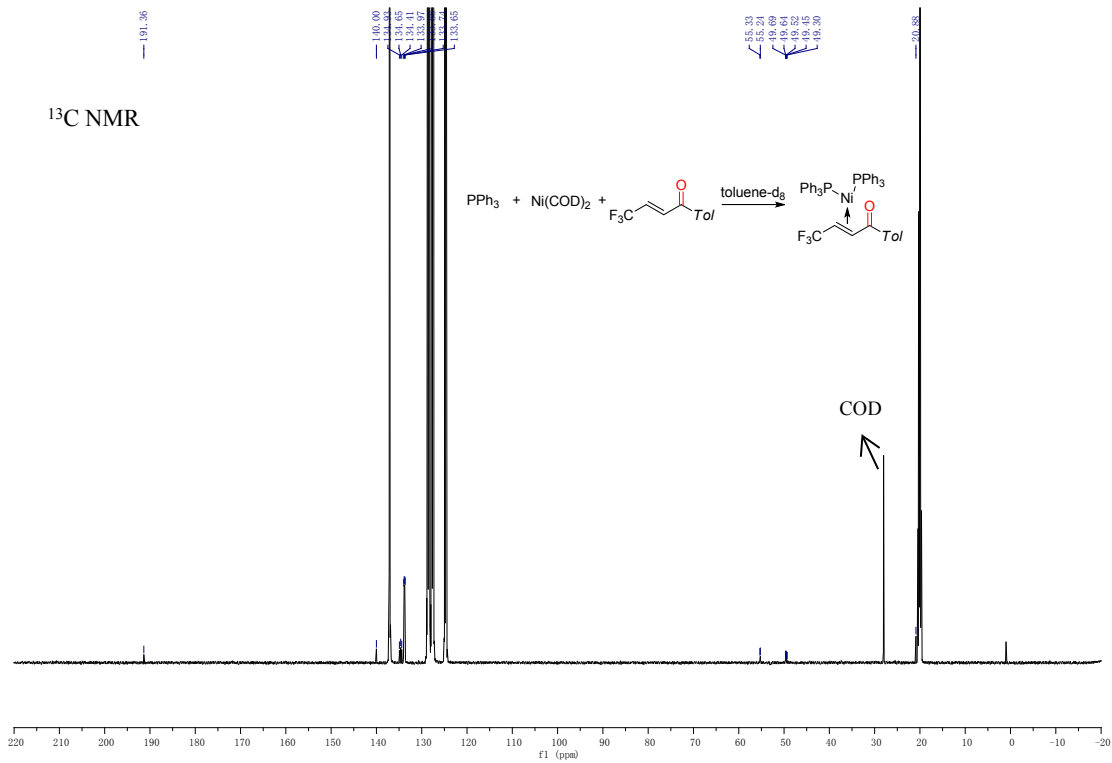

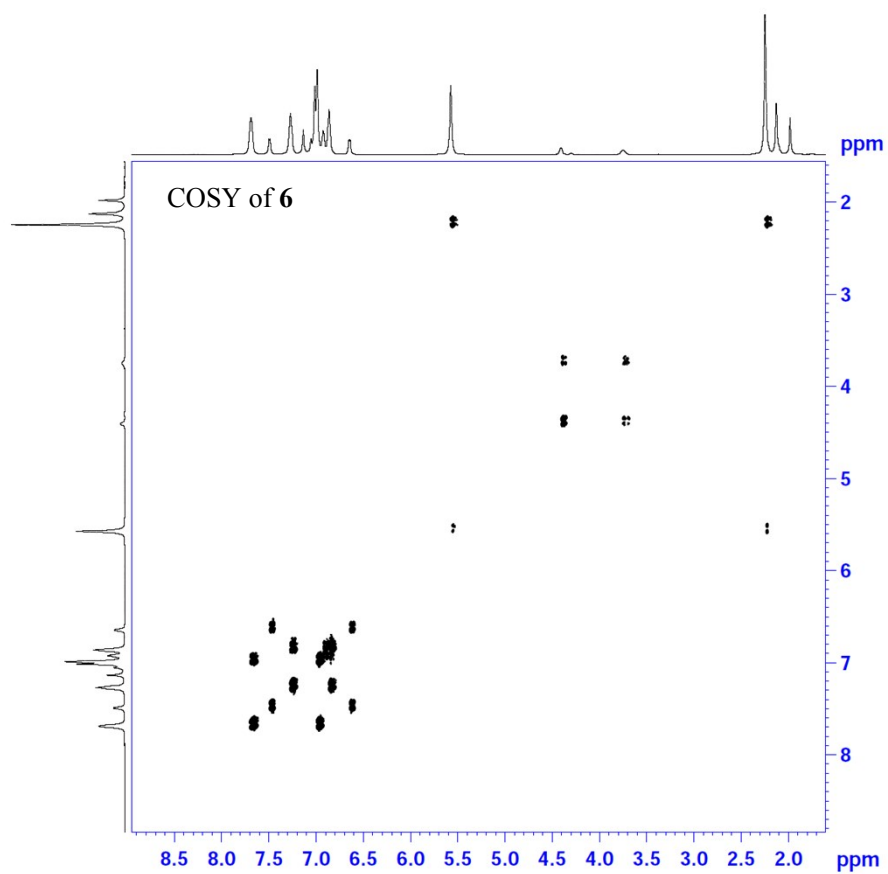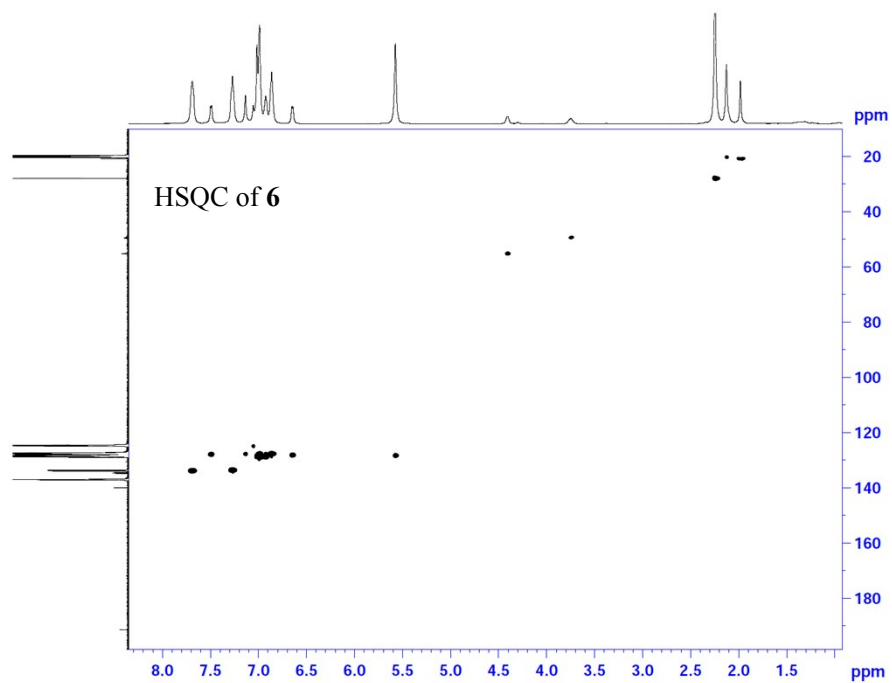

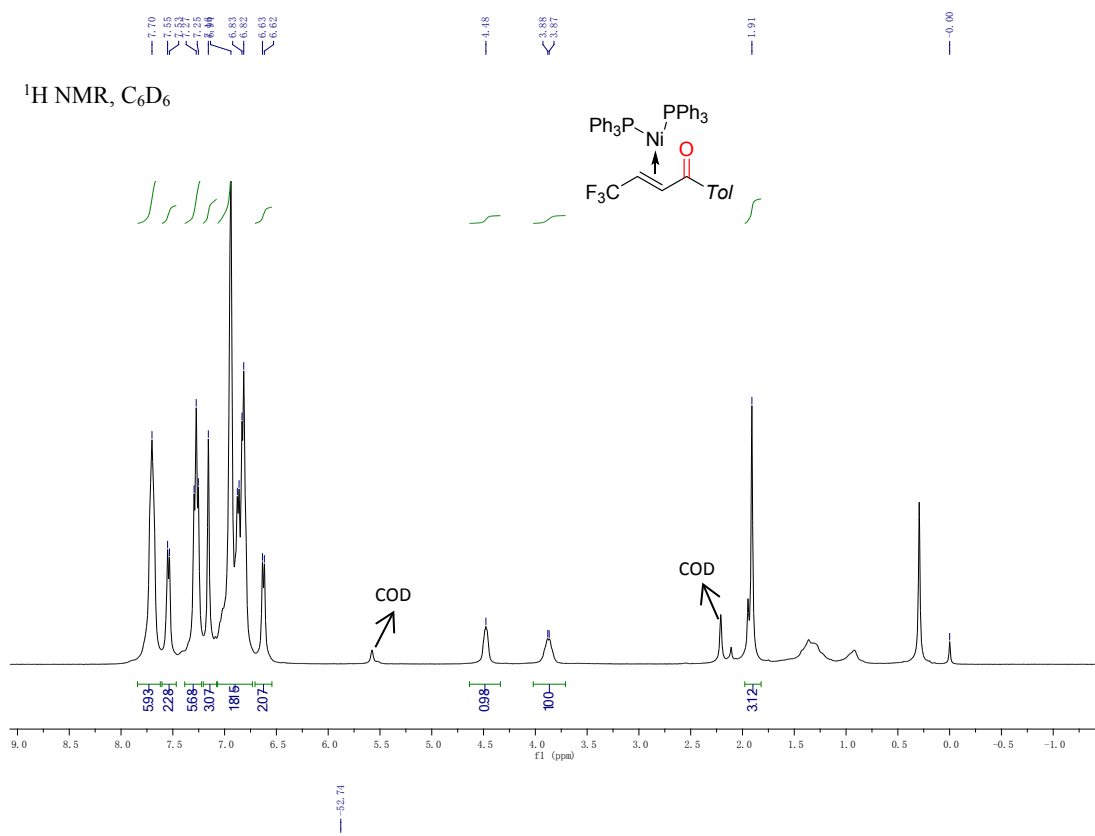

<sup>19</sup>F NMR, C<sub>6</sub>D<sub>6</sub>

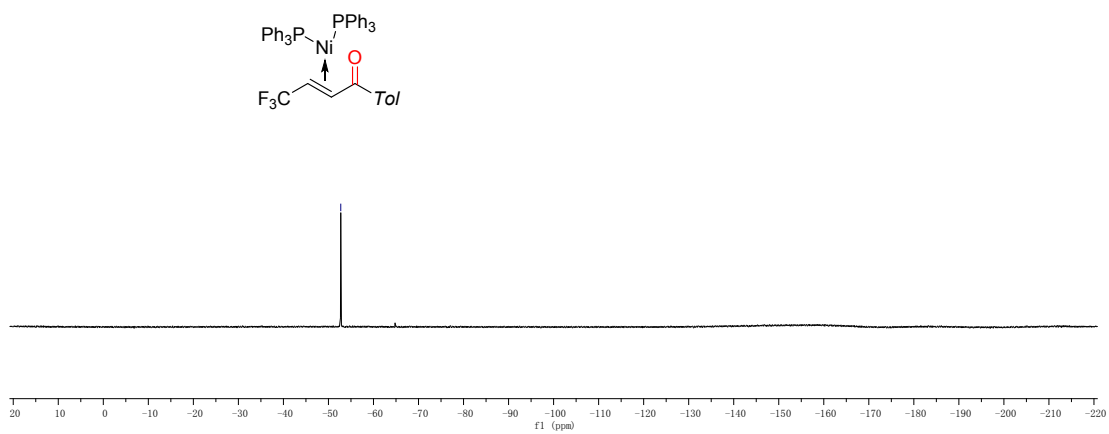

## 5.1.2 Capture of the CP2 in the reaction system

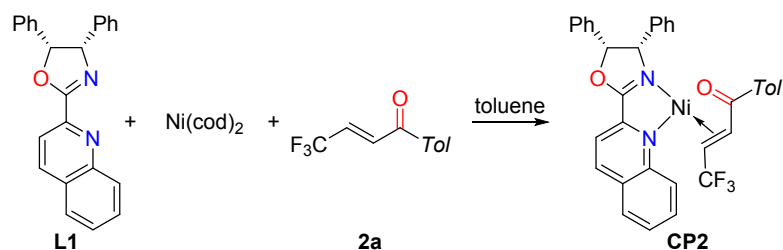

Ni(cod)<sub>2</sub> (3.5 mg, 0.0125 mmol, 1.0 equiv) and **L1** (5.6 mg, 0.016 mmol, 1.3 equiv) in toluene (1.0 mL) were charged into a 25 mL pressure tube under the argon atmosphere. The mixture was stirred for 10 min at room temperature, followed by addition of α, β-unsaturated ketone **2a** (2.7 mg, 0.0125 mmol, 1.00 equiv). The reaction stirred for 1h providing a deep green solution. toluene and 1,5-Cyclooctadiene (cod) was removed using reduced pressure in the dry-box. <sup>1</sup>H NMR (400 MHz, toluene-*d*<sub>8</sub>) δ (major diastereomer) 5.15-5.05 (m, 1H), 4.68-4.62 (m, 1H), 3.68-3.61(m, 1H), 3.35-3.25 (m, 1H). δ (minor diastereomer) 4.20-4.12 (m, 1H), 2.58-2.48 (m, 1H), <sup>19</sup>F NMR (565 MHz, toluene-*d*<sub>8</sub>) δ (major diastereomer) -52.01 (m), δ (minor diastereomer) -53.19 (m).

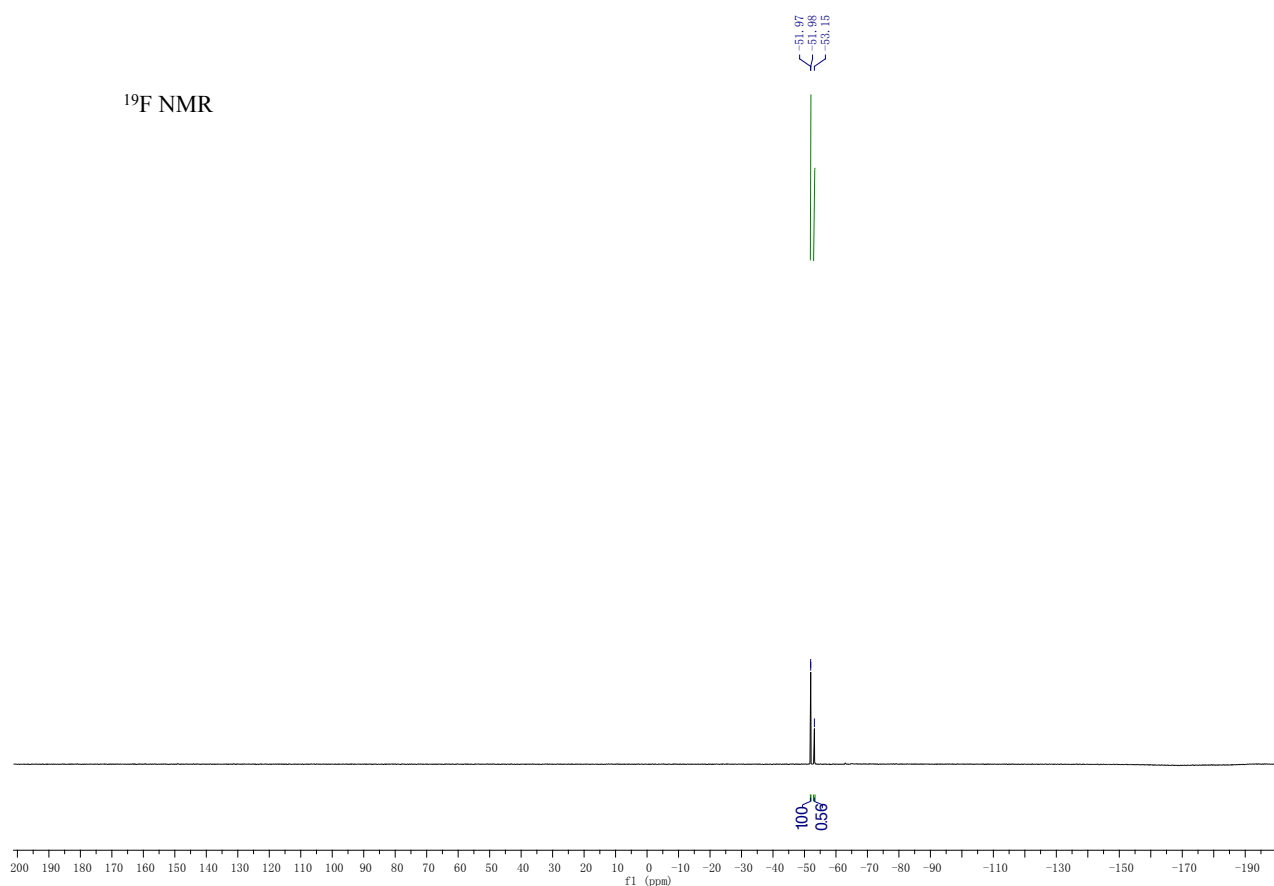

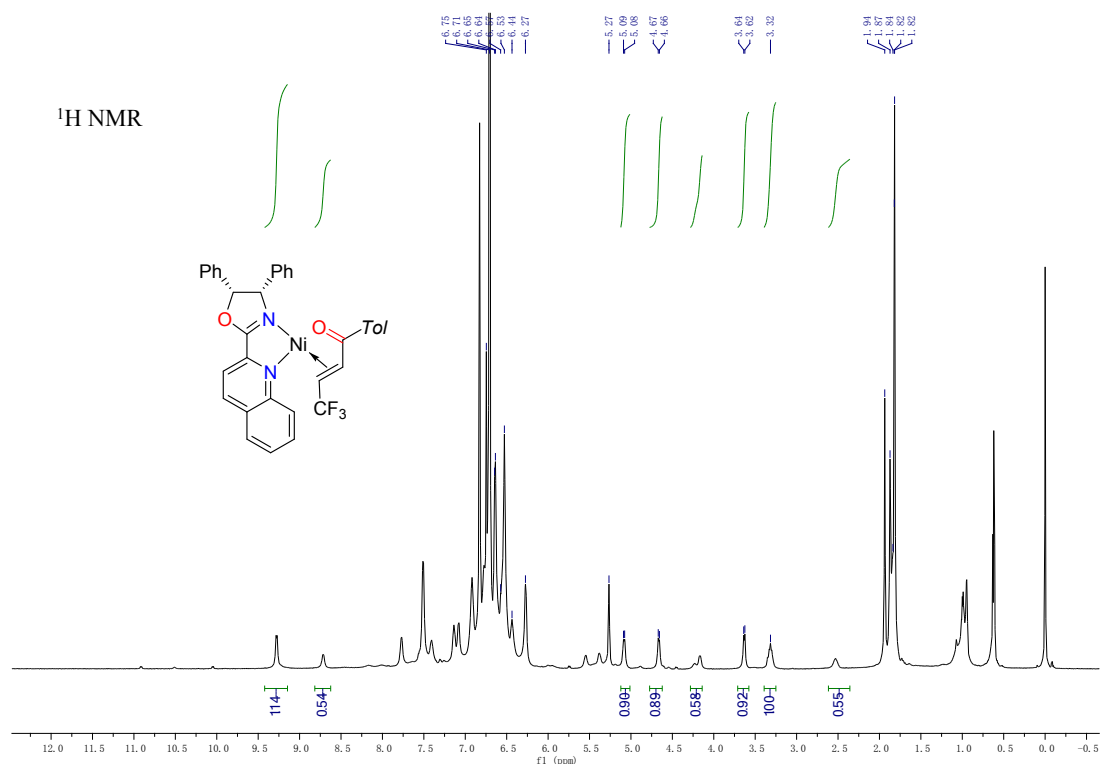

The reaction proceeded very quickly and transformed completed within 5 min following the general procedures (0.1 M of **1a**), The <sup>19</sup>F NMR peak of the **CP2** peak could not be obtained with 1.0 mmol % or 10 mmol% catalysis using toluene as solvent. When the solvent was changed to THF and the concentration decreased to 0.025 M, the <sup>19</sup>F NMR peak of **CP2** and the **3a** was observed within 5 min, When the concentration decreased to 0.005 M, the **CP2** could be observed in the first 10 min, and the reaction completed within 15 min and the <sup>19</sup>F NMR peak of the **CP2** disappeared.

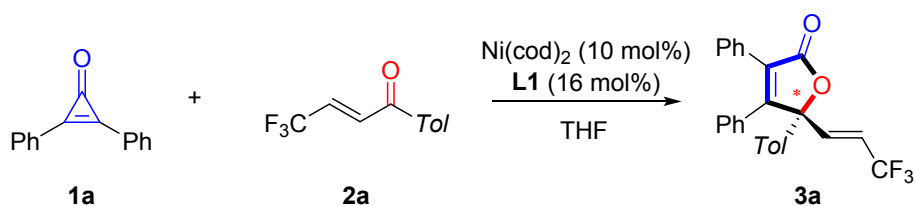

Procedures: Ni(cod)<sub>2</sub> (2.75 mg, 0.01 mmol, 0.01 equiv) and **L1** (6.2 mg, 0.016 mmol, 0.017 equiv) in THF (4.0 mL) were charged into pressure tube under the argon atmosphere. The mixture was stirred for 10 min at room temperature, followed by addition of cyclopropanone **1a** (21 mg, 0.1 mmol, 1.00 equiv),  $\alpha$ ,  $\beta$ -unsaturated ketone **2a** (21 mg, 0.1 mmol, 1.0 equiv) and 4-(trifluoromethyl)anisole (17.6 mg, 0.1 mmol, 1.00 equiv). The reaction mixture was transferred to the NMR tube immediately, and <sup>19</sup>F NMR was obtained as quickly as possible.



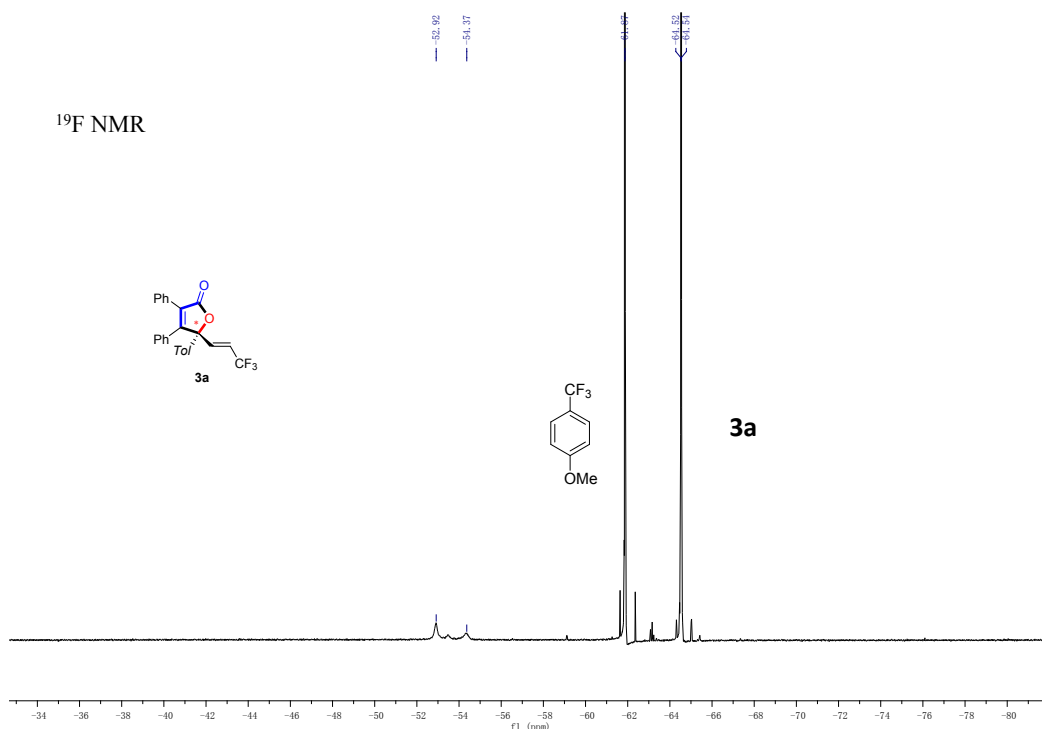

Ni(cod)<sub>2</sub> (2.75 mg, 0.01 mmol, 0.01 equiv) and **L1** (6.2 mg, 0.016 mmol, 0.016 equiv) in THF (20.0 mL) were charged into pressure tube under the argon atmosphere. The mixture was stirred for 10 min at room temperature, followed by addition of cyclopropenone **1a** (21 mg, 0.1 mmol, 1.00 equiv),  $\alpha$ ,  $\beta$ -unsaturated ketone **2a** (21 g, 0.1 mmol, 1.0 equiv) and 4-(trifluoromethyl)anisole (17.6 mg, 0.1 mmol, 1.00 equiv). The reaction mixture was transfer to the NMR tube immediately, and <sup>19</sup>F NMR of **CP2** was obtained in the first 10 min.

<sup>19</sup>F NMR within 10 min

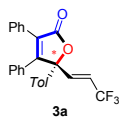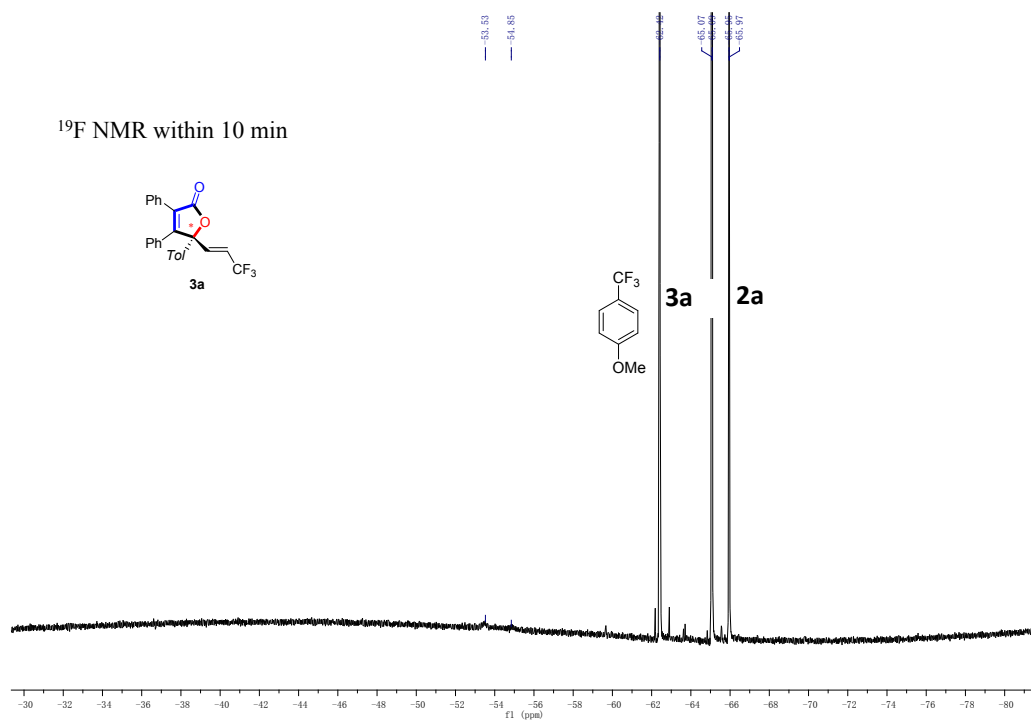

<sup>19</sup>F NMR after 15 min

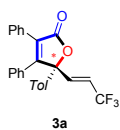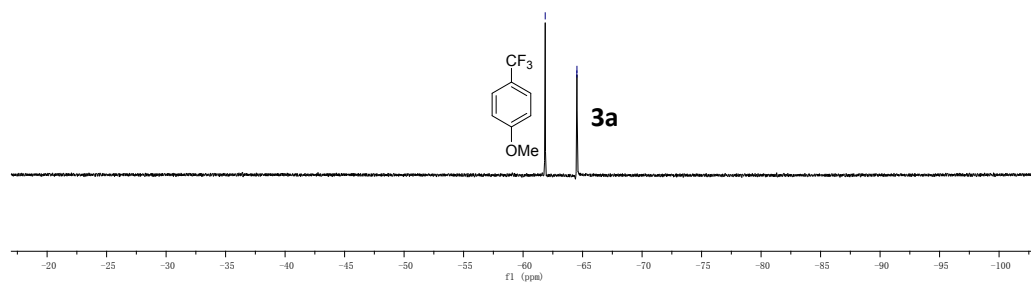

## 5.2 Resting state study

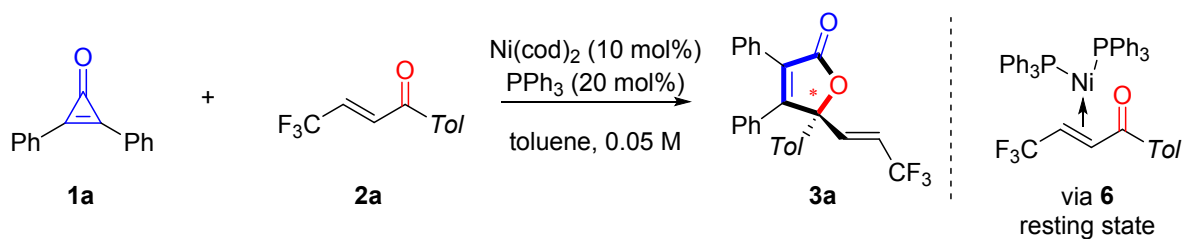

$\text{Ni}(\text{cod})_2$  (4.5 mg, 0.016 mmol, 0.08 equiv) and  $\text{PPh}_3$  (8.4 mg, 0.032 mmol, 0.016 equiv) in toluene (4.0 mL) were charged into a 25 mL pressure tube under the argon atmosphere. The mixture was stirred for 10 min at room temperature, followed by addition of  $\alpha, \beta$ -unsaturated ketone **2a** (42.0 mg, 0.2 mmol), and cyclopropenone **1a** (42.0 mg, 0.2 mmol) under argon. The conversion was measured by  $^{19}\text{F}$  NMR spectroscopy at the room temperature using 4-(trifluoromethyl)anisole as an internal standard. The concentration of the **6** didn't changed at the first 35 min.

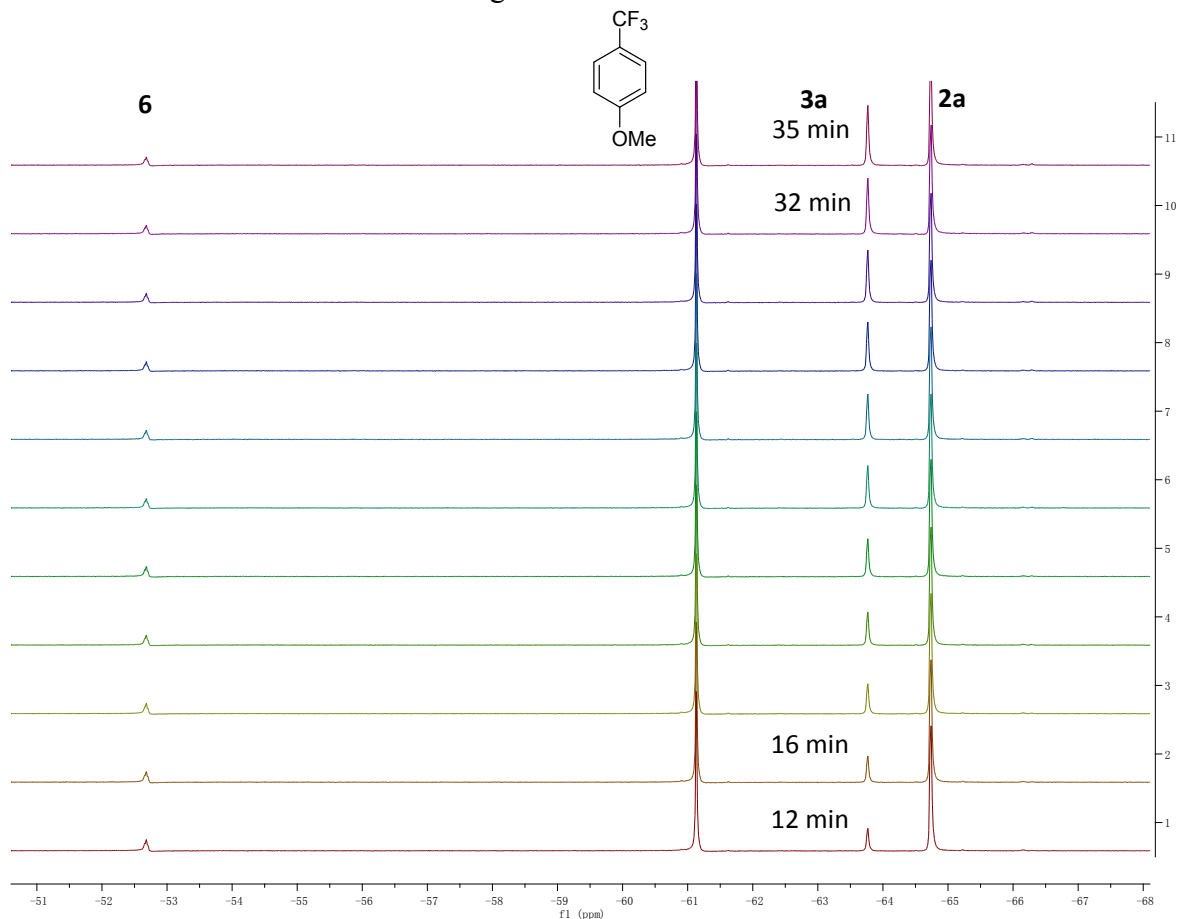

### 5.3 General procedure for the Hammett equation

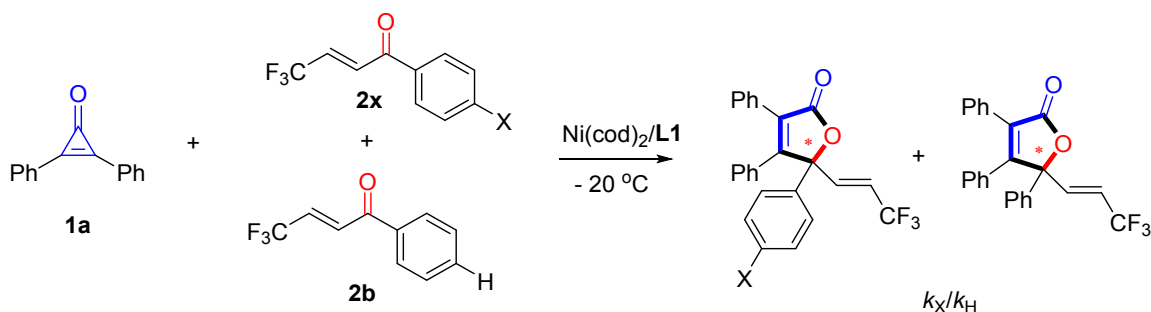

$\text{Ni}(\text{cod})_2$  (1.2 mg, 0.004 mmol, 0.02 equiv) and **L1** (2.7 mg, 0.008 mmol, 0.04 equiv) in toluene (2.0 mL) were charged into a 25 mL pressure tube under argon. The mixture was stirred for 10 min at room temperature, followed by addition of cyclopropenone **1a** (0.200 mmol, 1.0 equiv),  $\alpha, \beta$ -unsaturated ketone **2b** (0.10 mmol, 0.5 equiv), and a *para*-substituted  $\alpha, \beta$ -unsaturated ketone **2x** (0.10 mmol, 0.5 equiv). The reaction tube was then sealed and stirred at  $-20\text{ }^\circ\text{C}$  for 15 min. The reaction mixture was quickly filtered through a pad of celite and eluted with ethyl acetate. After the solvent was removed under reduced pressure, the residue sample was analyzed by GC/MS to determine ratio of  $k_X/k_H$  (all the reaction was purified and the yield of all the reaction was below 5%)

| X   | $\sigma_p$ | $k_X/k_H$ | $\text{Log}(k_X/k_H)$ |
|-----|------------|-----------|-----------------------|
| Me  | -0.17      | 39/61     | -0.194                |
| MeO | -0.27      | 27/73     | -0.431                |
| Cl  | 0.23       | 75/25     | 0.495                 |
| F   | 0.06       | 53/47     | 0.042                 |
| H   | 0          | 1         | 0                     |

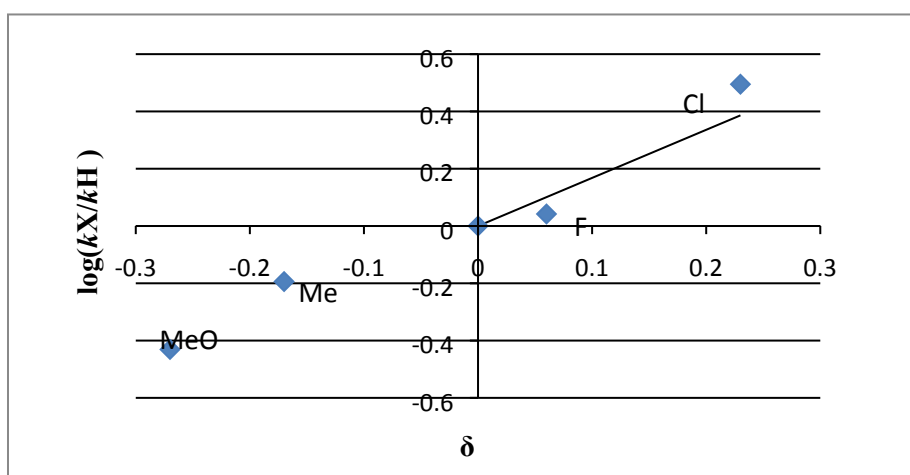

Figure S1. Hammett Plot

## 5.4 Kinetic Studies (Initial Rates)

### Plot of initial yield versus time under different [2a].

To a J-Young NMR tube were added the chiral catalyst Ni(cod)<sub>2</sub>/L1 (0.150 μmol: 0.03 mL of a 5 × 10<sup>-3</sup> mmol/mL stock solution in toluene) in toluene (0.6 mL), α, β-unsaturated ketone **2a** (2.1 mg, 0.01 mmol), and cyclopropenone **1a** (21.0 mg, 0.1 mmol) under argon. The NMR tube was shaken to ensure thorough mixing. The conversion was measured by <sup>19</sup>F NMR spectroscopy at the room temperature using 4-(trifluoromethyl)anisole as an internal standard. The concentrations of the products were plotted to yield the initial rates for the formation of **3a** (Figure S2). The same experimental procedure was repeated using 0.02, 0.03, 0.034, 0.04, 0.05, 0.06 mmol of **2a** under otherwise identical conditions, and their corresponding conversions were measured over time (Figure S2).

(a) Initial Rate = 2.36\*10<sup>-5</sup>M·min<sup>-1</sup>

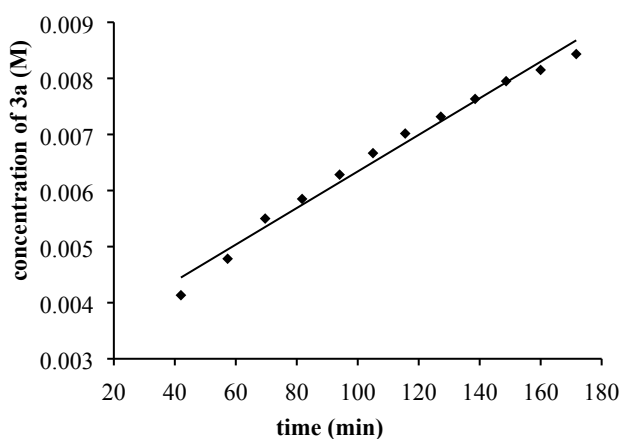

(b) Initial Rate = 2.66\*10<sup>-5</sup>M·min<sup>-1</sup>

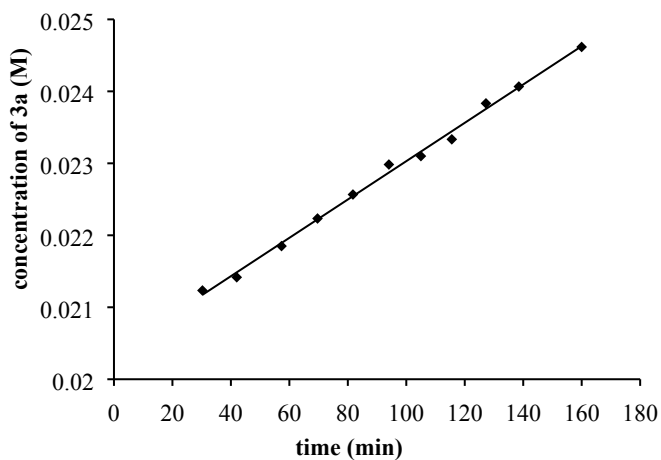

(c) Initial Rate = 3.30\*10<sup>-5</sup>M·min<sup>-1</sup>

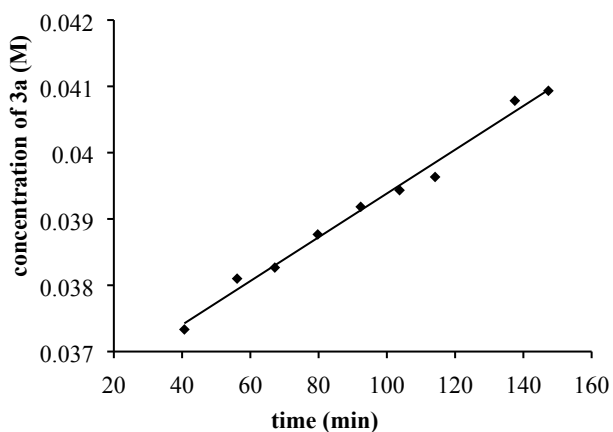

(d) Initial Rate = 2.40\*10<sup>-5</sup>M·min<sup>-1</sup>

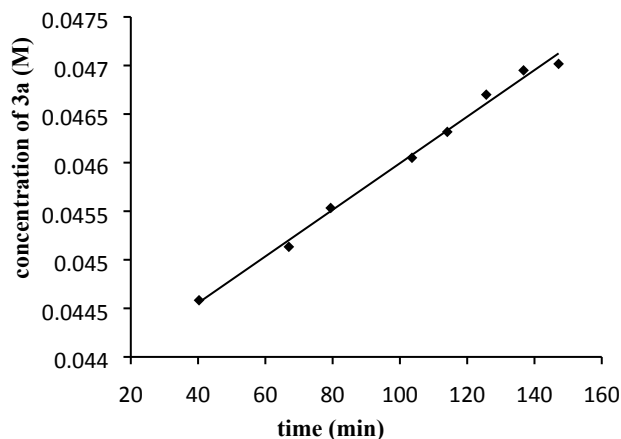

(e) Initial Rate = 3.49\*10<sup>-5</sup>M·min<sup>-1</sup>

(f) Initial Rate = 3.27\*10<sup>-5</sup>M·min<sup>-1</sup>

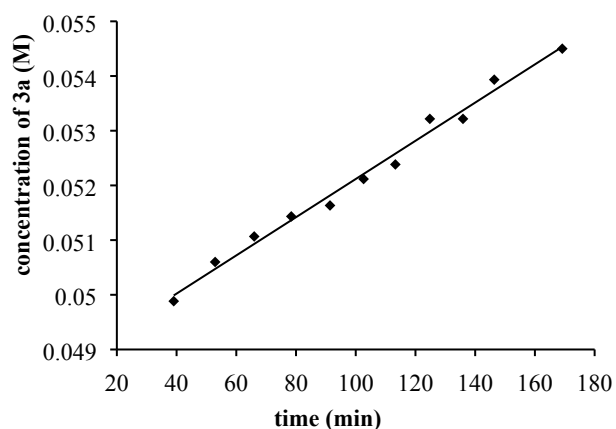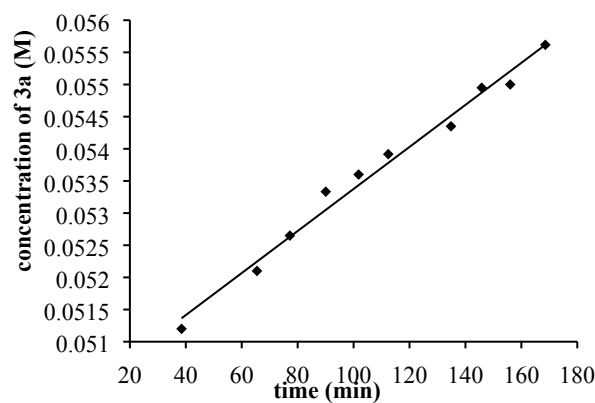

(g) Initial Rate =  $3.50 \times 10^{-5} \text{ M} \cdot \text{min}^{-1}$

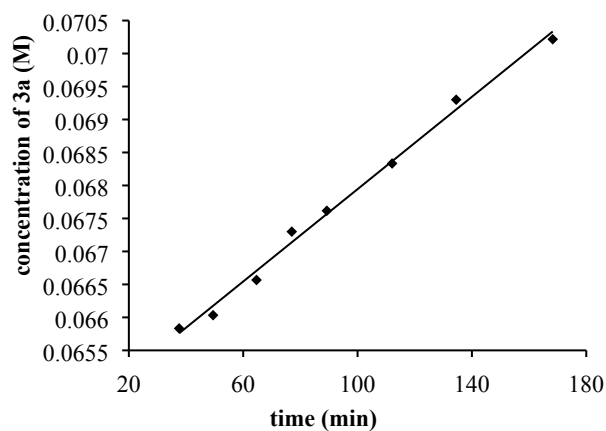

(h) Plot of Initial Rate vs [2a]

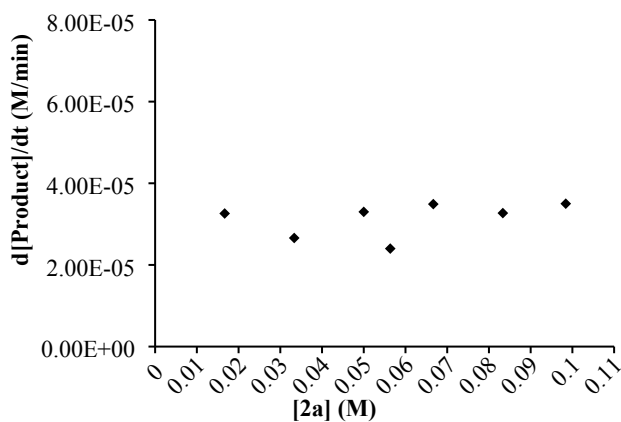

Figure S2. (a), (b), (c), (d), (e), (f), (g) initial rate for the formation of **3a** using 0.01, 0.02, 0.03, 0.034, 0.04, 0.05, 0.06 mmol of [**2a**], respectively. (h) plot of yield versus time with different [**2a**].

#### Plot of initial yield versus time with different [1a].

To a J-Young NMR tube were added under argon chiral catalyst  $\text{Ni}(\text{cod})_2/\text{L1}$  (0.20  $\mu\text{mol}$ , 0.04 mL of a  $5 \times 10^{-3}$  mmol/mL stock solution in toluene, Ni:L1 = 4:7) in toluene (0.6 mL),  $\alpha$ ,  $\beta$ -unsaturated ketone **2a** (21.0 mg, 0.1 mmol), and cyclopropanone **1a** (2.1 mg, 0.1 mmol). The NMR tube was shaken to ensure thorough mixing. The conversion was then measured by  $^{19}\text{F}$  NMR spectroscopy at room temperature using 4-(trifluoromethyl)anisole as an internal standard. The concentrations of the products were plotted to give the initial rates for the formation of **3a** (Figure S3). The same experimental procedure was repeated using 0.02, 0.034, 0.04, 0.05 mmol of **1a** under otherwise identical conditions, and their corresponding conversions were measured over time (Figure S3).

(a) Initial Rate =  $1.38 \times 10^{-5} \text{ M} \cdot \text{min}^{-1}$

(b) Initial Rate =  $5.76 \times 10^{-5} \text{ M} \cdot \text{min}^{-1}$

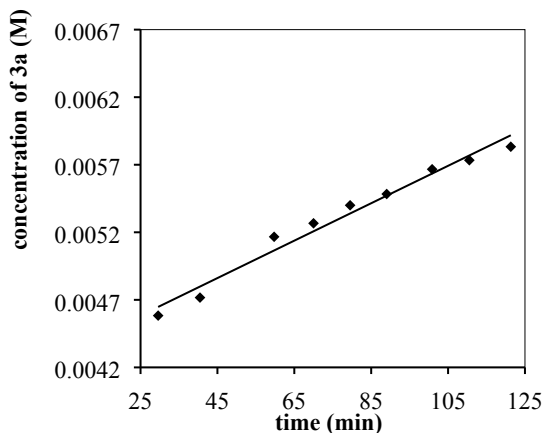

(c) Initial Rate =  $9.71 \times 10^{-5} \text{M} \cdot \text{min}^{-1}$

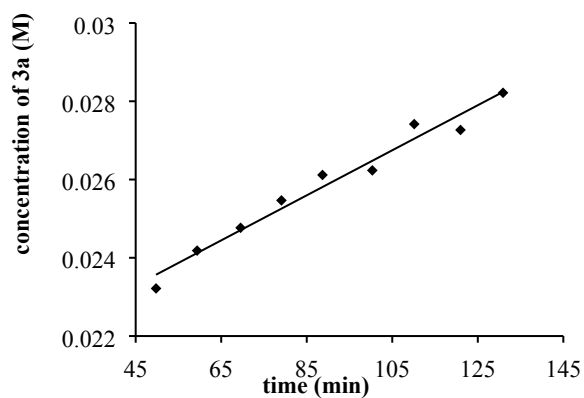

(d) Initial Rate =  $1.11 \times 10^{-4} \text{M} \cdot \text{min}^{-1}$

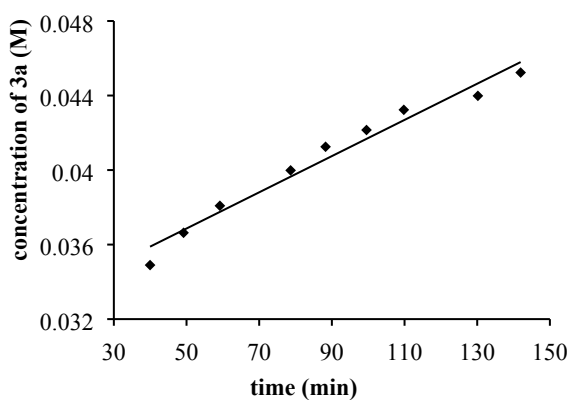

(e) Initial Rate =  $1.68 \times 10^{-4} \text{M} \cdot \text{min}^{-1}$

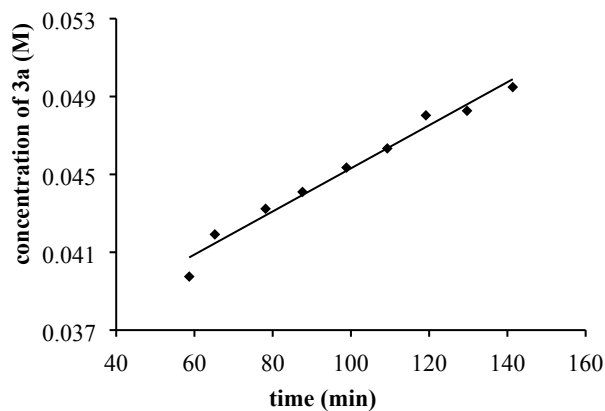

(f) Plot of Initial Rate vs  $[\mathbf{1a}]$

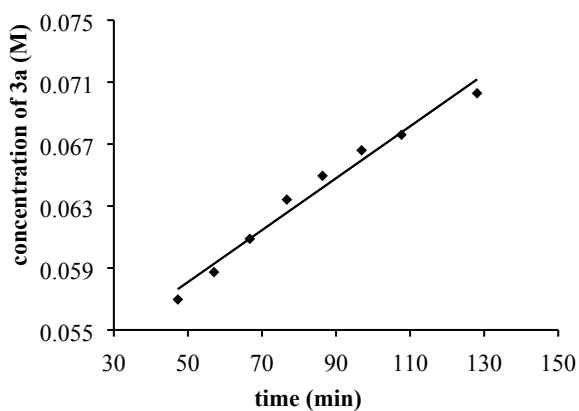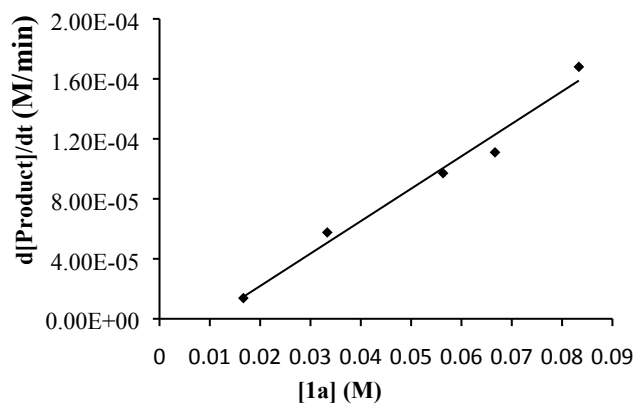

Figure S3. (a), (b), (c), (d), (e) initial rates for the formation of **3a** using 0.01, 0.02, 0.034, 0.04, 0.05 mmol of **[1a]**, respectively. (f) plot of yield versus time with different **[1a]**.

## 5.5 Kinetic Studies (Initial Rates) using PPh<sub>3</sub> as ligand.

### Plot of initial yield versus time under different [2a] using PPh<sub>3</sub> as ligand.

To a J-Young NMR tube were added the catalyst Ni(cod)<sub>2</sub>/PPh<sub>3</sub> (0.6 μmol: 0.03 mL of a 2 x 10<sup>-2</sup> mmol/mL stock solution in toluene, Ni/PPh<sub>3</sub> = 1/2) in toluene (0.5 mL), α, β-unsaturated ketone **2a** (5.3 mg, 0.025 mmol), and cyclopropenone **1a** (21.0 mg, 0.1 mmol) under argon. The NMR tube was shaken to ensure thorough mixing. The conversion was measured by <sup>19</sup>F NMR spectroscopy at the room temperature using 4-(trifluoromethyl)anisole as an internal standard. The concentrations of the products were plotted to yield the initial rates for the formation of **3a** (Figure S4). The same experimental procedure was repeated using 0.025, 0.03, 0.034, 0.04, 0.05 mmol of **2a** under otherwise identical conditions, and their corresponding conversions were measured over time (Figure S4).

(a) Initial Rate = 1.63\*10<sup>-5</sup>M·s<sup>-1</sup>

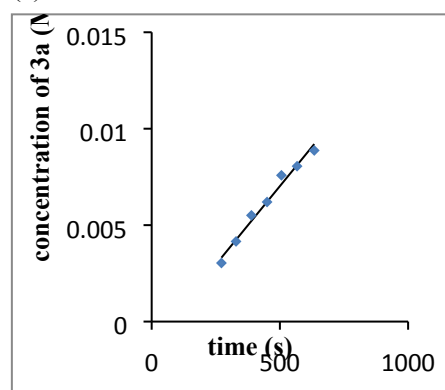

(b) Initial Rate = 1.56\*10<sup>-5</sup>M·s<sup>-1</sup>

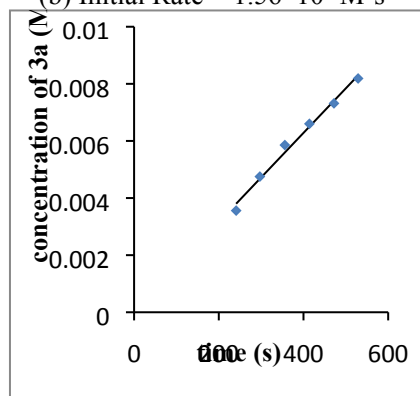

(c) Initial Rate = 1.89\*10<sup>-5</sup>M·s<sup>-1</sup>

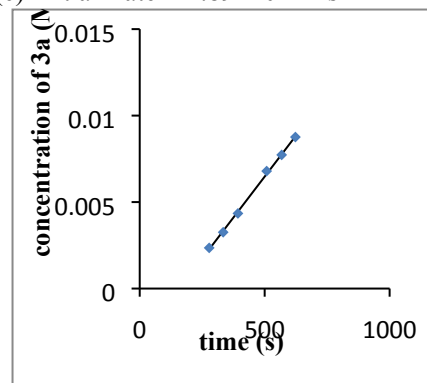

(d) Initial Rate = 1.83\*10<sup>-5</sup>M·s<sup>-1</sup>

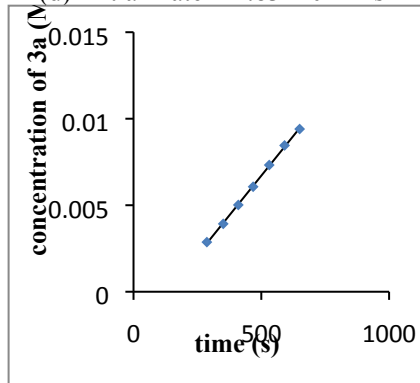

(e) Initial Rate = 1.99\*10<sup>-5</sup>M·s<sup>-1</sup>

(f) Plot of Initial Rate vs [2a]



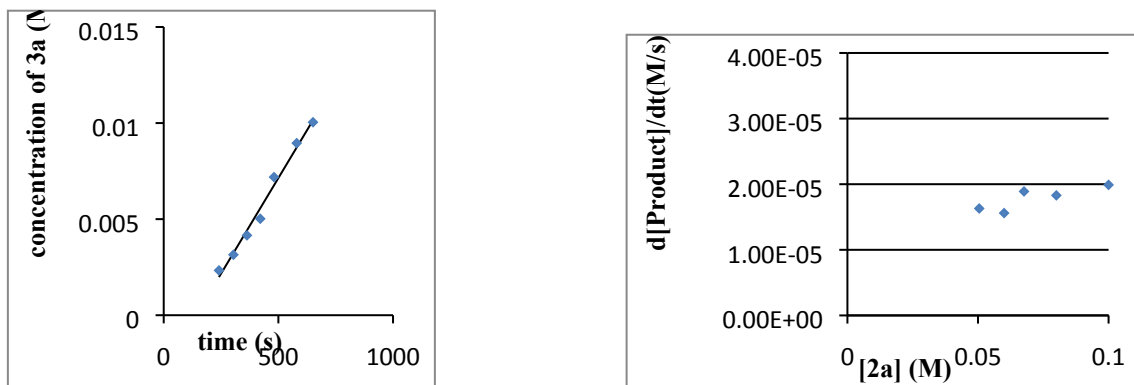

Figure S4. (a), (b), (c), (d), (e) initial rates for the formation of **3a** using 0.025, 0.03, 0.034, 0.04, 0.05 mmol of **2a**, respectively. (f) plot of yield versus time with different **2a**.

### Plot of initial yield versus time under different **1a** using $\text{PPh}_3$ as ligand.

To a J-Young NMR tube were added the catalyst  $\text{Ni}(\text{cod})_2/\text{PPh}_3$  (1.2  $\mu\text{mol}$ : 0.06 mL of a  $2 \times 10^{-2}$  mmol/mL stock solution in toluene,  $\text{Ni}/\text{PPh}_3 = 1/2$ ) in toluene (0.5 mL),  $\alpha$ ,  $\beta$ -unsaturated ketone **2a** (21.0 mg, 0.1 mmol), and cyclopropenone **1a** (2.1 mg, 0.01 mmol) under argon. The NMR tube was shaken to ensure thorough mixing. The conversion was measured by  $^{19}\text{F}$  NMR spectroscopy at the room temperature using 4-(trifluoromethyl)anisole as an internal standard. The concentrations of the products were plotted to yield the initial rates for the formation of **3a** (Figure S5). The same experimental procedure was repeated using 0.01, 0.02, 0.025, 0.03, 0.034, 0.04 mmol of **1a** under otherwise identical conditions, and their corresponding conversions were measured over time (Figure S5).

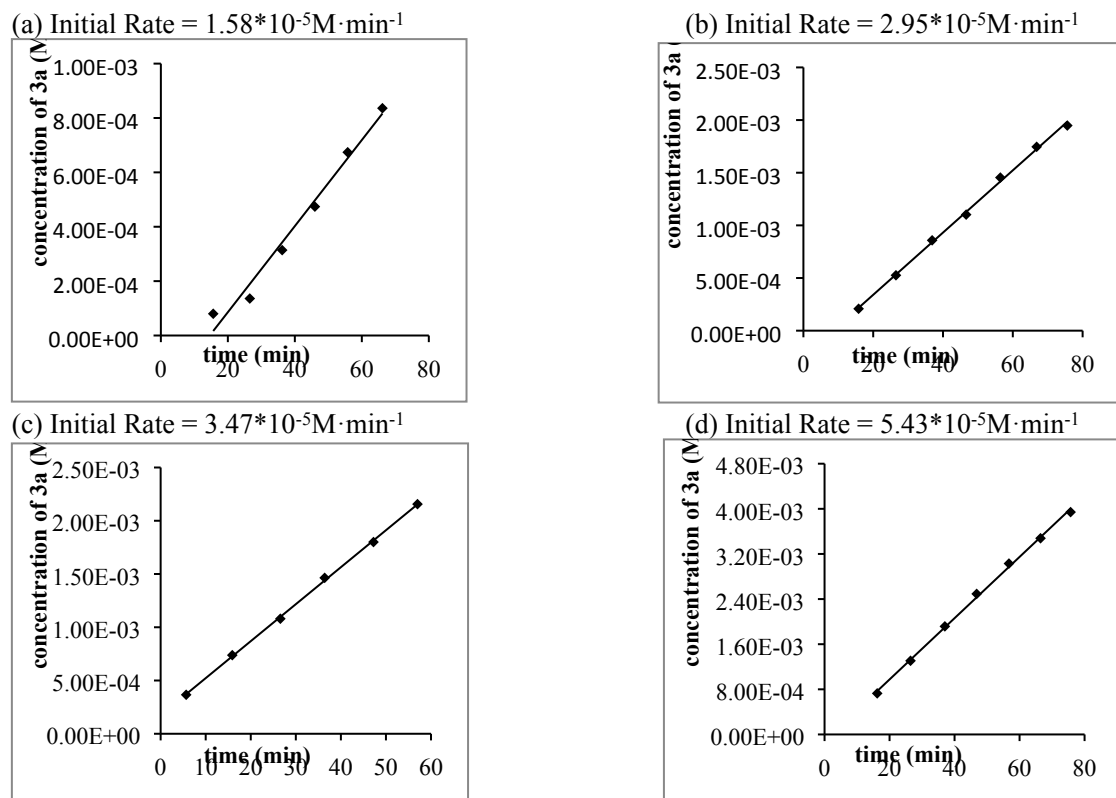

(e) Initial Rate =  $6.47 \times 10^{-5} \text{ M} \cdot \text{min}^{-1}$

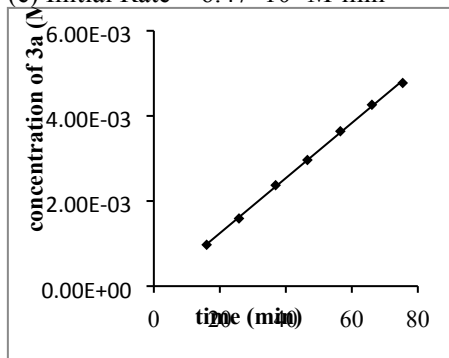

(f) Initial Rate =  $8.13 \times 10^{-5} \text{ M} \cdot \text{min}^{-1}$

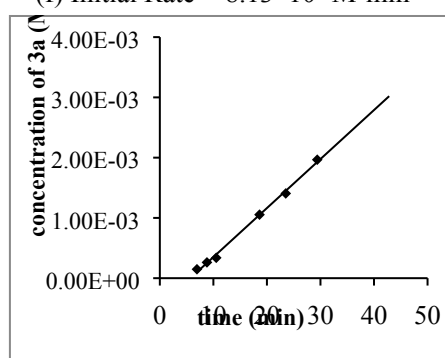

(g) Plot of Initial Rate vs [1a]

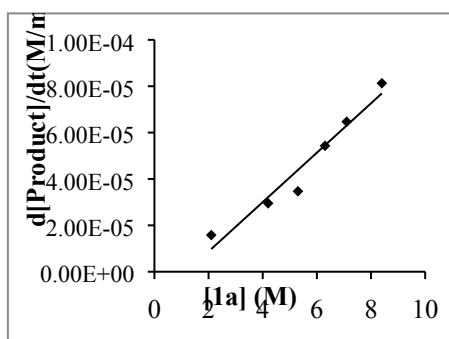

Figure S5. (a), (b), (c), (d), (e), (f) initial rate for the formation of **3a** using 0.01, 0.02, 0.025, 0.03, 0.034, 0.04 mmol of [**1a**], respectively. (h) plot of yield versus time with different [**1a**].

#### Plot of initial yield versus time under different [cat].

To a J-Young NMR tube were added the catalyst  $\text{Ni}(\text{cod})_2/\text{PPh}_3$  ( $x \times 2 \times 10^{-2} \mu\text{mol}$ :  $x \times 2 \times 10^{-2}$  mL of a  $2 \times 10^{-2}$  mmol/mL stock solution in toluene,  $\text{Ni}/\text{PPh}_3 = 1/2$ ) in toluene (0.5 mL),  $\alpha$ ,  $\beta$ -unsaturated ketone **1a** (10.5 mg, 0.05 mmol), and cyclopropenone **1a** (10.5 mg, 0.05 mmol) under argon. The NMR tube was shaken to ensure thorough mixing. The conversion was measured by  $^{19}\text{F}$  NMR spectroscopy at the room temperature using benzotrifluoride as an internal standard. The concentrations of the products were plotted to yield the initial rates for the formation of **3a** (Figure S6). The same experimental procedure was repeated using 30, 50, 60, 70, 80  $\mu\text{L}$  of *cat* under otherwise identical conditions, and their corresponding conversions were measured over time (Figure S6).

(a) Initial Rate =  $3.69 \times 10^{-6} \text{ M} \cdot \text{s}^{-1}$

(b) Initial Rate =  $5.00 \times 10^{-6} \text{ M} \cdot \text{s}^{-1}$

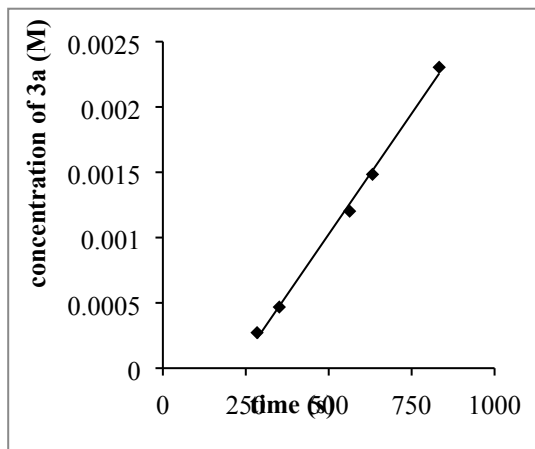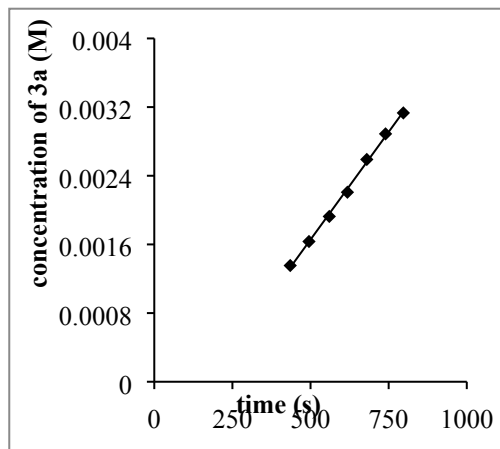

(c) Initial Rate =  $1.00 \cdot 10^{-5} \text{M} \cdot \text{s}^{-1}$

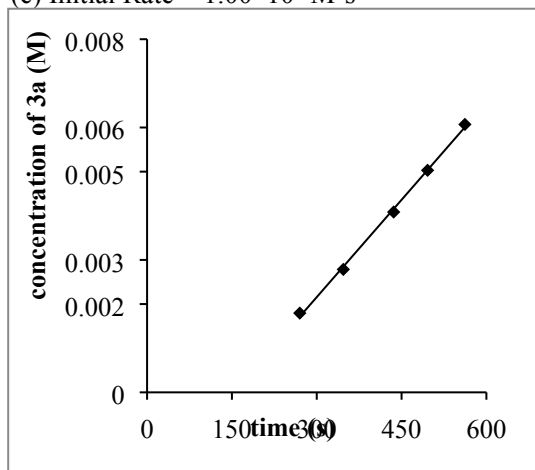

(d) Initial Rate =  $6.00 \cdot 10^{-6} \text{M} \cdot \text{s}^{-1}$

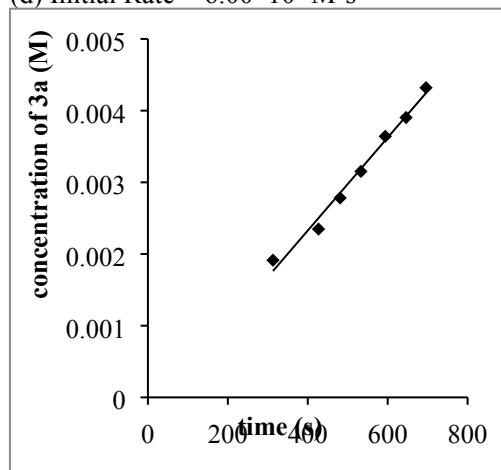

(e) Initial Rate =  $7.00 \cdot 10^{-6} \text{M} \cdot \text{s}^{-1}$

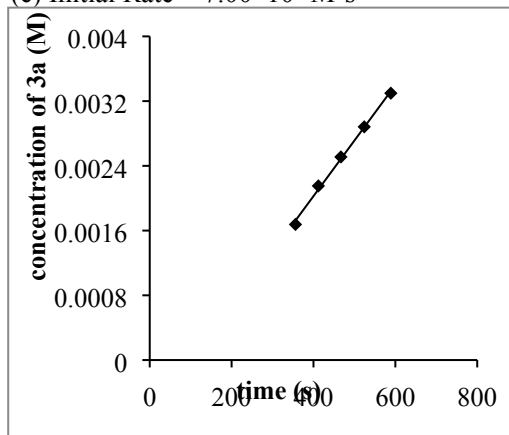

(f) Plot of Initial Rate vs [cat]

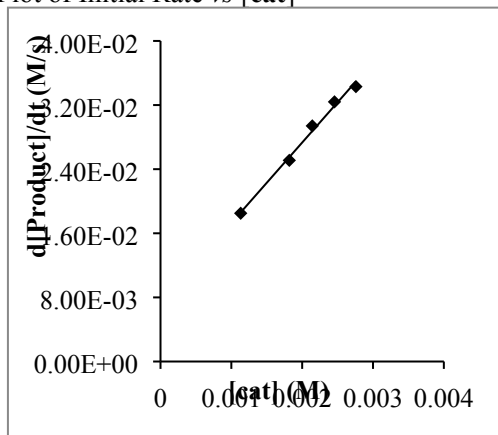

Figure S6. (a), (b), (c), (d), (e) initial rates for the formation of *cat* using  $1.13 \cdot 10^{-3}$ ,  $1.82 \cdot 10^{-3}$ ,  $2.14 \cdot 10^{-3}$ ,  $2.46 \cdot 10^{-3}$ ,  $2.76 \cdot 10^{-3}$  M of [cat]; 0.6, 1.0, 1.2, 1.4, 1.6  $\mu\text{mol}$  of [cat], respectively. (f) plot of yield versus time with different [cat].

## 6. Crystal structure details for **6** (CDCC 1962621)

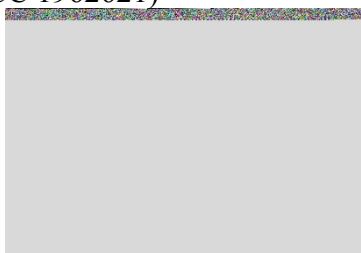

**Table 1 Crystal data and structure refinement for **6****

|                                             |                                                                  |
|---------------------------------------------|------------------------------------------------------------------|
| Identification code                         | <b>6</b>                                                         |
| Empirical formula                           | C <sub>47</sub> H <sub>39</sub> F <sub>3</sub> NiOP <sub>2</sub> |
| Formula weight                              | 797.43                                                           |
| Temperature/K                               | 284(1)                                                           |
| Crystal system                              | orthorhombic                                                     |
| Space group                                 | Pca2 <sub>1</sub>                                                |
| a/Å                                         | 28.4714(13)                                                      |
| b/Å                                         | 11.5708(5)                                                       |
| c/Å                                         | 12.0356(6)                                                       |
| α/°                                         | 90                                                               |
| β/°                                         | 90                                                               |
| γ/°                                         | 90                                                               |
| Volume/Å <sup>3</sup>                       | 3965.0(3)                                                        |
| Z                                           | 4                                                                |
| ρ <sub>calc</sub> /cm <sup>3</sup>          | 1.336                                                            |
| μ/mm <sup>-1</sup>                          | 0.620                                                            |
| F(000)                                      | 1656.0                                                           |
| Crystal size/mm <sup>3</sup>                | 0.32 × 0.26 × 0.25                                               |
| Radiation                                   | MoKα (λ = 0.71073)                                               |
| 2θ range for data collection/°              | 6.65 to 58.086                                                   |
| Index ranges                                | -38 ≤ h ≤ 37, -13 ≤ k ≤ 14, -13 ≤ l ≤ 16                         |
| Reflections collected                       | 20527                                                            |
| Independent reflections                     | 8151 [R <sub>int</sub> = 0.0340, R <sub>sigma</sub> = 0.0486]    |
| Data/restraints/parameters                  | 8151/1/488                                                       |
| Goodness-of-fit on F <sup>2</sup>           | 1.033                                                            |
| Final R indexes [I ≥ 2σ (I)]                | R <sub>1</sub> = 0.0380, wR <sub>2</sub> = 0.0691                |
| Final R indexes [all data]                  | R <sub>1</sub> = 0.0498, wR <sub>2</sub> = 0.0752                |
| Largest diff. peak/hole / e Å <sup>-3</sup> | 0.35/-0.23                                                       |
| Flack parameter                             | 0.002(7)                                                         |

Crystal structure details for **4c** (CDCC 2034194)

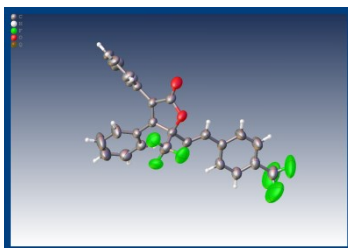

Table 1 Crystal data and structure refinement for **4c**.

|                                             |                                                               |
|---------------------------------------------|---------------------------------------------------------------|
| Identification code                         | <b>4c</b>                                                     |
| Empirical formula                           | C <sub>26</sub> H <sub>16</sub> F <sub>6</sub> O <sub>2</sub> |
| Formula weight                              | 474.39                                                        |
| Temperature/K                               | 293(2)                                                        |
| Crystal system                              | orthorhombic                                                  |
| Space group                                 | P2 <sub>1</sub> 2 <sub>1</sub> 2 <sub>1</sub>                 |
| a/Å                                         | 10.26200(10)                                                  |
| b/Å                                         | 10.3101(2)                                                    |
| c/Å                                         | 22.0678(3)                                                    |
| α/°                                         | 90                                                            |
| β/°                                         | 90                                                            |
| γ/°                                         | 90                                                            |
| Volume/Å <sup>3</sup>                       | 2334.82(6)                                                    |
| Z                                           | 4                                                             |
| ρ <sub>calc</sub> /cm <sup>3</sup>          | 1.350                                                         |
| μ/mm <sup>-1</sup>                          | 1.018                                                         |
| F(000)                                      | 968.0                                                         |
| Crystal size/mm <sup>3</sup>                | 0.13 × 0.05 × 0.05                                            |
| Radiation                                   | Cu Kα (λ = 1.54184)                                           |
| 2θ range for data collection/°              | 8.012 to 142.992                                              |
| Index ranges                                | -12 ≤ h ≤ 12, -12 ≤ k ≤ 12, -27 ≤ l ≤ 27                      |
| Reflections collected                       | 32602                                                         |
| Independent reflections                     | 4522 [R <sub>int</sub> = 0.0665, R <sub>sigma</sub> = 0.0297] |
| Data/restraints/parameters                  | 4522/42/335                                                   |
| Goodness-of-fit on F <sup>2</sup>           | 1.251                                                         |
| Final R indexes [I >= 2σ (I)]               | R <sub>1</sub> = 0.0720, wR <sub>2</sub> = 0.1840             |
| Final R indexes [all data]                  | R <sub>1</sub> = 0.0760, wR <sub>2</sub> = 0.1867             |
| Largest diff. peak/hole / e Å <sup>-3</sup> | 0.27/-0.46                                                    |
| Flack parameter                             | 0.01(6)                                                       |



## 7. Computational Studies

We also considered the possibility of coordination of another enone molecule into Ni(0) center in **CP2**. As shown in Figure S7, the coordination of another enone **1a** onto Ni(0) center gives complex **CP15** with 7.0 kcal/mol endergonicity. Therefore, **CP15** is not a constructive intermediate in the reaction pathway and won't kinetically affect the outcome in Figure 1.

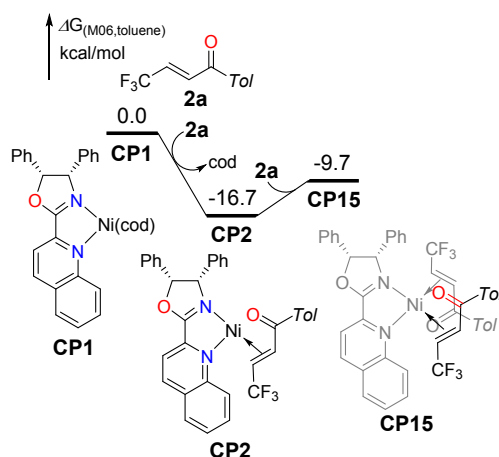

Figure S7. Free energy profile for the coordination of another molecular enone onto Ni(0) center in **CP2**.

A detailed computational study was performed to investigate the mechanism with  $\text{PPh}_3$  as ligand. The calculated Gibbs energy profiles for the pathway are given in Figure S8, where  $(\text{PPh}_3)_2\text{-Ni}(0)$  species **CP16** was set as the relative energy zero point. Ligand exchange of enone with cyclooctadiene in **CP16** gives olefin complex **CP17** with 17.6 kcal/mol exergonic. The cyclopropenone **1a** then coordinated to Ni(0) center to give **CP18** with 7.2 kcal/mol endergonic. The subsequent oxidative addition of cyclopropenone onto Ni(0) occurs via transition state **TS10** with an energy barrier of 17.1 kcal/mol, where the four-membered nickelacycle **CP19** was generated. The following 4,1-insertion of enone into the Ni-acyl bond gives the tethered allyl-Ni(II) intermediate **CP21** via transition state **TS11** with an overall activation free energy of 9.0 kcal/mol. The calculated results are consistent with kinetic studies and other experimental observations.

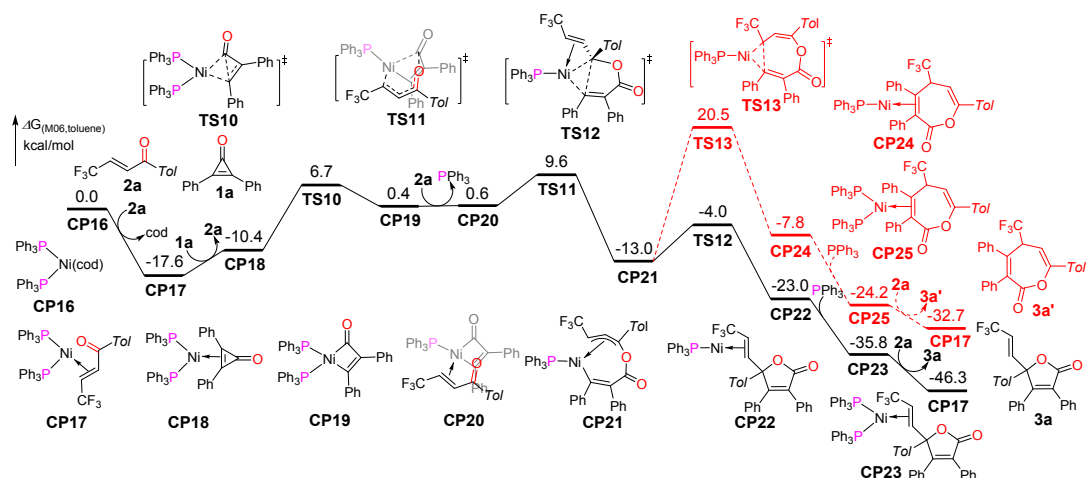

Figure S8. Free energy profiles for oxidation addition, 4,1-insertion and reductive elimination pathway of the Ni(0)-catalyzed [3+2] annulation reaction using PPh<sub>3</sub> as ligand.

Using PPh<sub>3</sub> as liand, the alternative oxidative cyclization pathway is ligand exchange of enone with PPh<sub>3</sub> give TS14 (Figure S9), while the energy barrier this pathway is higher than Figure S8, Therefore, this pathway can be excluded.

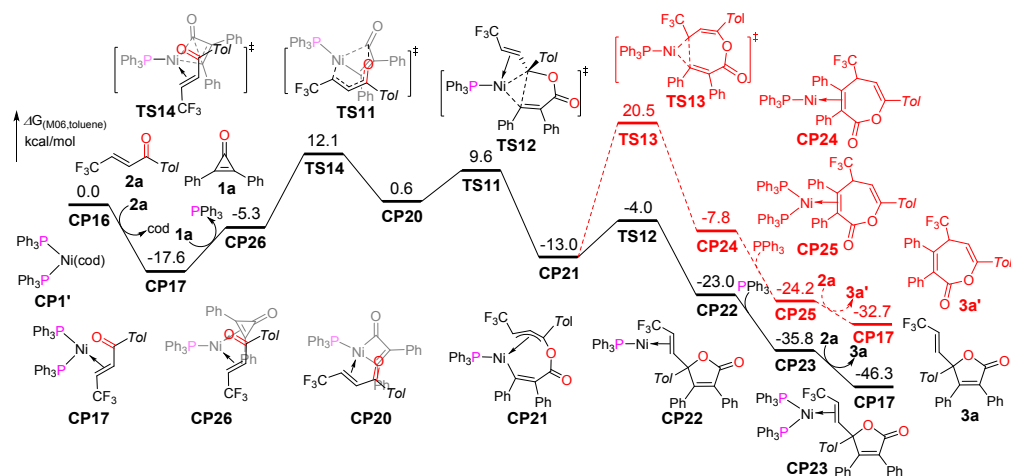

Figure S9. Free energy profiles for oxidation addition, 4,1-insertion and reductive elimination pathway of the Ni(0)-catalyzed [3+2] annulation reaction using PPh<sub>3</sub> as ligand.

## 7.1. Complete reference for Gaussian 09

Frisch, M. J.; Trucks, G. W.; Schlegel, H. B.; Scuseria, G. E.; Robb, M. A.; Cheeseman, J. R.; Scalmani, G.; Barone, V.; Mennucci, B.; Petersson, G. A.; Nakatsuji, H.; Caricato, M.; Li, X.; Hratchian, H. P.; Izmaylov, A. F.; Bloino, J.; Zheng, G.; Sonnenberg, J. L.; Hada, M.; Ehara, M.; Toyota, K.; Fukuda, R.; Hasegawa, J.; Ishida, M.; Nakajima, T.; Honda, Y.; Kitao, O.; Nakai, H.; Vreven, T.; Montgomery, Jr., J. A.; Peralta, J. E.; Ogliaro, F.; Bearpark, M.; Heyd, J. J.; Brothers, E.; Kudin, K. N.; Staroverov, V. N.;



Keith, T.; Kobayashi, R.; Normand, J.; Raghavachari, K.; Rendell, A.; Burant, J. C.; Iyengar, S. S.; Tomasi, J.; Cossi, M.; Rega, N.; Millam, J. M.; Klene, M.; Knox, J. E.; Cross, J. B.; Bakken, V.; Adamo, C.; Jaramillo, J.; Gomperts, R.; Stratmann, R. E.; Yazyev, O.; Austin, A. J.; Cammi, R.; Pomelli, C.; Ochterski, J. W.; Martin, R. L.; Morokuma, K.; Zakrzewski, V. G.; Voth, G. A.; Salvador, P.; Dannenberg, J. J.; Dapprich, S.; Daniels, A. D.; Farkas, O.; Foresman, J. B.; Ortiz, J. V.; Cioslowski, J.; and Fox, D. J. Gaussian 09, revision D.01; Gaussian, Inc.: Wallingford, CT, **2013**.

## 7.2. Computational Methods.

All DFT calculations were carried out with the GAUSSIAN 09 series of programs. Density functional B3-LYP<sup>4</sup> with a standard 6-31G(d) basis set (LANL08<sup>5</sup> basis set for Ni) was used for geometry optimizations. Harmonic frequency calculations were performed for all stationary points to confirm them as local minima or transition structures and to derive the thermochemical corrections for the enthalpies and free energies. All minima have zero imaginary frequency and all transition states have only one imaginary frequency. The solvent effects were considered by single point calculations on the gas-phase stationary points with a continuum solvation model SMD.<sup>6</sup> The DFT method M06<sup>7</sup> functional with the 6-311+G(d) (LANL08 basis set for Ni) basis set was used to calculate the single point energies with toluene as solvent and provide highly accurate energy information. The energies given in this report are the M06 calculated Gibbs free energies in toluene solvent. The optimized structures were displayed using CYLview.<sup>8</sup>

## 7.3. B3LYP and M06 absolute calculation energies, enthalpies, and free energies.

| Geometry   | E(elec-<br>B3LYP)1 | H(corr-<br>B3LYP)2 | G(corr-<br>B3LYP)3 | E(solv-M06)4 | IF5 |
|------------|--------------------|--------------------|--------------------|--------------|-----|
| <b>CP1</b> | -1591.501073       | 0.574479           | 0.480789           | -1590.824693 | -   |
| <b>2a</b>  | -799.318288        | 0.191592           | 0.132404           | -799.096300  | -   |
| <b>CP2</b> | -2078.824198       | 0.577876           | 0.464814           | -2078.103638 | -   |
| <b>cod</b> | -312.024465        | 0.189565           | 0.149672           | -311.845208  | -   |
| <b>1a</b>  | -652.765930        | 0.214776           | 0.162705           | -652.457266  | -   |
| <b>CP3</b> | -2731.579896       | 0.795298           | 0.649953           | -2730.563073 | -   |

|                   |              |          |          |              |        |
|-------------------|--------------|----------|----------|--------------|--------|
| <b>TS1</b>        | -2731.565424 | 0.793823 | 0.649065 | -2730.549716 | -104.8 |
| <b>CP4</b>        | -2731.594310 | 0.794985 | 0.649644 | -2730.570399 | -      |
| <b>TS2</b>        | -2731.575377 | 0.793249 | 0.651285 | -2730.548575 | -329.5 |
| <b>CP5</b>        | -2731.606188 | 0.795426 | 0.652157 | -2730.588284 | -      |
| <b>TS3</b>        | -2731.582320 | 0.793736 | 0.653302 | -2730.566445 | -281.2 |
| <b>CP6</b>        | -2731.652565 | 0.797056 | 0.657274 | -2730.625804 | -      |
| <b>3a</b>         | -1452.156178 | 0.411056 | 0.322259 | -1451.626350 | -      |
| <b>TS4</b>        | -2731.545376 | 0.793785 | 0.652404 | -2730.518093 | -249.2 |
| <b>CP7</b>        | -2731.622611 | 0.797135 | 0.655742 | -2730.600821 | -      |
| <b>3a'</b>        | -1452.138380 | 0.409965 | 0.325111 | -1451.607624 | -      |
| <b>TS2-R-exo</b>  | -2731.557674 | 0.793076 | 0.649718 | -2730.521715 | -408.9 |
| <b>TS2-S-endo</b> | -2731.573145 | 0.793199 | 0.650816 | -2730.542833 | -312.3 |
| <b>TS2-S-exo</b>  | -2731.556964 | 0.793185 | 0.650424 | -2730.518359 | -410.5 |
| <b>CP8</b>        | -1932.258321 | 0.601723 | 0.490907 | -1931.448877 | -      |
| <b>TS5</b>        | -1932.226200 | 0.599336 | 0.488894 | -1931.407488 | -161.3 |
| <b>CP9</b>        | -1932.27174  | 0.602373 | 0.491509 | -1931.444811 | -      |
| <b>CP10</b>       | -2731.558382 | 0.794842 | 0.646199 | -2730.527527 | -      |
| <b>TS6</b>        | -2731.550473 | 0.793657 | 0.648321 | -2730.511897 | -236.9 |
| <b>CP11</b>       | -2731.557742 | 0.793948 | 0.651175 | -2730.527085 | -      |
| <b>TS7</b>        | -2731.542213 | 0.793807 | 0.652650 | -2730.499212 | -29.9  |
| <b>TS8</b>        | -2078.786293 | 0.575338 | 0.46473  | -2078.058717 | -219.7 |
| <b>CP12</b>       | -2078.808108 | 0.577472 | 0.465551 | -2078.077425 | -      |
| <b>CP13</b>       | -2078.821815 | 0.577650 | 0.465144 | -2078.103358 | -      |
| <b>TS9</b>        | -2078.785117 | 0.575851 | 0.465864 | -2078.054453 | -158.0 |

|                        |              |          |          |              |        |
|------------------------|--------------|----------|----------|--------------|--------|
| <b>CP14</b>            | -2078.810141 | 0.577495 | 0.465794 | -2078.077051 | -      |
| <b>CP15</b>            | -2878.150680 | 0.771728 | 0.624646 | -2877.216269 | -      |
| <b>CP16</b>            | -2553.958637 | 0.777486 | 0.658102 | -2553.079283 | -      |
| <b>CP17</b>            | -3041.295449 | 0.781818 | 0.641735 | -3040.359378 | -      |
| <b>CP18</b>            | -2894.720005 | 0.805109 | 0.666769 | -2893.703602 | -      |
| <b>TS10</b>            | -2894.696661 | 0.803291 | 0.664912 | -2893.674485 | -172.0 |
| <b>CP19</b>            | -2894.718710 | 0.805217 | 0.667288 | -2893.686891 | -      |
| <b>CP20</b>            | -2657.765912 | 0.704562 | 0.568609 | -2656.886888 | -      |
| <b>PPh<sub>3</sub></b> | -1036.281644 | 0.291202 | 0.227665 | -1035.892574 | -      |
| <b>TS11</b>            | -2657.750428 | 0.703039 | 0.570775 | -2656.874641 | -286.6 |
| <b>CP21</b>            | -2657.783243 | 0.705544 | 0.576499 | -2656.916396 | -      |
| <b>TS12</b>            | -2657.764546 | 0.703673 | 0.573897 | -2656.899466 | -269.6 |
| <b>CP22</b>            | -2657.805825 | 0.705632 | 0.573223 | -2656.929144 | -      |
| <b>CP23</b>            | -3694.112605 | 1.000851 | 0.832901 | -3692.874036 | -      |
| <b>TS13</b>            | -2657.729598 | 0.703204 | 0.566240 | -2656.852755 | -305.3 |
| <b>CP24</b>            | -2657.781041 | 0.705706 | 0.574571 | -2656.906265 | -      |
| <b>CP25</b>            | -3694.088738 | 1.000635 | 0.829299 | -3692.851992 | -      |
| <b>CP26</b>            | -2657.758307 | 0.705145 | 0.569638 | -2656.897261 | -      |
| <b>TS14</b>            | -2657.741679 | 0.704135 | 0.572645 | -2656.872611 | -70.5  |

<sup>1</sup>The electronic energy calculated by B3LYP in gas phase. <sup>2</sup>The thermal correction to enthalpy calculated by B3LYP in gas phase. <sup>3</sup>The thermal correction to Gibbs free energy calculated by B3LYP in gas phase. <sup>4</sup>The electronic energy calculated by M06 in toluene solvent. <sup>5</sup>The B3LYP calculated imaginary frequencies for the transition states.

#### 7.4. B3LYP geometries for all the optimized compounds and transition states

|            |             |             |            |   |             |             |            |
|------------|-------------|-------------|------------|---|-------------|-------------|------------|
| <b>CP1</b> |             |             |            | C | -4.69239100 | -3.54492300 | 0.58078100 |
| C          | -5.54494600 | -1.30256100 | 0.83862400 | C | -5.75211300 | -2.69738400 | 0.83678900 |
| C          | -4.29345500 | -0.77780400 | 0.57783500 | H | -6.37496000 | -0.63374300 | 1.05039700 |
| C          | -3.19137800 | -1.61896400 | 0.30011500 | H | -4.12227900 | 0.28956900  | 0.58488300 |
| C          | -3.39893800 | -3.03711100 | 0.31299800 | C | -2.28586500 | -3.89382400 | 0.06388400 |

|           |             |             |             |            |             |             |             |
|-----------|-------------|-------------|-------------|------------|-------------|-------------|-------------|
| H         | -4.83542700 | -4.62307500 | 0.58247000  | H          | 2.60757400  | 1.60239500  | 0.14931300  |
| H         | -6.73958800 | -3.10171500 | 1.04114100  | C          | 1.18845900  | 0.05657800  | -0.03992700 |
| C         | -1.06029300 | -3.33775300 | -0.17574400 | H          | 1.03044800  | -1.00952300 | -0.15146600 |
| C         | -0.92788700 | -1.92638400 | -0.18047800 | C          | 3.65225600  | -0.32600800 | -0.00590300 |
| H         | -2.42725500 | -4.97113600 | 0.06902700  | F          | 3.36516400  | -1.63481900 | -0.16971600 |
| H         | -0.18111200 | -3.94228400 | -0.37177600 | F          | 4.46187200  | 0.04405100  | -1.02262300 |
| N         | -1.95289000 | -1.05526800 | 0.04185800  | F          | 4.36711900  | -0.20635600 | 1.13512500  |
| C         | 2.39734200  | -1.00357300 | -1.21436900 | C          | 0.01784300  | 0.99147500  | 0.01307600  |
| C         | 1.79576300  | 0.37621800  | -0.73383900 | O          | 0.20887200  | 2.20267800  | 0.06086800  |
| C         | 0.31665600  | -1.27661300 | -0.45206000 | C          | -1.36629500 | 0.43363300  | 0.00317500  |
| N         | 0.38041200  | 0.02271200  | -0.52985800 | C          | -1.66111900 | -0.93759400 | 0.04505700  |
| O         | 1.47260100  | -1.97079200 | -0.65178600 | C          | -2.43619200 | 1.34696800  | -0.03750400 |
| H         | 2.27626300  | -1.05042500 | -2.30542200 | C          | -2.98421700 | -1.37816000 | 0.04469100  |
| H         | 1.87772300  | 1.09710600  | -1.55300000 | H          | -0.87001100 | -1.67849600 | 0.08926000  |
| C         | 2.43943000  | 0.98140600  | 0.50392500  | C          | -3.74983200 | 0.90166300  | -0.04209600 |
| C         | 2.07556100  | 0.58230900  | 1.79658500  | H          | -2.20365900 | 2.40629400  | -0.06456800 |
| C         | 3.44671200  | 1.94297500  | 0.35484900  | C          | -4.04968200 | -0.47157100 | -0.00156300 |
| C         | 2.71035700  | 1.12958700  | 2.91270400  | H          | -3.19135900 | -2.44473100 | 0.08174000  |
| H         | 1.27907400  | -0.14327300 | 1.93054500  | H          | -4.56198000 | 1.62440400  | -0.07613900 |
| C         | 4.08465500  | 2.48978600  | 1.46899500  | C          | -5.48267700 | -0.94547600 | -0.01176100 |
| H         | 3.73539600  | 2.26611100  | -0.64297300 | H          | -5.54807100 | -2.03309400 | 0.08849100  |
| C         | 3.71784400  | 2.08337800  | 2.75310400  | H          | -6.05542400 | -0.49519800 | 0.80811900  |
| H         | 2.41258300  | 0.81334400  | 3.90902100  | H          | -5.98543200 | -0.66381700 | -0.94561700 |
| H         | 4.86256500  | 3.23650700  | 1.33330200  |            |             |             |             |
| H         | 4.20872300  | 2.51119200  | 3.62310800  | <b>CP2</b> |             |             |             |
| C         | 3.82002600  | -1.33612000 | -0.85554200 | C          | -6.09475500 | -0.47175400 | -0.27620200 |
| C         | 4.84547700  | -0.97704300 | -1.73924100 | C          | -4.73331200 | -0.29162400 | -0.17329500 |
| C         | 4.14967400  | -1.97606400 | 0.34525500  | C          | -3.84460100 | -1.30116100 | -0.61930500 |
| C         | 6.17979300  | -1.23455100 | -1.42290300 | C          | -4.38774200 | -2.51444200 | -1.16773500 |
| H         | 4.59821800  | -0.49802200 | -2.68466300 | C          | -5.79591900 | -2.66246100 | -1.25961900 |
| C         | 5.48287500  | -2.24373400 | 0.65653100  | C          | -6.63379500 | -1.66073100 | -0.82559600 |
| H         | 3.35909100  | -2.27438700 | 1.02520800  | H          | -6.76396700 | 0.30929600  | 0.07263900  |
| C         | 6.50184100  | -1.87007500 | -0.22241900 | H          | -4.31527900 | 0.60515000  | 0.26039700  |
| H         | 6.96442800  | -0.94968800 | -2.11872400 | C          | -3.49216100 | -3.52325000 | -1.59654700 |
| H         | 5.72582900  | -2.74621100 | 1.58901000  | H          | -6.19700600 | -3.58151700 | -1.67913600 |
| H         | 7.53942900  | -2.07969800 | 0.02320300  | H          | -7.71088500 | -1.78051300 | -0.89952300 |
| Ni        | -1.40199100 | 0.88695300  | -0.28631100 | C          | -2.13798400 | -3.31754900 | -1.48531600 |
| C         | -0.85792200 | 2.72088700  | 0.51328600  | C          | -1.68797800 | -2.09589900 | -0.94475100 |
| C         | -2.03684300 | 2.30696500  | 1.13208500  | H          | -3.88511100 | -4.44737400 | -2.01195100 |
| C         | -3.41400500 | 2.83220000  | 0.76736700  | H          | -1.41068300 | -4.05498100 | -1.80527700 |
| C         | -3.70190000 | 2.78207600  | -0.75941700 | N          | -2.48933900 | -1.10725700 | -0.51591700 |
| C         | -2.91151800 | 1.70012600  | -1.49056000 | C          | 1.94221400  | -1.92024200 | -1.10824200 |
| C         | -1.66706200 | 1.90184000  | -2.08564000 | C          | 1.56528900  | -0.62548500 | -0.28044500 |
| C         | -0.84506500 | 3.17500300  | -2.00694800 | C          | -0.26942700 | -1.77612600 | -0.82113300 |
| C         | -0.79345800 | 3.78206700  | -0.57947900 | N          | 0.09744900  | -0.61370400 | -0.40763100 |
| H         | 0.07495200  | 2.51435200  | 1.03176000  | O          | 0.68170100  | -2.67478800 | -1.12610000 |
| H         | -1.95554400 | 1.82159700  | 2.10426700  | H          | 2.11649400  | -1.61550000 | -2.14661700 |
| H         | -3.55111300 | 3.86212800  | 1.13660200  | H          | 1.97244400  | 0.24997200  | -0.79280400 |
| H         | -4.16233400 | 2.23417700  | 1.30063200  | C          | 2.02073100  | -0.58859300 | 1.16977000  |
| H         | -4.77407800 | 2.61322100  | -0.91907300 | C          | 1.21618700  | -1.05277900 | 2.21719600  |
| H         | -3.48853400 | 3.75761500  | -1.21120700 | C          | 3.29621600  | -0.08849500 | 1.46641200  |
| H         | -3.48368800 | 0.84010800  | -1.83446900 | C          | 1.68160700  | -1.02402500 | 3.53383500  |
| H         | -1.36285700 | 1.19852600  | -2.86029600 | H          | 0.21382000  | -1.41464100 | 2.01116000  |
| H         | -1.20765400 | 3.93052100  | -2.72423400 | C          | 3.76447700  | -0.06656600 | 2.77967400  |
| H         | 0.17648100  | 2.92984300  | -2.32467600 | H          | 3.92366300  | 0.29038500  | 0.66355000  |
| H         | 0.13267600  | 4.35980800  | -0.47075700 | C          | 2.95690200  | -0.53509100 | 3.81867800  |
| H         | -1.60853400 | 4.50340600  | -0.44873800 | H          | 1.04057700  | -1.37741000 | 4.33687200  |
|           |             |             |             | H          | 4.75631300  | 0.32332800  | 2.99238900  |
| <b>2a</b> |             |             |             | H          | 3.31659500  | -0.51041200 | 4.84371300  |
| C         | 2.43137700  | 0.53590000  | 0.04089600  | C          | 3.07728700  | -2.78781500 | -0.64125100 |

|           |             |             |             |            |             |             |             |
|-----------|-------------|-------------|-------------|------------|-------------|-------------|-------------|
| C         | 4.33026400  | -2.65027200 | -1.25030100 | H          | -5.28546100 | 0.75903600  | -0.00001000 |
| C         | 2.92055000  | -3.71500600 | 0.39699700  | H          | -3.27357400 | -3.04710400 | 0.00001600  |
| C         | 5.41666700  | -3.41336300 | -0.81966600 | H          | -5.37747500 | -1.72544600 | 0.00000500  |
| H         | 4.45678100  | -1.94487200 | -2.06891500 |            |             |             |             |
| C         | 4.00277800  | -4.48606700 | 0.81869300  | <b>CP3</b> |             |             |             |
| H         | 1.95037300  | -3.83723100 | 0.86694000  | C          | -0.37836100 | 6.09980600  | 1.44101500  |
| C         | 5.25403800  | -4.33472000 | 0.21568900  | C          | -0.40803600 | 4.73703500  | 1.24983300  |
| H         | 6.38367800  | -3.29555600 | -1.30083200 | C          | -1.41875200 | 4.16134600  | 0.43089800  |
| H         | 3.86899600  | -5.20573100 | 1.62165900  | C          | -2.40847600 | 5.01223500  | -0.16906800 |
| H         | 6.09567200  | -4.93634800 | 0.54781300  | C          | -2.34038800 | 6.41273800  | 0.04733800  |
| Ni        | -1.41490000 | 0.56327500  | 0.00794200  | C          | -1.34265900 | 6.94423400  | 0.83304900  |
| C         | -2.29142400 | 2.21869300  | 0.52076300  | H          | 0.39029300  | 6.53712200  | 2.07199000  |
| H         | -2.94593100 | 2.66425800  | -0.22838400 | H          | 0.30136400  | 4.07609400  | 1.73740500  |
| C         | -0.86954000 | 2.39525100  | 0.33242700  | C          | -3.41705600 | 4.39739900  | -0.95034900 |
| H         | -0.23221500 | 2.48579000  | 1.20841700  | H          | -3.08803000 | 7.05391500  | -0.41329500 |
| C         | -2.82231100 | 2.35140100  | 1.90293100  | H          | -1.29449300 | 8.01736300  | 0.99688100  |
| F         | -2.82008700 | 3.63187000  | 2.36759800  | C          | -3.42337000 | 3.03210100  | -1.10618100 |
| F         | -4.12038500 | 1.93389000  | 2.00096200  | C          | -2.39112500 | 2.28187800  | -0.48447700 |
| F         | -2.11515500 | 1.62735400  | 2.81442900  | H          | -4.18140000 | 5.01322900  | -1.41817700 |
| C         | -0.38100600 | 2.94771200  | -0.94423400 | H          | -4.18110100 | 2.52469000  | -1.69113500 |
| O         | -1.13515500 | 3.15925000  | -1.89874100 | N          | -1.42633300 | 2.81324800  | 0.25025500  |
| C         | 1.09345800  | 3.24121300  | -1.11189300 | C          | -3.03168300 | -1.14527900 | -1.46487400 |
| C         | 2.05340700  | 3.07719600  | -0.10291700 | C          | -1.90180500 | -1.35450500 | -0.40394700 |
| C         | 1.52211300  | 3.72369800  | -2.35949900 | C          | -2.35869200 | 0.81456800  | -0.62589000 |
| C         | 3.39501300  | 3.38684900  | -0.33790900 | N          | -1.39934000 | 0.03488300  | -0.25868600 |
| H         | 1.76921000  | 2.70039400  | 0.87371800  | O          | -3.44202700 | 0.23300100  | -1.18755600 |
| C         | 2.85842600  | 4.03046300  | -2.58910500 | H          | -2.55036200 | -1.12726100 | -2.45022800 |
| H         | 0.77434800  | 3.85053200  | -3.13551400 | H          | -1.11891500 | -1.97719400 | -0.83638300 |
| C         | 3.82173400  | 3.87244900  | -1.57972700 | C          | -2.36967800 | -1.94474600 | 0.91679800  |
| H         | 4.11987400  | 3.25529100  | 0.46284800  | C          | -2.94224500 | -1.16357000 | 1.92884700  |
| H         | 3.16425000  | 4.40213900  | -3.56526200 | C          | -2.29603000 | -3.33192100 | 1.09742600  |
| C         | 5.26657400  | 4.24065000  | -1.82294800 | C          | -3.44749000 | -1.76062700 | 3.08512400  |
| H         | 5.92707000  | 3.79877400  | -1.06953100 | H          | -2.97958500 | -0.08342000 | 1.82796700  |
| H         | 5.60606300  | 3.90681600  | -2.81046200 | C          | -2.80108000 | -3.93001500 | 2.25139500  |
| H         | 5.40972000  | 5.32890900  | -1.78620000 | H          | -1.84396300 | -3.94860800 | 0.32428300  |
|           |             |             |             | C          | -3.38407500 | -3.14512700 | 3.24783900  |
| <b>1a</b> |             |             |             | H          | -3.88549000 | -1.13936100 | 3.86197100  |
| C         | 0.68597200  | 0.81873500  | -0.00000300 | H          | -2.73463600 | -5.00779600 | 2.37342700  |
| C         | -0.68597200 | 0.81873500  | -0.00000300 | H          | -3.77707600 | -3.60855500 | 4.14891300  |
| C         | 0.00000000  | 2.07497600  | -0.00000200 | C          | -4.21432900 | -2.07116200 | -1.48797000 |
| O         | 0.00000000  | 3.29281100  | 0.00000400  | C          | -4.19422200 | -3.16570500 | -2.36162900 |
| C         | 1.93801000  | 0.09238400  | -0.00000200 | C          | -5.32468600 | -1.88271700 | -0.65556300 |
| C         | 3.13613400  | 0.83246700  | 0.00000600  | C          | -5.25699100 | -4.06945100 | -2.39186300 |
| C         | 2.00143800  | -1.31341400 | -0.00000900 | H          | -3.34338200 | -3.30816400 | -3.02453700 |
| C         | 4.36625600  | 0.17998300  | 0.00000700  | C          | -6.39188200 | -2.77954300 | -0.69487900 |
| H         | 3.08265800  | 1.91725900  | 0.00001100  | H          | -5.35299700 | -1.03087800 | 0.01500400  |
| C         | 3.23339800  | -1.96126500 | -0.00000800 | C          | -6.36023400 | -3.87677000 | -1.55871200 |
| H         | 1.08364700  | -1.89310500 | -0.00001600 | H          | -5.22751100 | -4.91461800 | -3.07423700 |
| C         | 4.41724700  | -1.21669200 | 0.00000000  | H          | -7.25046000 | -2.62078300 | -0.04796400 |
| H         | 5.28546100  | 0.75903600  | 0.00001400  | H          | -7.19356900 | -4.57366600 | -1.58659400 |
| H         | 3.27357400  | -3.04710400 | -0.00001400 | Ni         | 0.54669300  | 0.65102100  | -0.03114300 |
| H         | 5.37747500  | -1.72544600 | 0.00000100  | C          | 1.00325000  | 0.10055300  | 1.87207500  |
| C         | -1.93801000 | 0.09238400  | -0.00000100 | C          | 1.99398000  | 0.98370400  | 1.21781400  |
| C         | -3.13613400 | 0.83246700  | -0.00000700 | C          | 1.09701800  | 1.46008900  | 2.27964000  |
| C         | -2.00143800 | -1.31341400 | 0.00000700  | O          | 0.83602600  | 2.33870600  | 3.08269400  |
| C         | -4.36625600 | 0.17998300  | -0.00000500 | C          | 0.92988300  | -1.21785700 | 2.50830000  |
| H         | -3.08265800 | 1.91725900  | -0.00001300 | C          | 1.45104800  | -2.36807300 | 1.88753900  |
| C         | -3.23339800 | -1.96126500 | 0.00000900  | C          | 0.36184000  | -1.33701600 | 3.78905800  |
| H         | -1.08364700 | -1.89310500 | 0.00001300  | C          | 1.41779800  | -3.59977400 | 2.53886100  |
| C         | -4.41724700 | -1.21669200 | 0.00000300  | H          | 1.89077500  | -2.28876500 | 0.89706100  |

|            |             |             |             |    |             |             |             |
|------------|-------------|-------------|-------------|----|-------------|-------------|-------------|
| C          | 0.33222400  | -2.57070800 | 4.43679600  | C  | -2.16730100 | -1.40675900 | -0.82565100 |
| H          | -0.04018400 | -0.45021100 | 4.26995700  | C  | -2.79209800 | 0.66198300  | -0.21428900 |
| C          | 0.86095900  | -3.70525700 | 3.81625800  | N  | -1.73746600 | -0.03854100 | -0.44145800 |
| H          | 1.83022000  | -4.47850400 | 2.04939900  | O  | -3.98224700 | 0.05458300  | -0.44080300 |
| H          | -0.10412500 | -2.64669200 | 5.42926600  | H  | -3.73050900 | -0.88639400 | -2.24347300 |
| H          | 0.83797000  | -4.66596500 | 4.32401000  | H  | -1.62306400 | -1.70260200 | -1.72511800 |
| C          | 3.46497900  | 1.00722200  | 1.07602000  | C  | -1.89154400 | -2.44277900 | 0.24971600  |
| C          | 4.10809800  | 2.07523200  | 0.42376100  | C  | -2.14225000 | -2.19871700 | 1.60644400  |
| C          | 4.25901800  | -0.00904500 | 1.63833500  | C  | -1.42071600 | -3.70348500 | -0.13812700 |
| C          | 5.49916900  | 2.11704400  | 0.32786900  | C  | -1.94591200 | -3.20788400 | 2.55010000  |
| H          | 3.50936700  | 2.86736700  | -0.01156200 | H  | -2.44928800 | -1.21197000 | 1.93640700  |
| C          | 5.65069500  | 0.04243300  | 1.55035900  | C  | -1.22573200 | -4.71240800 | 0.80603800  |
| H          | 3.78057400  | -0.83755900 | 2.15067500  | H  | -1.19310200 | -3.89089200 | -1.18431400 |
| C          | 6.27739900  | 1.10208400  | 0.89039800  | C  | -1.49471600 | -4.46854200 | 2.15346400  |
| H          | 5.97615800  | 2.94981100  | -0.18253800 | H  | -2.14256200 | -3.00434700 | 3.59959600  |
| H          | 6.24550900  | -0.74810000 | 2.00126700  | H  | -0.85685900 | -5.68413100 | 0.48868000  |
| H          | 7.36127200  | 1.14031000  | 0.82040300  | H  | -1.34159700 | -5.25149900 | 2.89155800  |
| C          | 0.66553700  | 1.30943500  | -1.96960500 | C  | -4.68371100 | -2.24390400 | -0.89882000 |
| H          | -0.20117900 | 0.95624600  | -2.51923200 | C  | -4.93585900 | -3.20357800 | -1.88712300 |
| C          | 1.68277400  | 0.38718500  | -1.69631400 | C  | -5.36344100 | -2.32682600 | 0.32172500  |
| H          | 2.69027400  | 0.73974600  | -1.51273500 | C  | -5.83966300 | -4.24043000 | -1.65518300 |
| C          | 0.95068900  | 2.76396100  | -2.18078700 | H  | -4.42517600 | -3.13738800 | -2.84561100 |
| F          | 1.53353400  | 3.37265100  | -1.11805000 | C  | -6.27629100 | -3.35714500 | 0.54901700  |
| F          | 1.78446600  | 2.96665800  | -3.23474800 | H  | -5.18431300 | -1.57801700 | 1.08554500  |
| F          | -0.18642400 | 3.44575200  | -2.45345100 | C  | -6.51369600 | -4.31877000 | -0.43503700 |
| C          | 1.49307300  | -1.03388400 | -2.11837700 | H  | -6.02426300 | -4.97895300 | -2.43057400 |
| O          | 0.40008900  | -1.42099600 | -2.54316800 | H  | -6.80238600 | -3.40820900 | 1.49849000  |
| C          | 2.64452100  | -1.98635300 | -2.05253500 | H  | -7.22438200 | -5.12077800 | -0.25476900 |
| C          | 3.91181600  | -1.65210600 | -1.55032900 | Ni | 0.16425000  | 0.50485800  | -0.48224700 |
| C          | 2.44187400  | -3.29069100 | -2.54112500 | C  | 1.41325400  | -0.39726600 | 1.55531900  |
| C          | 4.93807900  | -2.59648300 | -1.53591300 | C  | 1.60465300  | 0.77346700  | 0.79895900  |
| H          | 4.11353400  | -0.66564000 | -1.15119300 | C  | 0.22077800  | 0.32937000  | 1.64340600  |
| C          | 3.46986600  | -4.22286500 | -2.52871000 | O  | -0.69912600 | 0.64700100  | 2.38174600  |
| H          | 1.46174300  | -3.54555500 | -2.93000100 | C  | 2.11238300  | -1.42361400 | 2.31567600  |
| C          | 4.74101200  | -3.89193500 | -2.02761500 | C  | 3.36063200  | -1.93235400 | 1.91021200  |
| H          | 5.90747000  | -2.31642900 | -1.13157900 | C  | 1.49862900  | -1.94737600 | 3.46992900  |
| H          | 3.29135500  | -5.22509800 | -2.91237800 | C  | 3.98385500  | -2.93173500 | 2.65406100  |
| C          | 5.86138700  | -4.90368100 | -2.03986200 | H  | 3.82813000  | -1.54996700 | 1.00807800  |
| H          | 5.51800700  | -5.88556500 | -1.69415800 | C  | 2.13360800  | -2.93857500 | 4.21405100  |
| H          | 6.25686600  | -5.04102000 | -3.05505100 | H  | 0.53003300  | -1.55981800 | 3.76919800  |
| H          | 6.69328900  | -4.58973000 | -1.40182100 | C  | 3.37630200  | -3.43400200 | 3.80875700  |
|            |             |             |             | H  | 4.94481300  | -3.32242100 | 2.33014600  |
|            |             |             |             | H  | 1.65750900  | -3.32935300 | 5.10943800  |
|            |             |             |             | H  | 3.86716800  | -4.21229600 | 4.38718400  |
|            |             |             |             | C  | 2.73254600  | 1.72600200  | 0.79633600  |
|            |             |             |             | C  | 2.72458400  | 2.85156400  | -0.04894600 |
|            |             |             |             | C  | 3.81661900  | 1.57268600  | 1.68376300  |
|            |             |             |             | C  | 3.77056300  | 3.77402200  | -0.02741500 |
|            |             |             |             | H  | 1.89080300  | 2.99319000  | -0.72624700 |
|            |             |             |             | C  | 4.85672400  | 2.49960900  | 1.71021700  |
|            |             |             |             | H  | 3.83809600  | 0.72546300  | 2.36078100  |
|            |             |             |             | C  | 4.84290500  | 3.60161400  | 0.85091800  |
|            |             |             |             | H  | 3.74433200  | 4.63140900  | -0.69512400 |
|            |             |             |             | H  | 5.68102200  | 2.36103500  | 2.40520000  |
|            |             |             |             | H  | 5.65643400  | 4.32193500  | 0.87082600  |
|            |             |             |             | C  | 0.08057600  | 0.66563500  | -2.47113600 |
|            |             |             |             | H  | -0.51967200 | -0.14212900 | -2.88030500 |
|            |             |             |             | C  | 1.40102900  | 0.36419800  | -2.09383500 |
|            |             |             |             | H  | 2.15896300  | 1.13683100  | -2.10526600 |
|            |             |             |             | C  | -0.31929500 | 1.99770800  | -3.00802800 |
| <b>TS1</b> |             |             |             |    |             |             |             |
| C          | -0.51534000 | 6.03437600  | 1.27787600  |    |             |             |             |
| C          | -0.52586300 | 4.73499500  | 0.82618500  |    |             |             |             |
| C          | -1.74685900 | 4.01037200  | 0.75431600  |    |             |             |             |
| C          | -2.96237900 | 4.65464000  | 1.16267500  |    |             |             |             |
| C          | -2.91648300 | 5.99749300  | 1.61949000  |    |             |             |             |
| C          | -1.71825700 | 6.67286800  | 1.67506700  |    |             |             |             |
| H          | 0.42261100  | 6.57961200  | 1.33530700  |    |             |             |             |
| H          | 0.38453100  | 4.22818700  | 0.52840700  |    |             |             |             |
| C          | -4.15850200 | 3.90059200  | 1.08298400  |    |             |             |             |
| H          | -3.84122000 | 6.48053600  | 1.92606000  |    |             |             |             |
| H          | -1.68884600 | 7.70016600  | 2.02763800  |    |             |             |             |
| C          | -4.11563600 | 2.60396800  | 0.63293900  |    |             |             |             |
| C          | -2.85686900 | 2.05891000  | 0.25938200  |    |             |             |             |
| H          | -5.10038200 | 4.35557600  | 1.37977500  |    |             |             |             |
| H          | -5.00962300 | 1.99707400  | 0.55723000  |    |             |             |             |
| N          | -1.71952400 | 2.72871200  | 0.30441900  |    |             |             |             |
| C          | -3.67739200 | -1.16180200 | -1.18211500 |    |             |             |             |



|    |             |             |             |            |             |             |             |
|----|-------------|-------------|-------------|------------|-------------|-------------|-------------|
| C  | 2.32108800  | -2.85314200 | -1.32334600 | C          | 1.29059900  | 0.92117000  | -1.98797000 |
| C  | 0.94300900  | -3.19739100 | -1.31351000 | C          | 0.49893700  | 0.32960500  | -2.99149100 |
| C  | 0.51808600  | -4.41690800 | -1.93867400 | C          | 2.55562500  | 1.42329300  | -2.36079200 |
| C  | 1.49130300  | -5.26371500 | -2.52966100 | C          | 0.93587000  | 0.27290500  | -4.31437500 |
| C  | 2.82231000  | -4.91172000 | -2.51260100 | H          | -0.46969600 | -0.07918000 | -2.72145300 |
| H  | 4.28871300  | -3.42584700 | -1.92247000 | C          | 2.99844200  | 1.34600300  | -3.68024100 |
| H  | 2.61620300  | -1.91008100 | -0.87682100 | H          | 3.19010700  | 1.86937500  | -1.60062600 |
| C  | -0.86864200 | -4.71215700 | -1.93692600 | C          | 2.18968400  | 0.77767000  | -4.66771400 |
| H  | 1.16743800  | -6.19001100 | -2.99762700 | H          | 0.29735300  | -0.17601200 | -5.07187500 |
| H  | 3.56248500  | -5.56321800 | -2.96843300 | H          | 3.97923100  | 1.73812700  | -3.93914600 |
| C  | -1.75428400 | -3.83495700 | -1.35756000 | H          | 2.53406000  | 0.72362900  | -5.69711800 |
| C  | -1.23529800 | -2.66075400 | -0.75977900 | C          | 0.47087100  | -1.27257900 | 2.46011900  |
| H  | -1.21934800 | -5.63150600 | -2.39903100 | H          | 0.05411600  | -0.57283700 | 3.18150300  |
| H  | -2.82183200 | -4.02160300 | -1.33785100 | C          | 1.79145000  | -1.03243700 | 1.95657000  |
| N  | 0.05582500  | -2.35322300 | -0.72204900 | H          | 2.35245200  | -1.88031300 | 1.57943100  |
| C  | -3.92314100 | -0.89867600 | 0.91573600  | C          | 0.04352200  | -2.67022300 | 2.73387100  |
| C  | -2.80639400 | 0.20779200  | 0.88061200  | F          | 0.61113300  | -3.58233900 | 1.90235000  |
| C  | -2.10175700 | -1.66654900 | -0.11881300 | F          | 0.33706500  | -3.07861500 | 3.99850800  |
| N  | -1.64806400 | -0.58203500 | 0.40633900  | F          | -1.30933000 | -2.81993600 | 2.60953600  |
| O  | -3.43105300 | -1.88036900 | -0.05636000 | C          | 2.47022600  | 0.21582700  | 2.02928500  |
| H  | -3.86238800 | -1.39752800 | 1.89028400  | O          | 1.88016900  | 1.30858300  | 2.38355800  |
| H  | -2.60004200 | 0.55161600  | 1.89484800  | C          | 3.90760300  | 0.32449800  | 1.67895600  |
| C  | -3.07366000 | 1.41734000  | 0.00215400  | C          | 4.78806200  | -0.76931900 | 1.73929400  |
| C  | -3.05414200 | 1.33532200  | -1.39610700 | C          | 4.42579500  | 1.57825200  | 1.30900100  |
| C  | -3.37176800 | 2.64610800  | 0.60166800  | C          | 6.13508300  | -0.61422000 | 1.42293000  |
| C  | -3.33537900 | 2.45568900  | -2.17776100 | H          | 4.42983700  | -1.74031800 | 2.06741300  |
| H  | -2.80873700 | 0.39514300  | -1.88162900 | C          | 5.77139800  | 1.72266200  | 0.98771200  |
| C  | -3.65614800 | 3.76814600  | -0.17781400 | H          | 3.75699600  | 2.43107300  | 1.27630200  |
| H  | -3.36230900 | 2.72919000  | 1.68481700  | C          | 6.65065500  | 0.63033900  | 1.03364900  |
| C  | -3.63962000 | 3.67568200  | -1.56994600 | H          | 6.80152900  | -1.47116200 | 1.49016900  |
| H  | -3.31035300 | 2.37662500  | -3.26135900 | H          | 6.14973500  | 2.70081900  | 0.69929900  |
| H  | -3.87680400 | 4.71654800  | 0.30413000  | C          | 8.10498700  | 0.78782100  | 0.65938300  |
| H  | -3.85256100 | 4.55056300  | -2.17824500 | H          | 8.24847700  | 0.67382600  | -0.42376500 |
| C  | -5.34711400 | -0.50992000 | 0.63186600  | H          | 8.48427600  | 1.77837600  | 0.93261500  |
| C  | -6.15768800 | -0.10993700 | 1.70182000  | H          | 8.73046300  | 0.03557600  | 1.15141900  |
| C  | -5.88103700 | -0.51957200 | -0.66186000 |            |             |             |             |
| C  | -7.47479400 | 0.29328500  | 1.48217200  | <b>CP5</b> |             |             |             |
| H  | -5.75712500 | -0.11697800 | 2.71334900  | C          | -2.00147100 | -5.08091300 | 2.19614600  |
| C  | -7.20217000 | -0.12797300 | -0.87956700 | C          | -1.45986400 | -3.93205500 | 1.66754700  |
| H  | -5.26533700 | -0.84515500 | -1.49310300 | C          | -0.05866900 | -3.84088000 | 1.44449200  |
| C  | -8.00079000 | 0.28420000  | 0.18898100  | C          | 0.78085300  | -4.95119400 | 1.79232100  |
| H  | -8.09119800 | 0.60312800  | 2.32155400  | C          | 0.18808300  | -6.12262100 | 2.33113000  |
| H  | -7.60773800 | -0.14453800 | -1.88757700 | C          | -1.17361400 | -6.18559700 | 2.52564400  |
| H  | -9.02896100 | 0.59003700  | 0.01583000  | H          | -3.07187700 | -5.14686600 | 2.36896700  |
| Ni | 0.30059500  | -0.44015200 | 0.65925900  | H          | -2.06763200 | -3.06617800 | 1.42612600  |
| C  | 0.74454200  | 2.04691500  | 0.21172900  | C          | 2.17415900  | -4.80706900 | 1.57746400  |
| C  | 0.85531700  | 0.95517600  | -0.58754400 | H          | 0.82530600  | -6.96490400 | 2.58910400  |
| C  | 0.29892700  | 1.56781600  | 1.54317400  | H          | -1.62178500 | -7.08470200 | 2.93906600  |
| O  | -0.55671100 | 1.83731000  | 2.33287100  | C          | 2.66749500  | -3.63462000 | 1.05681100  |
| C  | 0.91114700  | 3.50632500  | -0.00736700 | C          | 1.74694100  | -2.60063000 | 0.73691800  |
| C  | 1.32285900  | 4.34335500  | 1.04570500  | H          | 2.84226500  | -5.62763600 | 1.82702800  |
| C  | 0.64407100  | 4.08812600  | -1.25973200 | H          | 3.72584200  | -3.48954600 | 0.87689100  |
| C  | 1.47829700  | 5.71540300  | 0.84743700  | N          | 0.44004700  | -2.69451100 | 0.91582000  |
| H  | 1.52774900  | 3.91072800  | 2.02063500  | C          | 3.76977800  | -0.07735200 | -0.88078800 |
| C  | 0.80470800  | 5.45871900  | -1.45426800 | C          | 2.43025200  | 0.72148700  | -0.72300700 |
| H  | 0.29965200  | 3.46167000  | -2.07524500 | C          | 2.23327600  | -1.33535900 | 0.15503400  |
| C  | 1.22379400  | 6.27981400  | -0.40385500 | N          | 1.50770900  | -0.35797700 | -0.27193200 |
| H  | 1.79992300  | 6.34379700  | 1.67434400  | O          | 3.57174400  | -1.19573600 | 0.03679300  |
| H  | 0.59244300  | 5.88911000  | -2.42997500 | H          | 3.77400300  | -0.51949700 | -1.88410200 |
| H  | 1.34451500  | 7.34893400  | -0.55843200 | H          | 2.10392800  | 1.06516600  | -1.70717100 |



|    |             |             |             |            |             |             |             |
|----|-------------|-------------|-------------|------------|-------------|-------------|-------------|
| C  | 2.45256800  | 1.91197100  | 0.21669700  | C          | -3.94609900 | -1.11451800 | -0.84248700 |
| C  | 2.67172600  | 1.76456400  | 1.59313700  | C          | -4.33068400 | 0.80311100  | -2.24547700 |
| C  | 2.29435000  | 3.19964400  | -0.30798900 | C          | -5.30724200 | -1.17808300 | -0.55957300 |
| C  | 2.74675200  | 2.88325000  | 2.42263600  | H          | -3.26799100 | -1.82723800 | -0.38119500 |
| H  | 2.78399900  | 0.77365200  | 2.02398700  | C          | -5.69246900 | 0.73651500  | -1.95037100 |
| C  | 2.36915500  | 4.32091600  | 0.51994900  | H          | -3.96188800 | 1.56695500  | -2.92232900 |
| H  | 2.09351300  | 3.32876900  | -1.36862500 | C          | -6.20847000 | -0.25095900 | -1.10333500 |
| C  | 2.60161000  | 4.16535800  | 1.88669300  | H          | -5.67604600 | -1.95378800 | 0.10829900  |
| H  | 2.91671500  | 2.75307500  | 3.48803000  | H          | -6.36688500 | 1.46486900  | -2.39532800 |
| H  | 2.23173900  | 5.31156100  | 0.09664400  | C          | -7.67911300 | -0.30156100 | -0.76081700 |
| H  | 2.65768300  | 5.03652400  | 2.53365400  | H          | -7.88296500 | 0.19185000  | 0.19922400  |
| C  | 5.07653100  | 0.62362600  | -0.62956300 | H          | -8.28448900 | 0.20342000  | -1.52085500 |
| C  | 5.63942700  | 1.37624500  | -1.66866300 | H          | -8.03659300 | -1.33394800 | -0.67476100 |
| C  | 5.74262600  | 0.55136200  | 0.59841600  |            |             |             |             |
| C  | 6.83828600  | 2.06230700  | -1.47794300 | <b>TS3</b> |             |             |             |
| H  | 5.13965000  | 1.42336900  | -2.63398700 | C          | 2.05283000  | 5.12529600  | 2.34551200  |
| C  | 6.94880600  | 1.22853500  | 0.78479200  | C          | 1.47126900  | 3.97153900  | 1.87156100  |
| H  | 5.32459800  | -0.04688000 | 1.40066100  | C          | 0.13078400  | 3.98831000  | 1.39846100  |
| C  | 7.49721700  | 1.98926400  | -0.24884300 | C          | -0.60626800 | 5.21798200  | 1.43198400  |
| H  | 7.26141800  | 2.64463000  | -2.29174000 | C          | 0.02423100  | 6.38905600  | 1.92596000  |
| H  | 7.46017100  | 1.16011800  | 1.74115300  | C          | 1.32640500  | 6.34335200  | 2.37161600  |
| H  | 8.43551100  | 2.51666900  | -0.10072400 | H          | 3.07822700  | 5.10817700  | 2.70398400  |
| Ni | -0.35100600 | -0.40837300 | -0.86602800 | H          | 2.00728800  | 3.02804700  | 1.84996000  |
| C  | -1.48092000 | 2.11690400  | -0.38335400 | C          | -1.94489500 | 5.19053200  | 0.96600900  |
| C  | -1.19787000 | 0.92803000  | 0.22357100  | H          | -0.53665600 | 7.32025100  | 1.94548200  |
| C  | -1.34789200 | 2.25208800  | -1.86381800 | H          | 1.80445400  | 7.24380700  | 2.74680300  |
| O  | -1.11152400 | 3.27099500  | -2.46877900 | C          | -2.48228300 | 4.01380700  | 0.50436800  |
| C  | -1.88260000 | 3.37951700  | 0.31076500  | C          | -1.66470600 | 2.85173500  | 0.50485000  |
| C  | -2.92402500 | 4.18134500  | -0.18785000 | H          | -2.53372400 | 6.10433400  | 0.97545100  |
| C  | -1.23004400 | 3.79843300  | 1.48163000  | H          | -3.49895600 | 3.95464100  | 0.13487400  |
| C  | -3.31156100 | 5.34758600  | 0.47021400  | N          | -0.41254900 | 2.83001000  | 0.93807200  |
| H  | -3.43536700 | 3.88779300  | -1.09968300 | C          | -3.72987600 | 0.32425700  | -1.04756600 |
| C  | -1.61693800 | 4.96502900  | 2.14073200  | C          | -2.48184400 | -0.53984400 | -0.65467800 |
| H  | -0.40886400 | 3.20719400  | 1.87199800  | C          | -2.19570000 | 1.58017400  | -0.00988500 |
| C  | -2.66113800 | 5.74493200  | 1.64048000  | N          | -1.50697700 | 0.52043100  | -0.28976800 |
| H  | -4.12342200 | 5.94758400  | 0.06643600  | O          | -3.52826700 | 1.52018600  | -0.23537500 |
| H  | -1.09406200 | 5.26808200  | 3.04462500  | H          | -3.60195800 | 0.64078400  | -2.09072500 |
| H  | -2.96143600 | 6.65550300  | 2.15279200  | H          | -2.11725300 | -1.07580900 | -1.53360700 |
| C  | -1.54518000 | 0.63913600  | 1.62913500  | C          | -2.72238500 | -1.52974700 | 0.47321200  |
| C  | -0.62153800 | 0.08241500  | 2.53366400  | C          | -2.60262100 | -1.17097100 | 1.82156600  |
| C  | -2.86471800 | 0.84849500  | 2.08371100  | C          | -3.15585300 | -2.82322100 | 0.15374900  |
| C  | -0.98784100 | -0.21614800 | 3.84497200  | C          | -2.92611700 | -2.08325800 | 2.82874400  |
| H  | 0.39087200  | -0.10380800 | 2.19778600  | H          | -2.24203900 | -0.18311700 | 2.09001100  |
| C  | -3.23596000 | 0.52508400  | 3.38769200  | C          | -3.48662100 | -3.73192900 | 1.15770300  |
| H  | -3.59584800 | 1.26734200  | 1.40014200  | H          | -3.23832300 | -3.11978000 | -0.88884700 |
| C  | -2.29827000 | -0.00120700 | 4.27923400  | C          | -3.37725300 | -3.36251900 | 2.50002400  |
| H  | -0.24931200 | -0.62852700 | 4.52865900  | H          | -2.82391200 | -1.79118900 | 3.87060100  |
| H  | -4.26043200 | 0.69394300  | 3.71063300  | H          | -3.81917200 | -4.73110700 | 0.89104900  |
| H  | -2.58578300 | -0.24465200 | 5.29889900  | H          | -3.63278700 | -4.07032300 | 3.28409000  |
| C  | 0.05452600  | -1.28945400 | -2.73102000 | C          | -5.11051100 | -0.23764900 | -0.85516900 |
| H  | 0.50356100  | -0.44228200 | -3.24486800 | C          | -5.73704900 | -0.87458900 | -1.93354900 |
| C  | -1.31246500 | -1.27675500 | -2.42032400 | C          | -5.77847700 | -0.15755200 | 0.37294100  |
| H  | -1.82046700 | -2.21324700 | -2.20875900 | C          | -7.00357400 | -1.44102800 | -1.78433500 |
| C  | 0.76752300  | -2.57325400 | -2.95922600 | H          | -5.23348200 | -0.92467200 | -2.89674400 |
| F  | 0.24221500  | -3.59932400 | -2.24940900 | C          | -7.04941700 | -0.71291800 | 0.51789100  |
| F  | 0.76834300  | -2.95944700 | -4.26005300 | H          | -5.30470400 | 0.34623100  | 1.20841500  |
| F  | 2.08464100  | -2.47770200 | -2.60384500 | C          | -7.66347400 | -1.35980800 | -0.55707500 |
| C  | -1.99021400 | -0.08377300 | -2.05899700 | H          | -7.47716400 | -1.93366000 | -2.62904800 |
| O  | -1.54828800 | 1.10548800  | -2.65375300 | H          | -7.56109100 | -0.64067600 | 1.47379700  |
| C  | -3.43440600 | -0.12485500 | -1.69641800 | H          | -8.65349500 | -1.79221800 | -0.44041400 |

|            |             |             |             |    |             |             |             |
|------------|-------------|-------------|-------------|----|-------------|-------------|-------------|
| Ni         | 0.38498400  | 0.54697000  | -0.69930400 | H  | 1.87635900  | 1.68737900  | -1.81406300 |
| C          | 1.10597700  | -2.31914400 | -0.68964100 | C  | -1.01468000 | 5.06923600  | -0.66192400 |
| C          | 1.36205800  | -1.12285800 | -0.06323800 | H  | 1.16489400  | 6.58680100  | -1.21780600 |
| C          | 1.17486800  | -2.22049800 | -2.16496200 | H  | 3.35053000  | 5.74059900  | -2.02169600 |
| O          | 0.77020900  | -2.99065100 | -3.00594800 | C  | -2.02391500 | 4.15361800  | -0.48525400 |
| C          | 0.86183700  | -3.64484100 | -0.07892400 | C  | -1.73866900 | 2.78926200  | -0.70215700 |
| C          | 1.27592300  | -4.82707700 | -0.72561900 | H  | -1.19046000 | 6.13095200  | -0.51066500 |
| C          | 0.22774900  | -3.76423900 | 1.17223300  | H  | -3.02907900 | 4.44582000  | -0.20312700 |
| C          | 1.08527400  | -6.07254400 | -0.12990500 | N  | -0.52793700 | 2.30863500  | -1.03022200 |
| H          | 1.74515200  | -4.76834900 | -1.70033500 | C  | -4.79983200 | 0.83218200  | -0.70097400 |
| C          | 0.03771900  | -5.01090800 | 1.76347500  | C  | -3.67983100 | -0.27349000 | -0.86053700 |
| H          | -0.12906900 | -2.87418400 | 1.67722500  | C  | -2.76657600 | 1.75568100  | -0.67582400 |
| C          | 0.46970000  | -6.17240200 | 1.11928400  | N  | -2.47732000 | 0.55824500  | -1.05473300 |
| H          | 1.42065100  | -6.96839100 | -0.64632300 | O  | -4.03183900 | 2.02139800  | -0.30576000 |
| H          | -0.46010500 | -5.07260300 | 2.72737200  | H  | -5.19558500 | 1.05670200  | -1.69880400 |
| H          | 0.32079100  | -7.14486300 | 1.58168000  | H  | -3.86486100 | -0.83632700 | -1.77885700 |
| C          | 1.81668700  | -1.00069800 | 1.34456900  | C  | -3.52940200 | -1.25735800 | 0.28728500  |
| C          | 1.31772400  | 0.00077200  | 2.19710000  | C  | -2.71382200 | -0.99279100 | 1.39326400  |
| C          | 2.82161700  | -1.85492100 | 1.84303300  | C  | -4.24630200 | -2.46092300 | 0.24476300  |
| C          | 1.77853900  | 0.12021500  | 3.50986700  | C  | -2.61803400 | -1.91320400 | 2.43852400  |
| H          | 0.56515700  | 0.69008800  | 1.82521400  | H  | -2.11493300 | -0.09022800 | 1.43994200  |
| C          | 3.28962200  | -1.72558600 | 3.14829600  | C  | -4.16158400 | -3.37555700 | 1.29394400  |
| H          | 3.23744100  | -2.61819400 | 1.19392200  | H  | -4.87313000 | -2.68404400 | -0.61592000 |
| C          | 2.76555500  | -0.74172700 | 3.99128600  | C  | -3.34569000 | -3.10275300 | 2.39513600  |
| H          | 1.36886300  | 0.89525600  | 4.15311500  | H  | -1.95389500 | -1.69379900 | 3.26899000  |
| H          | 4.06690600  | -2.39484800 | 3.50797200  | H  | -4.72325000 | -4.30481700 | 1.24594800  |
| H          | 3.12997400  | -0.64348500 | 5.01068100  | H  | -3.26884200 | -3.82105600 | 3.20722800  |
| C          | 0.76837300  | 1.52247000  | -2.47587000 | C  | -5.94016000 | 0.59244100  | 0.24808700  |
| H          | 0.35589000  | 0.86653800  | -3.23783000 | C  | -7.16743900 | 0.15485500  | -0.26381100 |
| C          | 1.91622900  | 1.15196300  | -1.75109000 | C  | -5.80321900 | 0.77783100  | 1.62985000  |
| H          | 2.53100100  | 1.91986000  | -1.29201500 | C  | -8.23908100 | -0.11109700 | 0.58989400  |
| C          | 0.45600800  | 2.95730000  | -2.70304700 | H  | -7.28737100 | 0.02438400  | -1.33734500 |
| F          | 0.97973100  | 3.77383700  | -1.75425000 | C  | -6.87755500 | 0.52389900  | 2.48122100  |
| F          | 0.90996800  | 3.42020000  | -3.89868800 | H  | -4.85862900 | 1.12447000  | 2.03488500  |
| F          | -0.89030200 | 3.17518600  | -2.71356700 | C  | -8.09599500 | 0.07504000  | 1.96544500  |
| C          | 2.30747800  | -0.24116200 | -1.53413900 | H  | -9.18545400 | -0.45169400 | 0.17876500  |
| O          | 1.85564700  | -1.08358900 | -2.56571400 | H  | -6.76143100 | 0.67418900  | 3.55101200  |
| C          | 3.75185000  | -0.46895800 | -1.16353800 | H  | -8.93044600 | -0.12363400 | 2.63252300  |
| C          | 4.40168300  | 0.33783400  | -0.21741900 | Ni | -0.55306000 | 0.27619200  | -1.26955300 |
| C          | 4.48563900  | -1.49381500 | -1.77490700 | C  | -0.23237900 | -1.54979100 | -1.64561500 |
| C          | 5.74304300  | 0.13113100  | 0.09421600  | H  | -0.68795800 | -2.24897800 | -0.94519600 |
| H          | 3.85508000  | 1.12046100  | 0.29982000  | C  | 1.02100000  | -0.91007900 | -1.29763500 |
| C          | 5.82901000  | -1.69322200 | -1.45623900 | H  | 1.75321200  | -0.74896100 | -2.09018000 |
| H          | 4.01226600  | -2.12446000 | -2.51896200 | C  | -0.52645700 | -1.90788600 | -3.05748700 |
| C          | 6.48597300  | -0.88518500 | -0.52123800 | F  | -1.86225300 | -2.06637200 | -3.27421400 |
| H          | 6.21873200  | 0.76783100  | 0.83699800  | F  | -0.09036500 | -0.97638200 | -3.94703900 |
| H          | 6.37679500  | -2.49178600 | -1.95190800 | F  | 0.04455300  | -3.08909600 | -3.45879700 |
| C          | 7.94966300  | -1.08367400 | -0.20351100 | C  | 1.65552300  | -1.26235600 | 0.04848300  |
| H          | 8.16754300  | -0.85590700 | 0.84587900  | O  | 0.63472900  | -1.05788900 | 1.07563900  |
| H          | 8.26603400  | -2.11384300 | -0.39890800 | C  | 2.11429100  | -2.72962800 | 0.21854000  |
| H          | 8.58314200  | -0.42704600 | -0.81530600 | C  | 2.06713300  | -3.66190300 | -0.82221200 |
|            |             |             |             | C  | 2.59840800  | -3.15857900 | 1.46520600  |
|            |             |             |             | C  | 2.49423600  | -4.97819400 | -0.62084500 |
|            |             |             |             | H  | 1.68695700  | -3.37563900 | -1.79460100 |
|            |             |             |             | C  | 3.01737600  | -4.47036200 | 1.66079800  |
|            |             |             |             | H  | 2.64735100  | -2.46052700 | 2.29570800  |
|            |             |             |             | C  | 2.97382900  | -5.40925300 | 0.61876500  |
|            |             |             |             | H  | 2.44388500  | -5.68123700 | -1.44946400 |
|            |             |             |             | H  | 3.38549400  | -4.77192400 | 2.63942900  |
|            |             |             |             | C  | 3.41182300  | -6.83797300 | 0.84202000  |
| <b>CP6</b> |             |             |             |    |             |             |             |
| C          | 2.74406600  | 3.65706300  | -1.97862200 |    |             |             |             |
| C          | 1.74008300  | 2.75636900  | -1.69734000 |    |             |             |             |
| C          | 0.47537600  | 3.21580600  | -1.25396200 |    |             |             |             |
| C          | 0.26448200  | 4.62588600  | -1.08059700 |    |             |             |             |
| C          | 1.33011400  | 5.52113400  | -1.35458000 |    |             |             |             |
| C          | 2.54291000  | 5.04798100  | -1.80245800 |    |             |             |             |
| H          | 3.70426500  | 3.29245400  | -2.32970800 |    |             |             |             |

|           |             |             |             |            |             |             |             |
|-----------|-------------|-------------|-------------|------------|-------------|-------------|-------------|
| H         | 3.52448500  | -7.37438100 | -0.10566100 | C          | 3.61012100  | 1.09076000  | 0.04097500  |
| H         | 4.36950900  | -6.88689200 | 1.37393400  | C          | 3.87994400  | -0.66981800 | -1.59713800 |
| H         | 2.67994000  | -7.38883500 | 1.44758700  | C          | 4.99302500  | 1.24001000  | 0.10923300  |
| C         | 2.39211100  | 0.34490700  | 1.60822700  | H          | 2.96855100  | 1.72998300  | 0.63916000  |
| C         | 2.76602400  | -0.28357800 | 0.46242400  | C          | 5.26455000  | -0.52099400 | -1.52011600 |
| C         | 1.00833500  | -0.08814600 | 1.94419500  | H          | 3.44865400  | -1.39503000 | -2.27684100 |
| O         | 0.27021900  | 0.31105300  | 2.82251300  | C          | 5.82632200  | 0.43084300  | -0.66781900 |
| C         | 3.12436400  | 1.25878500  | 2.50901400  | H          | 5.42058500  | 1.99331400  | 0.76548000  |
| C         | 4.45272400  | 0.99017600  | 2.88485900  | H          | 5.90488600  | -1.14854100 | -2.13403800 |
| C         | 2.48558200  | 2.38432200  | 3.05695700  | H          | 6.90538900  | 0.54787600  | -0.61423300 |
| C         | 5.12896600  | 1.83412200  | 3.76303900  | C          | 0.78082700  | 0.18708600  | 1.52988700  |
| H         | 4.95077100  | 0.11053500  | 2.48823200  | C          | 1.70070800  | -0.66056100 | 2.17741000  |
| C         | 3.16732900  | 3.23027900  | 3.93233200  | C          | 0.01678000  | 1.07094800  | 2.31367300  |
| H         | 1.45060200  | 2.58320600  | 2.80342000  | C          | 1.85518600  | -0.62004500 | 3.56054000  |
| C         | 4.49010500  | 2.96115100  | 4.28725100  | H          | 2.28490200  | -1.35916000 | 1.58735600  |
| H         | 6.15390000  | 1.60714600  | 4.04473400  | C          | 0.18165900  | 1.11350600  | 3.69886800  |
| H         | 2.65878800  | 4.09858400  | 4.34318100  | H          | -0.69325700 | 1.73827200  | 1.83910700  |
| H         | 5.01747600  | 3.61848000  | 4.97357200  | C          | 1.09800700  | 0.26978100  | 4.32731300  |
| C         | 3.99601000  | -0.07865100 | -0.33171700 | H          | 2.56483700  | -1.28801000 | 4.04080900  |
| C         | 4.61821700  | 1.18684900  | -0.35865500 | H          | -0.41063500 | 1.80991400  | 4.28611700  |
| C         | 4.57370500  | -1.10935100 | -1.09842600 | H          | 1.21995100  | 0.30161500  | 5.40650500  |
| C         | 5.77318600  | 1.40564800  | -1.10505400 |            |             |             |             |
| H         | 4.18223000  | 2.00503200  | 0.20138500  |            |             |             |             |
| C         | 5.73213000  | -0.88713000 | -1.84362000 | <b>TS4</b> |             |             |             |
| H         | 4.12812400  | -2.09570800 | -1.09988000 | C          | -1.67478600 | 5.79521100  | 0.82849800  |
| C         | 6.33997500  | 0.36799600  | -1.85025500 | C          | -1.47578000 | 4.45880800  | 0.55950500  |
| H         | 6.23255300  | 2.39094000  | -1.10342200 | C          | -2.49176700 | 3.69901300  | -0.07374800 |
| H         | 6.15875700  | -1.70378500 | -2.41966900 | C          | -3.72293800 | 4.34364400  | -0.43142200 |
| H         | 7.24269900  | 0.53847600  | -2.43071400 | C          | -3.88981100 | 5.72239400  | -0.14464300 |
|           |             |             |             | C          | -2.88679600 | 6.43540300  | 0.47385900  |
| <b>3a</b> |             |             |             | H          | -0.89093600 | 6.36629600  | 1.31781100  |
| C         | -1.83299900 | -2.34484000 | -0.70949600 | H          | -0.54901100 | 3.96467800  | 0.82615600  |
| H         | -1.67675500 | -2.41395800 | -1.78094100 | C          | -4.72797300 | 3.56771000  | -1.06465200 |
| C         | -1.46220500 | -1.27634100 | -0.00792100 | H          | -4.82518400 | 6.20334900  | -0.41957400 |
| H         | -1.63503000 | -1.24033900 | 1.06392300  | H          | -3.02232900 | 7.49099900  | 0.69129000  |
| C         | -2.49483700 | -3.53113000 | -0.08557500 | C          | -4.50850600 | 2.23255400  | -1.29842200 |
| F         | -3.70695500 | -3.75639800 | -0.64357300 | C          | -3.27262000 | 1.67276400  | -0.90270400 |
| F         | -1.76364400 | -4.65338500 | -0.27406700 | H          | -5.66371700 | 4.03879900  | -1.35388000 |
| F         | -2.68334100 | -3.39045300 | 1.24460000  | H          | -5.24957100 | 1.59884900  | -1.77224000 |
| C         | -0.76777300 | -0.06666500 | -0.59434800 | N          | -2.27975500 | 2.36927200  | -0.32859900 |
| O         | -0.46400200 | -0.31683100 | -1.98251100 | C          | -3.11246800 | -1.83881300 | -1.80997200 |
| C         | -1.62537700 | 1.20604400  | -0.53410000 | C          | -1.97283800 | -1.71345500 | -0.72892500 |
| C         | -2.97421900 | 1.17504500  | -0.17302300 | C          | -2.97420400 | 0.25486400  | -1.04850800 |
| C         | -1.06157800 | 2.43656400  | -0.90575800 | N          | -1.88939900 | -0.24720800 | -0.55949100 |
| C         | -3.73721100 | 2.34592800  | -0.16972200 | O          | -3.84535600 | -0.57816200 | -1.65672800 |
| H         | -3.44508400 | 0.23513800  | 0.09679600  | H          | -2.63874400 | -1.78947300 | -2.79835800 |
| C         | -1.82710200 | 3.59731100  | -0.90529400 | H          | -1.03463800 | -2.08642900 | -1.14162100 |
| H         | -0.01724700 | 2.48579800  | -1.20051700 | C          | -2.22548200 | -2.41956600 | 0.59317000  |
| C         | -3.18095000 | 3.57579900  | -0.53228700 | C          | -3.01543800 | -1.85720800 | 1.60447800  |
| H         | -4.78554200 | 2.29510500  | 0.11455900  | C          | -1.67295000 | -3.69084800 | 0.79524800  |
| H         | -1.36801800 | 4.53792600  | -1.20145900 | C          | -3.25566900 | -2.55698000 | 2.78881500  |
| C         | -3.99958800 | 4.84527200  | -0.52215600 | H          | -3.43216400 | -0.86220900 | 1.47674900  |
| H         | -5.05677400 | 4.63814100  | -0.32946400 | C          | -1.91659700 | -4.39275800 | 1.97597700  |
| H         | -3.64975300 | 5.53931800  | 0.25293600  | H          | -1.03911300 | -4.12264900 | 0.02594800  |
| H         | -3.92887200 | 5.37291600  | -1.48075000 | C          | -2.70993000 | -3.82819600 | 2.97643600  |
| C         | 1.56804700  | -0.02252600 | -0.89227300 | H          | -3.86787600 | -2.10619100 | 3.56576400  |
| C         | 0.61443000  | 0.08515100  | 0.06447100  | H          | -1.47736600 | -5.37643600 | 2.11847000  |
| C         | 0.89220900  | -0.31475000 | -2.18951900 | H          | -2.89434800 | -4.37121400 | 3.89951900  |
| O         | 1.36751700  | -0.53278900 | -3.27657400 | C          | -4.04466700 | -3.01738300 | -1.75863900 |
| C         | 3.03311600  | 0.12742400  | -0.80656900 | C          | -3.72655000 | -4.16143100 | -2.50113000 |
|           |             |             |             | C          | -5.20645200 | -3.01257700 | -0.97735100 |

|    |             |             |             |            |             |             |             |
|----|-------------|-------------|-------------|------------|-------------|-------------|-------------|
| C  | -4.54583000 | -5.28963400 | -2.45236700 | <b>CP7</b> |             |             |             |
| H  | -2.83346700 | -4.16937500 | -3.12234600 | C          | -1.18130600 | 5.21203600  | -0.97741800 |
| C  | -6.03183200 | -4.13627700 | -0.93863400 | C          | -0.64695300 | 3.96564300  | -0.74512500 |
| H  | -5.46765300 | -2.12511900 | -0.41096800 | C          | 0.41941700  | 3.80788300  | 0.17527600  |
| C  | -5.70272400 | -5.27877200 | -1.67129300 | C          | 0.93727200  | 4.96966500  | 0.84671600  |
| H  | -4.28527100 | -6.17074000 | -3.03236700 | C          | 0.34388800  | 6.23494900  | 0.60035000  |
| H  | -6.93409900 | -4.11918700 | -0.33315300 | C          | -0.69440700 | 6.35377000  | -0.29449200 |
| H  | -6.34710900 | -6.15309500 | -1.63784800 | H          | -1.99562000 | 5.31793800  | -1.68789900 |
| Ni | -0.60037500 | 1.18243800  | 0.01342700  | H          | -1.02282600 | 3.09220000  | -1.25694900 |
| C  | 1.60427500  | -0.83882600 | 0.42934800  | C          | 2.04345000  | 4.80965800  | 1.71434000  |
| C  | 1.02673800  | 0.42011700  | 0.46198500  | H          | 0.73458600  | 7.10536200  | 1.12119400  |
| C  | 1.74302600  | -1.56301100 | -0.86587900 | H          | -1.14087100 | 7.32572800  | -0.48482300 |
| O  | 1.12998300  | -2.55340100 | -1.21301100 | C          | 2.62169500  | 3.57045400  | 1.85622500  |
| C  | 2.18585600  | -1.55732700 | 1.59261500  | C          | 2.05477900  | 2.48676000  | 1.15430900  |
| C  | 2.04059500  | -2.95331500 | 1.73531200  | H          | 2.43863400  | 5.67353900  | 2.24239000  |
| C  | 2.95542400  | -0.88253200 | 2.56416700  | H          | 3.49136500  | 3.40382800  | 2.48137000  |
| C  | 2.61736100  | -3.63250900 | 2.80780100  | N          | 0.96658700  | 2.56698300  | 0.37551300  |
| H  | 1.46293500  | -3.50153600 | 0.99984900  | C          | 4.07946700  | -0.48983300 | 1.66547300  |
| C  | 3.52145000  | -1.56366900 | 3.63839100  | C          | 3.11709700  | -0.91845700 | 0.49409400  |
| H  | 3.12146500  | 0.18454300  | 2.46595400  | C          | 2.66390000  | 1.15853000  | 1.15339500  |
| C  | 3.35642700  | -2.94499400 | 3.77164200  | N          | 2.12489500  | 0.17718700  | 0.51352000  |
| H  | 2.48115300  | -4.70833000 | 2.89118700  | O          | 3.85110100  | 0.95659100  | 1.75165300  |
| H  | 4.11030700  | -1.01217200 | 4.36761500  | H          | 3.67802500  | -0.90989600 | 2.59533300  |
| H  | 3.80281700  | -3.47572400 | 4.60841900  | H          | 2.63197300  | -1.85350400 | 0.76768800  |
| C  | 0.78266300  | 1.18436100  | 1.72351900  | C          | 3.75502500  | -1.08466600 | -0.87744100 |
| C  | -0.15065700 | 0.65327300  | 2.64989800  | C          | 3.84323800  | -0.03179300 | -1.79618900 |
| C  | 1.40369800  | 2.41499200  | 2.04194200  | C          | 4.28364400  | -2.33452200 | -1.22983200 |
| C  | -0.44840900 | 1.33197500  | 3.83329300  | C          | 4.45625900  | -0.22286300 | -3.03650800 |
| H  | -0.60755500 | -0.30824600 | 2.44380800  | H          | 3.41090700  | 0.93420400  | -1.55463800 |
| C  | 1.10948900  | 3.07730700  | 3.23083600  | C          | 4.89993400  | -2.52529400 | -2.46612600 |
| H  | 2.12466300  | 2.84064100  | 1.35603100  | H          | 4.21229600  | -3.16402200 | -0.53017600 |
| C  | 0.17858000  | 2.54283200  | 4.12896200  | C          | 4.98830800  | -1.46774400 | -3.37433700 |
| H  | -1.16592000 | 0.90384000  | 4.52828300  | H          | 4.51004400  | 0.60252000  | -3.74140300 |
| H  | 1.60815300  | 4.01606900  | 3.45901800  | H          | 5.30442500  | -3.50084100 | -2.72206700 |
| H  | -0.05010900 | 3.06622000  | 5.05354100  | H          | 5.46138700  | -1.61622000 | -4.34120300 |
| C  | 1.53403700  | 1.36985300  | -1.13589900 | C          | 5.54710100  | -0.79662800 | 1.56410700  |
| H  | 1.07954700  | 0.73881600  | -1.90390600 | C          | 6.04998100  | -1.92686800 | 2.21983800  |
| C  | 3.00662900  | 1.14366100  | -1.11846300 | C          | 6.42029300  | 0.00501300  | 0.81788500  |
| H  | 3.65120200  | 1.96933100  | -0.83774100 | C          | 7.40071200  | -2.26352000 | 2.11931900  |
| C  | 1.28524800  | 2.79656300  | -1.59521600 | H          | 5.38260000  | -2.54495800 | 2.81678000  |
| F  | 1.66977700  | 3.73630700  | -0.68911300 | C          | 7.77202200  | -0.32449200 | 0.72798900  |
| F  | 1.98975600  | 3.06934100  | -2.72667100 | H          | 6.04148300  | 0.88984800  | 0.31723500  |
| F  | -0.00758000 | 3.05151300  | -1.90792500 | C          | 8.26536300  | -1.46094900 | 1.37381900  |
| C  | 3.55283100  | -0.04822200 | -1.40900100 | H          | 7.77711500  | -3.14374100 | 2.63317100  |
| O  | 2.71427700  | -1.11688200 | -1.74371400 | H          | 8.44170000  | 0.30753000  | 0.15117300  |
| C  | 4.98461400  | -0.38040000 | -1.47934000 | H          | 9.31924100  | -1.71529700 | 1.30115000  |
| C  | 5.96956600  | 0.62095300  | -1.56972000 | Ni         | 0.24863400  | 0.63127500  | 0.01649100  |
| C  | 5.40861900  | -1.71889100 | -1.45795300 | C          | -1.66613000 | 0.46325900  | -0.34166200 |
| C  | 7.31952000  | 0.29277200  | -1.60925900 | C          | -1.00076700 | -0.83472800 | -0.10483900 |
| H  | 5.67756600  | 1.66555700  | -1.62607400 | C          | -2.46618500 | 1.15738500  | 0.72669700  |
| C  | 6.76458000  | -2.03803700 | -1.50304000 | O          | -2.45257400 | 2.35230400  | 0.92506700  |
| H  | 4.67056800  | -2.51092700 | -1.39970100 | C          | -2.07613400 | 0.89655800  | -1.72575300 |
| C  | 7.74648500  | -1.04391300 | -1.57810500 | C          | -1.18233300 | 0.84669200  | -2.81423000 |
| H  | 8.05818100  | 1.08870800  | -1.67779500 | C          | -3.37750700 | 1.36728700  | -1.98470700 |
| H  | 7.06383400  | -3.08347700 | -1.47625700 | C          | -1.57156900 | 1.23940200  | -4.09371400 |
| C  | 9.21419600  | -1.39230400 | -1.65579500 | H          | -0.16904500 | 0.49404200  | -2.64891900 |
| H  | 9.58397800  | -1.33586900 | -2.68869800 | C          | -3.76638700 | 1.76933700  | -3.26344000 |
| H  | 9.82288300  | -0.70377000 | -1.05838400 | H          | -4.10240100 | 1.42097500  | -1.17725500 |
| H  | 9.40330200  | -2.40920800 | -1.29653600 | C          | -2.86685000 | 1.70656900  | -4.32807800 |
|    |             |             |             | H          | -0.85492200 | 1.18446800  | -4.90949700 |

|            |              |             |             |                  |             |             |             |
|------------|--------------|-------------|-------------|------------------|-------------|-------------|-------------|
| H          | -4.78070000  | 2.12618600  | -3.42492600 | H                | -3.71433200 | -1.56587700 | -0.77247000 |
| H          | -3.16907400  | 2.01737100  | -5.32472800 | C                | -4.18847400 | -1.12396900 | 2.56584700  |
| C          | -0.92237600  | -1.84665300 | -1.22993500 | H                | -2.74569800 | -0.25332600 | 3.91338900  |
| C          | -2.08863300  | -2.32974600 | -1.85094900 | H                | -5.40946500 | -1.93448000 | 0.98303100  |
| C          | 0.30620700   | -2.35908500 | -1.66853500 | H                | -4.93331300 | -1.29246100 | 3.33884800  |
| C          | -2.02520200  | -3.29143700 | -2.85938300 | C                | -0.33078000 | -1.57874300 | -1.00011100 |
| H          | -3.05337400  | -1.93697200 | -1.54605000 | H                | -0.20054200 | -1.45043800 | -2.08228800 |
| C          | 0.37627900   | -3.31914100 | -2.67976200 | C                | 1.00991500  | -1.43822700 | -0.32100100 |
| H          | 1.22169700   | -1.98648700 | -1.22500400 | H                | 1.26790800  | -2.11893700 | 0.48043100  |
| C          | -0.79110800  | -3.79333600 | -3.27851200 | C                | -0.85643300 | -2.99794300 | -0.85471200 |
| H          | -2.94321700  | -3.64328100 | -3.32407900 | F                | 0.02855200  | -3.86615900 | -1.39339000 |
| H          | 1.34750100   | -3.68876600 | -2.99996000 | F                | -1.03881400 | -3.36564200 | 0.42943700  |
| H          | -0.74114400  | -4.53914700 | -4.06792100 | F                | -2.02677000 | -3.16938200 | -1.50867800 |
| C          | -1.36283500  | -1.45822500 | 1.27612400  | C                | 1.82747900  | -0.42833700 | -0.65478600 |
| H          | -1.19456500  | -0.69365400 | 2.04429800  | O                | 1.46971500  | 0.46801900  | -1.65059600 |
| C          | -2.82368900  | -1.83271900 | 1.29875300  | C                | 3.16888700  | -0.15800600 | -0.10405600 |
| H          | -3.11039500  | -2.86969200 | 1.17584900  | C                | 3.86521500  | -1.13155400 | 0.63578300  |
| C          | -0.53247700  | -2.63798900 | 1.74906500  | C                | 3.78630000  | 1.08571500  | -0.30543000 |
| F          | -0.88252500  | -2.97290300 | 3.01578500  | C                | 5.11637700  | -0.85638600 | 1.17288600  |
| F          | -0.68527100  | -3.74939300 | 1.00066600  | H                | 3.43586400  | -2.11911500 | 0.77527000  |
| F          | 0.79728100   | -2.36125200 | 1.78589400  | C                | 5.04465200  | 1.35062700  | 0.23409900  |
| C          | -3.74659600  | -0.86576900 | 1.37941100  | H                | 3.28140400  | 1.84343700  | -0.89417500 |
| O          | -3.34105100  | 0.45236400  | 1.55614000  | C                | 5.73171100  | 0.39229000  | 0.98651900  |
| C          | -5.21525000  | -1.01830300 | 1.37885500  | H                | 5.63400300  | -1.62918400 | 1.73689400  |
| C          | -5.82963600  | -2.27585500 | 1.22579700  | H                | 5.50066400  | 2.32277100  | 0.06240800  |
| C          | -6.04580100  | 0.10291800  | 1.53269500  | C                | 7.08911300  | 0.68091100  | 1.58198000  |
| C          | -7.21327100  | -2.39844300 | 1.22134400  | H                | 7.81013000  | -0.10776000 | 1.33566900  |
| H          | -5.22357200  | -3.16871200 | 1.10599800  | H                | 7.49246600  | 1.63104100  | 1.21805500  |
| C          | -7.43439100  | -0.03130000 | 1.52905200  | H                | 7.03931500  | 0.73920300  | 2.67718300  |
| H          | -5.59604300  | 1.08031500  | 1.66487400  |                  |             |             |             |
| C          | -8.04691600  | -1.27808800 | 1.37120900  | <b>TS2-R-exo</b> |             |             |             |
| H          | -7.65829600  | -3.38376800 | 1.09903200  | Ni               | -0.92855400 | 0.07832200  | 0.19949900  |
| H          | -8.05204700  | 0.85548800  | 1.65307600  | C                | -1.82857600 | 2.11365200  | -0.93794400 |
| C          | -9.55033100  | -1.42260600 | 1.34967700  | C                | -2.43150300 | 1.18819500  | -0.13358700 |
| H          | -9.88913300  | -2.20313600 | 2.04180800  | C                | -0.41850200 | 1.68998400  | -0.95044700 |
| H          | -10.04522200 | -0.48728700 | 1.63011700  | O                | 0.40717700  | 1.53812800  | -1.82314200 |
| H          | -9.91156100  | -1.70149700 | 0.35090200  | C                | -2.34268800 | 3.25699300  | -1.72324700 |
|            |              |             |             | C                | -1.63440400 | 3.71727600  | -2.84946000 |
| <b>3a'</b> |              |             |             | C                | -3.52569200 | 3.92653900  | -1.35718500 |
| C          | -0.88452100  | 0.81823700  | -0.86830300 | C                | -2.10488400 | 4.79829300  | -3.59330500 |
| C          | -1.21435700  | -0.43645800 | -0.47180900 | H                | -0.71344200 | 3.22028800  | -3.13541700 |
| C          | 0.23299100   | 1.07434800  | -1.83608100 | C                | -3.99065000 | 5.00709000  | -2.10375300 |
| O          | 0.14659400   | 1.84322000  | -2.76040500 | H                | -4.07429700 | 3.60477200  | -0.47908100 |
| C          | -1.60996900  | 2.05877800  | -0.46378900 | C                | -3.28607700 | 5.44650700  | -3.22746500 |
| C          | -2.99791400  | 2.18445600  | -0.61939100 | H                | -1.54428200 | 5.13604400  | -4.46138000 |
| C          | -0.89139100  | 3.14458200  | 0.06212000  | H                | -4.90440000 | 5.51266400  | -1.80156800 |
| C          | -3.65128000  | 3.35771900  | -0.24311500 | H                | -3.65124700 | 6.29020700  | -3.80731500 |
| H          | -3.56466600  | 1.36334700  | -1.04502300 | C                | -3.86935000 | 1.04544100  | 0.14309500  |
| C          | -1.54476300  | 4.31524700  | 0.44277300  | C                | -4.75203700 | 0.65609800  | -0.88395000 |
| H          | 0.18713700   | 3.06962000  | 0.17749700  | C                | -4.40393200 | 1.27762700  | 1.42468500  |
| C          | -2.92882700  | 4.42525100  | 0.29243000  | C                | -6.11715500 | 0.51505300  | -0.64020800 |
| H          | -4.72684500  | 3.43856000  | -0.37545000 | H                | -4.35518400 | 0.47499400  | -1.87900700 |
| H          | -0.97205000  | 5.14241000  | 0.85340300  | C                | -5.77201600 | 1.14232500  | 1.66331000  |
| H          | -3.43918000  | 5.33913900  | 0.58422200  | H                | -3.74216600 | 1.56542800  | 2.23446300  |
| C          | -2.26389400  | -0.68751700 | 0.56337700  | C                | -6.63581300 | 0.75989200  | 0.63379800  |
| C          | -2.00877600  | -0.32008400 | 1.89412500  | H                | -6.77878000 | 0.21818900  | -1.45021900 |
| C          | -3.49858900  | -1.27658200 | 0.25022400  | H                | -6.16349800 | 1.33964700  | 2.65827400  |
| C          | -2.96156200  | -0.54153200 | 2.88812900  | H                | -7.70132800 | 0.65694400  | 0.82162600  |
| H          | -1.05897300  | 0.14327500  | 2.14404700  | C                | -0.48141900 | 0.93722300  | 2.01325000  |
| C          | -4.45461000  | -1.48623600 | 1.24408200  | H                | -1.15539400 | 1.78958900  | 1.98162400  |

|   |             |             |             |                   |             |             |             |
|---|-------------|-------------|-------------|-------------------|-------------|-------------|-------------|
| C | 0.90155900  | 1.26716000  | 1.94957500  | H                 | 4.22788300  | -0.72342400 | -3.47389500 |
| H | 1.63969500  | 0.64685700  | 2.44436000  | C                 | 5.26945500  | -4.07015100 | -1.82534500 |
| C | -0.88420200 | -0.05598300 | 3.06656000  | H                 | 3.30638100  | -4.07051200 | -0.93961300 |
| F | -0.24284500 | -1.24466800 | 2.94274900  | C                 | 6.17039400  | -3.39130100 | -2.64940000 |
| F | -2.21854000 | -0.32421000 | 3.03882000  | H                 | 6.48594100  | -1.65166900 | -3.88644400 |
| F | -0.62078000 | 0.39266400  | 4.31916300  | H                 | 5.55397100  | -5.01459500 | -1.36947000 |
| C | 1.28466300  | 2.33003900  | 1.12169200  | H                 | 7.15715100  | -3.80596800 | -2.83686400 |
| O | 0.41896600  | 2.86928900  | 0.32810100  |                   |             |             |             |
| C | 2.67831000  | 2.84156200  | 1.07347300  |                   |             |             |             |
| C | 3.58077400  | 2.67462700  | 2.13706100  |                   |             |             |             |
| C | 3.11358500  | 3.53783800  | -0.06654000 |                   |             |             |             |
| C | 4.87838000  | 3.17306300  | 2.05287100  |                   |             |             |             |
| H | 3.25981000  | 2.16587300  | 3.04136200  |                   |             |             |             |
| C | 4.41493200  | 4.02596400  | -0.14651200 |                   |             |             |             |
| H | 2.41313800  | 3.67689700  | -0.88326500 |                   |             |             |             |
| C | 5.32083200  | 3.85750000  | 0.91125400  |                   |             |             |             |
| H | 5.55873400  | 3.03670700  | 2.89107700  |                   |             |             |             |
| H | 4.73522400  | 4.55231900  | -1.04348700 |                   |             |             |             |
| C | 6.71798100  | 4.42795500  | 0.83931800  |                   |             |             |             |
| H | 7.07739700  | 4.48064400  | -0.19420800 |                   |             |             |             |
| H | 7.42907700  | 3.82605100  | 1.41599200  |                   |             |             |             |
| H | 6.75268600  | 5.44776000  | 1.24654100  |                   |             |             |             |
| C | -5.23331800 | -2.91785800 | 1.21412600  |                   |             |             |             |
| C | -3.99963300 | -2.33752100 | 1.02809200  |                   |             |             |             |
| C | -3.08812600 | -2.89036800 | 0.09054900  |                   |             |             |             |
| C | -3.46429300 | -4.06672800 | -0.64426300 |                   |             |             |             |
| C | -4.74691800 | -4.63452000 | -0.42958500 |                   |             |             |             |
| C | -5.61304800 | -4.06965500 | 0.47923800  |                   |             |             |             |
| H | -5.92701600 | -2.48419600 | 1.92782200  |                   |             |             |             |
| H | -3.69279600 | -1.46267800 | 1.58541700  |                   |             |             |             |
| C | -2.52012900 | -4.61072500 | -1.54840200 |                   |             |             |             |
| H | -5.02921100 | -5.52218000 | -0.99019100 |                   |             |             |             |
| H | -6.59345200 | -4.50911500 | 0.64039900  |                   |             |             |             |
| C | -1.28637800 | -4.01940500 | -1.68476800 |                   |             |             |             |
| C | -1.01114900 | -2.86273400 | -0.91540800 |                   |             |             |             |
| H | -2.77788100 | -5.49722600 | -2.12242700 |                   |             |             |             |
| H | -0.53144600 | -4.40839900 | -2.35770300 |                   |             |             |             |
| N | -1.87070500 | -2.30091900 | -0.07392500 |                   |             |             |             |
| C | 2.27754100  | -1.70598800 | -1.91010400 |                   |             |             |             |
| C | 2.04422600  | -0.86472700 | -0.60625000 |                   |             |             |             |
| C | 0.29877200  | -2.19768800 | -0.99819200 |                   |             |             |             |
| N | 0.60992300  | -1.12817400 | -0.34918900 |                   |             |             |             |
| O | 1.23283500  | -2.73544700 | -1.80074700 |                   |             |             |             |
| H | 1.98581000  | -1.08153900 | -2.76232700 |                   |             |             |             |
| H | 2.16614900  | 0.19356100  | -0.84007000 |                   |             |             |             |
| C | 2.92337100  | -1.23989300 | 0.57657800  |                   |             |             |             |
| C | 2.56133500  | -2.23234100 | 1.49584900  |                   |             |             |             |
| C | 4.16031000  | -0.59833100 | 0.72667000  |                   |             |             |             |
| C | 3.42319500  | -2.58254900 | 2.53734400  |                   |             |             |             |
| H | 1.59271000  | -2.71496500 | 1.41927800  |                   |             |             |             |
| C | 5.02391100  | -0.95152200 | 1.76319900  |                   |             |             |             |
| H | 4.44569600  | 0.18817700  | 0.03349700  |                   |             |             |             |
| C | 4.65869000  | -1.94722300 | 2.67166400  |                   |             |             |             |
| H | 3.12257300  | -3.34763600 | 3.24823800  |                   |             |             |             |
| H | 5.97623400  | -0.43874700 | 1.86595200  |                   |             |             |             |
| H | 5.32778600  | -2.21874200 | 3.48386200  |                   |             |             |             |
| C | 3.62084100  | -2.32718700 | -2.16625500 |                   |             |             |             |
| C | 4.52309400  | -1.65835800 | -3.00256800 |                   |             |             |             |
| C | 4.00296500  | -3.54074900 | -1.58056400 |                   |             |             |             |
| C | 5.79517500  | -2.18226200 | -3.23692300 |                   |             |             |             |
|   |             |             |             | <b>TS2-S-endo</b> |             |             |             |
|   |             |             |             | Ni                | -0.25650300 | 0.22558100  | -0.40707400 |
|   |             |             |             | C                 | -0.96223800 | -2.09265600 | 0.47388200  |
|   |             |             |             | C                 | -1.04707500 | -0.85134900 | 1.01550200  |
|   |             |             |             | C                 | -0.31533800 | -1.93335500 | -0.85365800 |
|   |             |             |             | O                 | 0.60000400  | -2.42566400 | -1.43782200 |
|   |             |             |             | C                 | -1.31514100 | -3.45383900 | 0.95094900  |
|   |             |             |             | C                 | -1.53682700 | -4.49639800 | 0.03149500  |
|   |             |             |             | C                 | -1.42564200 | -3.74235200 | 2.32429800  |
|   |             |             |             | C                 | -1.86993700 | -5.77772700 | 0.47042300  |
|   |             |             |             | H                 | -1.45368800 | -4.29723600 | -1.03239500 |
|   |             |             |             | C                 | -1.76155100 | -5.02373400 | 2.75746400  |
|   |             |             |             | H                 | -1.24290000 | -2.95999300 | 3.05237400  |
|   |             |             |             | C                 | -1.98707200 | -6.04855900 | 1.83486200  |
|   |             |             |             | H                 | -2.03846100 | -6.56616400 | -0.25889100 |
|   |             |             |             | H                 | -1.84118600 | -5.22332800 | 3.82331600  |
|   |             |             |             | H                 | -2.24629000 | -7.04726200 | 2.17644000  |
|   |             |             |             | C                 | -1.59862300 | -0.47417000 | 2.32091700  |
|   |             |             |             | C                 | -0.78008300 | 0.04032100  | 3.34554300  |
|   |             |             |             | C                 | -2.98501000 | -0.56016400 | 2.56625100  |
|   |             |             |             | C                 | -1.32036700 | 0.43070900  | 4.57055700  |
|   |             |             |             | H                 | 0.29051100  | 0.12026500  | 3.17661400  |
|   |             |             |             | C                 | -3.52273500 | -0.15633400 | 3.78751700  |
|   |             |             |             | H                 | -3.63479200 | -0.94887300 | 1.78699500  |
|   |             |             |             | C                 | -2.69533300 | 0.33804300  | 4.79909700  |
|   |             |             |             | H                 | -0.66388300 | 0.81264000  | 5.34897400  |
|   |             |             |             | H                 | -4.59501600 | -0.23407000 | 3.95139900  |
|   |             |             |             | H                 | -3.11642600 | 0.64876300  | 5.75148700  |
|   |             |             |             | C                 | -0.21925800 | 0.75389400  | -2.31706500 |
|   |             |             |             | H                 | 0.28322200  | -0.03570900 | -2.87166700 |
|   |             |             |             | C                 | -1.59447100 | 0.57980800  | -1.93168500 |
|   |             |             |             | H                 | -2.18188000 | 1.47959500  | -1.79516500 |
|   |             |             |             | C                 | 0.18881200  | 2.11619000  | -2.76937500 |
|   |             |             |             | F                 | -0.59950100 | 3.10652400  | -2.27419200 |
|   |             |             |             | F                 | 0.15684900  | 2.24664900  | -4.12335500 |
|   |             |             |             | F                 | 1.46615400  | 2.44447300  | -2.40711500 |
|   |             |             |             | C                 | -2.32361100 | -0.64524100 | -1.91715100 |
|   |             |             |             | O                 | -1.75967800 | -1.79905500 | -1.94703600 |
|   |             |             |             | C                 | -3.80459200 | -0.63747700 | -1.81782500 |
|   |             |             |             | C                 | -4.58579300 | 0.44581000  | -2.25593000 |
|   |             |             |             | C                 | -4.46055300 | -1.76913600 | -1.30134900 |
|   |             |             |             | C                 | -5.97408000 | 0.40201600  | -2.16329900 |
|   |             |             |             | H                 | -4.11083300 | 1.31359500  | -2.70356800 |
|   |             |             |             | C                 | -5.84781900 | -1.80010400 | -1.20370100 |
|   |             |             |             | H                 | -3.86655400 | -2.61635500 | -0.97650400 |
|   |             |             |             | C                 | -6.63046300 | -0.71585700 | -1.62839100 |
|   |             |             |             | H                 | -6.56043200 | 1.24493700  | -2.52198400 |
|   |             |             |             | H                 | -6.33509300 | -2.68211000 | -0.79433500 |
|   |             |             |             | C                 | -8.13446100 | -0.74532200 | -1.49778900 |
|   |             |             |             | H                 | -8.45281000 | -0.36909100 | -0.51599100 |
|   |             |             |             | H                 | -8.52532600 | -1.76359300 | -1.59630400 |
|   |             |             |             | H                 | -8.61590000 | -0.11991100 | -2.25698800 |

|                  |             |             |             |    |             |             |             |
|------------------|-------------|-------------|-------------|----|-------------|-------------|-------------|
| C                | -3.09452900 | 4.27340700  | 0.83184500  | H  | -1.63820100 | -6.32871500 | -0.61333800 |
| C                | -2.22886100 | 3.22652600  | 0.61214700  | H  | 0.47913300  | -4.99319000 | -0.50358800 |
| C                | -0.84100100 | 3.38297200  | 0.86842900  | N  | -1.71469900 | -2.49932900 | 0.13770600  |
| C                | -0.36247600 | 4.63076200  | 1.38978500  | C  | 2.82286700  | -1.89220900 | -0.17308900 |
| C                | -1.28161300 | 5.69261600  | 1.59261300  | C  | 2.07450900  | -0.68158400 | 0.47454700  |
| C                | -2.61870400 | 5.51876300  | 1.31479900  | C  | 0.64044100  | -2.33093900 | 0.02843500  |
| H                | -4.15613700 | 4.14539100  | 0.64066900  | N  | 0.66337700  | -1.05426900 | 0.20978700  |
| H                | -2.57759400 | 2.26091800  | 0.26548900  | O  | 1.82615800  | -2.96302700 | -0.05109900 |
| C                | 1.01699100  | 4.73301500  | 1.69957400  | H  | 2.91397200  | -1.69528000 | -1.24843400 |
| H                | -0.91293000 | 6.63950600  | 1.97909800  | H  | 2.31354400  | 0.23197600  | -0.06949000 |
| H                | -3.31826200 | 6.33397800  | 1.47628000  | C  | 2.34902700  | -0.46596300 | 1.95445300  |
| C                | 1.83920100  | 3.64784300  | 1.51597000  | C  | 1.67172700  | -1.17109500 | 2.95571800  |
| C                | 1.27623200  | 2.46681100  | 0.97266200  | C  | 3.34926600  | 0.44152900  | 2.32568900  |
| H                | 1.40784600  | 5.66644900  | 2.09658000  | C  | 1.99405600  | -0.97868800 | 4.30093700  |
| H                | 2.89318400  | 3.67370000  | 1.76728600  | H  | 0.87260500  | -1.85853800 | 2.69442800  |
| N                | -0.00202900 | 2.33523800  | 0.63794100  | C  | 3.67613600  | 0.63036200  | 3.66723400  |
| C                | 3.68250400  | -0.21268800 | 1.29744200  | H  | 3.86409600  | 1.01333900  | 1.55790800  |
| C                | 2.72536000  | -0.80905700 | 0.19377400  | C  | 2.99948800  | -0.08096300 | 4.66072500  |
| C                | 2.08015800  | 1.25589300  | 0.77707600  | H  | 1.45298400  | -1.52813900 | 5.06690100  |
| N                | 1.64105400  | 0.20297600  | 0.17927600  | H  | 4.45158000  | 1.34207600  | 3.93762300  |
| O                | 3.32056900  | 1.20648300  | 1.30344900  | H  | 3.24793000  | 0.07104600  | 5.70771400  |
| H                | 3.35801100  | -0.60332000 | 2.27006100  | C  | 4.15527900  | -2.31586900 | 0.37651100  |
| H                | 2.31007200  | -1.75141700 | 0.55663100  | C  | 5.31442800  | -1.76588400 | -0.18549300 |
| C                | 3.36485000  | -1.05727700 | -1.16138100 | C  | 4.27109500  | -3.21997500 | 1.43872900  |
| C                | 3.45630300  | -0.06479300 | -2.14128100 | C  | 6.57187100  | -2.10316200 | 0.31590000  |
| C                | 3.93008700  | -2.31380400 | -1.41347800 | H  | 5.23208700  | -1.06859200 | -1.01680400 |
| C                | 4.10357400  | -0.32442300 | -3.35185200 | C  | 5.52976600  | -3.56625300 | 1.93023900  |
| H                | 2.99519300  | 0.90097700  | -1.97855800 | H  | 3.37752900  | -3.65592700 | 1.87229800  |
| C                | 4.58424900  | -2.57113700 | -2.61670100 | C  | 6.68226300  | -3.00712600 | 1.37406600  |
| H                | 3.84934700  | -3.09959400 | -0.66643800 | H  | 7.46346200  | -1.66776400 | -0.12691300 |
| C                | 4.67319700  | -1.57499000 | -3.59188500 | H  | 5.60941600  | -4.27324000 | 2.75157800  |
| H                | 4.15437200  | 0.45412800  | -4.10856100 | H  | 7.66112100  | -3.27800500 | 1.76033600  |
| H                | 5.01303500  | -3.55314300 | -2.79772400 | Ni | -0.94728700 | 0.11520800  | -0.08726000 |
| H                | 5.17448100  | -1.77669900 | -4.53482500 | C  | -1.69498400 | 2.41344700  | 0.58330600  |
| C                | 5.16914000  | -0.38761800 | 1.16166800  | C  | -2.39594000 | 1.30995200  | 0.18572600  |
| C                | 5.79837800  | -1.41488800 | 1.87478700  | C  | -0.28922300 | 1.98421100  | 0.51861000  |
| C                | 5.93787000  | 0.43900700  | 0.33262800  | O  | 0.64514000  | 2.02385400  | 1.27588900  |
| C                | 7.17201900  | -1.62760600 | 1.74999000  | C  | -2.10604700 | 3.74886500  | 1.06889500  |
| H                | 5.21136000  | -2.05112900 | 2.53385700  | C  | -1.26363400 | 4.48781400  | 1.92028800  |
| C                | 7.31204600  | 0.23409100  | 0.21750800  | C  | -3.32742600 | 4.32320900  | 0.66965400  |
| H                | 5.45882500  | 1.24283100  | -0.21588500 | C  | -1.64140100 | 5.75187100  | 2.37093400  |
| C                | 7.93217100  | -0.80136800 | 0.92120000  | H  | -0.31308600 | 4.06300000  | 2.22600100  |
| H                | 7.64701500  | -2.42989700 | 2.30791500  | C  | -3.69947400 | 5.58705200  | 1.12240000  |
| H                | 7.89969400  | 0.88337500  | -0.42569300 | H  | -3.98019900 | 3.77992900  | -0.00480200 |
| H                | 9.00317700  | -0.95930100 | 0.82764400  | C  | -2.86091500 | 6.30653700  | 1.97766200  |
|                  |             |             |             | H  | -0.97844400 | 6.30557300  | 3.03095200  |
|                  |             |             |             | H  | -4.64542400 | 6.01463600  | 0.79971100  |
|                  |             |             |             | H  | -3.15307000 | 7.29289400  | 2.32850600  |
|                  |             |             |             | C  | -3.85641100 | 1.13084100  | 0.22049100  |
|                  |             |             |             | C  | -4.53081500 | 1.12098300  | 1.45895100  |
|                  |             |             |             | C  | -4.61434700 | 0.93323500  | -0.94904200 |
|                  |             |             |             | C  | -5.91025300 | 0.92722400  | 1.52200600  |
|                  |             |             |             | H  | -3.95995300 | 1.27046900  | 2.37102100  |
|                  |             |             |             | C  | -5.99578000 | 0.75135500  | -0.88276200 |
|                  |             |             |             | H  | -4.11510900 | 0.91611400  | -1.91111900 |
|                  |             |             |             | C  | -6.65152500 | 0.74484600  | 0.35116200  |
|                  |             |             |             | H  | -6.40788500 | 0.92556300  | 2.48860500  |
|                  |             |             |             | H  | -6.56076000 | 0.61027700  | -1.80070200 |
|                  |             |             |             | H  | -7.72787500 | 0.60218400  | 0.39985800  |
|                  |             |             |             | C  | -0.82606700 | 0.48696400  | -2.10341000 |
| <b>TS2-S-exo</b> |             |             |             |    |             |             |             |
| C                | -5.29328200 | -3.21677900 | 0.26671700  |    |             |             |             |
| C                | -4.10409100 | -2.52597900 | 0.31069200  |    |             |             |             |
| C                | -2.87757500 | -3.20440000 | 0.08290700  |    |             |             |             |
| C                | -2.89753400 | -4.61539600 | -0.18710400 |    |             |             |             |
| C                | -4.14260300 | -5.29521800 | -0.22460300 |    |             |             |             |
| C                | -5.31532800 | -4.60921100 | -0.00261400 |    |             |             |             |
| H                | -6.22532500 | -2.68640600 | 0.43719600  |    |             |             |             |
| H                | -4.07413100 | -1.46261700 | 0.51217900  |    |             |             |             |
| C                | -1.65659800 | -5.26238200 | -0.40236400 |    |             |             |             |
| H                | -4.15241700 | -6.36264400 | -0.43070000 |    |             |             |             |
| H                | -6.26592700 | -5.13433900 | -0.03343900 |    |             |             |             |
| C                | -0.49058700 | -4.53740000 | -0.34302700 |    |             |             |             |
| C                | -0.57878500 | -3.14955800 | -0.06825400 |    |             |             |             |





|            |             |             |             |    |             |             |             |
|------------|-------------|-------------|-------------|----|-------------|-------------|-------------|
| C          | 5.96882000  | -0.56626900 | -0.98788700 | H  | -2.93899700 | -2.13033800 | -0.03289100 |
| H          | 4.18123500  | 0.62619200  | -1.00275200 | C  | 0.57434700  | -5.07467400 | -0.39432800 |
| C          | 6.56845900  | -1.76595900 | -0.59354200 | H  | -1.43789200 | -6.88190400 | -0.14540700 |
| H          | 6.26032700  | -3.64497100 | 0.42360600  | H  | -3.84226300 | -6.33972600 | 0.10961500  |
| H          | 6.54099800  | 0.16805300  | -1.55024700 | C  | 1.45186500  | -4.02511600 | -0.52001100 |
| H          | 7.60822300  | -1.96785700 | -0.83614600 | C  | 0.93587500  | -2.71021200 | -0.45936800 |
| C          | 4.38481600  | 3.26794900  | 1.12489500  | H  | 0.92540600  | -6.10285100 | -0.42947700 |
| C          | 3.34211400  | 2.41342700  | 0.82909200  | H  | 2.51560900  | -4.17364600 | -0.66622600 |
| C          | 2.22317300  | 2.87517700  | 0.09632900  | N  | -0.35241000 | -2.40742500 | -0.28351000 |
| C          | 2.17063200  | 4.25457800  | -0.29451700 | C  | 3.60119800  | -0.34639800 | -1.17414600 |
| C          | 3.26666400  | 5.09843200  | 0.01057100  | C  | 2.43747400  | 0.60100900  | -0.70039200 |
| C          | 4.35809500  | 4.61622000  | 0.70258800  | C  | 1.79772200  | -1.54092500 | -0.61540900 |
| H          | 5.23294100  | 2.89808400  | 1.69379700  | N  | 1.30949100  | -0.34998200 | -0.63130300 |
| H          | 3.34552000  | 1.38200300  | 1.16153800  | O  | 3.12880500  | -1.67677600 | -0.76183300 |
| C          | 1.00555900  | 4.73136600  | -0.95804100 | H  | 3.59562300  | -0.36218200 | -2.27093500 |
| H          | 3.22229400  | 6.13998000  | -0.29817600 | H  | 2.20853400  | 1.33968500  | -1.46933600 |
| H          | 5.18971600  | 5.27418700  | 0.93790900  | C  | 2.64264300  | 1.33011200  | 0.61612100  |
| C          | -0.05527900 | 3.88326600  | -1.14999800 | C  | 2.49340600  | 0.69137900  | 1.85380100  |
| C          | 0.06709000  | 2.53786200  | -0.73985700 | C  | 3.00859500  | 2.68095500  | 0.59276700  |
| H          | 0.95735500  | 5.77001800  | -1.27326500 | C  | 2.72046800  | 1.38609000  | 3.04269700  |
| H          | -0.98464400 | 4.21213800  | -1.60208000 | H  | 2.18084500  | -0.34827400 | 1.89470400  |
| N          | 1.19788000  | 2.00582200  | -0.20877200 | C  | 3.24044700  | 3.37615400  | 1.77963200  |
| C          | -2.91543400 | 0.57937300  | -1.42932000 | H  | 3.09554400  | 3.19391300  | -0.36099800 |
| C          | -2.12667300 | -0.32065000 | -0.38254200 | C  | 3.09846300  | 2.72958000  | 3.00872500  |
| C          | -1.01795500 | 1.59081400  | -0.78915100 | H  | 2.59533500  | 0.87842700  | 3.99551100  |
| N          | -0.88047400 | 0.43758700  | -0.20678300 | H  | 3.51908200  | 4.42582200  | 1.74371700  |
| O          | -2.19340000 | 1.85142600  | -1.39664700 | H  | 3.27067300  | 3.27189100  | 3.93458200  |
| H          | -2.74178800 | 0.16144600  | -2.42745200 | C  | 4.99939100  | -0.09114400 | -0.68344900 |
| H          | -1.89339300 | -1.27589400 | -0.86323800 | C  | 5.84391800  | 0.71972700  | -1.45179700 |
| C          | -2.82332100 | -0.61362300 | 0.93555100  | C  | 5.47365500  | -0.62071700 | 0.52241600  |
| C          | -2.65190700 | 0.20070300  | 2.06053300  | C  | 7.13580300  | 1.01366800  | -1.01489600 |
| C          | -3.66882900 | -1.72701500 | 1.02662000  | H  | 5.49010000  | 1.12229700  | -2.39858800 |
| C          | -3.32233400 | -0.08765100 | 3.25054400  | C  | 6.76993800  | -0.33738000 | 0.95251100  |
| H          | -1.97223000 | 1.04581200  | 2.01333500  | H  | 4.83142400  | -1.26238500 | 1.11585100  |
| C          | -4.34461200 | -2.01228900 | 2.21262500  | C  | 7.60257800  | 0.48368200  | 0.18915700  |
| H          | -3.79738600 | -2.37601900 | 0.16319600  | H  | 7.77900500  | 1.64654700  | -1.62013000 |
| C          | -4.17298400 | -1.19112000 | 3.32913400  | H  | 7.12913500  | -0.75823600 | 1.88772400  |
| H          | -3.17005500 | 0.54635000  | 4.11974800  | H  | 8.61114600  | 0.70426500  | 0.52792900  |
| H          | -4.99649800 | -2.88008900 | 2.26753700  | Ni | -0.58410600 | -0.09137300 | -0.41042500 |
| H          | -4.69084600 | -1.41674500 | 4.25743200  | C  | -2.05302200 | 1.90539800  | -0.53793900 |
| C          | -4.38992100 | 0.80231200  | -1.23080300 | C  | -2.34531100 | 0.62387700  | -0.11121300 |
| C          | -5.30140100 | 0.01951200  | -1.94883700 | C  | -0.65927800 | 1.70879300  | -0.93277000 |
| C          | -4.87356100 | 1.76138600  | -0.33220700 | O  | 0.17075100  | 2.43685400  | -1.45825500 |
| C          | -6.67542500 | 0.17797400  | -1.76197800 | C  | -2.81751100 | 3.16966500  | -0.59085300 |
| H          | -4.93486800 | -0.71569100 | -2.66233100 | C  | -2.37415900 | 4.21398100  | -1.42693500 |
| C          | -6.24623700 | 1.92795500  | -0.15377800 | C  | -3.96746000 | 3.38855200  | 0.19271600  |
| H          | -4.17405900 | 2.38256400  | 0.21738700  | C  | -3.07040700 | 5.42015400  | -1.49266600 |
| C          | -7.15071200 | 1.13444700  | -0.86374900 | H  | -1.47252000 | 4.06919800  | -2.01153000 |
| H          | -7.37162900 | -0.43680100 | -2.32591000 | C  | -4.65790400 | 4.59707600  | 0.12540300  |
| H          | -6.61054800 | 2.67837600  | 0.54253000  | H  | -4.31514400 | 2.61166900  | 0.86417500  |
| H          | -8.21995200 | 1.26571700  | -0.72164700 | C  | -4.21730000 | 5.61779400  | -0.72109800 |
|            |             |             |             | H  | -2.71225400 | 6.21068500  | -2.14786400 |
|            |             |             |             | H  | -5.54219200 | 4.74388000  | 0.74099500  |
|            |             |             |             | H  | -4.75851900 | 6.55923700  | -0.77249700 |
|            |             |             |             | C  | -3.64507100 | 0.14163400  | 0.38214200  |
|            |             |             |             | C  | -3.79198000 | -0.29263700 | 1.71433800  |
|            |             |             |             | C  | -4.76264600 | 0.04632400  | -0.47155700 |
|            |             |             |             | C  | -5.01257700 | -0.78187200 | 2.17969500  |
|            |             |             |             | H  | -2.93540300 | -0.23771800 | 2.38142000  |
|            |             |             |             | C  | -5.97573600 | -0.46408100 | -0.00947100 |
| <b>CP9</b> |             |             |             |    |             |             |             |
| C          | -3.53218800 | -4.19161600 | 0.05224600  |    |             |             |             |
| C          | -2.62233800 | -3.16350900 | -0.05154100 |    |             |             |             |
| C          | -1.23927900 | -3.44338600 | -0.18850300 |    |             |             |             |
| C          | -0.80777100 | -4.81450600 | -0.23029600 |    |             |             |             |
| C          | -1.77294300 | -5.84811200 | -0.11562800 |    |             |             |             |
| C          | -3.10826400 | -5.54346700 | 0.02408200  |    |             |             |             |
| H          | -4.58737300 | -3.95839800 | 0.15882700  |    |             |             |             |

|             |             |             |             |            |             |             |             |
|-------------|-------------|-------------|-------------|------------|-------------|-------------|-------------|
| H           | -4.66784900 | 0.37588000  | -1.50260500 | C          | -0.88522800 | 4.58098700  | -0.22020500 |
| C           | -6.10999900 | -0.87660700 | 1.31938100  | C          | 1.38026900  | 5.63609200  | -1.42573600 |
| H           | -5.10457700 | -1.09765200 | 3.21616500  | H          | 1.57128900  | 3.74294200  | -2.40758300 |
| H           | -6.82286600 | -0.53019300 | -0.68805900 | C          | -0.49293300 | 5.88854900  | 0.05205900  |
| H           | -7.05852400 | -1.26567200 | 1.68023600  | H          | -1.77547500 | 4.15729300  | 0.23234300  |
| <b>CP10</b> |             |             |             | C          | 0.64731900  | 6.44394700  | -0.54604500 |
| C           | -3.23327300 | -4.36482800 | 1.68896500  | H          | 2.26286300  | 6.04417600  | -1.91532500 |
| C           | -2.25844000 | -3.46468100 | 1.31016900  | H          | -1.08224400 | 6.49366100  | 0.73921900  |
| C           | -0.99275400 | -3.91386800 | 0.85961400  | C          | 1.05004900  | 7.87637500  | -0.28125300 |
| C           | -0.72707100 | -5.32541200 | 0.85827300  | H          | 0.54320400  | 8.56921700  | -0.96737800 |
| C           | -1.75505000 | -6.22345200 | 1.23765500  | H          | 0.78955100  | 8.18549700  | 0.73751900  |
| C           | -2.98892200 | -5.75538400 | 1.63918700  | H          | 2.12792600  | 8.02279300  | -0.41349800 |
| H           | -4.19713900 | -4.00085200 | 2.03388100  | C          | -4.21849100 | 0.06598800  | 0.01760900  |
| H           | -2.43379900 | -2.39944000 | 1.36140200  | C          | -3.20655900 | 0.48835600  | 0.84923000  |
| C           | 0.57992500  | -5.76756900 | 0.51447600  | C          | -2.91786400 | -0.41504100 | -0.18676000 |
| H           | -1.54826000 | -7.29064900 | 1.21525500  | O          | -2.15561900 | -1.18372600 | -0.80859300 |
| H           | -3.76889900 | -6.45279900 | 1.93134200  | C          | -5.59796800 | 0.12742600  | -0.40599900 |
| C           | 1.54726200  | -4.83946100 | 0.21593900  | C          | -6.02965300 | -0.72290200 | -1.44141300 |
| C           | 1.19562100  | -3.47342500 | 0.21032300  | C          | -6.51300300 | 1.01901200  | 0.18329100  |
| H           | 0.80144900  | -6.83121400 | 0.50930000  | C          | -7.35399300 | -0.68715500 | -1.86913600 |
| H           | 2.56394200  | -5.12438300 | -0.03235300 | H          | -5.31675800 | -1.40142300 | -1.90074600 |
| N           | -0.03750600 | -2.99374300 | 0.49433800  | C          | -7.83468600 | 1.05250200  | -0.25155600 |
| C           | 4.02126000  | -1.41273500 | -0.74193000 | H          | -6.17639900 | 1.69453400  | 0.96358400  |
| C           | 2.86813700  | -0.36240800 | -0.56771900 | C          | -8.25783600 | 0.19815900  | -1.27474200 |
| C           | 2.12916300  | -2.42997900 | -0.15393500 | H          | -7.68152100 | -1.34533800 | -2.66873400 |
| N           | 1.69949300  | -1.26485200 | -0.53044100 | H          | -8.53584300 | 1.74674400  | 0.20290100  |
| O           | 3.46240500  | -2.60771600 | -0.09813400 | H          | -9.29050700 | 0.22644300  | -1.61147800 |
| H           | 4.08270800  | -1.64968000 | -1.81101700 | C          | -2.77836500 | 1.26342700  | 1.98953900  |
| H           | 2.81982300  | 0.25901800  | -1.45927900 | C          | -1.40350900 | 1.46774200  | 2.20752700  |
| C           | 2.95581500  | 0.53162800  | 0.65812200  | C          | -3.71290600 | 1.79349300  | 2.89742600  |
| C           | 2.56850200  | 0.09534000  | 1.93220000  | C          | -0.97687400 | 2.19995000  | 3.31162500  |
| C           | 3.47301500  | 1.82630100  | 0.51935800  | H          | -0.68826100 | 1.07663600  | 1.49165600  |
| C           | 2.71575300  | 0.92879500  | 3.04329700  | C          | -3.27868500 | 2.51576500  | 4.00560000  |
| H           | 2.13798400  | -0.89311500 | 2.06125800  | H          | -4.77336400 | 1.62018300  | 2.73967300  |
| C           | 3.61827000  | 2.66159000  | 1.62631600  | C          | -1.91127900 | 2.72246500  | 4.21121800  |
| H           | 3.75899900  | 2.18620800  | -0.46563800 | H          | 0.08531000  | 2.36616700  | 3.46265400  |
| C           | 3.24431100  | 2.21292500  | 2.89477500  | H          | -4.00363600 | 2.92015100  | 4.70651200  |
| H           | 2.41525700  | 0.57187500  | 4.02512400  | H          | -1.57441600 | 3.29368500  | 5.07224700  |
| H           | 4.01340200  | 3.66503000  | 1.49568700  | H          | -1.28479600 | 0.05492000  | -2.44605700 |
| H           | 3.35898800  | 2.86135900  | 3.75942200  | C          | 0.48782800  | -0.59577600 | -3.40276400 |
| C           | 5.38883400  | -1.09567200 | -0.20695900 | F          | 0.09476900  | -0.12704400 | -4.61508400 |
| C           | 6.32941500  | -0.51440600 | -1.06656200 | F          | 1.84993500  | -0.46178800 | -3.38301800 |
| C           | 5.74359400  | -1.34602600 | 1.12429600  | F          | 0.24413900  | -1.93568700 | -3.42592500 |
| C           | 7.59908000  | -0.17053300 | -0.60135500 | <b>TS6</b> |             |             |             |
| H           | 6.06850800  | -0.33410700 | -2.10729100 | C          | 2.21058800  | 5.14764400  | 1.07987400  |
| C           | 7.01718200  | -1.01367600 | 1.58553200  | C          | 1.45854300  | 4.04560100  | 0.73702300  |
| H           | 5.02559000  | -1.81029100 | 1.79144800  | C          | 0.04711600  | 4.15290300  | 0.63159300  |
| C           | 7.94630000  | -0.42141300 | 0.72720000  | C          | -0.57867500 | 5.42234000  | 0.88256500  |
| H           | 8.31825300  | 0.28089400  | -1.27932100 | C          | 0.22952500  | 6.53293000  | 1.23586200  |
| H           | 7.28422800  | -1.21820400 | 2.61884100  | C          | 1.59655600  | 6.39833700  | 1.33528000  |
| H           | 8.93744400  | -0.16328100 | 1.09023300  | H          | 3.29108700  | 5.05920400  | 1.15047300  |
| Ni          | -0.21275100 | -1.14618800 | -0.66896000 | H          | 1.90982900  | 3.08861800  | 0.50573400  |
| C           | -0.21015700 | 0.10450000  | -2.27298300 | C          | -1.98985500 | 5.50795600  | 0.77482700  |
| C           | 0.24113000  | 1.42156100  | -1.94397500 | H          | -0.25000200 | 7.49054600  | 1.42276800  |
| H           | 1.26863800  | 1.69884700  | -2.14710200 | H          | 2.20948900  | 7.25392200  | 1.60453800  |
| C           | -0.63359500 | 2.36093000  | -1.33733100 | C          | -2.71341300 | 4.38990300  | 0.43616200  |
| O           | -1.81203600 | 2.07294800  | -0.98370700 | C          | -2.01397800 | 3.18281600  | 0.21293800  |
| C           | -0.14481600 | 3.76573300  | -1.09086800 | H          | -2.48405100 | 6.45820200  | 0.95931200  |
| C           | 0.99279200  | 4.32435700  | -1.69582800 | H          | -3.79269300 | 4.40771200  | 0.33462800  |

|    |             |             |             |             |             |             |             |
|----|-------------|-------------|-------------|-------------|-------------|-------------|-------------|
| N  | -0.68701800 | 3.04208900  | 0.31354400  | H           | 6.25174700  | -0.25888800 | 1.40638300  |
| C  | -4.36462500 | 0.56815500  | -0.68768900 | C           | 7.92529000  | 1.26503800  | -1.13515400 |
| C  | -3.00513200 | -0.20952500 | -0.63232600 | H           | 7.00008000  | 2.18291900  | -2.85517400 |
| C  | -2.69670000 | 1.95001200  | -0.16102800 | H           | 8.55910400  | 0.26577600  | 0.66995500  |
| N  | -2.04999400 | 0.92448100  | -0.61256700 | H           | 8.93772400  | 1.48977000  | -1.45982300 |
| O  | -4.02791700 | 1.83185100  | -0.01785300 | C           | 2.80093900  | -0.70952300 | 2.27661500  |
| H  | -4.55045400 | 0.82853400  | -1.73693200 | C           | 1.54297400  | -1.29127900 | 2.51773000  |
| H  | -2.87777700 | -0.77274400 | -1.55262000 | C           | 3.78534900  | -0.76066400 | 3.28158200  |
| C  | -2.82239900 | -1.14103400 | 0.55362800  | C           | 1.28623500  | -1.92446600 | 3.73188200  |
| C  | -2.50251100 | -0.67321700 | 1.83487800  | H           | 0.78543700  | -1.26115000 | 1.74051800  |
| C  | -3.03041200 | -2.51428100 | 0.37087600  | C           | 3.51708000  | -1.38061100 | 4.49868500  |
| C  | -2.41680600 | -1.55761700 | 2.91198100  | H           | 4.75181800  | -0.29707200 | 3.10665900  |
| H  | -2.30949300 | 0.38294500  | 1.99773400  | C           | 2.26866400  | -1.96889900 | 4.72438400  |
| C  | -2.94051100 | -3.40043200 | 1.44385400  | H           | 0.31730000  | -2.38553600 | 3.89779600  |
| H  | -3.26409900 | -2.89283400 | -0.62110300 | H           | 4.28153300  | -1.41060100 | 5.27046900  |
| C  | -2.63872000 | -2.92308200 | 2.72063000  | H           | 2.06419900  | -2.46154100 | 5.67132600  |
| H  | -2.17301200 | -1.17675800 | 3.90020800  | H           | 1.08901800  | 0.41671700  | -2.68062100 |
| H  | -3.09897800 | -4.46264300 | 1.28065000  | C           | -0.83527700 | 0.38577900  | -3.52266400 |
| H  | -2.57103800 | -3.61135600 | 3.55888300  | F           | -0.34537600 | 0.05774400  | -4.74456900 |
| C  | -5.59294900 | -0.05709100 | -0.08981800 | F           | -2.06182900 | -0.22145600 | -3.45026200 |
| C  | -6.42810800 | -0.81852000 | -0.91718200 | F           | -1.08414000 | 1.72365500  | -3.56600000 |
| C  | -5.91444200 | 0.07950700  | 1.26601400  |             |             |             |             |
| C  | -7.55737900 | -1.45044700 | -0.39579800 | <b>CP11</b> |             |             |             |
| H  | -6.19575500 | -0.91480900 | -1.97566300 | Ni          | 0.22465900  | -0.66567000 | -0.28316800 |
| C  | -7.05047900 | -0.54247500 | 1.78384500  | C           | -0.04084300 | 0.74088600  | -1.60535000 |
| H  | -5.28123400 | 0.68062800  | 1.90936600  | C           | -0.13522800 | 1.99860400  | -0.84217800 |
| C  | -7.87164800 | -1.31241300 | 0.95729200  | H           | 0.75483200  | 2.61545500  | -0.81185300 |
| H  | -8.19568600 | -2.03939300 | -1.04862700 | C           | -1.20964000 | 2.41485700  | -0.12756000 |
| H  | -7.29401500 | -0.42516100 | 2.83628900  | O           | -2.40478000 | 1.76224800  | -0.06827900 |
| H  | -8.75538300 | -1.79636200 | 1.36405500  | C           | -1.24063300 | 3.68454800  | 0.63719900  |
| Ni | -0.15073600 | 1.10305000  | -0.80678900 | C           | -0.07428700 | 4.40575600  | 0.95690400  |
| C  | 0.10964700  | 0.00996100  | -2.41823100 | C           | -2.46872900 | 4.21799600  | 1.06555700  |
| C  | 0.18980400  | -1.39294800 | -2.06704000 | C           | -0.14155800 | 5.60862000  | 1.65222500  |
| H  | -0.69400600 | -2.01423900 | -2.15854000 | H           | 0.90074300  | 4.01744900  | 0.67971200  |
| C  | 1.36365900  | -1.92622500 | -1.54968600 | C           | -2.52657600 | 5.42481100  | 1.76070900  |
| O  | 2.43514300  | -1.22363600 | -1.33036300 | H           | -3.38107800 | 3.67898100  | 0.83904300  |
| C  | 1.45319100  | -3.38629500 | -1.22113800 | C           | -1.36819700 | 6.14657000  | 2.06894400  |
| C  | 0.57097100  | -4.35101500 | -1.73704300 | H           | 0.78051500  | 6.13885900  | 1.88370400  |
| C  | 2.48417600  | -3.83482100 | -0.37952000 | H           | -3.49544600 | 5.81378700  | 2.06821000  |
| C  | 0.70045900  | -5.69725600 | -1.40243400 | C           | -1.42849300 | 7.43981400  | 2.84802900  |
| H  | -0.21157000 | -4.05354900 | -2.42867400 | H           | -0.69897100 | 8.16863200  | 2.47571200  |
| C  | 2.60808100  | -5.18066400 | -0.04448200 | H           | -2.42192200 | 7.89725800  | 2.78757600  |
| H  | 3.18619400  | -3.10183200 | 0.00201100  | H           | -1.20811300 | 7.27986400  | 3.91274900  |
| C  | 1.71963900  | -6.14046100 | -0.54847700 | C           | -3.50709700 | -0.10014800 | -1.31178500 |
| H  | 0.00380700  | -6.42105700 | -1.82200600 | C           | -3.94141900 | -0.11973900 | -0.05745300 |
| H  | 3.41193300  | -5.49470100 | 0.61936800  | C           | -2.54312800 | 0.31716900  | -0.23505000 |
| C  | 1.87896000  | -7.60577600 | -0.21449600 | O           | -1.52434400 | -0.41626900 | 0.24155100  |
| H  | 2.60258600  | -8.09448600 | -0.88177700 | C           | -3.80321400 | -0.37142200 | -2.70838400 |
| H  | 2.24139500  | -7.74756200 | 0.81026400  | C           | -3.12408000 | 0.29247600  | -3.74686900 |
| H  | 0.93103000  | -8.14623200 | -0.31472700 | C           | -4.79005700 | -1.31883400 | -3.04777600 |
| C  | 3.95482100  | 0.40749200  | 0.10532200  | C           | -3.42944100 | 0.01996800  | -5.07965000 |
| C  | 3.06093400  | -0.07932500 | 1.00057800  | H           | -2.36416100 | 1.02889200  | -3.51024200 |
| C  | 2.56745100  | 0.46649900  | -0.22793000 | C           | -5.08660500 | -1.59262400 | -4.38031100 |
| O  | 1.74149900  | 1.30949300  | -0.71743200 | H           | -5.30532800 | -1.85260200 | -2.25422100 |
| C  | 5.31325600  | 0.68381700  | -0.29586600 | C           | -4.40876600 | -0.92169700 | -5.40262400 |
| C  | 5.53803000  | 1.36739300  | -1.50616200 | H           | -2.89654100 | 0.54521100  | -5.86769300 |
| C  | 6.41712300  | 0.28895400  | 0.48346400  | H           | -5.84618900 | -2.33138400 | -4.62323100 |
| C  | 6.83598200  | 1.65639500  | -1.91903800 | H           | -4.64149400 | -1.13379700 | -6.44280100 |
| H  | 4.68406600  | 1.65830100  | -2.11047600 | C           | -4.97667500 | -0.35056100 | 0.92639700  |
| C  | 7.71262200  | 0.57828900  | 0.06438500  | C           | -4.68964500 | -0.15054600 | 2.29075800  |

|   |             |             |             |            |             |             |             |
|---|-------------|-------------|-------------|------------|-------------|-------------|-------------|
| C | -6.27194200 | -0.76545300 | 0.56074700  | <b>TS7</b> |             |             |             |
| C | -5.66668300 | -0.37215300 | 3.25984700  | C          | -3.62989300 | -4.18685100 | -1.59015100 |
| H | -3.69582600 | 0.18530200  | 2.57249000  | C          | -2.59457300 | -3.28000100 | -1.53080700 |
| C | -7.24597300 | -0.98154500 | 1.53239600  | C          | -1.33832200 | -3.66825000 | -0.99570800 |
| H | -6.50890400 | -0.90364000 | -0.49005300 | C          | -1.17258500 | -5.01694400 | -0.52233900 |
| C | -6.94686300 | -0.79000400 | 2.88497200  | C          | -2.26419200 | -5.91915700 | -0.59790300 |
| H | -5.43162900 | -0.21186700 | 4.30891000  | C          | -3.47038500 | -5.51350900 | -1.12216800 |
| H | -8.24240000 | -1.29886200 | 1.23569800  | H          | -4.58766900 | -3.87629300 | -1.99767000 |
| H | -7.70875600 | -0.96039300 | 3.64103200  | H          | -2.71157700 | -2.25848900 | -1.86721800 |
| H | -1.00063100 | 0.39727100  | -1.98702800 | C          | 0.08713300  | -5.40122600 | 0.00021500  |
| C | 0.82691600  | 0.84287100  | -2.82674600 | H          | -2.12699000 | -6.93479500 | -0.23560700 |
| F | 1.25288300  | -0.36483500 | -3.28662700 | H          | -4.30312200 | -6.20884500 | -1.17672900 |
| F | 1.95197600  | 1.60118300  | -2.65542100 | C          | 1.11573700  | -4.49206700 | 0.02765400  |
| F | 0.16471400  | 1.42142200  | -3.86875700 | C          | 0.86778600  | -3.19131900 | -0.46217700 |
| C | -2.75375200 | -3.64653900 | 2.49919200  | H          | 0.22776800  | -6.41532000 | 0.36483400  |
| C | -1.83256500 | -2.87071600 | 1.83149300  | H          | 2.10120100  | -4.74037600 | 0.40392800  |
| C | -0.53118200 | -3.37672200 | 1.57676700  | N          | -0.30442400 | -2.76674800 | -0.94370700 |
| C | -0.19318000 | -4.69984000 | 2.03120100  | C          | 3.99752100  | -1.35246200 | -0.46754700 |
| C | -1.17287900 | -5.47016300 | 2.70939400  | C          | 2.96084600  | -0.22327500 | -0.84428200 |
| C | -2.42787800 | -4.95394600 | 2.93907400  | C          | 1.91935500  | -2.18230900 | -0.51458200 |
| H | -3.74543100 | -3.24664900 | 2.69122900  | N          | 1.72037200  | -1.01352100 | -1.02929700 |
| H | -2.05314600 | -1.87287500 | 1.46863900  | O          | 3.13750300  | -2.45917000 | -0.03454700 |
| C | 1.11730500  | -5.17922300 | 1.79518800  | H          | 4.47148700  | -1.69751200 | -1.39373600 |
| H | -0.91031900 | -6.46993500 | 3.04613700  | H          | 3.25362500  | 0.19435000  | -1.80448600 |
| H | -3.17291100 | -5.54789200 | 3.46125000  | C          | 2.79883500  | 0.91295900  | 0.14652300  |
| C | 2.02877400  | -4.37491900 | 1.15553600  | C          | 2.00006700  | 0.80133700  | 1.29079700  |
| C | 1.60815700  | -3.09074200 | 0.74302800  | C          | 3.50292800  | 2.10298700  | -0.07903800 |
| H | 1.39048400  | -6.17707600 | 2.12870100  | C          | 1.91913800  | 1.85837400  | 2.19900400  |
| H | 3.04604700  | -4.69250000 | 0.95843100  | H          | 1.41730500  | -0.09670200 | 1.47124300  |
| N | 0.38526800  | -2.59167000 | 0.92631800  | C          | 3.42482600  | 3.15793900  | 0.82975000  |
| C | 4.42192700  | -1.41614900 | -0.82431600 | H          | 4.11066000  | 2.20600600  | -0.97470500 |
| C | 3.32615000  | -0.28833400 | -0.81927500 | C          | 2.63281600  | 3.03645600  | 1.97314000  |
| C | 2.51956900  | -2.16602900 | 0.07721100  | H          | 1.28691500  | 1.75467300  | 3.07544200  |
| N | 2.11459300  | -1.05482000 | -0.44208500 | H          | 3.97427500  | 4.07606700  | 0.63962300  |
| O | 3.83271500  | -2.44021500 | 0.04212300  | H          | 2.56342300  | 3.86036200  | 2.67826600  |
| H | 4.44504700  | -1.85624600 | -1.82840100 | C          | 5.05680200  | -1.06358000 | 0.55971500  |
| H | 3.21826300  | 0.08251500  | -1.83395900 | C          | 6.32834100  | -0.67031200 | 0.12570300  |
| C | 3.56224200  | 0.89062900  | 0.10996100  | C          | 4.80278000  | -1.16323600 | 1.93326000  |
| C | 3.17432900  | 0.87314700  | 1.45551200  | C          | 7.32899900  | -0.36294700 | 1.04831700  |
| C | 4.20113300  | 2.03102800  | -0.39442900 | H          | 6.53879100  | -0.60698400 | -0.93987700 |
| C | 3.43064500  | 1.96913800  | 2.28161000  | C          | 5.80730400  | -0.86882400 | 2.85457300  |
| H | 2.64559400  | 0.01507900  | 1.85909900  | H          | 3.82452200  | -1.47925800 | 2.27931800  |
| C | 4.46337900  | 3.12424000  | 0.43084600  | C          | 7.07011300  | -0.46362300 | 2.41601400  |
| H | 4.48683000  | 2.06632100  | -1.44228500 | H          | 8.31091000  | -0.05701900 | 0.69798800  |
| C | 4.07899400  | 3.09587400  | 1.77341200  | H          | 5.60121200  | -0.95363300 | 3.91795500  |
| H | 3.11311300  | 1.94437700  | 3.32038900  | H          | 7.84957800  | -0.23291900 | 3.13703000  |
| H | 4.95809000  | 4.00125100  | 0.02238900  | Ni         | -0.08925200 | -0.67463100 | -1.57596600 |
| H | 4.27481200  | 3.94982400  | 2.41616200  | C          | 0.10753300  | 0.86240000  | -2.78252000 |
| C | 5.82080900  | -1.07779300 | -0.38987000 | C          | -0.08372000 | 2.11294300  | -2.02832900 |
| C | 6.77191200  | -0.75889200 | -1.36656900 | H          | 0.74829200  | 2.81033500  | -2.03861200 |
| C | 6.19185900  | -1.05146900 | 0.96010400  | C          | -1.12612100 | 2.52499300  | -1.26900500 |
| C | 8.07053800  | -0.40141400 | -1.00191200 | O          | -2.23103500 | 1.76284400  | -0.89438200 |
| H | 6.49658000  | -0.79297200 | -2.41857000 | C          | -1.21785200 | 3.87232700  | -0.66757600 |
| C | 7.49340300  | -0.70709600 | 1.32334500  | C          | -0.57452400 | 4.97844500  | -1.25122600 |
| H | 5.46491800  | -1.30962600 | 1.72284100  | C          | -1.96176600 | 4.09143500  | 0.50476900  |
| C | 8.43437800  | -0.37654500 | 0.34526500  | C          | -0.64343800 | 6.23874800  | -0.66536600 |
| H | 8.79813700  | -0.15449200 | -1.77007000 | H          | -0.03210800 | 4.85486700  | -2.18381000 |
| H | 7.77242600  | -0.69512100 | 2.37338500  | C          | -2.03176800 | 5.35817100  | 1.07968600  |
| H | 9.44713200  | -0.10672200 | 0.63179900  | H          | -2.48019300 | 3.25858900  | 0.96650500  |
|   |             |             |             | C          | -1.37486300 | 6.45662900  | 0.51061600  |



|    |             |             |             |             |             |             |             |
|----|-------------|-------------|-------------|-------------|-------------|-------------|-------------|
| H  | 7.29822600  | 0.15177700  | -0.13714800 | F           | 2.78166300  | -1.46029700 | 2.01431300  |
| H  | 7.50769800  | -2.25041700 | -0.71298000 |             |             |             |             |
| C  | 3.76063700  | 2.15951300  | -0.23435100 | <b>CP13</b> |             |             |             |
| C  | 2.65409100  | 1.32273500  | -0.47323400 | C           | 5.83592000  | -0.33592000 | -1.53134900 |
| H  | 5.88198800  | 2.18286300  | 0.09137100  | C           | 4.53628800  | -0.16547700 | -1.11079900 |
| H  | 3.60441800  | 3.22760200  | -0.13583200 | C           | 3.83692400  | -1.24010900 | -0.50653800 |
| N  | 2.72393300  | -0.01667100 | -0.58376000 | C           | 4.49704000  | -2.50700600 | -0.35294900 |
| C  | -0.32816000 | 3.26072600  | -1.21022700 | C           | 5.84257400  | -2.63952600 | -0.78346400 |
| C  | -0.89886000 | 1.79135800  | -1.05006900 | C           | 6.49885600  | -1.57634400 | -1.36082800 |
| C  | 1.30474300  | 1.83499700  | -0.68502200 | H           | 6.36218100  | 0.49292900  | -1.99546300 |
| N  | 0.35035200  | 1.01472700  | -0.95463000 | H           | 4.01898300  | 0.77725700  | -1.22518200 |
| O  | 1.03113400  | 3.14729500  | -0.65279700 | C           | 3.76911100  | -3.58340800 | 0.21086000  |
| H  | -0.18611800 | 3.45237100  | -2.28032700 | H           | 6.33968000  | -3.59772900 | -0.65612500 |
| H  | -1.41300300 | 1.51475700  | -1.97411000 | H           | 7.52775800  | -1.68596600 | -1.69128900 |
| C  | -1.84895400 | 1.56464200  | 0.11342900  | C           | 2.45201700  | -3.40339400 | 0.56197100  |
| C  | -1.40557000 | 1.17423100  | 1.38096400  | C           | 1.87717400  | -2.13043800 | 0.37189300  |
| C  | -3.21666600 | 1.78823000  | -0.08886000 | H           | 4.25572600  | -4.54568500 | 0.34546400  |
| C  | -2.31526200 | 1.01506000  | 2.42768200  | H           | 1.84713100  | -4.20295000 | 0.97444300  |
| H  | -0.35868000 | 0.94937000  | 1.55048700  | N           | 2.53675900  | -1.06293000 | -0.10762000 |
| C  | -4.12508000 | 1.63692500  | 0.95775400  | C           | -1.61833800 | -2.10010400 | 1.38960400  |
| H  | -3.57483700 | 2.07998600  | -1.07375500 | C           | -1.46634800 | -0.73901100 | 0.60027600  |
| C  | -3.67528900 | 1.24975200  | 2.22165600  | C           | 0.46959100  | -1.84808900 | 0.63882700  |
| H  | -1.95697700 | 0.68976500  | 3.40034500  | N           | -0.00481100 | -0.66948600 | 0.42175300  |
| H  | -5.18358900 | 1.80952700  | 0.78273800  | O           | -0.37284900 | -2.80631500 | 1.06359300  |
| H  | -4.38230500 | 1.11870400  | 3.03636500  | H           | -1.55679100 | -1.87514500 | 2.46116600  |
| C  | -1.06255600 | 4.41409900  | -0.58795700 | H           | -1.79146400 | 0.08247800  | 1.24313100  |
| C  | -1.87036800 | 5.21948200  | -1.39943700 | C           | -2.20635800 | -0.63718700 | -0.72347000 |
| C  | -0.97226600 | 4.69637400  | 0.78127600  | C           | -1.66563800 | -1.13217400 | -1.91663600 |
| C  | -2.59278600 | 6.28094200  | -0.85217700 | C           | -3.47813900 | -0.05194600 | -0.74817100 |
| H  | -1.93317300 | 5.01793400  | -2.46680800 | C           | -2.38898900 | -1.05369600 | -3.10775600 |
| C  | -1.68387800 | 5.76436000  | 1.32539100  | H           | -0.66723100 | -1.55883300 | -1.92486700 |
| H  | -0.34233500 | 4.08349300  | 1.41697800  | C           | -4.20358600 | 0.02291900  | -1.93667600 |
| C  | -2.49905200 | 6.55618900  | 0.51251800  | H           | -3.89627600 | 0.36450700  | 0.16438000  |
| H  | -3.21741000 | 6.89663100  | -1.49346200 | C           | -3.66151700 | -0.48062000 | -3.12046300 |
| H  | -1.60399400 | 5.97680600  | 2.38789100  | H           | -1.95208700 | -1.43298900 | -4.02759400 |
| H  | -3.05409800 | 7.38629300  | 0.94087300  | H           | -5.18592800 | 0.48702400  | -1.93920300 |
| Ni | 0.91523200  | -0.86318400 | -0.55281500 | H           | -4.22169300 | -0.41534400 | -4.04931600 |
| C  | 1.24635000  | -2.49086700 | 0.49293600  | C           | -2.81670800 | -2.96801900 | 1.12536900  |
| C  | -0.02629600 | -3.28415000 | 0.41542400  | C           | -3.93741100 | -2.84166800 | 1.95519300  |
| H  | -0.11047000 | -4.26684200 | 0.86956900  | C           | -2.85245600 | -3.87945500 | 0.06308200  |
| C  | -1.03193900 | -2.66744200 | -0.24272500 | C           | -5.08477500 | -3.59949200 | 1.71826200  |
| O  | -0.77615300 | -1.46360400 | -0.78504200 | H           | -3.91175600 | -2.14859100 | 2.79351000  |
| C  | -2.40360300 | -3.18658200 | -0.45335200 | C           | -3.99471900 | -4.64603400 | -0.16563700 |
| C  | -2.88679900 | -4.32473300 | 0.21688500  | H           | -1.98318400 | -3.99357800 | -0.57554600 |
| C  | -3.26825800 | -2.53866700 | -1.34748700 | C           | -5.11479400 | -4.50536900 | 0.65688800  |
| C  | -4.17401300 | -4.79836300 | -0.01267000 | H           | -5.94784700 | -3.49031000 | 2.36917200  |
| H  | -2.25352000 | -4.83494300 | 0.93650900  | H           | -4.01008500 | -5.35412200 | -0.98963400 |
| C  | -4.55911200 | -3.01727800 | -1.57162900 | H           | -6.00362600 | -5.10327500 | 0.47504700  |
| H  | -2.91229700 | -1.65296200 | -1.86166500 | Ni          | 1.43722500  | 0.62325500  | 0.08875200  |
| C  | -5.03693700 | -4.15657100 | -0.91510900 | C           | 2.36368500  | 2.31382200  | 0.13760900  |
| H  | -4.52136100 | -5.67947200 | 0.52398100  | H           | 2.70773900  | 2.69585800  | -0.82415300 |
| H  | -5.20861200 | -2.49476200 | -2.27174200 | C           | 0.96032300  | 2.47732600  | 0.43462100  |
| C  | -6.42737800 | -4.69013100 | -1.17189200 | H           | 0.66842200  | 2.61905600  | 1.47198300  |
| H  | -6.94760200 | -4.92769300 | -0.23582700 | C           | 3.34513000  | 2.53866800  | 1.23300800  |
| H  | -7.03854800 | -3.96548100 | -1.72046500 | F           | 2.95034600  | 1.98613500  | 2.41466900  |
| H  | -6.40114700 | -5.61392900 | -1.76592500 | F           | 4.56855400  | 2.01097100  | 0.94924700  |
| C  | 1.56359600  | -2.07245900 | 1.90728500  | F           | 3.56870400  | 3.85676600  | 1.49599100  |
| H  | 2.11176900  | -3.08695500 | 0.17813400  | C           | 0.04153300  | 2.95782400  | -0.61041600 |
| F  | 0.65964200  | -1.20041000 | 2.43416700  | O           | 0.40273700  | 3.12866300  | -1.77834700 |
| F  | 1.61080000  | -3.12373600 | 2.77326800  | C           | -1.39992100 | 3.23791900  | -0.24602100 |

|            |             |             |             |             |             |             |             |
|------------|-------------|-------------|-------------|-------------|-------------|-------------|-------------|
| C          | -1.93418200 | 3.08821400  | 1.04224900  | Ni          | -1.37955200 | 0.30743200  | -0.39104800 |
| C          | -2.25144100 | 3.69488000  | -1.26356500 | C           | -2.42191200 | 1.81550100  | 0.18130800  |
| C          | -3.27381800 | 3.38547000  | 1.29997300  | C           | -1.19555400 | 2.38001200  | 0.78132600  |
| H          | -1.31049100 | 2.74113900  | 1.85988100  | H           | -1.18388700 | 2.76487400  | 1.79616700  |
| C          | -3.58463600 | 3.99222800  | -1.00340100 | C           | -0.10050600 | 2.45643600  | -0.08370100 |
| H          | -1.83391200 | 3.80741700  | -2.25863200 | O           | -0.12838900 | 1.69578600  | -1.14448200 |
| C          | -4.12178100 | 3.84744600  | 0.28526800  | C           | 1.05627900  | 3.35950100  | 0.10627900  |
| H          | -3.66358000 | 3.26714200  | 2.30920800  | C           | 1.06504700  | 4.37542500  | 1.07839000  |
| H          | -4.22344700 | 4.34516400  | -1.81073400 | C           | 2.17696900  | 3.23038100  | -0.72785400 |
| C          | -5.56059000 | 4.20844300  | 0.57218300  | C           | 2.16403200  | 5.21585300  | 1.21903200  |
| H          | -5.92247200 | 3.72601500  | 1.48640300  | H           | 0.19427800  | 4.52328400  | 1.70969400  |
| H          | -5.67839100 | 5.29220800  | 0.70657600  | C           | 3.26917200  | 4.08342600  | -0.59049800 |
| H          | -6.22094700 | 3.91443100  | -0.25170700 | H           | 2.17063400  | 2.45301800  | -1.48315800 |
|            |             |             |             | C           | 3.28810900  | 5.08560700  | 0.38816200  |
|            |             |             |             | H           | 2.14633800  | 5.99847800  | 1.97482300  |
|            |             |             |             | H           | 4.12503300  | 3.96995400  | -1.25283200 |
|            |             |             |             | C           | 4.48474400  | 5.99172800  | 0.55801200  |
|            |             |             |             | H           |             | 5.11585000  | 5.66730400  |
| <b>TS9</b> |             |             |             | 1.39689600  |             |             |             |
| C          | -6.09450500 | -0.43737400 | 0.30301800  | H           | 5.11263300  | 5.99911500  | -0.33917400 |
| C          | -4.76167700 | -0.36435800 | -0.04884300 | H           | 4.18079200  | 7.02403500  | 0.76653400  |
| C          | -3.85959100 | -1.39321900 | 0.31504000  | C           | -3.06661300 | 2.61302200  | -0.94505100 |
| C          | -4.38912000 | -2.56103100 | 0.96711400  | H           | -3.19706100 | 1.59046800  | 0.91595200  |
| C          | -5.75782500 | -2.59175800 | 1.33469900  | F           | -4.20842600 | 3.22686000  | -0.51100100 |
| C          | -6.59566600 | -1.54270900 | 1.02490600  | F           | -2.29418000 | 3.57516300  | -1.47540200 |
| H          | -6.76597500 | 0.36279100  | 0.00558000  | F           | -3.46854400 | 1.82591200  | -1.99302200 |
| H          | -4.40010800 | 0.44994000  | -0.65530300 |             |             |             |             |
| C          | -3.53578400 | -3.67392600 | 1.17851400  |             |             |             |             |
| H          | -6.13590900 | -3.47204500 | 1.84836700  |             |             |             |             |
| H          | -7.64448800 | -1.57845500 | 1.30513800  |             |             |             |             |
| C          | -2.23886500 | -3.61530800 | 0.73349800  |             |             |             |             |
| C          | -1.76970400 | -2.41271300 | 0.17135100  | <b>CP14</b> |             |             |             |
| H          | -3.92691000 | -4.56659900 | 1.65850400  | Ni          | 1.15592100  | 0.44323900  | -0.22192400 |
| H          | -1.55627600 | -4.45313000 | 0.82163200  | C           | 2.46683000  | 1.85599800  | 0.14434000  |
| N          | -2.51595500 | -1.29306600 | 0.00039200  | C           | 1.68274500  | 3.13897500  | 0.14014600  |
| C          | 1.57256100  | -2.78820700 | -1.17651700 | H           | 2.16765600  | 4.10248400  | 0.26647900  |
| C          | 1.45651200  | -1.22201300 | -0.96158300 | C           | 0.35082500  | 2.98242000  | -0.01013400 |
| C          | -0.39973700 | -2.26074700 | -0.27690100 | O           | -0.11653100 | 1.73291900  | -0.19135300 |
| N          | 0.04398600  | -1.09204300 | -0.58239100 | C           | -0.67475500 | 4.05096800  | -0.01457900 |
| O          | 0.43095700  | -3.31096000 | -0.41408200 | C           | -0.41180900 | 5.34286200  | 0.47480800  |
| H          | 1.34291400  | -2.99711600 | -2.22804600 | C           | -1.95894000 | 3.78784200  | -0.51430800 |
| H          | 1.61595600  | -0.72112300 | -1.91982700 | C           | -1.38998000 | 6.33112900  | 0.44748000  |
| C          | 2.40410800  | -0.61974300 | 0.06280700  | H           | 0.56316400  | 5.56759300  | 0.89721200  |
| C          | 2.05365900  | -0.47746600 | 1.40978100  | C           | -2.93605900 | 4.78344500  | -0.53653800 |
| C          | 3.68577300  | -0.23017900 | -0.34766700 | H           | -2.17793100 | 2.79385900  | -0.88978900 |
| C          | 2.96977400  | 0.03919100  | 2.32842900  | C           | -2.67269000 | 6.07298100  | -0.06170700 |
| H          | 1.05527100  | -0.74786200 | 1.73895700  | H           | -1.15897800 | 7.32090000  | 0.83739800  |
| C          | 4.60374800  | 0.27915400  | 0.56939000  | H           | -3.92323000 | 4.55397700  | -0.93387000 |
| H          | 3.96765900  | -0.32886100 | -1.39355600 | C           | -3.72478100 | 7.15739800  | -0.09815500 |
| C          | 4.24741400  | 0.41504300  | 1.91272400  | H           | -3.83426400 | 7.64689500  | 0.87773500  |
| H          | 2.67945400  | 0.15375100  | 3.36941900  | H           | -4.70309700 | 6.75525300  | -0.38204300 |
| H          | 5.59304700  | 0.57799700  | 0.23357700  | H           | -3.46891000 | 7.94296200  | -0.82191000 |
| H          | 4.95794300  | 0.82029200  | 2.62801300  | C           | 3.07803900  | 1.58731600  | 1.49696300  |
| C          | 2.83971000  | -3.49820500 | -0.79043700 | H           | 3.31109200  | 1.89483300  | -0.55594200 |
| C          | 3.77469800  | -3.80674500 | -1.78573800 | F           | 2.15399800  | 1.32457800  | 2.46062400  |
| C          | 3.11678300  | -3.84684700 | 0.53764400  | F           | 3.81801100  | 2.63195000  | 1.96494100  |
| C          | 4.97659000  | -4.43746000 | -1.46071900 | F           | 3.92961700  | 0.51678300  | 1.48869000  |
| H          | 3.55981300  | -3.55650800 | -2.82257600 | C           | 5.46019500  | -0.59111900 | -2.07930700 |
| C          | 4.31201800  | -4.48748500 | 0.86076300  | C           | 4.17759500  | -0.41038400 | -1.61174400 |
| H          | 2.39258800  | -3.62356500 | 1.31383100  | C           | 3.57911000  | -1.38246600 | -0.77063800 |
| C          | 5.24696900  | -4.78037700 | -0.13535900 | C           | 4.31173900  | -2.57962500 | -0.46432600 |
| H          | 5.69317700  | -4.67031600 | -2.24356100 | C           | 5.64196700  | -2.71681900 | -0.93955000 |
| H          | 4.51455000  | -4.75769700 | 1.89353600  | C           | 6.20890400  | -1.73974900 | -1.72516700 |
| H          | 6.17805900  | -5.27883000 | 0.12016700  | H           | 5.90187500  | 0.15551500  | -2.73271700 |

|             |             |             |             |    |             |             |             |
|-------------|-------------|-------------|-------------|----|-------------|-------------|-------------|
| H           | 3.59203600  | 0.45289400  | -1.89702300 | O  | 2.69555900  | -2.61083600 | -0.77834800 |
| C           | 3.66522800  | -3.59864600 | 0.27606500  | H  | 3.37146700  | -1.35906900 | -2.25201300 |
| H           | 6.19512800  | -3.61718900 | -0.68560800 | H  | 2.83285400  | 0.57439900  | -1.15536700 |
| H           | 7.22461300  | -1.85506700 | -2.09186700 | C  | 3.43942300  | 0.18815600  | 0.85660400  |
| C           | 2.34393900  | -3.44915700 | 0.62683200  | C  | 3.70927700  | -0.70520000 | 1.90219800  |
| C           | 1.69944700  | -2.24240600 | 0.29749000  | C  | 3.75815800  | 1.54075500  | 1.02775700  |
| H           | 4.21121500  | -4.50285300 | 0.53082400  | C  | 4.28640900  | -0.25655700 | 3.08810200  |
| H           | 1.78921900  | -4.22067800 | 1.14859300  | H  | 3.45977100  | -1.75632700 | 1.79664200  |
| N           | 2.30053700  | -1.20133600 | -0.30859400 | C  | 4.33199400  | 1.99418900  | 2.21770100  |
| C           | -1.78138900 | -2.15516800 | 1.39930900  | H  | 3.55221200  | 2.24680000  | 0.22760000  |
| C           | -1.67371100 | -0.91084900 | 0.41613400  | C  | 4.59998200  | 1.09540700  | 3.24989700  |
| C           | 0.27895700  | -2.00150400 | 0.53715700  | H  | 4.48750600  | -0.96235800 | 3.88949600  |
| N           | -0.24389700 | -0.91542500 | 0.09167600  | H  | 4.56763900  | 3.04864500  | 2.33376200  |
| O           | -0.50893300 | -2.87201900 | 1.18304400  | H  | 5.04785300  | 1.44410200  | 4.17672300  |
| H           | -1.72846400 | -1.78101700 | 2.42691600  | C  | 4.99590100  | -1.75637600 | -0.92007300 |
| H           | -1.88917700 | 0.00476400  | 0.97139600  | C  | 5.94133400  | -0.85817900 | -1.43426700 |
| C           | -2.54840600 | -0.93395800 | -0.82458300 | C  | 5.43690600  | -2.88290700 | -0.21916900 |
| C           | -2.12965200 | -1.53344000 | -2.01787300 | C  | 7.30359000  | -1.07436300 | -1.23472000 |
| C           | -3.81807300 | -0.34531100 | -0.77214400 | H  | 5.61008600  | 0.01377100  | -1.99377000 |
| C           | -2.96756700 | -1.55059900 | -3.13420100 | C  | 6.80270500  | -3.10155000 | -0.02525800 |
| H           | -1.13623000 | -1.96729100 | -2.08413600 | H  | 4.71180300  | -3.59136500 | 0.16644400  |
| C           | -4.65920200 | -0.36681300 | -1.88450300 | C  | 7.73912300  | -2.19836400 | -0.52828000 |
| H           | -4.14773600 | 0.13975500  | 0.14361500  | H  | 8.02511200  | -0.76359800 | -1.63536200 |
| C           | -4.23568800 | -0.97099100 | -3.06994100 | H  | 7.13268200  | -3.98206800 | 0.51959700  |
| H           | -2.62506200 | -2.01161800 | -4.05685000 | H  | 8.80122300  | -2.36990900 | -0.37627400 |
| H           | -5.64009500 | 0.09729300  | -1.82796000 | Ni | -0.53065100 | -0.11289200 | -0.23472200 |
| H           | -4.88608400 | -0.98137700 | -3.94035600 | C  | -0.88723200 | 0.25955600  | -2.23053400 |
| C           | -2.94724300 | -3.09483100 | 1.26489400  | H  | -0.11231400 | -0.20292300 | -2.83688800 |
| C           | -4.04544000 | -2.93593000 | 2.11840700  | C  | -0.56067600 | 1.46152800  | -1.57756100 |
| C           | -2.97448700 | -4.10835600 | 0.29885300  | H  | -1.34518500 | 2.13027800  | -1.24154600 |
| C           | -5.16241600 | -3.76403400 | 1.99968000  | C  | -2.25263300 | 0.00957900  | -2.76772300 |
| H           | -4.02587500 | -2.16257400 | 2.88329500  | F  | -3.24923600 | 0.46958400  | -1.96390600 |
| C           | -4.08504800 | -4.94400200 | 0.18864200  | F  | -2.43334000 | 0.61478700  | -3.97145700 |
| H           | -2.12209600 | -4.24909400 | -0.35751800 | F  | -2.48741300 | -1.31108300 | -2.97755700 |
| C           | -5.18357800 | -4.77150000 | 1.03427800  | C  | 0.78002900  | 2.06109700  | -1.83919600 |
| H           | -6.00810900 | -3.62861000 | 2.66815000  | O  | 1.58700400  | 1.48785900  | -2.58008800 |
| H           | -4.09319900 | -5.73079100 | -0.56069900 | C  | 1.14097300  | 3.38573200  | -1.24810100 |
| H           | -6.04829700 | -5.42325300 | 0.94468300  | C  | 0.40808700  | 4.00208900  | -0.22309700 |
|             |             |             |             | C  | 2.28584000  | 4.03583500  | -1.74536500 |
|             |             |             |             | C  | 0.82159000  | 5.23195100  | 0.29035700  |
|             |             |             |             | H  | -0.47622000 | 3.52714300  | 0.18839200  |
|             |             |             |             | C  | 2.68369400  | 5.26394000  | -1.23255200 |
|             |             |             |             | H  | 2.84700400  | 3.55632000  | -2.54091800 |
|             |             |             |             | C  | 1.95638700  | 5.88641800  | -0.20345600 |
|             |             |             |             | H  | 0.24691400  | 5.69056100  | 1.09175200  |
|             |             |             |             | H  | 3.56879300  | 5.75374800  | -1.63339900 |
|             |             |             |             | C  | 2.37724300  | 7.23395600  | 0.33253600  |
|             |             |             |             | H  |             | 3.46663700  | 7.30511600  |
|             |             |             |             |    | 0.42987800  |             |             |
|             |             |             |             | H  | 2.06104900  | 8.04251700  | -0.34030100 |
|             |             |             |             | H  | 1.93342900  | 7.43214500  | 1.31345000  |
|             |             |             |             | C  | -0.66629200 | 0.47934800  | 1.69469500  |
|             |             |             |             | H  | -0.20410500 | 1.45566700  | 1.81999400  |
|             |             |             |             | C  | -1.97245400 | 0.39774600  | 1.15513400  |
|             |             |             |             | H  | -2.50621100 | -0.52184600 | 1.36369700  |
|             |             |             |             | C  | -0.28664900 | -0.48538100 | 2.77041200  |
|             |             |             |             | F  | -0.75272500 | -1.74539800 | 2.54792600  |
|             |             |             |             | F  | 1.04725000  | -0.58526700 | 2.94361000  |
|             |             |             |             | F  | -0.79637700 | -0.10929000 | 3.97699300  |
|             |             |             |             | C  | -2.82124200 | 1.58045100  | 0.88649200  |
| <b>CP15</b> |             |             |             |    |             |             |             |
| C           | -4.40281500 | -3.18663100 | -0.19009000 |    |             |             |             |
| C           | -3.25620100 | -2.43104900 | -0.29100100 |    |             |             |             |
| C           | -1.97966200 | -3.04990300 | -0.24973100 |    |             |             |             |
| C           | -1.91631600 | -4.48119900 | -0.15059500 |    |             |             |             |
| C           | -3.11800000 | -5.22829200 | -0.04113100 |    |             |             |             |
| C           | -4.33884300 | -4.59429700 | -0.05107500 |    |             |             |             |
| H           | -5.36880000 | -2.69147400 | -0.22682700 |    |             |             |             |
| H           | -3.31557500 | -1.36309400 | -0.43957700 |    |             |             |             |
| C           | -0.64449000 | -5.10152900 | -0.19230500 |    |             |             |             |
| H           | -3.05260900 | -6.31015000 | 0.04179100  |    |             |             |             |
| H           | -5.25539800 | -5.17140300 | 0.03055300  |    |             |             |             |
| C           | 0.48013000  | -4.32801100 | -0.32940300 |    |             |             |             |
| C           | 0.32948200  | -2.92235400 | -0.37313800 |    |             |             |             |
| H           | -0.57443500 | -6.18431400 | -0.12962400 |    |             |             |             |
| H           | 1.47324600  | -4.75640300 | -0.39166700 |    |             |             |             |
| N           | -0.84201200 | -2.28697500 | -0.32259600 |    |             |             |             |
| C           | 3.53730300  | -1.48016700 | -1.17324300 |    |             |             |             |
| C           | 2.84722800  | -0.26645700 | -0.46479500 |    |             |             |             |
| C           | 1.50221500  | -2.05182600 | -0.48110500 |    |             |             |             |
| N           | 1.44626200  | -0.77643500 | -0.33629700 |    |             |             |             |



|             |             |             |             |             |             |             |             |
|-------------|-------------|-------------|-------------|-------------|-------------|-------------|-------------|
| O           | -2.35550300 | 2.71054300  | 0.71998000  | H           | -1.84503800 | 0.25950300  | 4.93149500  |
| C           | -4.31251300 | 1.40167900  | 0.83218900  | H           | -4.07864200 | 1.34267300  | 5.11252400  |
| C           | -4.99541300 | 0.32563800  | 1.41740900  | C           | -3.35649400 | -0.53386300 | -0.89857800 |
| C           | -5.06892200 | 2.40486400  | 0.20189700  | C           | -3.72391600 | -0.18949200 | -2.20770900 |
| C           | -6.38845400 | 0.25278100  | 1.36199300  | C           | -4.15062500 | -1.47771100 | -0.22039800 |
| H           | -4.45444000 | -0.45019900 | 1.94927800  | C           | -4.83964900 | -0.76881100 | -2.81889600 |
| C           | -6.45323500 | 2.31901000  | 0.13590500  | H           | -3.15487700 | 0.55139100  | -2.75778800 |
| H           | -4.54286600 | 3.24854400  | -0.23203000 | C           | -5.26660800 | -2.05284900 | -0.82751200 |
| C           | -7.14091400 | 1.23894400  | 0.71415200  | H           | -3.90201700 | -1.76111300 | 0.79782000  |
| H           | -6.89849300 | -0.58107700 | 1.83922900  | C           | -5.61553700 | -1.70344400 | -2.13415000 |
| H           | -7.01603700 | 3.10197100  | -0.36789300 | H           | -5.10412600 | -0.47749700 | -3.83242800 |
| C           | -8.64610100 | 1.15048100  | 0.63094500  | H           | -5.86422600 | -2.77498400 | -0.27677500 |
| H           | -9.03642800 | 0.34016600  | 1.25470600  | H           | -6.48450800 | -2.15085500 | -2.60922300 |
| H           | -9.11943600 | 2.08487300  | 0.95543000  | P           | 1.81317100  | 0.10815700  | 0.05373500  |
| H           | -8.97582400 | 0.96591500  | -0.39980300 | C           | 1.63357900  | 1.79699800  | 0.82494900  |
|             |             |             |             | C           | 1.90878600  | 2.99908200  | 0.15566400  |
|             |             |             |             | C           | 1.14290300  | 1.87567400  | 2.14027900  |
| <b>CP16</b> |             |             |             | C           | 1.72419900  | 4.23062700  | 0.78881900  |
| Ni          | 0.00001500  | -1.25034700 | 0.00007400  | H           | 2.25889400  | 2.98470400  | -0.86964800 |
| C           | 0.93136800  | -2.77638700 | -1.24056100 | C           | 0.97060400  | 3.10372900  | 2.77916600  |
| C           | -0.40242100 | -2.65421000 | -1.59598600 | H           | 0.88535600  | 0.96561500  | 2.67133900  |
| C           | -1.49872900 | -3.59809700 | -1.14367100 | C           | 1.26435100  | 4.28981500  | 2.10407700  |
| C           | -1.48169600 | -3.90569900 | 0.37787300  | H           | 1.94107200  | 5.14674200  | 0.24533900  |
| C           | -0.93068000 | -2.77660300 | 1.24076400  | H           | 0.59524700  | 3.13106400  | 3.79885800  |
| C           | 0.40306100  | -2.65381400 | 1.59620000  | H           | 1.12589700  | 5.24945300  | 2.59525500  |
| C           | 1.49965200  | -3.59747200 | 1.14407300  | C           | 2.56945600  | 0.52608400  | -1.60301500 |
| C           | 1.48307000  | -3.90503500 | -0.37751900 | C           | 3.83540500  | 1.12738400  | -1.72267400 |
| H           | 1.65919700  | -2.25620100 | -1.85617400 | C           | 1.86865800  | 0.22065400  | -2.77657400 |
| H           | -0.64519500 | -2.05347600 | -2.47244500 | C           | 4.37163200  | 1.42417000  | -2.97555400 |
| H           | -1.44312000 | -4.54544600 | -1.70655000 | H           | 4.40802500  | 1.36135300  | -0.83008800 |
| H           | -2.46143600 | -3.15138300 | -1.40468600 | C           | 2.40415800  | 0.51225700  | -4.03467200 |
| H           | -2.50631400 | -4.13119200 | 0.69877600  | H           | 0.90038700  | -0.26149700 | -2.69577300 |
| H           | -0.90636700 | -4.81926200 | 0.56854800  | C           | 3.65622900  | 1.11762000  | -4.13673100 |
| H           | -1.65880400 | -2.25664500 | 1.85621500  | H           | 5.35087200  | 1.89095100  | -3.04583300 |
| H           | 0.64561900  | -2.05282000 | 2.47254000  | H           | 1.84416900  | 0.25971600  | -4.93156800 |
| H           | 1.44406000  | -4.54485900 | 1.70687800  | H           | 4.07732000  | 1.34374100  | -5.11294800 |
| H           | 2.46222500  | -3.15061900 | 1.40534000  | C           | 3.35669700  | -0.53358000 | 0.89810300  |
| H           | 2.50791800  | -4.12969900 | -0.69825100 | C           | 3.72405000  | -0.18966100 | 2.20736900  |
| H           | 0.90851300  | -4.81906000 | -0.56832400 | C           | 4.15102700  | -1.47698800 | 0.21954400  |
| P           | -1.81320600 | 0.10793400  | -           | C           | 4.83990600  | -0.76899100 | 2.81832300  |
| 0.05382800  |             |             |             | H           | 3.15484400  | 0.55087700  | 2.75774100  |
| C           | -1.63370500 | 1.79698800  | -0.82461100 | C           | 5.26713500  | -2.05213200 | 0.82642200  |
| C           | -1.90900200 | 2.99884000  | -0.15493100 | H           | 3.90247300  | -1.76007600 | -0.79876500 |
| C           | -1.14302800 | 1.87614100  | -2.13990300 | C           | 5.61599200  | -1.70318300 | 2.13320100  |
| C           | -1.72451600 | 4.23060400  | -0.78768500 | H           | 5.10431900  | -0.47803300 | 3.83197300  |
| H           | -2.25910500 | 2.98413300  | 0.87037700  | H           | 5.86490600  | -2.77391600 | 0.27538900  |
| C           | -0.97084600 | 3.10442100  | -2.77839700 | H           | 6.48505100  | -2.15060900 | 2.60809900  |
| H           | -0.88533600 | 0.96630100  | -2.67126300 |             |             |             |             |
| C           | -1.26469400 | 4.29026300  | -2.10293600 | <b>CP17</b> |             |             |             |
| H           | -1.94145900 | 5.14651900  | -0.24389700 | C           | -0.00571700 | -2.57767700 | -0.68561300 |
| H           | -0.59549500 | 3.13210000  | -3.79808200 | H           | -0.29232900 | -3.26760000 | 0.10394600  |
| H           | -1.12634300 | 5.25006800  | -2.59381600 | C           | 1.31030300  | -2.01454600 | -0.63685700 |
| C           | -2.56993200 | 0.52550100  | 1.60282600  | H           | 1.82660000  | -1.80270900 | -1.56650000 |
| C           | -3.83610100 | 1.12637800  | 1.72228800  | C           | -0.55426300 | -2.96766700 | -2.01269000 |
| C           | -1.86919700 | 0.22038200  | 2.77650300  | F           | 0.03615200  | -4.07782700 | -2.53028600 |
| C           | -4.37263500 | 1.42298100  | 2.97507800  | F           | -1.88535700 | -3.25037400 | -1.95853200 |
| H           | -4.40865600 | 1.36017900  | 0.82961500  | F           | -0.40486600 | -1.99523100 | -2.96092400 |
| C           | -2.40499800 | 0.51180700  | 4.03451300  | C           | 2.11310400  | -2.23572900 | 0.57469000  |
| H           | -0.90072400 | -0.26137700 | 2.69587200  | O           | 1.58692800  | -2.59638300 | 1.63899000  |
| C           | -3.65731100 | 1.11670100  | 4.13637700  | C           | 3.60379200  | -2.03155100 | 0.53386100  |
| H           | -5.35205400 | 1.88941200  | 3.04518800  |             |             |             |             |

|            |             |             |             |             |             |             |             |
|------------|-------------|-------------|-------------|-------------|-------------|-------------|-------------|
| C          | 4.29520800  | -1.48998500 | -0.55966200 | H           | -2.39593600 | 6.00132900  | -1.13172600 |
| C          | 4.34589500  | -2.42073500 | 1.66178300  | C           | 2.08484000  | 1.40718200  | -1.60034600 |
| C          | 5.68151300  | -1.34091700 | -0.51971600 | C           | 3.30826100  | 2.08848500  | -1.52879100 |
| H          | 3.76283600  | -1.16265400 | -1.44575600 | C           | 1.75478500  | 0.73614700  | -2.79092600 |
| C          | 5.72792000  | -2.27965300 | 1.69192800  | C           | 4.17575600  | 2.10613200  | -2.62341100 |
| H          | 3.80669900  | -2.83706900 | 2.50632500  | H           | 3.59781600  | 2.59629600  | -0.61533400 |
| C          | 6.42347200  | -1.73800900 | 0.59909500  | C           | 2.61725700  | 0.76555700  | -3.88851400 |
| H          | 6.19400900  | -0.90701700 | -1.37530300 | H           | 0.82965300  | 0.17057500  | -2.85204900 |
| H          | 6.28132200  | -2.59292700 | 2.57501800  | C           | 3.83197900  | 1.45036100  | -3.80668200 |
| C          | 7.92840600  | -1.61159700 | 0.62447400  | H           | 5.12317900  | 2.63352400  | -2.54764800 |
| H          | 8.28374300  | -0.89214700 | -0.12056300 | H           | 2.34339100  | 0.24267100  | -4.80097500 |
| H          | 8.28777300  | -1.28824800 | 1.60811400  | H           | 4.50863600  | 1.46635800  | -4.65698300 |
| H          | 8.41044200  | -2.57422100 | 0.40640900  | C           | 1.82101400  | 1.82735700  | 1.29457100  |
| Ni         | -0.15028300 | -0.69629100 | -0.19474200 | C           | 2.25798800  | 3.14626100  | 1.51459200  |
| P          |             | -2.31264100 | -0.48019100 | C           | 2.12510400  | 0.84811500  | 2.25285000  |
| 0.32539200 |             |             |             | C           | 2.99072600  | 3.47132500  | 2.65608200  |
| C          | -3.29954300 | 0.33682800  | -1.00604800 | H           | 2.01420700  | 3.92543400  | 0.79872500  |
| C          | -3.74229800 | 1.66431600  | -0.90576200 | C           | 2.85920100  | 1.17655000  | 3.39578300  |
| C          | -3.50783600 | -0.35280000 | -2.21560800 | H           | 1.78856200  | -0.17404700 | 2.11479500  |
| C          | -4.39729200 | 2.27898600  | -1.97547300 | C           | 3.29455000  | 2.48578300  | 3.59913900  |
| H          | -3.56898600 | 2.23131300  | 0.00160100  | H           | 3.32116400  | 4.49526200  | 2.81031900  |
| C          | -4.16906900 | 0.26305100  | -3.27808100 | H           | 3.08731500  | 0.40304400  | 4.12380400  |
| H          | -3.15289800 | -1.37083800 | -2.33069600 | H           | 3.86395700  | 2.74070100  | 4.48914800  |
| C          | -4.61943600 | 1.58013800  | -3.16154600 |             |             |             |             |
| H          | -4.72802000 | 3.30934800  | -1.87665600 | <b>CP18</b> |             |             |             |
| H          | -4.32800400 | -0.28954600 | -4.20039800 | Ni          | 0.06434500  | 0.53001600  | -0.14097000 |
| H          | -5.13226300 | 2.05854500  | -3.99184800 | P           | 1.80235400  | -0.87966100 | 0.00481900  |
| C          | -2.70151200 | 0.45694200  | 1.87781700  | C           | 1.57003500  | -2.16027200 | -1.30883800 |
| C          | -4.01571700 | 0.79689100  | 2.24022300  | C           | 1.71496100  | -3.53941800 | -1.11031200 |
| C          | -1.66243800 | 0.73435500  | 2.77619600  | C           | 1.20463700  | -1.69275600 | -2.58600800 |
| C          | -4.27524700 | 1.42908400  | 3.45552700  | C           | 1.51952300  | -4.43148300 | -2.16737100 |
| H          | -4.84008100 | 0.56319400  | 1.57279400  | H           | 1.96731000  | -3.92708600 | -0.12951700 |
| C          | -1.92299100 | 1.35833600  | 3.99965700  | C           | 1.02497500  | -2.58668100 | -3.64237400 |
| H          | -0.64493000 | 0.45474300  | 2.52209500  | H           | 1.06717900  | -0.62797700 | -2.76205100 |
| C          | -3.22865700 | 1.71350100  | 4.33793200  | C           | 1.18306800  | -3.95901400 | -3.43607900 |
| H          | -5.29660400 | 1.69149100  | 3.71897600  | H           | 1.63010000  | -5.49872600 | -1.99417700 |
| H          | -1.10325400 | 1.56308300  | 4.68308700  | H           | 0.75554200  | -2.20711200 | -4.62439300 |
| H          | -3.43414400 | 2.20064600  | 5.28750800  | H           | 1.03702700  | -4.65546000 | -4.25763500 |
| C          | -3.23135200 | -2.04295000 | 0.71094900  | C           | 2.08154500  | -1.76996800 | 1.60136000  |
| C          | -4.52790600 | -2.32225400 | 0.25963300  | C           | 3.16143400  | -2.64709300 | 1.80361800  |
| C          | -2.59904400 | -2.95669000 | 1.57055200  | C           | 1.22819400  | -1.49450300 | 2.67954400  |
| C          | -5.17460500 | -3.49757000 | 0.65022700  | C           | 3.35692000  | -3.25846200 | 3.04190300  |
| H          | -5.03618600 | -1.62990900 | -0.40391200 | H           | 3.86174300  | -2.83859400 | 0.99576500  |
| C          | -3.25067100 | -4.12427100 | 1.96640800  | C           | 1.43029000  | -2.09755900 | 3.92415400  |
| H          | -1.59246200 | -2.75576600 | 1.92887300  | H           | 0.40645800  | -0.79652300 | 2.54338500  |
| C          | -4.53954600 | -4.40029800 | 1.50350200  | C           | 2.49047600  | -2.98616900 | 4.10465600  |
| H          | -6.17752300 | -3.70445000 | 0.28545200  | H           | 4.19341200  | -3.93821700 | 3.18132000  |
| H          | -2.74673600 | -4.82162900 | 2.63029900  | H           | 0.76172000  | -1.86763200 | 4.74957400  |
| H          | -5.04413700 | -5.31438300 | 1.80508700  | H           | 2.65032400  | -3.45631400 | 5.07139900  |
| P          | 0.85970600  | 1.33208300  | -0.20841900 | C           | 3.52325700  | -0.26279400 | -0.32683900 |
| C          | -0.15862300 | 2.85835400  | -0.52279900 | C           | 4.16223200  | -0.42132500 | -1.56443500 |
| C          | -0.31475100 | 3.38967500  | -1.81159500 | C           | 4.19703700  | 0.42823800  | 0.69425400  |
| C          | -0.83843800 | 3.47542300  | 0.54201200  | C           | 5.44498600  | 0.09206600  | -1.77248000 |
| C          | -1.12029000 | 4.50990000  | -2.02906400 | H           | 3.66862700  | -0.95251900 | -2.37070600 |
| H          | 0.19991800  | 2.93784000  | -2.65301200 | C           | 5.47694500  | 0.93834700  | 0.48521600  |
| C          | -1.63507100 | 4.60011500  | 0.32453700  | H           | 3.72257100  | 0.56938100  | 1.66044100  |
| H          | -0.73966000 | 3.08617500  | 1.54992500  | C           | 6.10693700  | 0.77047400  | -0.74996500 |
| C          | -1.77874400 | 5.12276000  | -0.96291500 | H           | 5.92515000  | -0.04541400 | -2.73790400 |
| H          | -1.22314300 | 4.90679600  | -3.03559400 | H           | 5.97784500  | 1.47422300  | 1.28658200  |
| H          | -2.14088300 | 5.06843600  | 1.16505100  | H           | 7.10485100  | 1.16869800  | -0.91351100 |

|            |             |             |             |             |             |             |             |
|------------|-------------|-------------|-------------|-------------|-------------|-------------|-------------|
| P          | -1.84561000 | -0.65745600 | H           | -4.34596000 | 5.77960800  | 0.86076700  |             |
| 0.13479900 |             |             |             |             |             |             |             |
| C          | -1.83316700 | -2.51485800 | 0.03181800  | <b>TS10</b> |             |             |             |
| C          | -2.21677700 | -3.18535000 | -1.13930300 | Ni          | 0.12617800  | 0.40230000  | -0.49633600 |
| C          | -1.38445300 | -3.27996800 | 1.12238300  | C           | 0.13435800  | 2.67607800  | -0.56263900 |
| C          | -2.16105300 | -4.57873500 | -1.21483500 | C           | 1.27037000  | 1.87440400  | -0.87667900 |
| H          | -2.56745400 | -2.62280200 | -1.99780800 | C           | -0.29069900 | 1.97569200  | -1.68965900 |
| C          | -1.33568900 | -4.67201900 | 1.04777400  | O           | -0.87695800 | 2.01198200  | -2.76596200 |
| H          | -1.08044100 | -2.79315300 | 2.04277600  | C           | -0.21896600 | 3.85344300  | 0.22825100  |
| C          | -1.72559100 | -5.32768600 | -0.12178600 | C           | -1.41825900 | 4.53922700  | -0.03670700 |
| H          | -2.46551700 | -5.07633300 | -2.13178000 | C           | 0.60692500  | 4.30110100  | 1.27599400  |
| H          | -0.99409600 | -5.24256400 | 1.90765700  | C           | -1.77414600 | 5.65269400  | 0.72245000  |
| H          | -1.69050000 | -6.41248300 | -0.17922600 | H           | -2.06222700 | 4.18778900  | -0.83733700 |
| C          | -3.12083700 | -0.22757400 | -1.13934400 | C           | 0.24660000  | 5.41461900  | 2.03096600  |
| C          | -4.50026400 | -0.26999000 | -0.88705900 | H           | 1.53436700  | 3.77396500  | 1.48221400  |
| C          | -2.67827300 | 0.11893100  | -2.42638800 | C           | -0.94452300 | 6.09451000  | 1.75638800  |
| C          | -5.41569000 | 0.01882700  | -1.90039800 | H           | -2.70263800 | 6.17528300  | 0.50806200  |
| H          | -4.86673000 | -0.51699700 | 0.10395500  | H           | 0.89464800  | 5.75572400  | 2.83437200  |
| C          | -3.59646700 | 0.39401400  | -3.44243900 | H           | -1.22456900 | 6.96254500  | 2.34753800  |
| H          | -1.61753800 | 0.20656900  | -2.63684000 | C           | 2.65488400  | 2.33836000  | -1.04276300 |
| C          | -4.96701500 | 0.34479400  | -3.18205200 | C           | 2.90178700  | 3.69917500  | -1.33831100 |
| H          | -6.48086300 | -0.00964700 | -1.68569600 | C           | 3.76763500  | 1.47818800  | -0.98464300 |
| H          | -3.23311800 | 0.66506700  | -4.42988500 | C           | 4.19402200  | 4.17191900  | -1.54771200 |
| H          | -5.68161500 | 0.56876300  | -3.96979400 | H           | 2.06327300  | 4.38463100  | -1.41498100 |
| C          | -2.68183500 | -0.36616800 | 1.76094000  | C           | 5.06233300  | 1.95439200  | -1.18494000 |
| C          | -3.63815300 | -1.24041600 | 2.30601400  | H           | 3.61923400  | 0.42882000  | -0.77015300 |
| C          | -2.34612600 | 0.79355200  | 2.47633400  | C           | 5.28597900  | 3.30305500  | -1.46752900 |
| C          | -4.24604200 | -0.95484700 | 3.52923000  | H           | 4.34871400  | 5.22330400  | -1.77779700 |
| H          | -3.89977100 | -2.15365600 | 1.78069600  | H           | 5.89986800  | 1.26389800  | -1.12275700 |
| C          | -2.95730600 | 1.08020300  | 3.69869400  | H           | 6.29538600  | 3.67170800  | -1.63017400 |
| H          | -1.61241000 | 1.47959100  | 2.06630600  | P           | -2.03735300 | -0.27079000 | -0.24537100 |
| C          | -3.90800600 | 0.20674600  | 4.22800800  | C           | -2.31173300 | -0.95726400 | 1.45102800  |
| H          | -4.98327900 | -1.64164400 | 3.93692500  | C           | -3.02530200 | -2.12753300 | 1.73885400  |
| H          | -2.68960200 | 1.98769600  | 4.23308900  | C           | -1.76384600 | -0.22289400 | 2.51834200  |
| H          | -4.38241100 | 0.42731200  | 5.18063400  | C           | -3.20269700 | -2.54289900 | 3.06103700  |
| C          | 0.90915100  | 2.19736900  | -0.70706200 | H           | -3.43826600 | -2.72656900 | 0.93465800  |
| C          | -0.58522300 | 2.28809000  | -0.74880800 | C           | -1.95540600 | -0.62944000 | 3.83872600  |
| C          | 0.19202400  | 2.11030500  | -1.95258300 | H           | -1.18977300 | 0.67688300  | 2.30956000  |
| O          | 0.22623400  | 2.04694000  | -3.17730200 | C           | -2.67853100 | -1.79251700 | 4.11359500  |
| C          | 2.03049900  | 2.99849400  | -0.20202600 | H           | -3.75416600 | -3.45691400 | 3.26518000  |
| C          | 2.94982000  | 3.56342100  | -1.10369700 | H           | -1.53479200 | -0.04140200 | 4.65033900  |
| C          | 2.20406400  | 3.24304400  | 1.17217300  | H           | -2.82500100 | -2.11493100 | 5.14113000  |
| C          | 3.99928300  | 4.35777700  | -0.64381400 | C           | -2.66694900 | -1.53047100 | -1.44093800 |
| H          | 2.82377900  | 3.37694200  | -2.16625700 | C           | -4.01260400 | -1.93523100 | -1.47676900 |
| C          | 3.25266100  | 4.03877900  | 1.63060700  | C           | -1.77985400 | -2.05142800 | -2.39379100 |
| H          | 1.50966500  | 2.79528000  | 1.87908600  | C           | -4.44796400 | -2.86690000 | -2.41887700 |
| C          | 4.15456600  | 4.60135700  | 0.72326000  | H           | -4.72519100 | -1.50775500 | -0.77710700 |
| H          | 4.69762100  | 4.79025200  | -1.35592500 | C           | -2.21769200 | -2.97918500 | -3.34245900 |
| H          | 3.36616900  | 4.22188200  | 2.69648900  | H           | -0.74789000 | -1.71242000 | -2.40343500 |
| H          | 4.97101000  | 5.22459300  | 1.07892100  | C           | -3.54978000 | -3.39363500 | -3.35147100 |
| C          | -1.61547700 | 3.23325200  | -0.29585100 | H           | -5.49076200 | -3.17300300 | -2.43299400 |
| C          | -1.46915100 | 3.95664000  | 0.90322700  | H           | -1.51858200 | -3.36751600 | -4.07823900 |
| C          | -2.76578700 | 3.46132100  | -1.07382800 | H           | -3.89251400 | -4.11284500 | -4.09076600 |
| C          | -2.44245700 | 4.86617100  | 1.31467700  | C           | -3.38508600 | 1.00965400  | -0.35917400 |
| H          | -0.57378500 | 3.81687500  | 1.50155900  | C           | -4.10929600 | 1.45558000  | 0.75633100  |
| C          | -3.73990600 | 4.36737500  | -0.65707200 | C           | -3.68001600 | 1.56126300  | -1.61932600 |
| H          | -2.88641700 | 2.92203600  | -2.00723600 | C           | -5.10268200 | 2.42893500  | 0.61833400  |
| C          | -3.58605100 | 5.07206000  | 0.53943500  | H           | -3.90979000 | 1.04407900  | 1.73936600  |
| H          | -2.30428300 | 5.42047700  | 2.23997500  | C           | -4.67460900 | 2.53009600  | -1.75237100 |
| H          | -4.62134100 | 4.52718900  | -1.27307200 | H           | -3.11539000 | 1.25630300  | -2.49230000 |

|             |             |             |             |            |             |             |             |
|-------------|-------------|-------------|-------------|------------|-------------|-------------|-------------|
| C           | -5.39032700 | 2.96795500  | -0.63501900 | H          | 1.29741500  | -0.51801400 | -2.41311800 |
| H           | -5.65287500 | 2.75907900  | 1.49581800  | C          | 2.95053800  | -3.23135500 | -3.61896500 |
| H           | -4.88629200 | 2.94466800  | -2.73450400 | H          | 2.98102900  | -5.17439200 | -2.67928100 |
| H           | -6.16552100 | 3.72242400  | -0.74216300 | H          | 2.69817200  | -1.20751400 | -4.32628500 |
| P           | 1.40836900  | -1.31064600 | 0.21614800  | H          | 3.56600400  | -3.53899600 | -4.46020300 |
| C           | 0.69941400  | -2.83520100 | 1.00950700  | C          | -0.99869500 | -3.27463400 | -0.17947700 |
| C           | 0.77707000  | -3.05255900 | 2.39323700  | C          | -1.10582600 | -4.28248500 | 0.78819800  |
| C           | 0.02802200  | -3.78508900 | 0.22033600  | C          | -1.81562100 | -3.34016300 | -1.31966100 |
| C           | 0.21358100  | -4.19337100 | 2.96858200  | C          | -2.00710400 | -5.33676000 | 0.61495400  |
| H           | 1.28560400  | -2.33467600 | 3.02794300  | H          | -0.48682300 | -4.25266800 | 1.67875200  |
| C           | -0.53095200 | -4.92590600 | 0.79576700  | C          | -2.71081400 | -4.39312000 | -1.49176000 |
| H           | -0.05135500 | -3.64356200 | -0.85236500 | H          | -1.75492700 | -2.56063500 | -2.07408700 |
| C           | -0.43695300 | -5.13663800 | 2.17295600  | C          | -2.80845600 | -5.39670900 | -0.52423400 |
| H           | 0.29007300  | -4.34400800 | 4.04224300  | H          | -2.07712900 | -6.11203000 | 1.37386200  |
| H           | -1.03721400 | -5.65135100 | 0.16412400  | H          | -3.33988900 | -4.42468800 | -2.37687900 |
| H           | -0.86807100 | -6.02792900 | 2.62134300  | H          | -3.50884900 | -6.21693200 | -0.65763900 |
| C           | 2.70894900  | -0.83135900 | 1.44981700  | P          | 1.62702800  | 1.44704900  | -0.00826100 |
| C           | 3.91719700  | -1.52275900 | 1.62783400  | C          | 3.14502500  | 0.60570800  | 0.66804300  |
| C           | 2.44054600  | 0.27691600  | 2.26747100  | C          | 3.49418800  | 0.70502500  | 2.02373500  |
| C           | 4.83101000  | -1.11498400 | 2.60061200  | C          | 3.96111100  | -0.16904700 | -0.17486300 |
| H           | 4.15759000  | -2.37397200 | 0.99942900  | C          | 4.62931100  | 0.05963100  | 2.51862500  |
| C           | 3.34800600  | 0.67586400  | 3.25072400  | H          | 2.88775700  | 1.29864100  | 2.69882300  |
| H           |             | 1.52150700  | 0.83639100  | C          | 5.09748200  | -0.80917100 | 0.32007700  |
| 2.11674300  |             |             |             | H          | 3.72300100  | -0.26275300 | -1.22847600 |
| C           | 4.54678200  | -0.01848800 | 3.41788700  | C          | 5.43810900  | -0.69523200 | 1.66930500  |
| H           | 5.76660900  | -1.65533200 | 2.71947300  | H          | 4.88252900  | 0.15674500  | 3.57104100  |
| H           | 3.12309000  | 1.53616900  | 3.87562900  | H          | 5.71903500  | -1.39269400 | -0.35429100 |
| H           | 5.25985100  | 0.29662800  | 4.17503900  | H          | 6.32718800  | -1.18849300 | 2.05359100  |
| C           | 2.31696300  | -2.05794000 | -1.22046400 | C          | 1.41789000  | 2.83753600  | 1.19575800  |
| C           | 2.95830000  | -3.30805700 | -1.15800200 | C          | 2.07902300  | 4.06658000  | 1.07908500  |
| C           | 2.33602700  | -1.35198100 | -2.43463800 | C          | 0.57414400  | 2.62305000  | 2.29633800  |
| C           | 3.62108200  | -3.82381500 | -2.27197800 | C          | 1.90342300  | 5.05763000  | 2.04636700  |
| H           | 2.91974200  | -3.89424500 | -0.24494900 | H          | 2.71645600  | 4.26496300  | 0.22420800  |
| C           | 2.99621800  | -1.87241100 | -3.55065100 | C          | 0.40765300  | 3.61053800  | 3.26849600  |
| H           | 1.82988900  | -0.39259000 | -2.50141300 | H          | 0.03108900  | 1.68555900  | 2.38234000  |
| C           | 3.64335400  | -3.10574500 | -3.47054500 | C          | 1.07213400  | 4.83182100  | 3.14472500  |
| H           | 4.11329000  | -4.79069100 | -2.20570300 | H          |             | 2.41314900  | 6.01116500  |
| H           | 3.00003500  | -1.31056300 | -4.48065600 | 1.93558700 |             |             |             |
| H           | 4.15627900  | -3.51122300 | -4.33878000 | H          | -0.25214400 | 3.42951700  | 4.11290700  |
| <b>CP19</b> |             |             |             | H          | 0.93531200  | 5.60645100  | 3.89459300  |
| Ni          | -0.44490400 | 0.39443000  | -0.21913400 | C          | 2.29455800  | 2.20229800  | -1.56082900 |
| P           | 0.22484800  | -1.88423900 | -0.07933200 | C          | 3.61375800  | 2.67863800  | -1.65344100 |
| C           | 1.07052500  | -2.22664100 | 1.52832600  | C          | 1.46686300  | 2.28926400  | -2.69089400 |
| C           | 2.26479600  | -2.94271400 | 1.68448900  | C          | 4.08798400  | 3.23567300  | -2.84211000 |
| C           | 0.43148900  | -1.72487500 | 2.67688800  | H          | 4.28020000  | 2.60224100  | -0.80004200 |
| C           | 2.79468600  | -3.16813400 | 2.95727300  | C          | 1.94575000  | 2.83871000  | -3.88159500 |
| H           | 2.79499600  | -3.31633100 | 0.81588500  | H          | 0.44192300  | 1.94371100  | -2.63022800 |
| C           | 0.95557600  | -1.96014100 | 3.94780200  | C          | 3.25496700  | 3.31569800  | -3.95981700 |
| H           | -0.48342800 | -1.14668900 | 2.57208400  | H          | 5.11001900  | 3.60179300  | -2.89425000 |
| C           | 2.13954600  | -2.68690500 | 4.09125000  | H          | 1.28965600  | 2.89873700  | -4.74581100 |
| H           | 3.72480300  | -3.72087000 | 3.05888600  | H          | 3.62561000  | 3.74591400  | -4.88658500 |
| H           | 0.44203800  | -1.57161700 | 4.82336200  | C          | -2.60949500 | 1.68446700  | -0.28435700 |
| H           | 2.55246500  | -2.86913600 | 5.07986400  | C          | -2.38835900 | 0.32776200  | -0.15403200 |
| C           | 1.35940900  | -2.43835200 | -1.43661700 | C          | -1.24057600 | 2.12023800  | -0.52967400 |
| C           | 1.82426400  | -3.76109600 | -1.54252600 | O          | -0.79199800 | 3.20641600  | -0.87475600 |
| C           | 1.67687900  | -1.53362400 | -2.45935800 | C          | -3.81616300 | 2.53834900  | -0.20780000 |
| C           | 2.62433000  | -4.14961800 | -2.61658600 | C          | -3.80997100 | 3.80595000  | -0.82383900 |
| H           | 1.54113100  | -4.49611000 | -0.79496700 | C          | -4.96839700 | 2.15091000  | 0.50406700  |
| C           | 2.46689500  | -1.92535300 | -3.54390300 | C          | -4.92510600 | 4.64010400  | -0.75071800 |
|             |             |             |             | H          | -2.91638500 | 4.12985100  | -1.34500000 |

|                        |             |             |             |   |             |             |             |
|------------------------|-------------|-------------|-------------|---|-------------|-------------|-------------|
| C                      | -6.07843400 | 2.99005800  | 0.57726200  | C | -2.28305100 | 2.35257600  | -0.96790900 |
| H                      | -4.99047400 | 1.19064200  | 1.00714300  | C | -2.82402300 | 2.36323500  | -2.26602800 |
| C                      | -6.06589000 | 4.23653300  | -0.05436400 | C | -2.53735500 | 3.45094700  | -0.12651800 |
| H                      | -4.89957100 | 5.61228100  | -1.23716500 | C | -3.61039300 | 3.42947400  | -2.70057300 |
| H                      | -6.95646000 | 2.66992200  | 1.13317300  | H | -2.62502700 | 1.53107900  | -2.93466900 |
| H                      | -6.93400300 | 4.88850500  | 0.00282800  | C | -3.32614600 | 4.51326400  | -0.56378700 |
| C                      | -3.45688000 | -0.67689100 | -0.02584500 | H | -2.11197000 | 3.47111500  | 0.87160000  |
| C                      | -3.57545500 | -1.49037800 | 1.11502200  | C | -3.86844400 | 4.50739300  | -1.85160800 |
| C                      | -4.41404300 | -0.83178700 | -1.04900700 | H | -4.02237700 | 3.41618800  | -3.70619000 |
| C                      | -4.62233200 | -2.40309700 | 1.24182100  | H | -3.51188600 | 5.35257700  | 0.10171900  |
| H                      | -2.84574500 | -1.39225000 | 1.91428100  | H | -4.48181900 | 5.33773800  | -2.19101000 |
| C                      | -5.44932400 | -1.75668100 | -0.92962000 | C | -1.56703000 | 0.86588900  | 2.01606700  |
| H                      | -4.34109400 | -0.20785000 | -1.93568200 | C | -0.69627500 | 0.70821300  | 3.11449500  |
| C                      | -5.56356800 | -2.54318600 | 0.21985600  | C | -2.92114600 | 1.17207600  | 2.27811500  |
| H                      | -4.69746700 | -3.01303800 | 2.13854900  | C | -1.14711800 | 0.89557300  | 4.41998800  |
| H                      | -6.17692400 | -1.85515300 | -1.73182400 | H | 0.34215100  | 0.44726100  | 2.93023700  |
| H                      | -6.37528100 | -3.25943700 | 0.31650500  | C | -3.37463500 | 1.32635000  | 3.58569200  |
| <b>PPh<sub>3</sub></b> |             |             |             | H | -3.61405300 | 1.26998200  | 1.44892400  |
| P                      | 0.00005200  | -0.00069200 | -1.20788900 | C | -2.48860700 | 1.20102900  | 4.66077200  |
| C                      | 1.01941400  | -1.32334000 | -0.40353300 | H | -0.45424200 | 0.78762100  | 5.25020000  |
| C                      | 0.64741600  | -2.02401300 | 0.75431500  | H | -4.42218700 | 1.55192000  | 3.76808700  |
| C                      | 2.23257600  | -1.65822000 | -1.02951100 | H | -2.84481600 | 1.33198900  | 5.67906100  |
| C                      | 1.47141100  | -3.02424000 | 1.27607500  | C | 0.46336700  | -2.65580500 | -0.53618200 |
| H                      | -0.29087100 | -1.79067800 | 1.24840600  | H | 0.68778200  | -2.77148400 | -1.59318700 |
| C                      | 3.06113500  | -2.64887900 | -0.50222700 | C | -0.88740700 | -2.43505300 | -0.16538400 |
| H                      | 2.52642100  | -1.14089900 | -1.94009300 | H | -1.19174800 | -2.68012800 | 0.84893600  |
| C                      | 2.68068200  | -3.33673500 | 0.65242900  | C | 1.34140300  | -3.45930000 | 0.35570400  |
| H                      | 1.16684600  | -3.55904400 | 2.17226700  | F | 1.06003700  | -3.24753900 | 1.68161100  |
| H                      | 3.99744000  | -2.89105300 | -0.99840000 | F | 1.20846700  | -4.79397100 | 0.15756200  |
| H                      | 3.31973200  | -4.11597600 | 1.05945700  | F | 2.65925500  | -3.18441200 | 0.19426300  |
| C                      | -1.65571800 | -0.22112300 | -0.40418900 | C | -1.95243100 | -2.38949900 | -1.20384600 |
| C                      | -2.07325500 | 0.44727300  | 0.75723100  | O | -1.67549800 | -2.49439100 | -2.39714000 |
| C                      | -2.55603100 | -1.09782500 | -1.03387500 | C | -3.38348500 | -2.24028200 | -0.77627000 |
| C                      | -3.35170100 | 0.23584800  | 1.27908200  | C | -3.78319200 | -1.97496000 | 0.54080300  |
| H                      | -1.39954800 | 1.13856600  | 1.25445600  | C | -4.37727000 | -2.37645300 | -1.76065700 |
| C                      | -3.82884100 | -1.31760900 | -0.50690600 | C | -5.13578400 | -1.85220200 | 0.86090800  |
| H                      | -2.25712100 | -1.60796200 | -1.94683500 | H | -3.04695000 | -1.83941800 | 1.32546100  |
| C                      | -4.23077300 | -0.64874500 | 0.65163600  | C | -5.72226100 | -2.25834200 | -1.43519400 |
| H                      | -3.65982300 | 0.76377400  | 2.17812400  | H | -4.06282900 | -2.57775300 | -2.77946900 |
| H                      | -4.50969800 | -2.00225000 | -1.00610100 | C | -6.12793200 | -1.99522900 | -0.11599900 |
| H                      | -5.22544200 | -0.81097300 | 1.05855600  | H | -5.42233500 | -1.63914800 | 1.88817500  |
| C                      | 0.63659300  | 1.54309200  | -0.40335600 | H | -6.47494100 | -2.37069400 | -2.21289700 |
| C                      | 1.41323400  | 1.57128000  | 0.76555400  | C | -7.59322500 | -1.87742500 | 0.23022400  |
| C                      | 0.33647200  | 2.76028500  | -1.03881500 | H | -8.09519900 | -1.13700400 | -0.40458400 |
| C                      | 1.86734800  | 2.78429000  | 1.28881000  | H | -8.11467900 | -2.83184500 | 0.08179400  |
| H                      | 1.66773500  | 0.64236300  | 1.26699100  | H | -7.73695100 | -1.57940400 | 1.27360400  |
| C                      | 0.78034200  | 3.97267900  | -0.51041300 | P | 2.30156500  | 0.24405600  | -0.12178300 |
| H                      | -0.24598200 | 2.75562300  | -1.95738100 | C | 2.24249500  | 2.01352600  | -0.65358000 |
| C                      | 1.54963500  | 3.98715000  | 0.65533600  | C | 2.85555200  | 2.47630700  | -1.82643800 |
| H                      | 2.47002400  | 2.78798500  | 2.19363300  | C | 1.52199600  | 2.92469600  | 0.13868400  |
| H                      | 0.53490200  | 4.90415900  | -1.01400800 | C | 2.75247200  | 3.81974000  | -2.19653600 |
| H                      | 1.90497600  | 4.92974500  | 1.06340500  | H | 3.41397300  | 1.79166100  | -2.45556500 |
| <b>CP20</b>            |             |             |             | C | 1.42667700  | 4.26559900  | -0.22961200 |
| Ni                     | 0.16266900  | -0.71715200 | 0.00279600  | H | 1.03823100  | 2.58656800  | 1.05048800  |
| C                      | -1.43138200 | 1.22392400  | -0.53268700 | C | 2.03998000  | 4.71671300  | -1.40115300 |
| C                      | -1.06881900 | 0.62844500  | 0.66338700  | H | 3.23250900  | 4.16136000  | -3.10967300 |
| C                      | -0.61826300 | 0.43210400  | -1.40542700 | H | 0.86612100  | 4.95620600  | 0.39431000  |
| O                      | -0.27391500 | 0.28568300  | -2.53880100 | H | 1.95925000  | 5.76054400  | -1.69204800 |
|                        |             |             |             | C | 3.47508500  | -0.53302800 | -1.31360500 |
|                        |             |             |             | C | 4.83765200  | -0.71081700 | -1.03614200 |

|             |            |            |            |             |            |            |            |
|-------------|------------|------------|------------|-------------|------------|------------|------------|
| C           | 2.9660000  | -0.9659390 | -2.5501110 | C           | -3.7864070 | -3.1828740 | 0.0978380  |
| C           | 5.6760640  | -1.3108880 | -1.9781320 | C           | -4.4477830 | -1.1342380 | -0.9896680 |
| H           | 5.2476150  | -0.3907050 | -0.0837320 | C           | -5.1058040 | -3.3991410 | 0.4833330  |
| C           | 3.8105470  | -1.5527470 | -3.4928820 | H           | -3.0348870 | -3.9252440 | 0.3473810  |
| H           | 1.9109620  | -0.8409130 | -2.7762220 | C           | -5.7631900 | -1.3523080 | -0.5931220 |
| C           | 5.1662580  | -1.7307530 | -3.2074640 | H           | -4.1901760 | -0.2567890 | -1.5709690 |
| H           | 6.7288560  | -1.4507210 | -1.7473090 | C           | -6.1172650 | -2.4849690 | 0.1540670  |
| H           | 3.4042430  | -1.8798330 | -4.4461330 | H           | -5.3579080 | -4.2966530 | 1.0434490  |
| H           | 5.8206750  | -2.1988030 | -3.9379930 | H           | -6.5312340 | -0.6333000 | -0.8693030 |
| C           | 3.2308400  | 0.3383940  | 1.4736740  | C           | -7.5405010 | -2.7054070 | 0.6070490  |
| C           | 4.1153830  | 1.3943550  | 1.7523110  | H           | -7.7045970 | -2.2850410 | 1.6086240  |
| C           | 3.0604700  | -0.6722150 | 2.4339780  | H           | -8.2558120 | -2.2245150 | -0.0683690 |
| C           | 4.8132730  | 1.4353650  | 2.9600640  | H           | -7.7846260 | -3.7718220 | 0.6601840  |
| H           | 4.2563040  | 2.1890080  | 1.0267330  | P           | 2.2486690  | 0.1820070  | -0.0039240 |
| C           | 3.7610130  | -0.6276390 | 3.6414110  | C           | 3.4777100  | -0.5234200 | -1.1893320 |
| H           | 2.3924540  | -1.5029700 | 2.2413750  | C           | 4.7831490  | -0.8619040 | -0.8073770 |
| C           | 4.6373310  | 0.4251250  | 3.9081160  | C           | 3.0847090  | -0.7278380 | -2.5230910 |
| H           | 5.4937290  | 2.2590120  | 3.1593140  | C           | 5.6768670  | -1.3950040 | -1.7387620 |
| H           | 3.6179280  | -1.4189030 | 4.3723350  | H           | 5.1057270  | -0.7194430 | 0.2186330  |
| H           | 5.1793930  | 0.4598650  | 4.8493530  | C           | 3.9839290  | -1.2495640 | -3.4530240 |
| <b>TS11</b> |            |            |            | H           | 2.0779150  | -0.4734130 | -2.8400200 |
| Ni          | 0.2055960  | -0.7227190 | -0.0016770 | C           | 5.2814240  | -1.5889410 | -3.0624040 |
| C           | -1.3904210 | 1.2537200  | -0.7250680 | H           | 6.6831170  | -1.6600940 | -1.4251120 |
| C           | -0.9907430 | 0.7039970  | 0.4695350  | H           | 3.6658110  | -1.3987490 | -4.4813660 |
| C           | -0.7500040 | 0.5590470  | -1.8253370 | H           | 5.9778070  | -2.0055520 | -3.7851880 |
| O           | -0.0882790 | 0.6647880  | -2.7868850 | C           | 3.0463260  | 0.0044400  | 1.6533280  |
| C           | -2.2529840 | 2.4035040  | -1.1244900 | C           | 3.9469750  | 0.9568830  | 2.1578690  |
| C           | -3.0384600 | 2.3369870  | -2.2887090 | C           | 2.7468960  | -1.1269440 | 2.4303650  |
| C           | -2.2592650 | 3.5959910  | -0.3796400 | C           | 4.5360580  | 0.7790780  | 3.4108260  |
| C           | -3.8191190 | 3.4228560  | -2.6866510 | H           | 4.1859420  | 1.8402320  | 1.5742790  |
| H           | -3.0372270 | 1.4263880  | -2.8823090 | C           | 3.3400530  | -1.3017340 | 3.6819770  |
| C           | -3.0476870 | 4.6746720  | -0.7748200 | H           | 2.0590100  | -1.8774330 | 2.0565580  |
| H           | -1.6415460 | 3.6730420  | 0.5084280  | C           | 4.2334820  | -0.3494940 | 4.1756360  |
| C           | -3.8316270 | 4.5948590  | -1.9292530 | H           | 5.2305400  | 1.5248010  | 3.7886280  |
| H           | -4.4194210 | 3.3492230  | -3.5897530 | H           | 3.0988730  | -2.1826000 | 4.2706830  |
| H           | -3.0406010 | 5.5871300  | -0.1839660 | H           | 4.6908090  | -0.4846800 | 5.1521790  |
| H           | -4.4404650 | 5.4405300  | -2.2373620 | C           | 2.3583320  | 2.0026710  | -0.3330180 |
| C           | -1.4913480 | 1.0946790  | 1.7968440  | C           | 3.1094790  | 2.5330200  | -1.3916790 |
| C           | -0.6429640 | 1.0322910  | 2.9210150  | C           | 1.6523650  | 2.8868020  | 0.5012610  |
| C           | -2.8433950 | 1.4375490  | 2.0160040  | C           | 3.1520760  | 3.9124580  | -1.6116670 |
| C           | -1.1042410 | 1.3599880  | 4.1952800  | H           | 3.6645960  | 1.8743080  | -2.0501310 |
| H           | 0.3864760  | 0.7142360  | 2.7868620  | C           | 1.7073270  | 4.2630760  | 0.2875100  |
| C           | -3.3108320 | 1.7315070  | 3.2947810  | H           | 1.0600250  | 2.5018910  | 1.3248580  |
| H           | -3.5308580 | 1.4522630  | 1.1769500  | C           | 2.4545750  | 4.7809700  | -0.7735880 |
| C           | -2.4417380 | 1.7105640  | 4.3895200  | H           | 3.7364010  | 4.3035340  | -2.4403000 |
| H           | -0.4216930 | 1.3192710  | 5.0403630  | H           | 1.1608000  | 4.9309900  | 0.9479960  |
| H           | -4.3591380 | 1.9819400  | 3.4372270  | H           | 2.4900550  | 5.8534720  | -0.9448300 |
| H           | -2.8077910 | 1.9493910  | 5.3845380  | <b>CP21</b> |            |            |            |
| C           | 0.4114560  | -2.4665250 | -0.8788060 | Ni          | -0.2395940 | -0.9217220 | -0.0067130 |
| H           | 0.5883990  | -2.3304170 | -1.9448710 | C           | 1.7718470  | 0.7887380  | 0.9072120  |
| C           | -0.9421070 | -2.3687530 | -0.3914380 | C           | 1.1791540  | 0.3523880  | -0.2471580 |
| H           | -1.1858550 | -2.9161710 | 0.5132650  | C           | 1.5382430  | 0.0447890  | 2.1766530  |
| C           | 1.2402480  | -3.5642580 | -0.3065900 | O           | 1.6237400  | 0.4850890  | 3.2977610  |
| F           | 1.0433740  | -3.7135980 | 1.0401770  | C           | 2.6277570  | 2.0025450  | 1.0757850  |
| F           | 0.9661600  | -4.7799890 | -0.8532920 | C           | 3.8549810  | 1.9396720  | 1.7580360  |
| F           | 2.5668720  | -3.3649770 | -0.4834710 | C           | 2.2163620  | 3.2426550  | 0.5611330  |
| C           | -2.0387700 | -1.7791770 | -1.0920210 | C           | 4.6529790  | 3.0740160  | 1.9024220  |
| O           | -1.8870430 | -0.9929240 | -2.0932970 | H           | 4.1875840  | 0.9933510  | 2.1743760  |
| C           | -3.4318240 | -2.0395370 | -0.6396000 | C           | 3.0135230  | 4.3774770  | 0.7069830  |

|   |             |             |             |             |             |             |             |
|---|-------------|-------------|-------------|-------------|-------------|-------------|-------------|
| H | 1.26418200  | 3.31347800  | 0.04629000  | H           | -6.20325200 | -0.31145400 | 2.64108600  |
| C | 4.23677800  | 4.29883900  | 1.37586000  | H           | -2.51983000 | -0.17991900 | 4.86339800  |
| H | 5.60083900  | 3.00075800  | 2.42971700  | H           | -4.99866600 | -0.43122900 | 4.81402200  |
| H | 2.67225000  | 5.32744600  | 0.30313900  | C           | -3.19091600 | 0.22489200  | -1.43436500 |
| H | 4.85682700  | 5.18401100  | 1.49207000  | C           | -4.17619500 | 1.18357500  | -1.73054700 |
| C | 1.57397400  | 0.73569000  | -1.61663100 | C           | -3.10039000 | -0.92336600 | -2.23524200 |
| C | 0.68584200  | 0.52771300  | -2.69416500 | C           | -5.05237600 | 0.99143700  | -2.79839900 |
| C | 2.87834100  | 1.17563600  | -1.93830900 | H           | -4.25383500 | 2.08502100  | -1.13046900 |
| C | 1.05035100  | 0.80150600  | -4.01135700 | C           | -3.97761600 | -1.11180900 | -3.30565600 |
| H | -0.30307200 | 0.12887500  | -2.48892600 | H           | -2.35093800 | -1.67670100 | -2.02055900 |
| C | 3.24958100  | 1.43442900  | -3.25518000 | C           | -4.95400400 | -0.15662800 | -3.58893100 |
| H | 3.60790900  | 1.30074200  | -1.14769000 | H           | -5.80924400 | 1.74050000  | -3.01507700 |
| C | 2.33609000  | 1.26323500  | -4.29909900 | H           | -3.89408300 | -2.00679500 | -3.91592400 |
| H | 0.33457500  | 0.63833600  | -4.81321600 | H           | -5.63464100 | -0.30295300 | -4.42332400 |
| H | 4.26197300  | 1.76831600  | -3.46817600 |             |             |             |             |
| H | 2.62935000  | 1.46973300  | -5.32508800 |             |             |             |             |
| C | -1.05950300 | -2.62554000 | 0.83074100  | <b>TS12</b> |             |             |             |
| H | -1.29758800 | -2.28532700 | 1.83511900  | Ni          | 0.26868800  | -0.92409200 | -0.03586100 |
| C | 0.28658300  | -2.83009300 | 0.45171100  | C           | -1.63552200 | 1.08298900  | -1.03101300 |
| H | 0.50798800  | -3.50532900 | -0.37003200 | C           | -1.38603000 | 0.27130400  | 0.04676300  |
| C | -2.09988000 | -3.52111900 | 0.25204700  | C           | -1.54711400 | 0.36334700  | -2.32280500 |
| F | -1.84155600 | -3.83529700 | -1.05005000 | O           | -1.46352300 | 0.81298700  | -3.44237200 |
| F | -2.20582800 | -4.70331000 | 0.91011700  | C           | -1.98446200 | 2.52058100  | -1.05591800 |
| F | -3.32974200 | -2.95579100 | 0.28640200  | C           | -2.86122900 | 3.03568600  | -2.03067600 |
| C | 1.34411100  | -1.99337600 | 0.86465500  | C           | -1.44380400 | 3.41249800  | -0.11116300 |
| O | 1.21719900  | -1.33205400 | 2.08579200  | C           | -3.19965100 | 4.38778600  | -2.04235300 |
| C | 2.73432100  | -2.23771100 | 0.39611900  | H           | -3.27446000 | 2.37515900  | -2.78403800 |
| C | 3.01645400  | -2.54941100 | -0.94294900 | C           | -1.78037800 | 4.76374300  | -0.12926400 |
| C | 3.79464000  | -2.22126600 | 1.31427800  | H           | -0.74601100 | 3.04477700  | 0.63211200  |
| C | 4.31564500  | -2.84642100 | -1.34338300 | C           | -2.66351000 | 5.25867500  | -1.09185200 |
| H | 2.21866700  | -2.53349300 | -1.68010400 | H           | -3.88334500 | 4.76105800  | -2.80035400 |
| C | 5.09355700  | -2.51732900 | 0.90222600  | H           | -1.34053400 | 5.43196500  | 0.60621700  |
| H | 3.59571500  | -1.99948000 | 2.35792900  | H           | -2.92434900 | 6.31369900  | -1.10643900 |
| C | 5.38072900  | -2.83417000 | -0.43073500 | C           | -1.80426400 | 0.51625300  | 1.44312400  |
| H | 4.50890800  | -3.08015100 | -2.38797300 | C           | -1.05480900 | -0.00596700 | 2.51464600  |
| H | 5.89729000  | -2.50847900 | 1.63505600  | C           | -3.00835400 | 1.18399300  | 1.74607400  |
| C | 6.79370500  | -3.12346400 | -0.88017100 | C           | -1.46125700 | 0.16904400  | 3.83758900  |
| H | 7.27634000  | -2.22211500 | -1.28168500 | H           | -0.14091500 | -0.55780400 | 2.29625700  |
| H | 7.41237800  | -3.48139000 | -0.05049200 | C           | -3.42030800 | 1.35111800  | 3.06557600  |
| H | 6.81615600  | -3.88114400 | -1.67128200 | H           | -3.62221100 | 1.56500700  | 0.93737000  |
| P | -2.02325800 | 0.43854600  | -0.02331900 | C           | -2.64613200 | 0.85233500  | 4.11759500  |
| C | -1.74027700 | 2.27278100  | -0.02366600 | H           | -0.85899900 | -0.23751700 | 4.64584600  |
| C | -1.82863600 | 3.03958200  | 1.14743500  | H           | -4.35280500 | 1.86881700  | 3.27433000  |
| C | -1.39999800 | 2.91879700  | -1.22529100 | H           | -2.97151600 | 0.98418700  | 5.14611300  |
| C | -1.58828800 | 4.41545100  | 1.11760400  | C           | 0.44742100  | -2.67850800 | -1.08812200 |
| H | -2.09427500 | 2.57321600  | 2.08936000  | H           | 0.63677600  | -2.32846300 | -2.09974600 |
| C | -1.16690800 | 4.29360300  | -1.25352100 | C           | -0.81018100 | -2.51280500 | -0.48284700 |
| H | -1.32019900 | 2.35351300  | -2.14741300 | H           | -1.08006200 | -3.15196900 | 0.35242200  |
| C | -1.26060200 | 5.04772600  | -0.08122800 | C           | 1.30610300  | -3.82895500 | -0.69223500 |
| H | -1.66185000 | 4.98984000  | 2.03688700  | F           | 1.14262200  | -4.17532400 | 0.61700300  |
| H | -0.91050500 | 4.77332400  | -2.19426000 | F           | 1.05301700  | -4.95100600 | -1.41313400 |
| H | -1.07895900 | 6.11883900  | -0.10368000 | F           | 2.62001400  | -3.55347900 | -0.86759500 |
| C | -3.02525400 | 0.16624700  | 1.50567900  | C           | -1.75817300 | -1.45752000 | -0.83017800 |
| C | -4.41900000 | 0.02119900  | 1.48726100  | O           | -1.60869300 | -1.01109700 | -2.15260600 |
| C | -2.35013200 | 0.08106600  | 2.73692600  | C           | -3.19373400 | -1.69622000 | -0.43053100 |
| C | -5.12334700 | -0.19444900 | 2.67391300  | C           | -3.53026900 | -2.20613200 | 0.83284200  |
| H | -4.96063800 | 0.06515000  | 0.54866500  | C           | -4.22860100 | -1.43560500 | -1.33799800 |
| C | -3.05854800 | -0.12262400 | 3.92174200  | C           | -4.85885500 | -2.45109400 | 1.16948800  |
| H | -1.26833000 | 0.17374200  | 2.78077700  | H           | -2.75701000 | -2.40168400 | 1.56922900  |
| C | -4.44783000 | -0.26305600 | 3.89265400  | C           | -5.55630000 | -1.68640200 | -0.99146300 |
|   |             |             |             | H           | -3.99621000 | -1.06475400 | -2.32990500 |

|             |             |             |             |   |             |             |             |
|-------------|-------------|-------------|-------------|---|-------------|-------------|-------------|
| C           | -5.89949000 | -2.19481000 | 0.26622600  | H | -4.35046500 | 0.28180800  | -1.79936700 |
| H           | -5.09022800 | -2.84745000 | 2.15565200  | C | -5.96241000 | -2.68682400 | -1.32565000 |
| H           | -6.33867600 | -1.48962000 | -1.72104000 | H | -5.12424900 | -4.35317200 | -0.25275000 |
| C           | -7.34040200 | -2.44030300 | 0.64803200  | H | -6.46726200 | -0.84466300 | -2.33280200 |
| H           | -7.44561600 | -3.34421500 | 1.25844500  | C | -7.26663100 | -3.37322500 | -1.65819000 |
| H           | -7.74520800 | -1.60501400 | 1.23534200  | H | -7.29754700 | -4.38970800 | -1.25354400 |
| H           | -7.97515800 | -2.55434100 | -0.23684900 | H | -8.12443500 | -2.82399400 | -1.24989300 |
| P           | 2.13950700  | 0.22860200  | 0.14374800  | H | -7.41668700 | -3.44050900 | -2.74301200 |
| C           | 2.12183300  | 2.03848500  | 0.54614000  | C | -1.91027600 | 1.65966000  | -0.73552400 |
| C           | 2.51644900  | 3.03075800  | -0.36160200 | C | -2.38363300 | 0.75142600  | 0.15396500  |
| C           | 1.67418400  | 2.42988300  | 1.82077300  | C | -1.33744400 | 0.91490700  | -1.89041200 |
| C           | 2.46825400  | 4.38094800  | -0.00300300 | O | -0.73537000 | 1.33505800  | -2.85469500 |
| H           | 2.86649300  | 2.75535200  | -1.35086200 | C | -1.91502900 | 3.13488800  | -0.69535400 |
| C           | 1.63695800  | 3.77652300  | 2.18051900  | C | -3.03292100 | 3.83682900  | -0.20974600 |
| H           | 1.35324000  | 1.68056200  | 2.53886500  | C | -0.81355000 | 3.86715600  | -1.17178700 |
| C           | 2.03404700  | 4.75791500  | 1.26742200  | C | -3.04345600 | 5.22951600  | -0.18685900 |
| H           | 2.77622000  | 5.13626200  | -0.72102300 | H | -3.89866200 | 3.28424800  | 0.14225300  |
| H           | 1.29494100  | 4.05864200  | 3.17283100  | C | -0.82638000 | 5.26163400  | -1.14142700 |
| H           | 2.00455600  | 5.80786200  | 1.54629900  | H | 0.04529900  | 3.34035600  | -1.57064500 |
| C           | 3.05103000  | 0.14308600  | -1.46141600 | C | -1.93791700 | 5.94804200  | -0.64980900 |
| C           | 4.41147500  | -0.18216000 | -1.55617000 | H | -3.91873800 | 5.75448200  | 0.18662100  |
| C           | 2.32673800  | 0.38330100  | -2.64288200 | H | 0.03614000  | 5.81158200  | -1.50825900 |
| C           | 5.03500700  | -0.25809000 | -2.80381500 | H | -1.94711700 | 7.03475300  | -0.63331800 |
| H           | 4.98663700  | -0.38647800 | -0.65929400 | C | -2.87000800 | 0.98382800  | 1.52984600  |
| C           | 2.95521800  | 0.31833100  | -3.88648500 | C | -2.16675500 | 1.86920700  | 2.37017700  |
| H           | 1.26845900  | 0.62404300  | -2.59991400 | C | -3.99170300 | 0.31473400  | 2.05157500  |
| C           | 4.31155600  | -0.00528700 | -3.96989100 | C | -2.57485600 | 2.08025000  | 3.68470000  |
| H           | 6.08870200  | -0.51823100 | -2.86097400 | H | -1.29225800 | 2.38345600  | 1.98448500  |
| H           | 2.37904300  | 0.51115400  | -4.78711600 | C | -4.40264100 | 0.53710800  | 3.36664500  |
| H           | 4.79936200  | -0.06624700 | -4.93902700 | H | -4.55068500 | -0.36951000 | 1.42415700  |
| C           | 3.32382400  | -0.40667800 | 1.41420200  | C | -3.69745400 | 1.41723200  | 4.18803800  |
| C           | 4.40633200  | 0.36561700  | 1.87013900  | H | -2.01419100 | 2.76194500  | 4.31866000  |
| C           | 3.14222700  | -1.69463000 | 1.94005400  | H | -5.27684300 | 0.01655400  | 3.74813800  |
| C           | 5.28860900  | -0.14343800 | 2.82307600  | H | -4.01659700 | 1.58370900  | 5.21331000  |
| H           | 4.55621000  | 1.36927800  | 1.48383400  | P | 2.74775700  | -0.21645500 | -0.01130700 |
| C           | 4.02603500  | -2.20136500 | 2.89567600  | C | 2.88545400  | 1.60781700  | 0.25059000  |
| H           | 2.31437000  | -2.30613000 | 1.59978200  | C | 3.50748300  | 2.47737700  | -0.65615600 |
| C           | 5.09965100  | -1.42835100 | 3.33866000  | C | 2.29421500  | 2.14287600  | 1.40932100  |
| H           | 6.12136900  | 0.46521800  | 3.16555200  | C | 3.54369100  | 3.85179100  | -0.40482200 |
| H           | 3.87156200  | -3.20134800 | 3.29184000  | H | 3.96032500  | 2.08369500  | -1.56067200 |
| H           | 5.78562000  | -1.82235800 | 4.08388200  | C | 2.33650200  | 3.51378200  | 1.66053000  |
| <b>CP22</b> |             |             |             | H | 1.80383500  | 1.48037300  | 2.12016200  |
| Ni          | 0.63448800  | -0.81919000 | 0.34248700  | C | 2.96069400  | 4.37217100  | 0.75137800  |
| C           | -0.33994000 | -2.42101600 | -0.05970300 | H | 4.02912000  | 4.51455100  | -1.11638300 |
| H           | -0.33641400 | -2.64622100 | -1.12526100 | H | 1.87781600  | 3.91265200  | 2.56126500  |
| C           | -1.21332700 | -1.42479600 | 0.45910200  | H | 2.98807000  | 5.44140900  | 0.94277700  |
| H           | -1.53326600 | -1.50387300 | 1.49840700  | C | 3.35057400  | -0.49322700 | -1.73076800 |
| C           | 0.04610800  | -3.59352500 | 0.77682100  | C | 4.66711900  | -0.88212400 | -2.02082400 |
| F           | 1.21496500  | -4.15198000 | 0.36076700  | C | 2.44091000  | -0.30858700 | -2.78650300 |
| F           | 0.19762200  | -3.28803400 | 2.08881900  | C | 5.06799900  | -1.07865600 | -3.34402300 |
| F           | -0.88118000 | -4.59398700 | 0.72518400  | H | 5.37902500  | -1.03658200 | -1.21609600 |
| C           | -2.19396300 | -0.66011300 | -0.41839800 | C | 2.85048500  | -0.49514600 | -4.10704400 |
| O           | -1.56691000 | -0.41609200 | -1.71042300 | H | 1.41429600  | -0.01428600 | -2.58722700 |
| C           | -3.51693400 | -1.38672600 | -0.70879500 | C | 4.16235800  | -0.88390000 | -4.38835800 |
| C           | -3.75661700 | -2.69627600 | -0.28571600 | H | 6.08890800  | -1.38536600 | -3.55620700 |
| C           | -4.51487100 | -0.73430900 | -1.45152300 | H | 2.13711600  | -0.34279600 | -4.91206100 |
| C           | -4.96405300 | -3.33203400 | -0.59125000 | H | 4.47644000  | -1.03871000 | -5.41726600 |
| H           | -2.99932900 | -3.23825700 | 0.26893600  | C | 4.06335700  | -0.91989800 | 1.07262000  |
| C           | -5.71268600 | -1.37264100 | -1.75340700 | C | 5.17924500  | -0.17820400 | 1.49031200  |
|             |             |             |             | C | 3.93204600  | -2.25408500 | 1.49102700  |



|             |             |             |             |    |             |             |             |
|-------------|-------------|-------------|-------------|----|-------------|-------------|-------------|
| C           | 6.14765300  | -0.76206300 | 2.30913600  | Ni | 0.77130000  | 0.27132200  | -0.43731900 |
| H           | 5.28987700  | 0.85682500  | 1.18085100  | P  | 0.85374400  | -1.99722000 | -0.52054200 |
| C           | 4.90599200  | -2.83568700 | 2.30385500  | C  | 0.91629500  | -2.94908600 | 1.06356500  |
| H           | 3.06929100  | -2.83589300 | 1.18218800  | C  | 2.13777800  | -3.35786600 | 1.62350500  |
| C           | 6.01314100  | -2.09109100 | 2.71626000  | C  | -0.25911600 | -3.15267500 | 1.80647300  |
| H           | 7.00573500  | -0.17708900 | 2.62980200  | C  | 2.17858400  | -3.98030600 | 2.87213600  |
| H           | 4.79324100  | -3.86871400 | 2.62146400  | H  | 3.06388700  | -3.19432400 | 1.08228900  |
| H           | 6.76636700  | -2.54307500 | 3.35617700  | C  | -0.21765200 | -3.78452300 | 3.04991400  |
| <b>CP23</b> |             |             |             | H  | -1.21665500 | -2.82394400 | 1.41380400  |
| C           | 0.05831600  | 1.86586000  | -1.29453700 | C  | 1.00117800  | -4.20364000 | 3.58645900  |
| H           | 0.08643900  | 2.78716000  | -0.71797200 | H  | 3.13498500  | -4.29002700 | 3.28495100  |
| C           | -1.00527700 | 0.93175000  | -1.08957600 | H  | -1.14172000 | -3.94665900 | 3.59766300  |
| H           | -1.41788000 | 0.39319600  | -1.94050500 | H  | 1.03265900  | -4.69406100 | 4.55564300  |
| C           | 0.60760700  | 2.06915300  | -2.66229900 | C  | 2.32050600  | -2.62034400 | -1.47537300 |
| F           | 1.77072200  | 2.77441400  | -2.64837500 | C  | 2.68125700  | -3.97874600 | -1.49000600 |
| F           | 0.86799800  | 0.90257300  | -3.32527000 | C  | 3.00651800  | -1.73164900 | -2.31256100 |
| F           | -0.23088400 | 2.76734600  | -3.48480700 | C  | 3.72222400  | -4.42742200 | -2.30102100 |
| C           | -2.03512600 | 1.25236900  | 0.00081700  | H  | 2.14508000  | -4.69045400 | -0.86924600 |
| O           | -1.38196300 | 1.16066500  | 1.30289900  | C  | 4.04255900  | -2.18400600 | -3.13401200 |
| C           | -2.64029700 | 2.67006900  | -0.09755300 | H  | 2.72222400  | -0.68555900 | -2.33288800 |
| C           | -2.73508400 | 3.34602900  | -1.31968600 | C  | 4.40668600  | -3.52957500 | -3.12535900 |
| C           | -3.17813600 | 3.28728200  | 1.04157900  | H  | 3.99293300  | -5.48022700 | -2.29678700 |
| C           | -3.34346400 | 4.60043400  | -1.39607700 | H  | 4.56718100  | -1.47761700 | -2.77046600 |
| H           | -2.32259300 | 2.90318800  | -2.21780000 | H  | 5.21533700  | -3.88146200 | -3.76078400 |
| C           | -3.78001700 | 4.54096400  | 0.95912800  | C  | -0.44464300 | -2.86419000 | -1.53752000 |
| H           | -3.12131200 | 2.79291800  | 2.00571700  | C  | -1.02799500 | -4.09723900 | -1.21226500 |
| C           | -3.87428000 | 5.22417200  | -0.26171100 | C  | -0.74186000 | -2.28672800 | -2.78422800 |
| H           | -3.39930900 | 5.10236200  | -2.35951200 | C  | -1.89045500 | -4.73402800 | -2.10999400 |
| H           | -4.18350200 | 4.99652200  | 1.86105500  | H  | -0.80542900 | -4.57515600 | -0.26428900 |
| C           | -4.50075800 | 6.59669100  | -0.34045100 | C  | -1.58744700 | -2.93204000 | -3.68555800 |
| H           | -4.84767700 | 6.82129300  | -1.35453600 | H  | -0.29354300 | -1.33631300 | -3.05753300 |
| H           | -5.35583000 | 6.68781300  | 0.33883700  | C  | -2.16649000 | -4.15870900 | -3.35092000 |
| H           | -3.78183500 | 7.37867500  | -0.06110400 | H  | -2.33405800 | -5.68900500 | -1.83981500 |
| C           | -3.16393400 | -0.32567800 | 1.35555100  | H  | -1.79755500 | -2.47265100 | -4.64764100 |
| C           | -3.16426600 | 0.22106900  | 0.11435300  | H  | -2.82449800 | -4.66351900 | -4.05358600 |
| C           | -1.99776300 | 0.23704100  | 2.09403400  | P  | 2.66421000  | 1.07878300  | 0.55749300  |
| O           | -1.58423400 | -0.01779400 | 3.20497900  | C  | 4.29759400  | 0.74177400  | -0.24357800 |
| C           | -4.11706000 | -1.25978800 | 1.99255600  | C  | 5.20633800  | -0.19744000 | 0.26774300  |
| C           | -5.46279600 | -1.32298500 | 1.58249100  | C  | 4.59414300  | 1.35972800  | -1.47268700 |
| C           | -3.70848800 | -2.08759100 | 3.05608400  | C  | 6.39188300  | -0.48709700 | -0.41191200 |
| C           | -6.35646200 | -2.19935800 | 2.19337900  | H  | 4.99427600  | -0.70371700 | 1.20360300  |
| H           | -5.81547200 | -0.67382500 | 0.78992200  | C  | 5.78422400  | 1.07693300  | -2.14361700 |
| C           | -4.60713100 | -2.96535600 | 3.66252300  | H  | 3.88973800  | 2.05912200  | -1.91089100 |
| H           | -2.69149800 | -2.01690500 | 3.42017500  | C  | 6.69043800  | 0.15512200  | -1.61340600 |
| C           | -5.93260700 | -3.03132800 | 3.23225800  | H  | 7.08315300  | -1.21537400 | 0.00422300  |
| H           | -7.39059700 | -2.22598000 | 1.86000600  | H  | 6.00027800  | 1.57679400  | -3.08447600 |
| H           | -4.26887900 | -3.59448500 | 4.48206800  | H  | 7.61723300  | -0.06485900 | -2.13662300 |
| H           | -6.63146600 | -3.71447300 | 3.70774800  | C  | 2.87751000  | 0.56748100  | 2.32419400  |
| C           | -4.08032100 | -0.08899100 | -1.00999800 | C  | 4.01750200  | 0.90957400  | 3.07361900  |
| C           | -4.08407400 | -1.38280700 | -1.55858900 | C  | 1.80279700  | -0.05296000 | 2.97246900  |
| C           | -4.97603500 | 0.86569400  | -1.52503900 | C  | 4.08860300  | 0.60272500  | 4.43095200  |
| C           | -4.95423700 | -1.71029200 | -2.59769900 | H  | 4.84678700  | 1.42504200  | 2.59764300  |
| H           | -3.40023200 | -2.13016800 | -1.17010500 | C  | 1.86669500  | -0.34263000 | 4.33815500  |
| C           | -5.84973300 | 0.52939600  | -2.55980900 | H  | 0.90022700  | -0.29302900 | 2.42343500  |
| H           | -5.00530300 | 1.86240900  | -1.10153200 | C  | 3.01172600  | -0.02500100 | 5.06637400  |
| C           | -5.84068800 | -0.75696100 | -3.10170400 | H  | 4.97809200  | 0.86700700  | 4.99736600  |
| H           | -4.93368100 | -2.71412000 | -3.01147100 | H  | 1.01261900  | -0.80922600 | 4.81905500  |
| H           | -6.54101000 | 1.27719600  | -2.93929600 | H  | 3.06507500  | -0.25185200 | 6.12822000  |
| H           | -6.52109500 | -1.01484000 | -3.90898300 | C  | 2.65934300  | 2.92123500  | 0.81570000  |
|             |             |             |             | C  | 3.74389400  | 3.76919000  | 0.55631200  |

|             |             |             |             |             |             |             |             |
|-------------|-------------|-------------|-------------|-------------|-------------|-------------|-------------|
| C           | 1.49198200  | 3.47002000  | 1.37528400  | H           | 8.33140000  | -3.64404600 | 0.92393700  |
| C           | 3.65714700  | 5.13691000  | 0.83234300  | H           | 8.54805600  | -3.74777100 | -0.83026800 |
| H           | 4.66312400  | 3.37149000  | 0.13995100  | P           | -2.65986600 | -0.63969800 | 0.16053200  |
| C           | 1.41084900  | 4.83323700  | 1.65659200  | C           | -4.05989800 | -0.15997900 | -0.94489400 |
| H           | 0.64545000  | 2.82621300  | 1.59867900  | C           | -5.36099400 | 0.06747200  | -0.46934800 |
| C           | 2.49239800  | 5.67343500  | 1.38020200  | C           | -3.80673500 | -0.02967100 | -2.31999900 |
| H           | 4.50733000  | 5.78041100  | 0.62017000  | C           | -6.38644800 | 0.41006800  | -1.35253100 |
| H           | 0.49890700  | 5.23760600  | 2.08782900  | H           | -5.57364300 | -0.01769700 | 0.59177000  |
| H           | 2.42767000  | 6.73718400  | 1.59350600  | C           | -4.83520800 | 0.30621900  | -3.20153200 |
| <b>TS13</b> |             |             |             | H           | -2.80058400 | -0.17598300 | -2.69826800 |
| Ni          | -0.62890600 | 0.13522800  | -0.40747000 | C           | -6.12679600 | 0.52753000  | -2.71965800 |
| C           | 1.36085200  | 0.71218100  | 0.84885200  | H           | -7.38841300 | 0.58698800  | -0.97039200 |
| C           | 0.82077800  | 1.23197100  | -0.31369700 | H           | -4.62294700 | 0.40411500  | -4.26274200 |
| C           | 1.32057400  | -0.76215800 | 1.12799500  | H           | -6.92616600 | 0.79667800  | -3.40495100 |
| O           | 0.88967500  | -1.24144500 | 2.15775200  | C           | -3.19854000 | -0.05447600 | 1.82695600  |
| C           | 1.87651300  | 1.52951100  | 1.98632200  | C           | -3.93976100 | -0.85049600 | 2.71256300  |
| C           | 1.23155500  | 2.70078000  | 2.41613700  | C           | -2.85263900 | 1.25058000  | 2.21141700  |
| C           | 3.04207500  | 1.12491600  | 2.66115400  | C           | -4.33260000 | -0.34610500 | 3.95419500  |
| C           | 1.74396900  | 3.45125000  | 3.47293500  | H           | -4.20337400 | -1.86721100 | 2.43740400  |
| H           | 0.32189700  | 3.02048800  | 1.91896100  | C           | -3.25121200 | 1.75483200  | 3.44897700  |
| C           | 3.55540500  | 1.87677200  | 3.71658100  | H           | -2.26133600 | 1.86852600  | 1.54025800  |
| H           | 3.55593200  | 0.21922000  | 2.34980000  | C           | -3.99156600 | 0.95613800  | 4.32345800  |
| C           | 2.90935300  | 3.04482500  | 4.12633500  | H           | -4.90164300 | -0.97446700 | 4.63424000  |
| H           | 1.22680900  | 4.35283200  | 3.79100200  | H           | -2.97299900 | 2.76544100  | 3.73517200  |
| H           | 4.46130500  | 1.54818800  | 4.21910500  | H           | -4.29378200 | 1.34459100  | 5.29229700  |
| H           | 3.30692600  | 3.62968400  | 4.95149600  | C           | -2.77182000 | -2.47972800 | 0.27706000  |
| C           | 0.94699200  | 2.62994700  | -0.76602800 | C           | -3.81342800 | -3.21891500 | -0.30225200 |
| C           | -0.18367000 | 3.36086200  | -1.17217700 | C           | -1.74676700 | -3.15713300 | 0.96203200  |
| C           | 2.20631200  | 3.25539100  | -0.81873500 | C           | -3.83262600 | -4.61208600 | -0.19667000 |
| C           | -0.06235700 | 4.68296700  | -1.59592600 | H           | -4.61019400 | -2.71187600 | -0.83702600 |
| H           | -1.15892200 | 2.88280100  | -1.15006600 | C           | -1.77772600 | -4.54720000 | 1.07139000  |
| C           | 2.32699100  | 4.57330900  | -1.25340100 | H           | -0.92647400 | -2.60531300 | 1.41427200  |
| H           | 3.08677200  | 2.69775100  | -0.51445600 | C           | -2.81734200 | -5.27820500 | 0.49045100  |
| C           | 1.19345000  | 5.29335600  | -1.63986200 | H           | -4.64355000 | -5.17376100 | -0.65310200 |
| H           | -0.94837500 | 5.23540100  | -1.89769100 | H           | -0.98127000 | -5.05817300 | 1.60542400  |
| H           | 3.30774300  | 5.04022100  | -1.28974700 | H           | -2.83326000 | -6.36199100 | 0.57023200  |
| H           | 1.28903100  | 6.32195100  | -1.97731700 | <b>CP24</b> |             |             |             |
| C           | 0.82621900  | -0.12428500 | -1.86608100 | Ni          | -0.69361200 | 0.04885100  | -0.31525600 |
| H           | 0.19897000  | -1.03696600 | -1.79389100 | C           | 1.16869500  | 0.37999700  | -0.79134500 |
| C           | 2.25686900  | -0.50015300 | -1.79149200 | C           | 0.90294700  | 0.75149000  | 0.57642900  |
| H           | 2.91637700  | -0.13880100 | -2.57204400 | C           | 1.59375900  | -1.01222500 | -1.15265100 |
| C           | 0.47730300  | 0.52995700  | -3.18072200 | O           | 1.11763700  | -1.63713300 | -2.07901600 |
| F           | 1.31514500  | 1.53487600  | -3.51124200 | C           | 1.29454900  | 1.34975400  | -1.92971800 |
| F           | 0.53558700  | -0.36778700 | -4.20085200 | C           | 0.37938100  | 2.39961900  | -2.12871500 |
| F           | -0.78345500 | 1.03510700  | -3.19480900 | C           | 2.35707900  | 1.22809700  | -2.84353700 |
| C           | 2.75453700  | -1.23739000 | -0.78621100 | C           | 0.52295300  | 3.28988700  | -3.19202800 |
| O           | 1.87933600  | -1.65462300 | 0.22198500  | H           | -0.45116600 | 2.51653200  | -1.44050200 |
| C           | 4.13495100  | -1.71036400 | -0.60653200 | C           | 2.50054900  | 2.11638900  | -3.90840900 |
| C           | 5.12824800  | -1.49672200 | -1.58340200 | H           | 3.08528500  | 0.43101400  | -2.71930000 |
| C           | 4.50367800  | -2.39964100 | 0.56106500  | C           | 1.58364800  | 3.15324000  | -4.08913600 |
| C           | 6.42979000  | -1.93780700 | -1.38657500 | H           | -0.20153100 | 4.08993500  | -3.32077800 |
| H           | 4.88209400  | -0.98615400 | -2.50966400 | H           | 3.33370800  | 1.99725100  | -4.59625200 |
| C           | 5.81428500  | -2.84049800 | 0.74708700  | H           | 1.69343800  | 3.84519100  | -4.91986600 |
| H           | 3.75460400  | -2.59963300 | 1.31923900  | C           | 0.94367700  | 2.19901000  | 0.99431900  |
| C           | 6.80352400  | -2.61827200 | -0.21535900 | C           | 2.11914700  | 2.94839600  | 0.81851500  |
| H           | 7.17347700  | -1.75601800 | -2.15973400 | C           | -0.16105600 | 2.82689800  | 1.58937100  |
| H           | 6.06851700  | -3.37163400 | 1.66162900  | C           | 2.18750900  | 4.28091100  | 1.22487400  |
| C           | 8.22401000  | -3.09000900 | -0.01397500 | H           | 2.98116700  | 2.48125600  | 0.35160500  |
| H           | 8.92620700  | -2.24677400 | 0.01509500  | C           | -0.09486000 | 4.16139800  | 1.99325700  |

|   |             |             |              |             |             |             |             |
|---|-------------|-------------|--------------|-------------|-------------|-------------|-------------|
| H | -1.07777200 | 2.26493800  | 1.73481700   | H           | -6.92003500 | 0.88483800  | 2.33901100  |
| C | 1.07955500  | 4.89390900  | 1.81340800   | H           | -4.46884500 | 4.00693700  | 0.67649500  |
| H | 3.10711200  | 4.84147400  | 1.07714900   | H           | -6.48575300 | 3.30219400  | 1.95275500  |
| H | -0.96443800 | 4.62740300  | 2.45005900   |             |             |             |             |
| H | 1.13118300  | 5.93316800  | 2.12748000   | <b>CP25</b> |             |             |             |
| C | 1.37978600  | -0.28556200 | 1.63048000   | Ni          | 0.65826600  | 0.02050600  | 0.02890900  |
| H | 0.93298500  | -1.25461800 | 1.37995700   | P           | 1.94995000  | 1.67396100  | -0.86720600 |
| C | 2.87937900  | -0.42428700 | 1.54894100   | C           | 3.57112300  | 1.23399400  | -1.67448800 |
| H | 3.50049800  | 0.05439900  | 2.29589700   | C           | 4.64511600  | 0.86585000  | -0.84463400 |
| C | 0.93514100  | -0.03238300 | 3.06063900   | C           | 3.76793900  | 1.22324700  | -3.06367700 |
| F | 1.22322900  | -1.10622700 | 3.83370700   | C           | 5.87428800  | 0.49531500  | -1.38773600 |
| F | 1.53714200  | 1.03082400  | 3.63042100   | H           | 4.52349800  | 0.87447000  | 0.23354700  |
| F | -0.40531800 | 0.16533700  | 3.15240700   | C           | 4.99971500  | 0.84468900  | -3.60701000 |
| C | 3.42461800  | -1.06574300 | 0.50550000   | H           | 2.96451000  | 1.51718600  | -3.73005800 |
| O | 2.59601400  | -1.66146600 | -0.44476000  | C           | 6.05573000  | 0.47891200  | -2.77307700 |
| C | 4.85712300  | -1.29732600 | 0.23881200   | H           | 6.68823400  | 0.21479900  | -0.72472300 |
| C | 5.84942500  | -0.93177800 | 1.16807500   | H           | 5.13106700  | 0.84646300  | -4.68621600 |
| C | 5.26970900  | -1.89606700 | -0.96183400  | H           | 7.01279600  | 0.18626100  | -3.19684200 |
| C | 7.19473600  | -1.14188600 | 0.89390300   | C           | 2.46440000  | 3.14588000  | 0.13002500  |
| H | 5.57039100  | -0.48771300 | 2.11876600   | C           | 3.43921500  | 4.05329300  | -0.32006700 |
| C | 6.62313800  | -2.10600100 | -1.22601300  | C           | 1.86756400  | 3.36038600  | 1.37954000  |
| H | 4.52400100  | -2.20828100 | -1.68407900  | C           | 3.79927700  | 5.15112600  | 0.46115800  |
| C | 7.61172200  | -1.73085200 | -0.311108200 | H           | 3.92056500  | 3.89866200  | -1.28115000 |
| H | 7.93870300  | -0.85006400 | 1.63206100   | C           | 2.22740500  | 4.46144500  | 2.16076100  |
| H | 6.91278100  | -2.57424800 | -2.16396300  | H           | 1.11359600  | 2.67032000  | 1.74084500  |
| C | 9.07855700  | -1.94041300 | -0.60327800  | C           | 3.19381600  | 5.35762300  | 1.70412400  |
| H | 9.59441200  | -2.40510200 | 0.24547700   | H           | 4.55410700  | 5.84497400  | 0.10016800  |
| H | 9.22432100  | -2.58171300 | -1.47828400  | H           | 1.74836100  | 4.61229600  | 3.12446900  |
| H | 9.58558500  | -0.98722400 | -0.80393500  | H           | 3.47733300  | 6.21287500  | 2.31214900  |
| P | -2.82782500 | -0.58143300 | -0.16110400  | C           | 0.98728200  | 2.38386600  | -2.28068800 |
| C | -3.16135700 | -2.14582600 | 0.75983200   | C           | 0.74520100  | 3.75367800  | -2.44121500 |
| C | -4.00807800 | -3.15153900 | 0.27083800   | C           | 0.43009300  | 1.48735500  | -3.21049800 |
| C | -2.52516700 | -2.33142100 | 1.99894800   | C           | -0.03008700 | 4.21716800  | -3.50715500 |
| C | -4.21903800 | -4.31759800 | 1.01057500   | H           | 1.14868200  | 4.46507500  | -1.72884000 |
| H | -4.49889400 | -3.02970400 | -0.68970600  | C           | -0.33053100 | 1.95286800  | -4.28306300 |
| C | -2.74531300 | -3.49324800 | 2.73837800   | H           | 0.58412600  | 0.41796300  | -3.09027600 |
| H | -1.85746000 | -1.56718900 | 2.38481700   | C           | -0.56567800 | 3.32214200  | -4.43220700 |
| C | -3.59094900 | -4.48988700 | 2.24486900   | H           | -0.21981600 | 5.28241400  | -3.60722800 |
| H | -4.87322100 | -5.09170800 | 0.61820300   | H           | -0.74864300 | 1.24490500  | -4.99415800 |
| H | -2.24753400 | -3.62348200 | 3.69548200   | H           | -1.17101700 | 3.68573100  | -5.25796900 |
| H | -3.75397900 | -5.39910400 | 2.81729000   | P           | 1.86542300  | -1.81897800 | 0.58438000  |
| C | -3.44329600 | -0.90508600 | -1.87002800  | C           | 3.35582100  | -1.35465900 | 1.58550300  |
| C | -4.76831500 | -0.66561200 | -2.26492700  | C           | 4.58774300  | -2.01841000 | 1.49685900  |
| C | -2.52533600 | -1.40281000 | -2.81187100  | C           | 3.23729700  | -0.26652800 | 2.46774900  |
| C | -5.17062200 | -0.92793600 | -3.57603600  | C           | 5.67607600  | -1.60083700 | 2.26711700  |
| H | -5.48504100 | -0.26898400 | -1.55199700  | H           | 4.70361700  | -2.85861600 | 0.82003400  |
| C | -2.93424200 | -1.66692600 | -4.11976500  | C           | 4.32229400  | 0.14413900  | 3.24375200  |
| H | -1.48824700 | -1.57709200 | -2.53175900  | H           | 2.29201400  | 0.26447300  | 2.54399400  |
| C | -4.25579500 | -1.42984000 | -4.50400200  | C           | 5.54755800  | -0.51978700 | 3.14125100  |
| H | -6.19875800 | -0.73631200 | -3.87192900  | H           | 6.62556100  | -2.12340400 | 2.18237600  |
| H | -2.21422800 | -2.04840200 | -4.83829200  | H           | 4.21187800  | 0.98893400  | 3.91833500  |
| H | -4.57051700 | -1.62880000 | -5.52501800  | H           | 6.39614000  | -0.19522800 | 3.73767500  |
| C | -4.02841000 | 0.62508600  | 0.54976500   | C           | 2.54225400  | -2.97341800 | -0.69306700 |
| C | -5.16511100 | 0.23658300  | 1.27448300   | C           | 2.75780500  | -4.34099300 | -0.45636300 |
| C | -3.78547300 | 1.99335000  | 0.34689600   | C           | 2.87369300  | -2.44528900 | -1.94992200 |
| C | -6.04491000 | 1.19853300  | 1.77612200   | C           | 3.29453800  | -5.15677500 | -1.45411100 |
| H | -5.36179200 | -0.81620400 | 1.45292500   | H           | 2.50177000  | -4.77215500 | 0.50637200  |
| C | -4.66951900 | 2.95186200  | 0.84209000   | C           | 3.41816400  | -3.25975500 | -2.94351700 |
| H | -2.89562900 | 2.30469500  | -0.19348300  | H           | 2.70709800  | -1.39231500 | -2.14974500 |
| C | -5.80108600 | 2.55580300  | 1.55905800   | C           | 3.62741700  | -4.61801000 | -2.69885800 |

|   |             |             |             |             |             |             |             |
|---|-------------|-------------|-------------|-------------|-------------|-------------|-------------|
| H | 3.45188500  | -6.21416400 | -1.25745900 | C           | -1.13590300 | 2.31941000  | 6.17731500  |
| H | 3.67251100  | -2.83089800 | -3.90897000 | H           | -0.27872400 | 1.89872400  | 6.71620000  |
| H | 4.04373500  | -5.25512600 | -3.47479300 | H           | -1.12035800 | 3.40576600  | 6.31504100  |
| C | 0.98477500  | -2.98036900 | 1.73713900  | H           | -2.04154400 | 1.94083700  | 6.67072200  |
| C | 1.34665000  | -3.14341900 | 3.08341700  |             |             |             |             |
| C | -0.13190300 | -3.68536500 | 1.25374600  | <b>CP26</b> |             |             |             |
| C | 0.61070600  | -3.98516000 | 3.92245700  | C           | -0.00814800 | 1.93315400  | 0.76931000  |
| H | 2.20701700  | -2.61768700 | 3.48341700  | C           | -1.11438800 | 1.34058000  | 1.53457100  |
| C | -0.86017600 | -4.53050200 | 2.09091200  | C           | 0.08506600  | 1.82064000  | 2.19979100  |
| H | -0.43248700 | -3.58055300 | 0.21783800  | O           | 0.65388700  | 2.10769700  | 3.23738500  |
| C | -0.49370100 | -4.68091800 | 3.43070000  | C           | 0.24885600  | 2.95367600  | -0.25176600 |
| H | 0.90949300  | -4.09906400 | 4.96145700  | C           | -0.55959500 | 3.09271600  | -1.39467400 |
| H | -1.71840700 | -5.06637000 | 1.69421800  | C           | 1.32214200  | 3.84514700  | -0.07229000 |
| H | -1.06415100 | -5.33555600 | 4.08423300  | C           | -0.30933600 | 4.09921700  | -2.32534000 |
| C | -3.82120100 | 0.89521500  | -0.66462400 | H           | -1.38611700 | 2.40479900  | -1.55144100 |
| C | -3.44909400 | -0.37214300 | -0.97681900 | C           | 1.56968500  | 4.85084900  | -1.00558000 |
| C | -2.86065400 | 2.05345300  | -0.74157100 | H           | 1.94941000  | 3.74248900  | 0.80758600  |
| O | -3.18996200 | 3.13056900  | -1.18464700 | C           | 0.75622200  | 4.98277200  | -2.13357100 |
| C | -5.20824600 | 1.29923300  | -0.28719000 | H           | -0.94659100 | 4.19548800  | -3.20058100 |
| C | -6.30987600 | 1.01568400  | -1.10693900 | H           | 2.39972600  | 5.53478100  | -0.84983600 |
| C | -5.42527000 | 2.00146300  | 0.90970000  | H           | 0.95063900  | 5.76831100  | -2.85885000 |
| C | -7.59525200 | 1.40803700  | -0.73313700 | C           | -2.55716100 | 1.50159200  | 1.75858000  |
| H | -6.15619500 | 0.49206200  | -2.04473500 | C           | -3.12636300 | 0.97157100  | 2.93295200  |
| C | -6.71022900 | 2.38927300  | 1.28572400  | C           | -3.38640600 | 2.20627100  | 0.86904000  |
| H | -4.58044200 | 2.23886200  | 1.55158900  | C           | -4.48491700 | 1.13536900  | 3.20096700  |
| C | -7.80113900 | 2.09262700  | 0.46562000  | H           | -2.48974800 | 0.43642000  | 3.63018600  |
| H | -8.43603300 | 1.18227200  | -1.38392000 | C           | -4.74255300 | 2.37729700  | 1.14582500  |
| H | -6.85872100 | 2.92591300  | 2.21918400  | H           | -2.96135800 | 2.64034700  | -0.02943400 |
| H | -8.80290300 | 2.39814400  | 0.75618800  | C           | -5.29912400 | 1.83927500  | 2.30874500  |
| C | -4.39718600 | -1.52128000 | -0.82370500 | H           | -4.90610300 | 0.72218600  | 4.11376500  |
| C | -4.76682300 | -1.93133900 | 0.46749400  | H           | -5.36546300 | 2.93422200  | 0.45070400  |
| C | -4.93227500 | -2.20693700 | -1.92522200 | H           | -6.35597300 | 1.97453300  | 2.52297100  |
| C | -5.64160600 | -3.00225900 | 0.65252100  | C           | -0.28754700 | -2.02031800 | 1.23873300  |
| H | -4.37081600 | -1.39804600 | 1.32663600  | H           | 0.28271800  | -2.69489000 | 0.61112600  |
| C | -5.81533000 | -3.27054000 | -1.73865000 | C           | -1.51894200 | -1.54410300 | 0.78595400  |
| H | -4.65974600 | -1.90481600 | -2.93050200 | H           | -2.27319000 | -1.22763800 | 1.49365300  |
| C | -6.17024900 | -3.67488700 | -0.45030400 | C           | 0.02056600  | -2.16796700 | 2.69717500  |
| H | -5.91507500 | -3.30444400 | 1.66007500  | F           | -0.75733800 | -1.39610300 | 3.49048800  |
| H | -6.22688800 | -3.78351500 | -2.60397900 | F           | -0.14906100 | -3.44872600 | 3.10408800  |
| H | -6.85617400 | -4.50569700 | -0.30756100 | F           | 1.31013700  | -1.84424600 | 2.96774000  |
| C | -1.96254700 | -0.62047800 | -1.27634200 | C           | -1.90419100 | -1.81785400 | -0.62947100 |
| H | -1.60426500 | 0.17870000  | -1.93014400 | O           | -1.06272900 | -2.24218800 | -1.42698900 |
| C | -1.23603300 | -0.50296600 | 0.06626700  | C           | -3.31237100 | -1.59508200 | -1.07847000 |
| H | -1.50965700 | -1.27047900 | 0.79035700  | C           | -4.33886200 | -1.12353800 | -0.24614300 |
| C | -1.62590200 | -1.87617000 | -2.05563300 | C           | -3.62356600 | -1.90097200 | -2.41671600 |
| F | -0.29602500 | -1.92845500 | -2.32673200 | C           | -5.63314400 | -0.96553300 | -0.74131200 |
| F | -1.93629200 | -3.02782300 | -1.42000900 | H           | -4.14779600 | -0.86317500 | 0.78836500  |
| F | -2.25471000 | -1.89879000 | -3.25734800 | C           | -4.91427700 | -1.74270800 | -2.90109000 |
| C | -1.10464600 | 0.84526200  | 0.51625800  | H           | -2.82714300 | -2.26637200 | -3.05638000 |
| O | -1.56304200 | 1.90591200  | -0.32167100 | C           | -5.94667900 | -1.27443700 | -2.06975400 |
| C | -1.10729800 | 1.22032400  | 1.95095900  | H           | -6.40966100 | -0.59020500 | -0.07978800 |
| C | -0.76498500 | 0.29019000  | 2.95608200  | H           | -5.13239900 | -1.98527500 | -3.93896300 |
| C | -1.44955500 | 2.52186700  | 2.36536500  | C           | -7.35401300 | -1.12855300 | -2.59631300 |
| C | -0.76552100 | 0.65140900  | 4.30018900  | H           | -7.36486500 | -0.64992300 | -3.58242300 |
| H | -0.49749300 | -0.72599800 | 2.68685800  | H           | -7.83588700 | -2.10869900 | -2.71012400 |
| C | -1.44852500 | 2.87039600  | 3.71699500  | H           | -7.97579500 | -0.53204700 | -1.92146600 |
| H | -1.70602600 | 3.26728900  | 1.62066100  | Ni          |             | -0.05014600 | -0.09298300 |
| C | -1.10849100 | 1.94781100  | 4.71315000  | 0.67156700  |             |             |             |
| H | -0.49674000 | -0.09506700 | 5.04528100  | P           | 2.01812200  | -0.43444300 | -0.34951200 |
| H | -1.72229500 | 3.88507500  | 3.99945400  | C           | 2.82828300  | -2.08739100 | -0.13882800 |

|             |             |             |             |   |             |             |             |
|-------------|-------------|-------------|-------------|---|-------------|-------------|-------------|
| C           | 3.94318100  | -2.28560000 | 0.68685500  | H | 5.39599500  | -1.62461900 | -4.17997600 |
| C           | 2.27154600  | -3.19311100 | -0.80864200 | C | -0.39677100 | -2.36448600 | 0.28218800  |
| C           | 4.49460300  | -3.56074100 | 0.83682500  | H | -0.91817200 | -2.40423200 | 1.23064600  |
| H           | 4.38950700  | -1.44749200 | 1.21150100  | C | 0.95285600  | -2.00770100 | 0.26427800  |
| C           | 2.82644900  | -4.46366100 | -0.65518900 | H | 1.58820400  | -2.34230300 | -0.54421200 |
| H           | 1.40031100  | -3.06019600 | -1.44436700 | C | -0.96143400 | -3.30211500 | -0.73659700 |
| C           | 3.93989100  | -4.65158000 | 0.16765500  | F | -0.47380600 | -3.08986000 | -1.98922300 |
| H           | 5.36116500  | -3.69655800 | 1.47849600  | F | -0.68799200 | -4.59500300 | -0.43407900 |
| H           | 2.38585500  | -5.30743200 | -1.17960900 | F | -2.30796600 | -3.20187700 | -0.81744300 |
| H           | 4.37037200  | -5.64226200 | 0.28657500  | C | 1.58276800  | -1.49998300 | 1.51683500  |
| C           | 3.28603500  | 0.75523200  | 0.27257900  | O | 0.88508500  | -1.14229000 | 2.46906400  |
| C           | 4.18548900  | 1.43957500  | -0.55797000 | C | 3.07372400  | -1.42492300 | 1.62271500  |
| C           | 3.32287700  | 0.99419700  | 1.65719900  | C | 3.95794100  | -2.00370700 | 0.69969100  |
| C           | 5.11116500  | 2.33190600  | -0.01302100 | C | 3.61427900  | -0.76076500 | 2.73895600  |
| H           | 4.16041900  | 1.29053600  | -1.63193200 | C | 5.33666500  | -1.91974100 | 0.89114700  |
| C           | 4.25232400  | 1.88286200  | 2.19888100  | H | 3.58786900  | -2.52512700 | -0.17587100 |
| H           | 2.61580400  | 0.50303400  | 2.31741700  | C | 4.98865300  | -0.67224500 | 2.91776900  |
| C           | 5.14993700  | 2.55299100  | 1.36480000  | H | 2.92818800  | -0.32128500 | 3.45526600  |
| H           | 5.79876200  | 2.85809500  | -0.67008600 | C | 5.87710200  | -1.25594700 | 1.99885900  |
| H           | 4.25609100  | 2.06172000  | 3.27005600  | H | 6.00261100  | -2.37457400 | 0.16205600  |
| H           | 5.86862800  | 3.25129700  | 1.78560400  | H | 5.38492200  | -0.14656800 | 3.78384500  |
| C           | 2.02072800  | -0.27069600 | -2.18657200 | C | 7.36960500  | -1.18666600 | 2.21648100  |
| C           | 3.12594900  | -0.67208400 | -2.95790600 | H | 7.67196000  | -0.21187900 | 2.61285200  |
| C           | 0.88885600  | 0.23342500  | -2.83889400 | H | 7.69732100  | -1.94409900 | 2.94116300  |
| C           | 3.10400000  | -0.54498700 | -4.34615900 | H | 7.92024300  | -1.36292800 | 1.28698100  |
| H           | 3.99921500  | -1.09726400 | -2.47220100 | P | -2.35356000 | 0.13149000  | 0.24267900  |
| C           | 0.86662800  | 0.35849300  | -4.22945400 | C | -2.47183200 | 1.83735200  | 0.97942300  |
| H           | 0.01893800  | 0.51802100  | -2.25930900 | C | -2.31358600 | 2.04422200  | 2.35882100  |
| C           | 1.97418400  | -0.02604700 | -4.98459300 | C | -2.66903600 | 2.95623500  | 0.15113000  |
| H           | 3.96556600  | -0.85835700 | -4.92972600 | C | -2.35411100 | 3.33138800  | 2.89705600  |
| H           | -0.02028000 | 0.75023700  | -4.71985200 | H | -2.16894000 | 1.20453200  | 3.02805300  |
| H           | 1.95611500  | 0.06795500  | -6.06716600 | C | -2.71489200 | 4.24050300  | 0.69561100  |
| <b>TS14</b> |             |             |             | H | -2.76686800 | 2.82836100  | -0.91939400 |
| Ni          | -0.22779600 | -0.44714600 | -0.41980500 | C | -2.55728800 | 4.43492500  | 2.06837800  |
| C           | 1.09661900  | 1.66298900  | -0.80323200 | H | -2.23163400 | 3.46571800  | 3.96856000  |
| C           | 1.33671100  | 0.36791100  | -1.26752000 | H | -2.87330900 | 5.09132300  | 0.03796500  |
| C           | -0.15399800 | 1.32813800  | -1.37624200 | H | -2.59256600 | 5.43669600  | 2.48835800  |
| O           | -0.97658900 | 1.83329000  | -2.13336500 | C | -3.16541700 | -0.92013400 | 1.53761700  |
| C           | 1.78959500  | 2.90620800  | -0.48179200 | C | -4.47134600 | -1.41458100 | 1.40501200  |
| C           | 2.92769400  | 2.92519300  | 0.34521900  | C | -2.43639500 | -1.24804700 | 2.69650300  |
| C           | 1.26677800  | 4.12391900  | -0.95880800 | C | -5.04228300 | -2.19458400 | 2.41322700  |
| C           | 3.54491900  | 4.13363300  | 0.66368400  | H | -5.04927900 | -1.19982200 | 0.51365200  |
| H           | 3.30588800  | 1.99249900  | 0.75545200  | C | -3.01480100 | -2.02060700 | 3.70543600  |
| C           | 1.89645800  | 5.32617000  | -0.64611500 | H | -1.40257500 | -0.93018600 | 2.80159800  |
| H           | 0.37633400  | 4.10392900  | -1.57934900 | C | -4.32070800 | -2.49422700 | 3.56885000  |
| C           | 3.03656800  | 5.33530400  | 0.16305100  | H | -6.05502000 | -2.56917600 | 2.28933000  |
| H           | 4.42039900  | 4.13879600  | 1.30758700  | H | -2.43416400 | -2.26121500 | 4.59196800  |
| H           | 1.49526900  | 6.26015700  | -1.03054600 | H | -4.76791700 | -3.10116700 | 4.35156000  |
| H           | 3.52157500  | 6.27594100  | 0.41001900  | C | -3.54579000 | 0.16055700  | -1.15687000 |
| C           | 2.48199100  | -0.17880000 | -2.01312900 | C | -4.79588200 | 0.79534400  | -1.06396400 |
| C           | 2.28693900  | -1.31053200 | -2.82964700 | C | -3.19547000 | -0.48006000 | -2.35330300 |
| C           | 3.75474900  | 0.42652700  | -2.01121100 | C | -5.68122900 | 0.77375300  | -2.14184600 |
| C           | 3.32548200  | -1.82771800 | -3.60190600 | H | -5.07614900 | 1.31393500  | -0.15175200 |
| H           | 1.30576600  | -1.77176500 | -2.85440100 | C | -4.08373300 | -0.50285800 | -3.42928000 |
| C           | 4.79196700  | -0.09282900 | -2.78335800 | H | -2.22368500 | -0.95269000 | -2.44649100 |
| H           | 3.93036600  | 1.30766700  | -1.40558400 | C | -5.32691000 | 0.12211300  | -3.32566700 |
| C           | 4.58475000  | -1.22298800 | -3.57853200 | H | -6.64510100 | 1.26870400  | -2.05751500 |
| H           | 3.14938100  | -2.69922000 | -4.22691200 | H | -3.79719100 | -1.00015100 | -4.35176200 |
| H           | 5.76627000  | 0.38868400  | -2.76503900 | H | -6.01583100 | 0.10858800  | -4.16616900 |

## 8. References

- (1). (a) Qi, X.-X.; Chen, C.-H.; Hou, C. -Q.; Fu, L.; Chen, P. -H.; Liu, G. -S. *J. Am. Chem. Soc.*, **2018**, *140*, 7415–7419. (b) Du, W.; Gu, Q. -S; Li, Y.; Lin, Z. -Y.; Yang, D. *Org. Lett.* **2017**, *19*, 316–319.
- (2). (a) Cai, S.-T.; Zeng, J.; Li, Y. -X.; Liu, X.-W. *RSC Adv.* **2014**, *4*, 7275-7278. (b) Brendan. D.; Kelly, B. D.; Lambert, T. *H. Org. Lett.*, **2011**, *13*, 740–743.
- (3). Sanz-Marco, A.; Blay, G.; Muñoz, M. C.; Pedro, J. R. *Chem. Commun.* **2015**, *51*, 8958-8961
- (4). (a) Becke, A. D. Density-functional thermochemistry. III. The role of exact exchange. *J. Chem. Phys.* **1993**, *98*, 5648–5652. (b) Lee, C.; Yang, W.; Parr, R. G. Development of the Colle-Salvetti correlation-energy formula into a functional of the electron density. *Phys. Rev. B: Condens. Matter Mater. Phys.* **1988**, *37*, 785–789.
- (5). (a) Hay, P. J.; Wadt, W. R. *Ab initio* effective core potentials for molecular calculations. Potentials for K to Au including the outermost core orbitals. *J. Chem. Phys.* **1985**, *82*, 299–310. (b) Hay, P. J.; Wadt, W. R. *Ab initio* effective core potentials for molecular calculations. Potentials for the transition metal atoms Sc to Hg. *J. Chem. Phys.* **1985**, *82*, 284–298. (c) Roy, L. E.; Hay, P. J.; Martin, R. L. Revised basis sets for the LANL effective core potentials. *J. Chem. Theory Comput.*, 2008, **4**, 1029–1031.
- (6). (a) Cossi, M.; Barone, V.; Cammi, R.; Tomasi, J. *Ab initio* study of solvated molecules: a new implementation of the polarizable continuum model. *Chem. Phys. Lett.* **1996**, *255*, 327–335. (b) Cancès, E.; Mennucci, B.; Tomasi, J. A new integral equation formalism for the polarizable continuum model: Theoretical background and applications to isotropic and anisotropic dielectrics. *J. Chem. Phys.* **1997**, *107*, 3032–3041. (c) Barone, V.; Cossi, M.; Tomasi, J. Geometry optimization of molecular structures in solution by the polarizable continuum model. *J. Comput. Chem.* **1998**, *19*, 404–417. (d) Marenich, A. V.; Cramer, C. J.; Truhlar, D. G. Universal Solvation Model Based on Solute Electron Density and on a Continuum Model of the Solvent Defined by the Bulk Dielectric Constant and Atomic Surface Tensions. *J. Phys. Chem. B* **2009**, *113*, 6378–6396.
- (7). (a) Zhao, Y.; Truhlar, D. G. The M06 suite of density functionals for main group thermochemistry, thermochemical kinetics, noncovalent interactions, excited states, and transition elements: two new functionals and systematic testing of four M06-class functionals and 12 other functionals. *Theor. Chem. Acc.* **2008**, *120*, 215–241.
- (8). Legault, C. Y.; CYLView, 1.0b; Université de Sherbrooke, Canada, **2009**. <http://www.cylview.org> (Date of access: 1/10/2017).

# 9. NMR Spectra

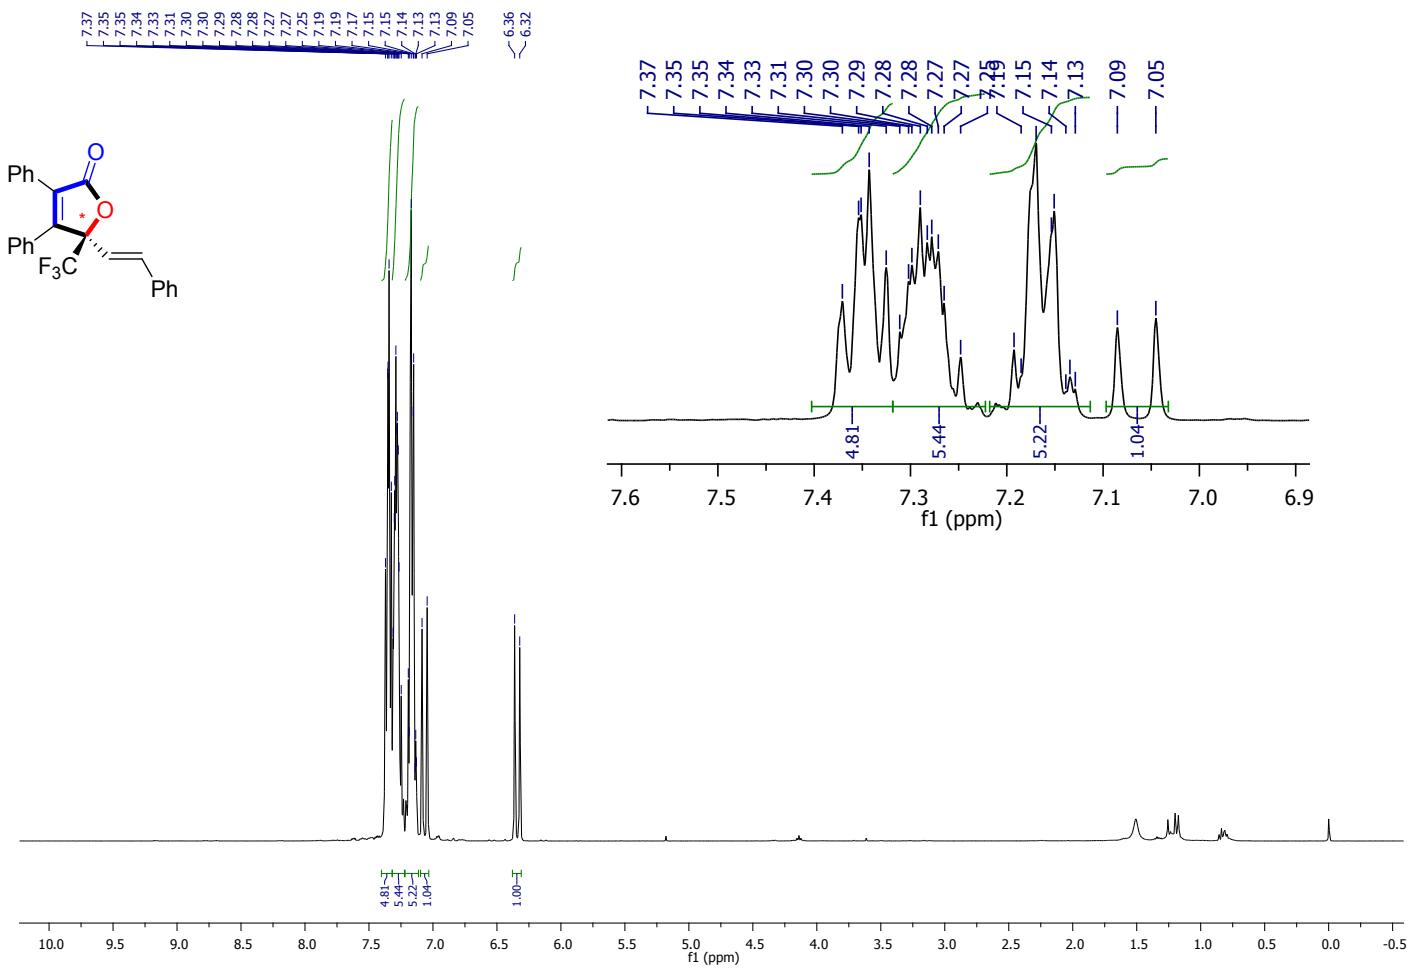

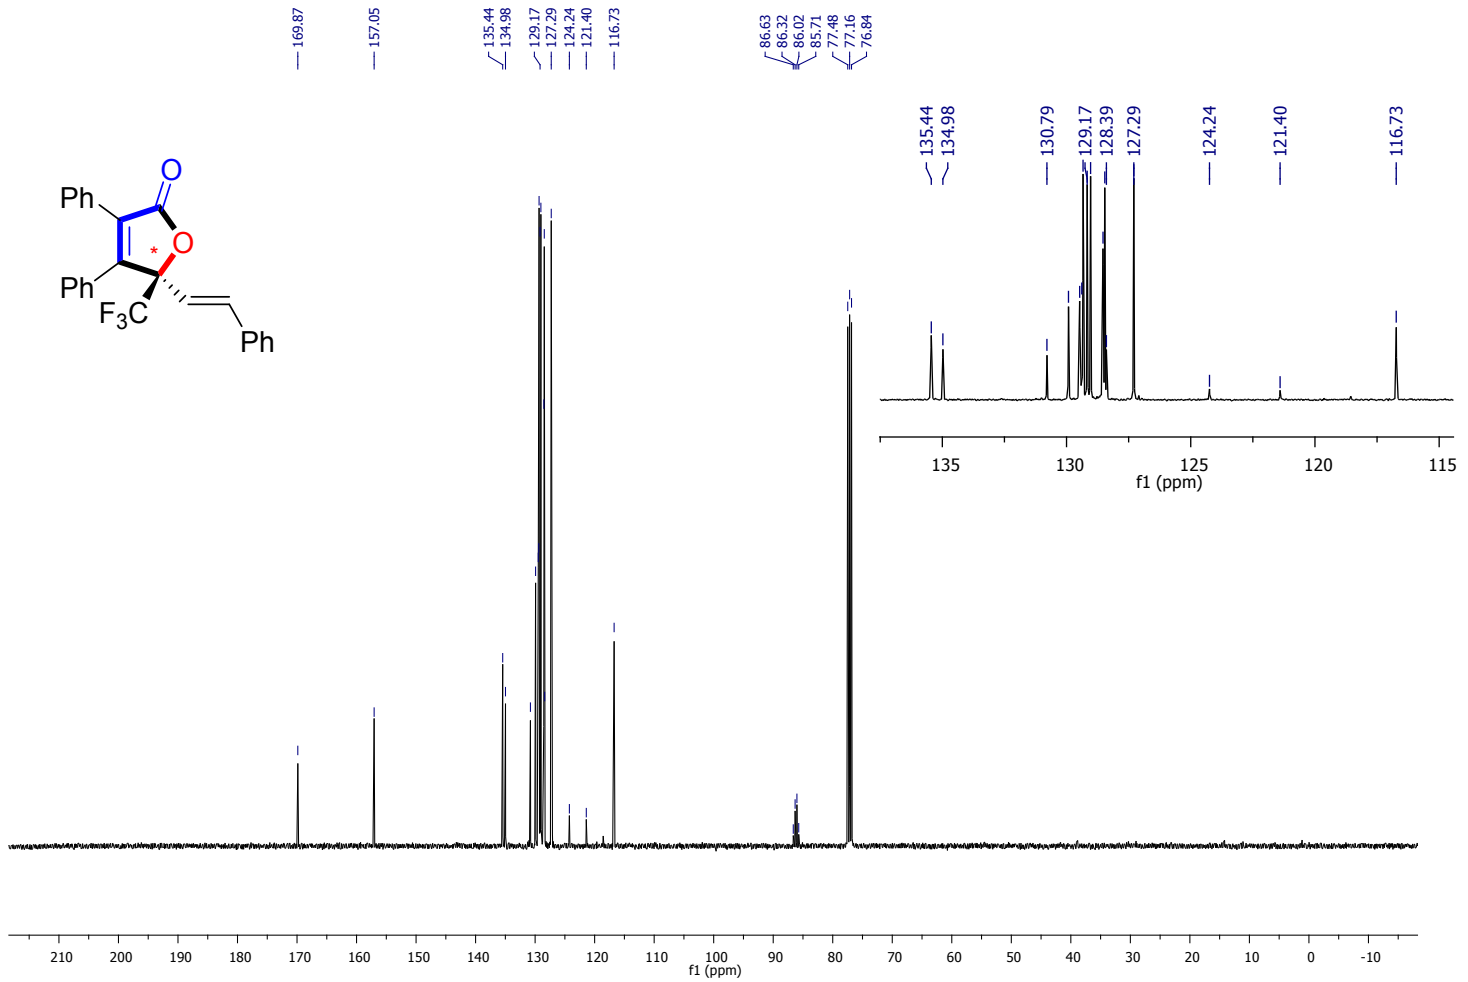



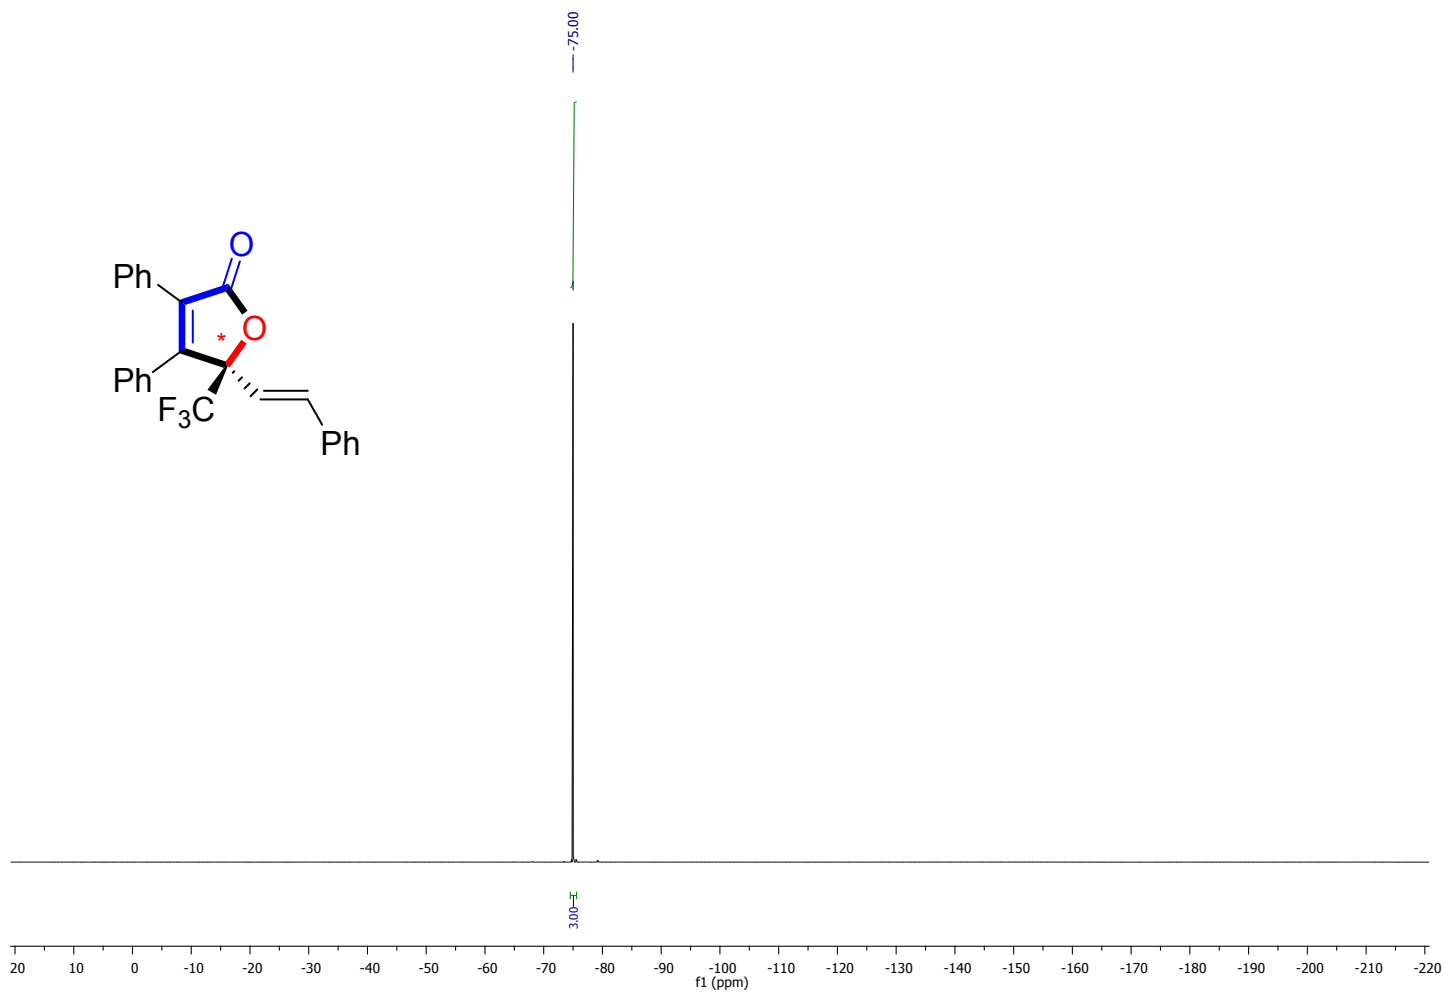

S81

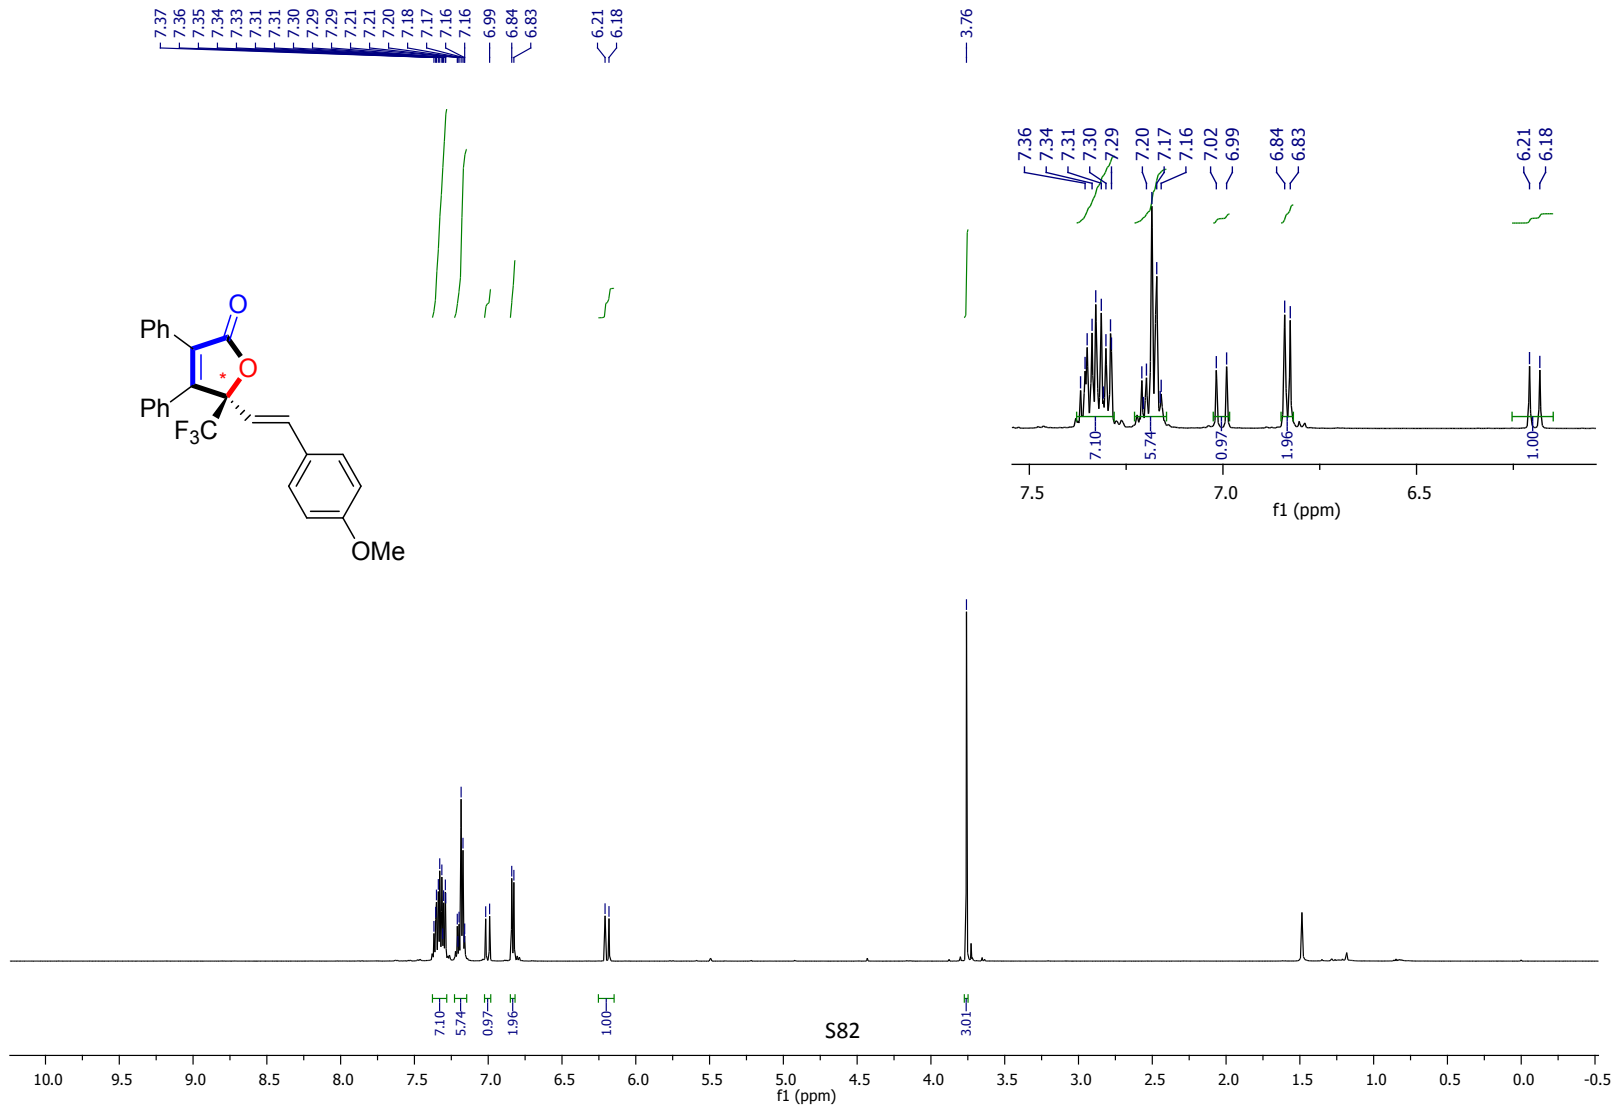

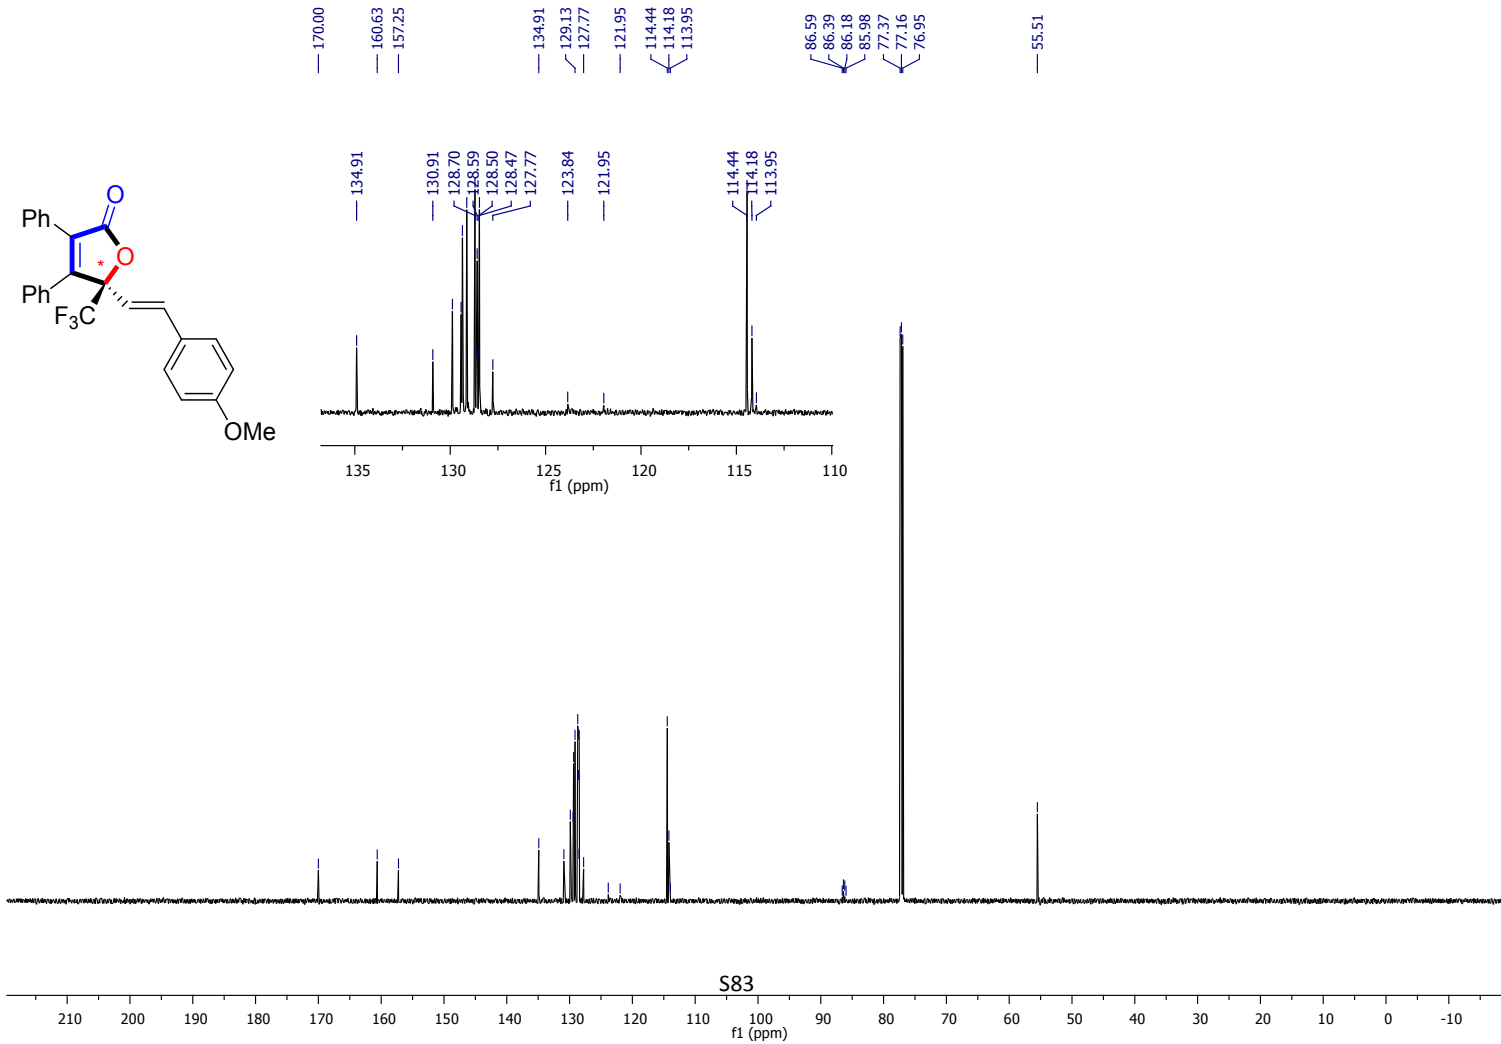

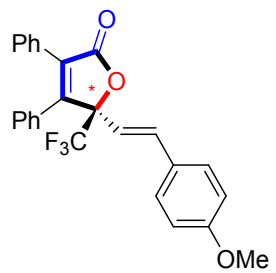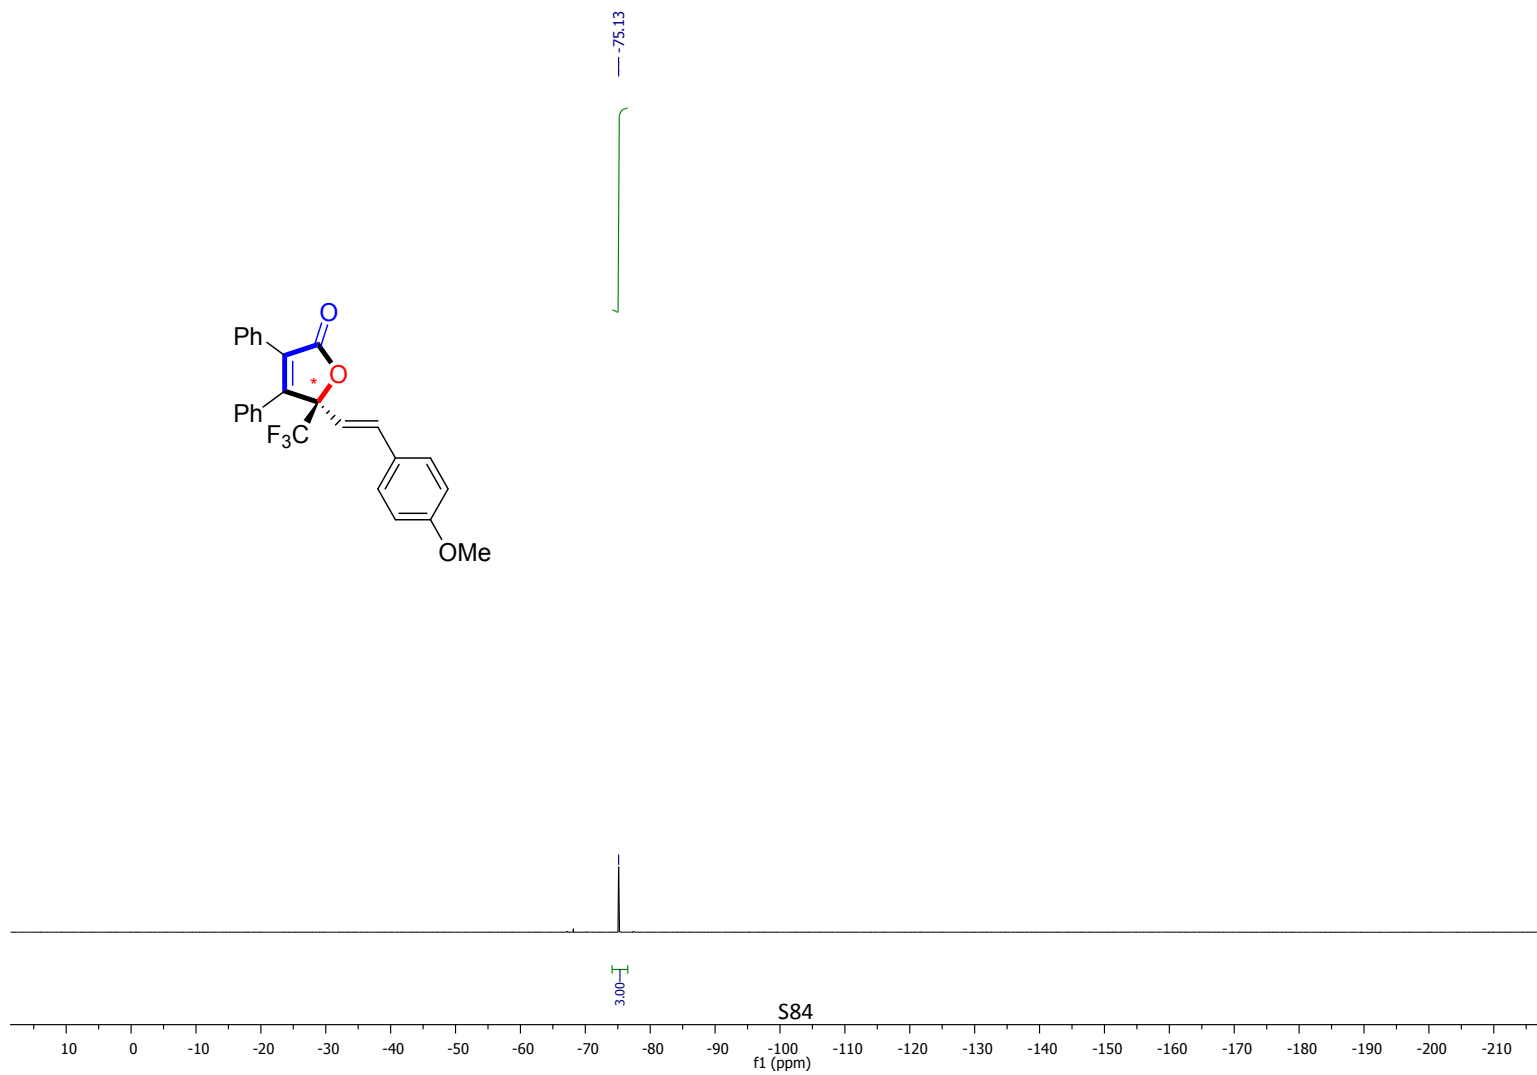

7.57  
7.55  
7.48  
7.46  
7.39  
7.38  
7.37  
7.36  
7.34  
7.31  
7.30  
7.29  
7.29  
7.22  
7.21  
7.21  
7.20  
7.20  
7.19  
7.19  
7.18  
7.17  
7.17  
7.15  
7.15  
7.14  
7.10  
6.45  
6.41

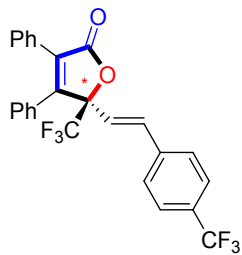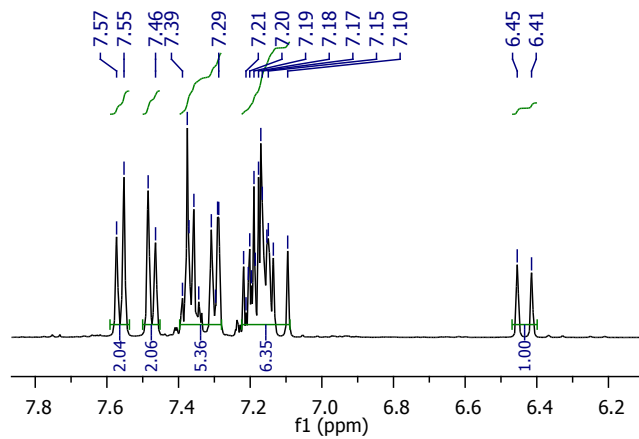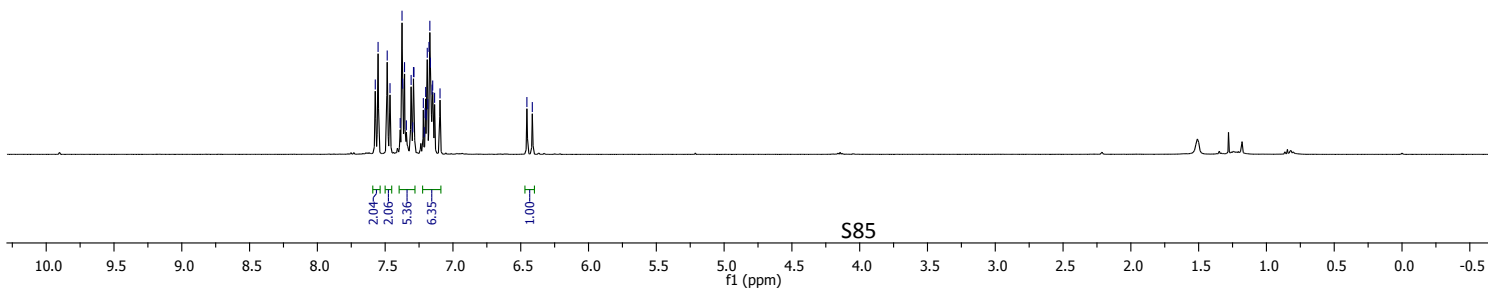

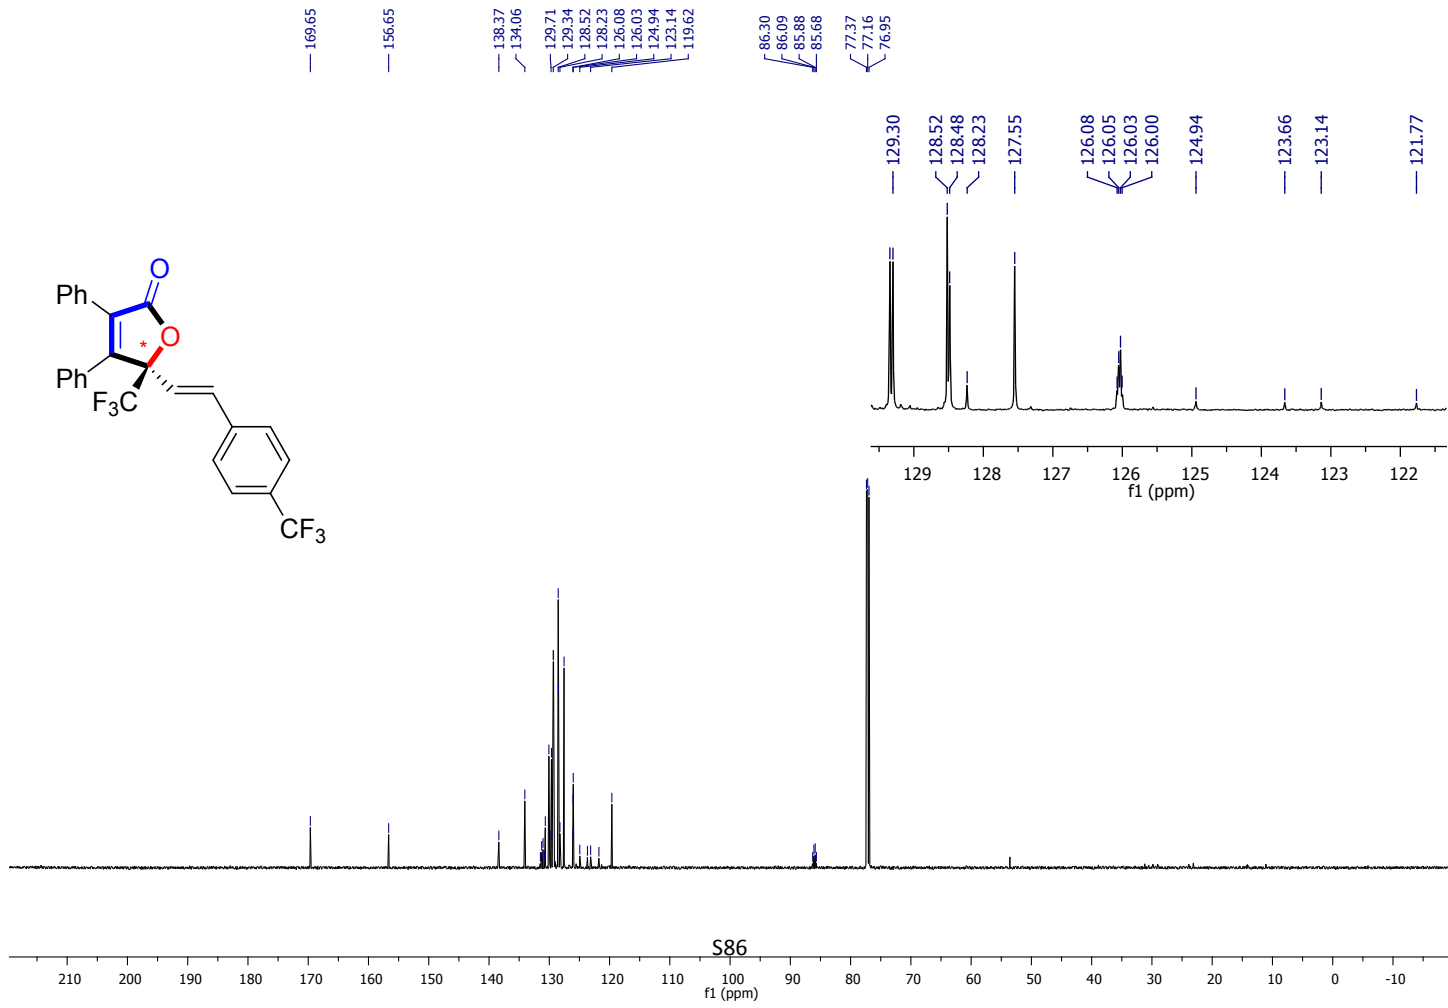

S86

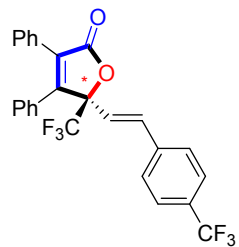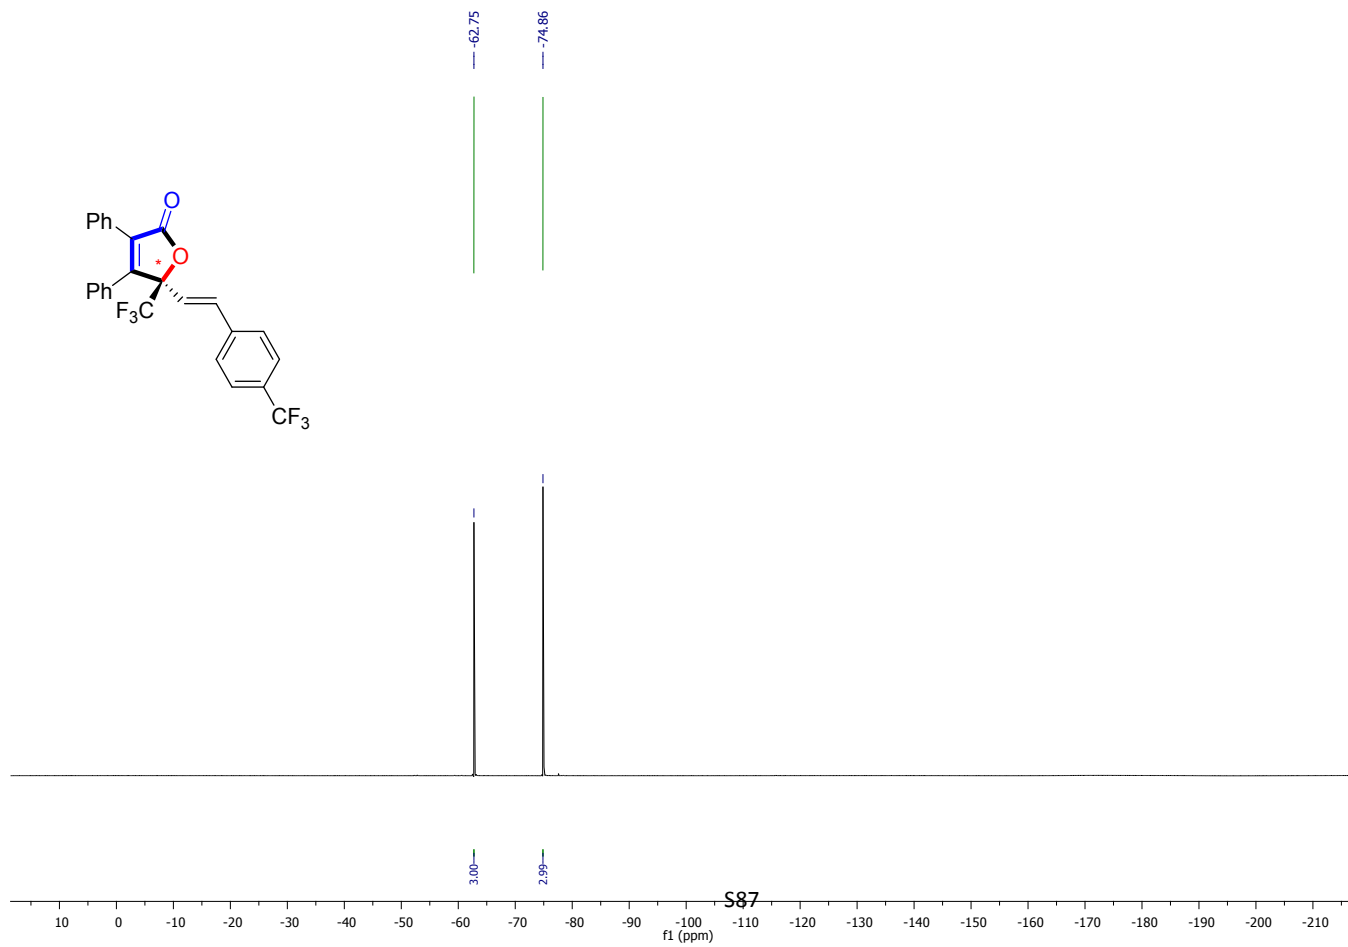

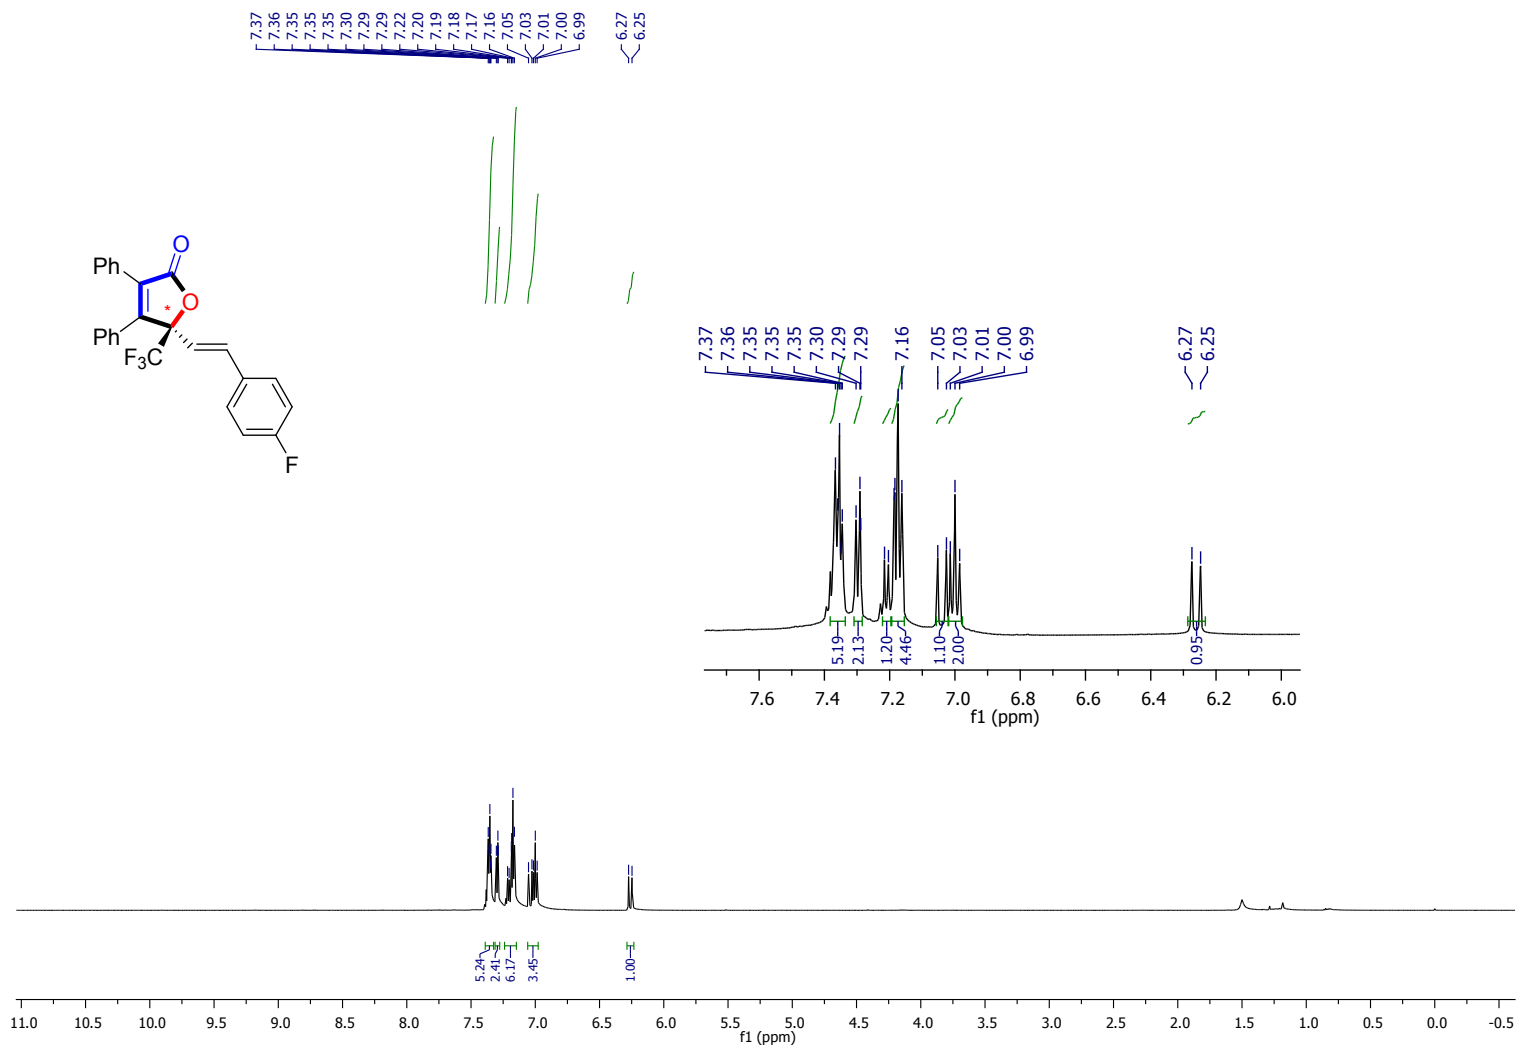



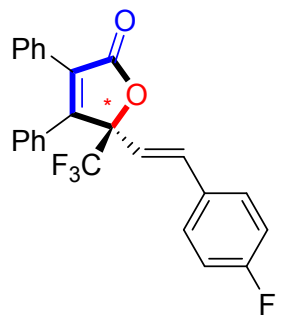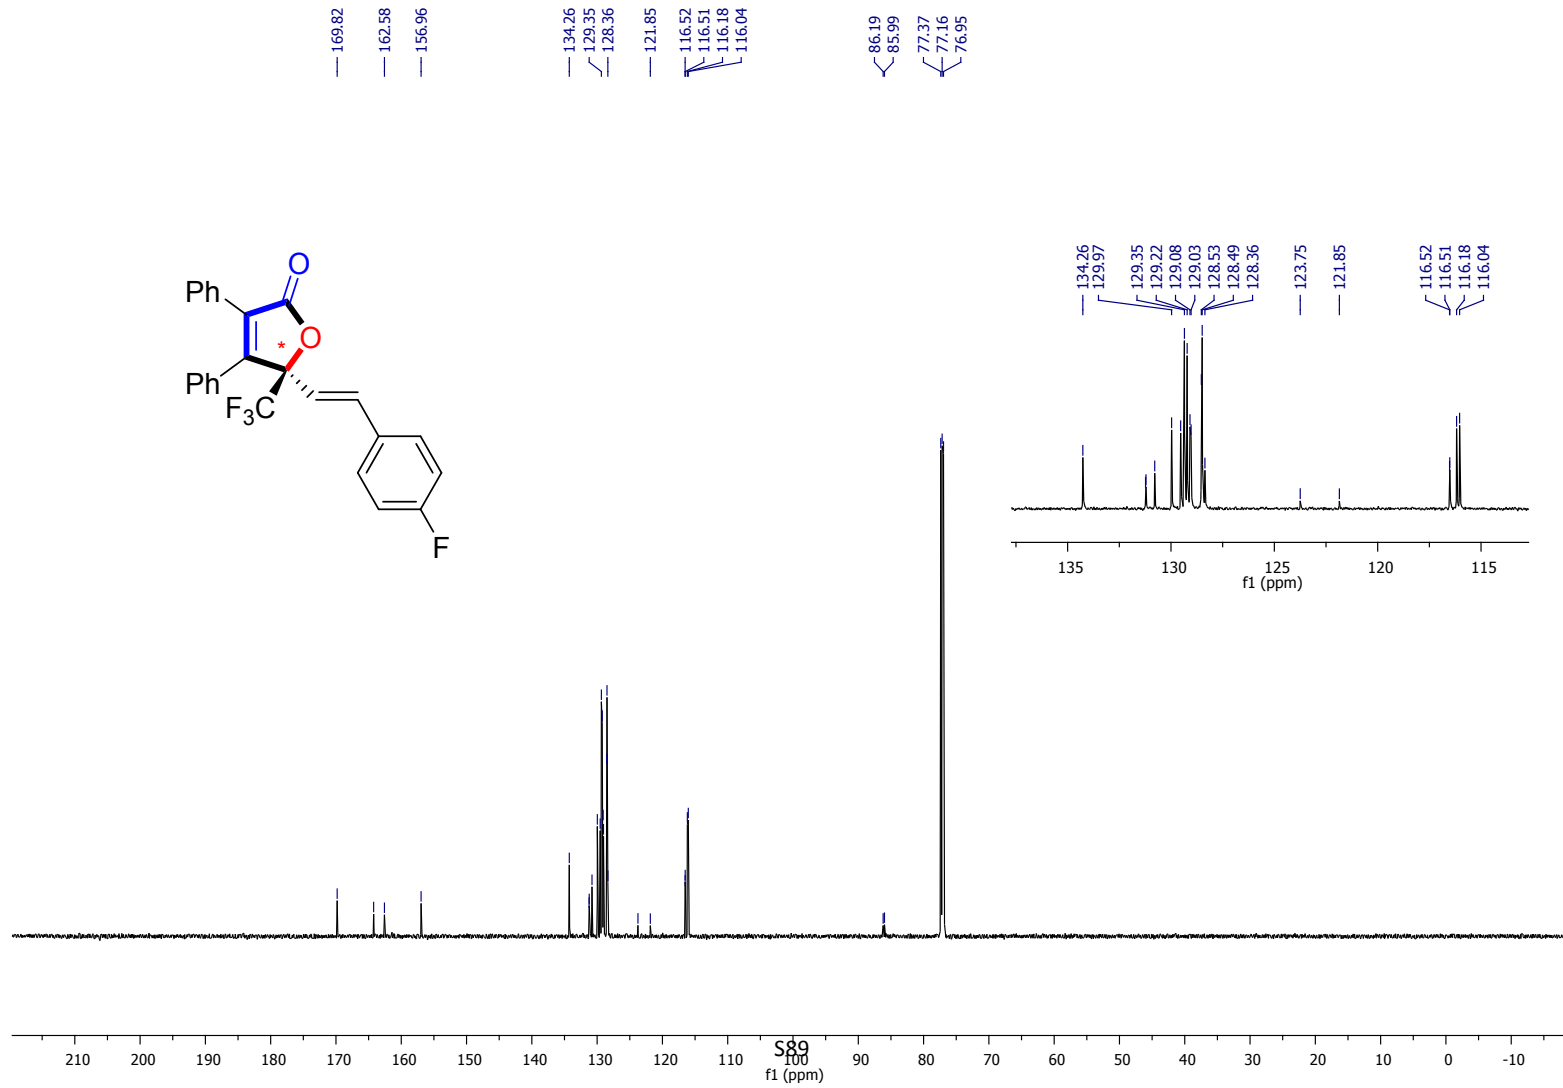



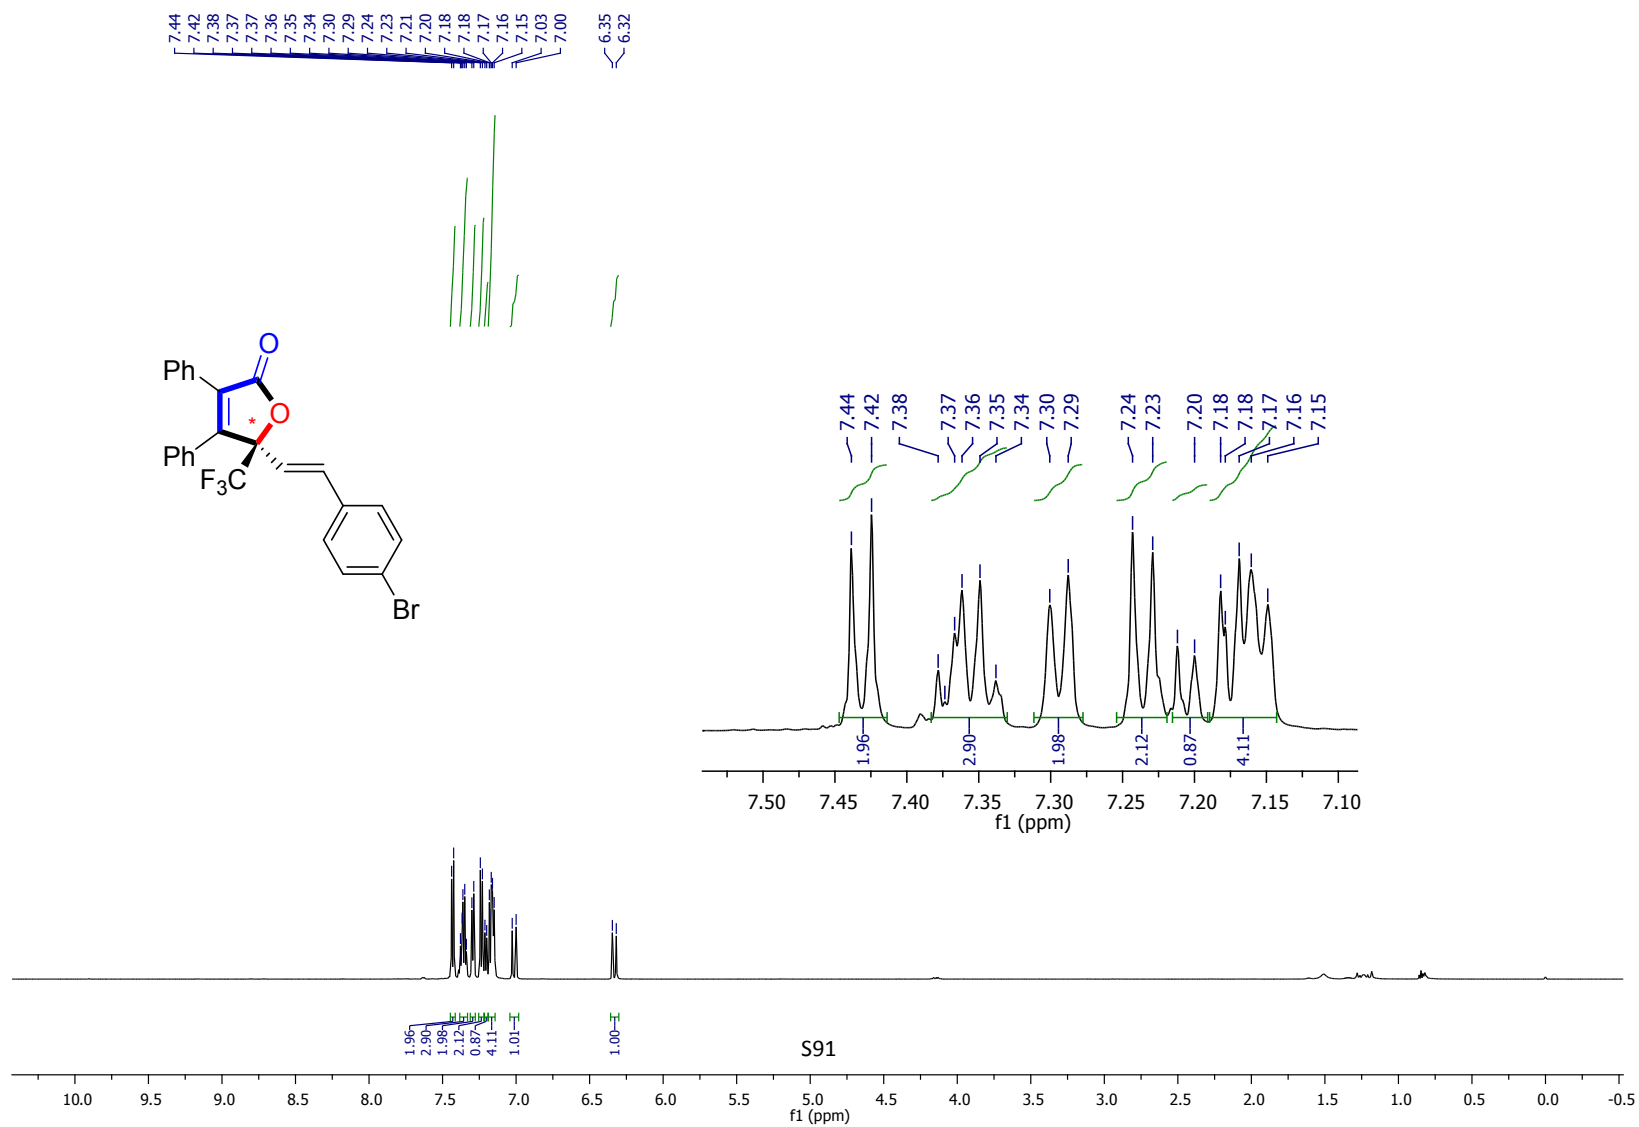

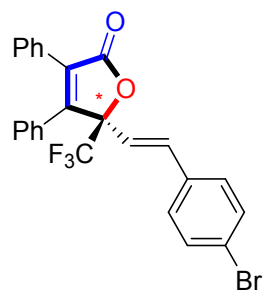

169.73

156.80

132.23  
130.71  
129.99  
129.55  
129.33  
129.23  
128.77  
128.49  
128.30  
125.57  
123.67  
123.48  
121.78  
119.88  
117.57

86.36  
86.15  
85.95  
85.74  
77.37  
77.16  
76.95

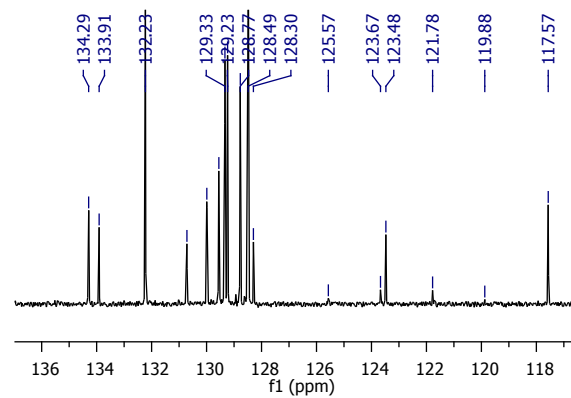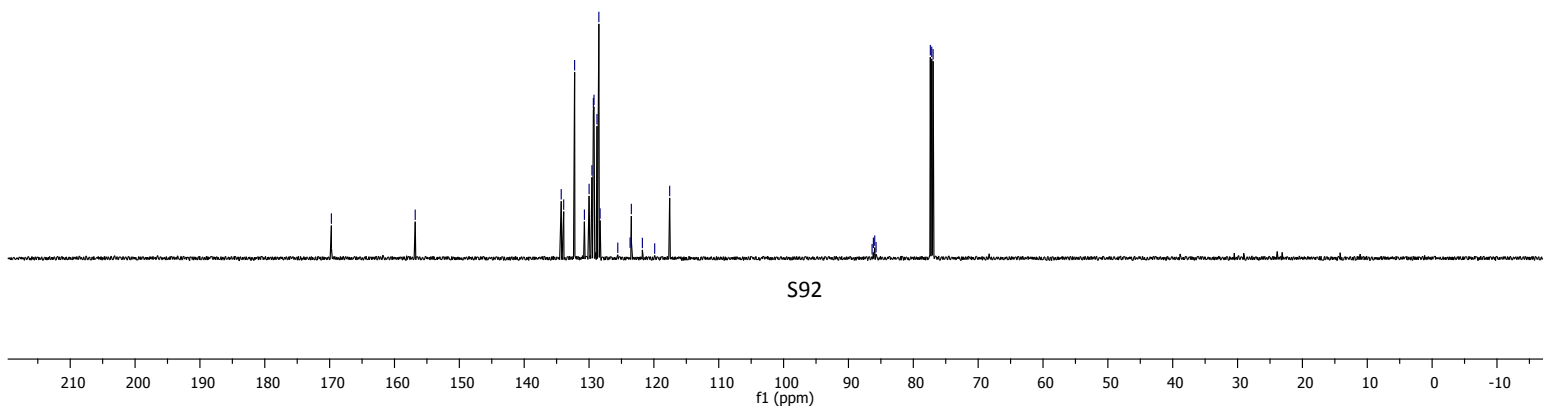

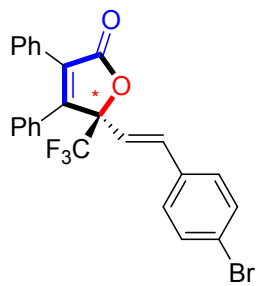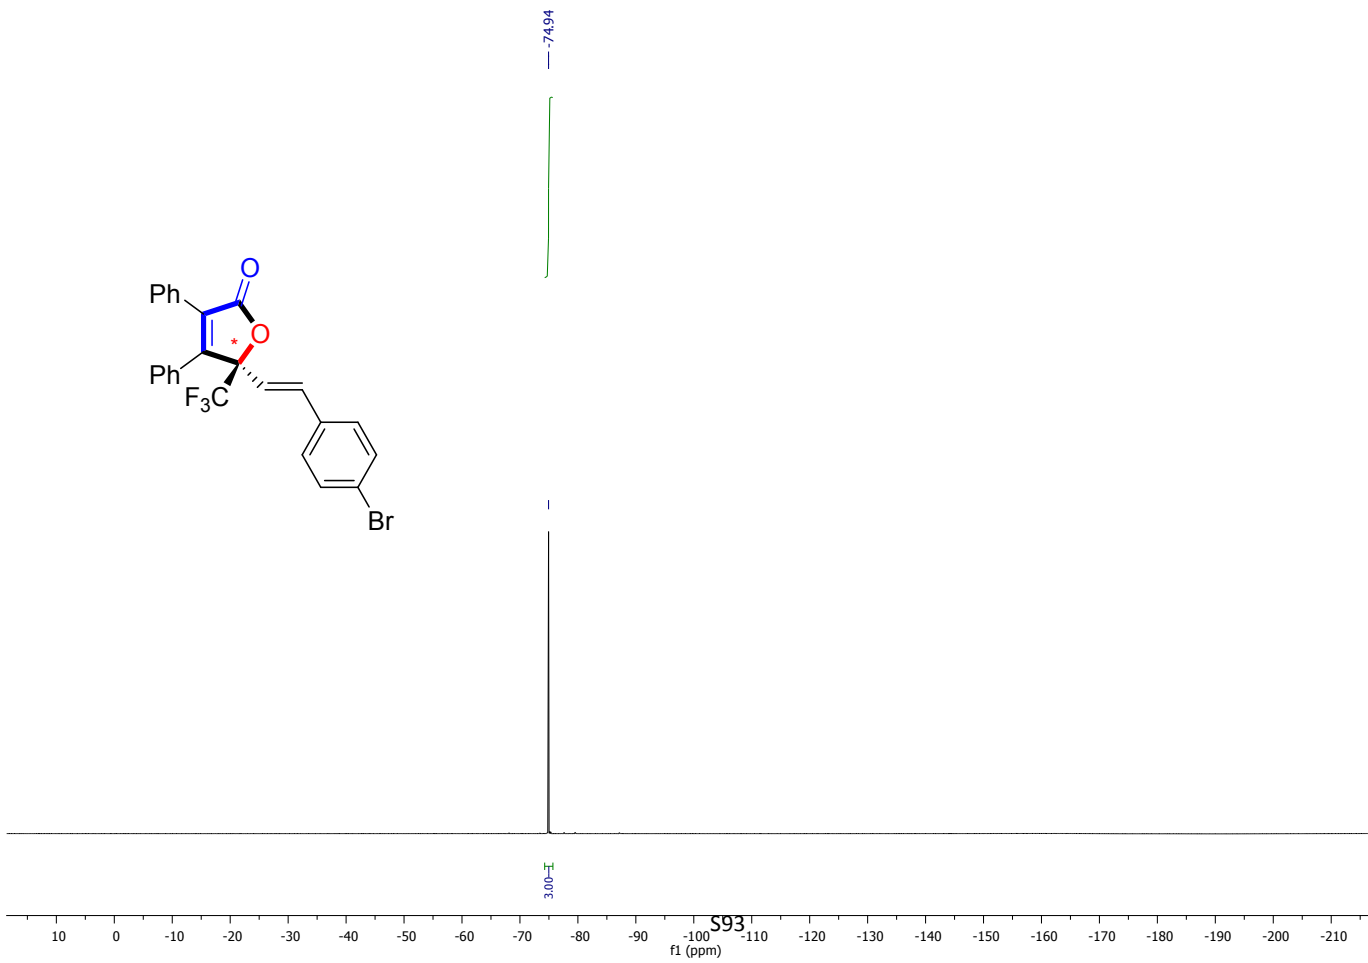

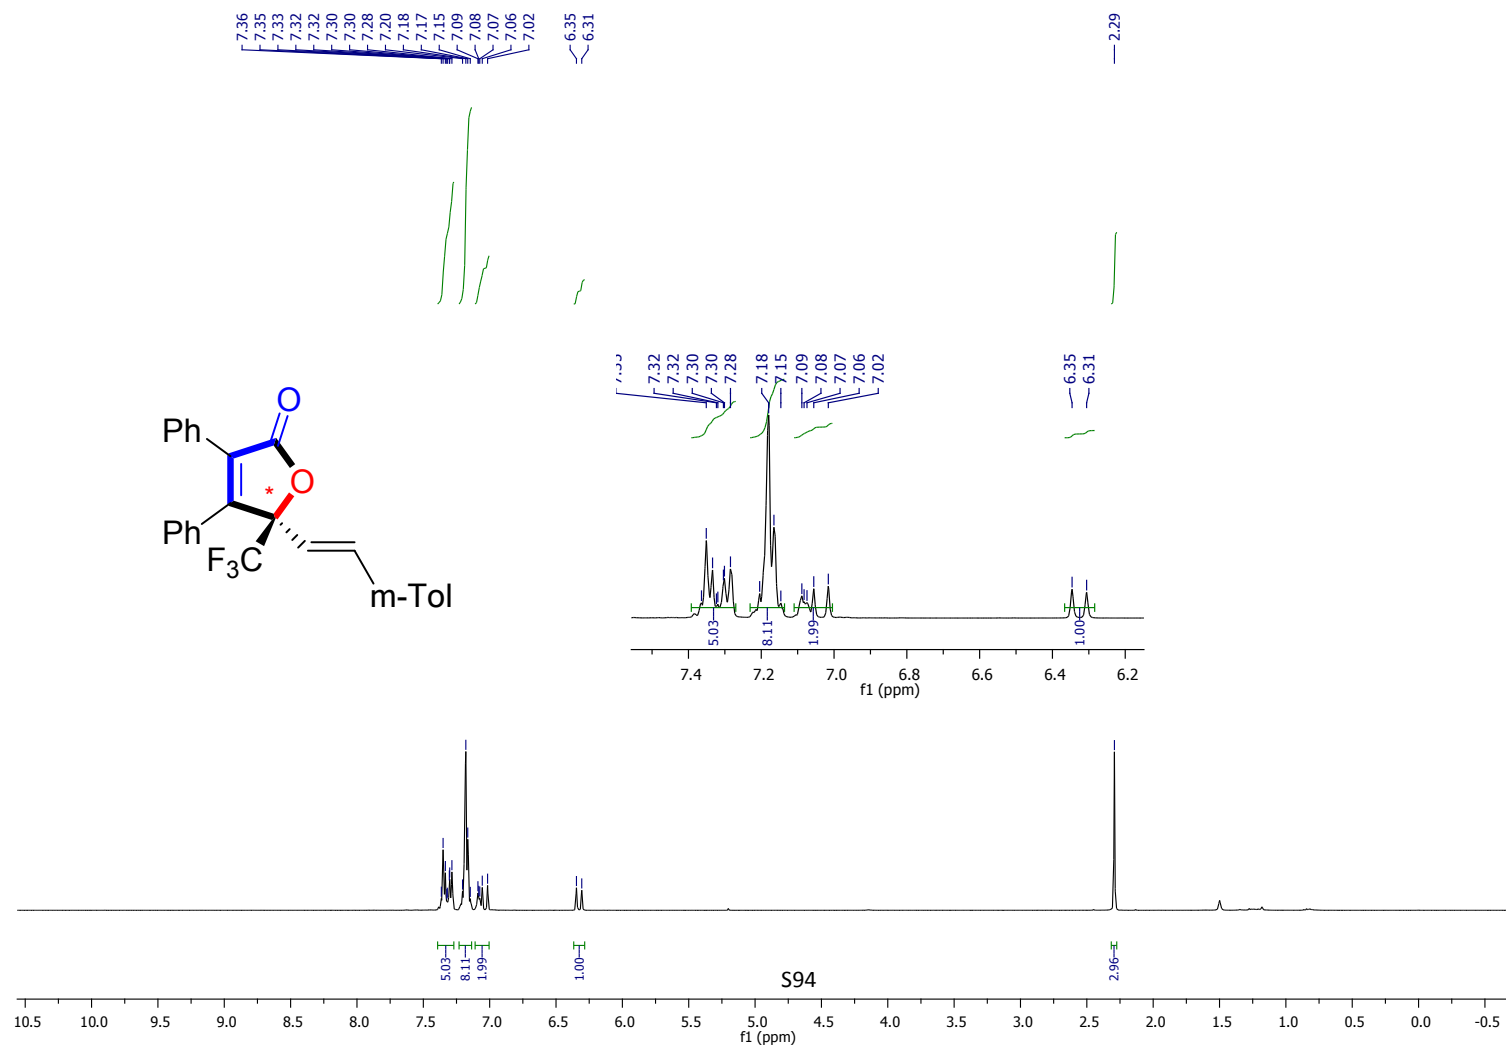

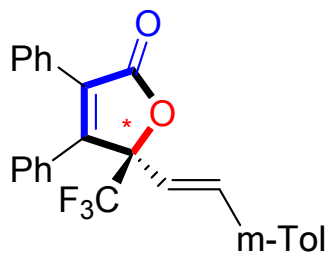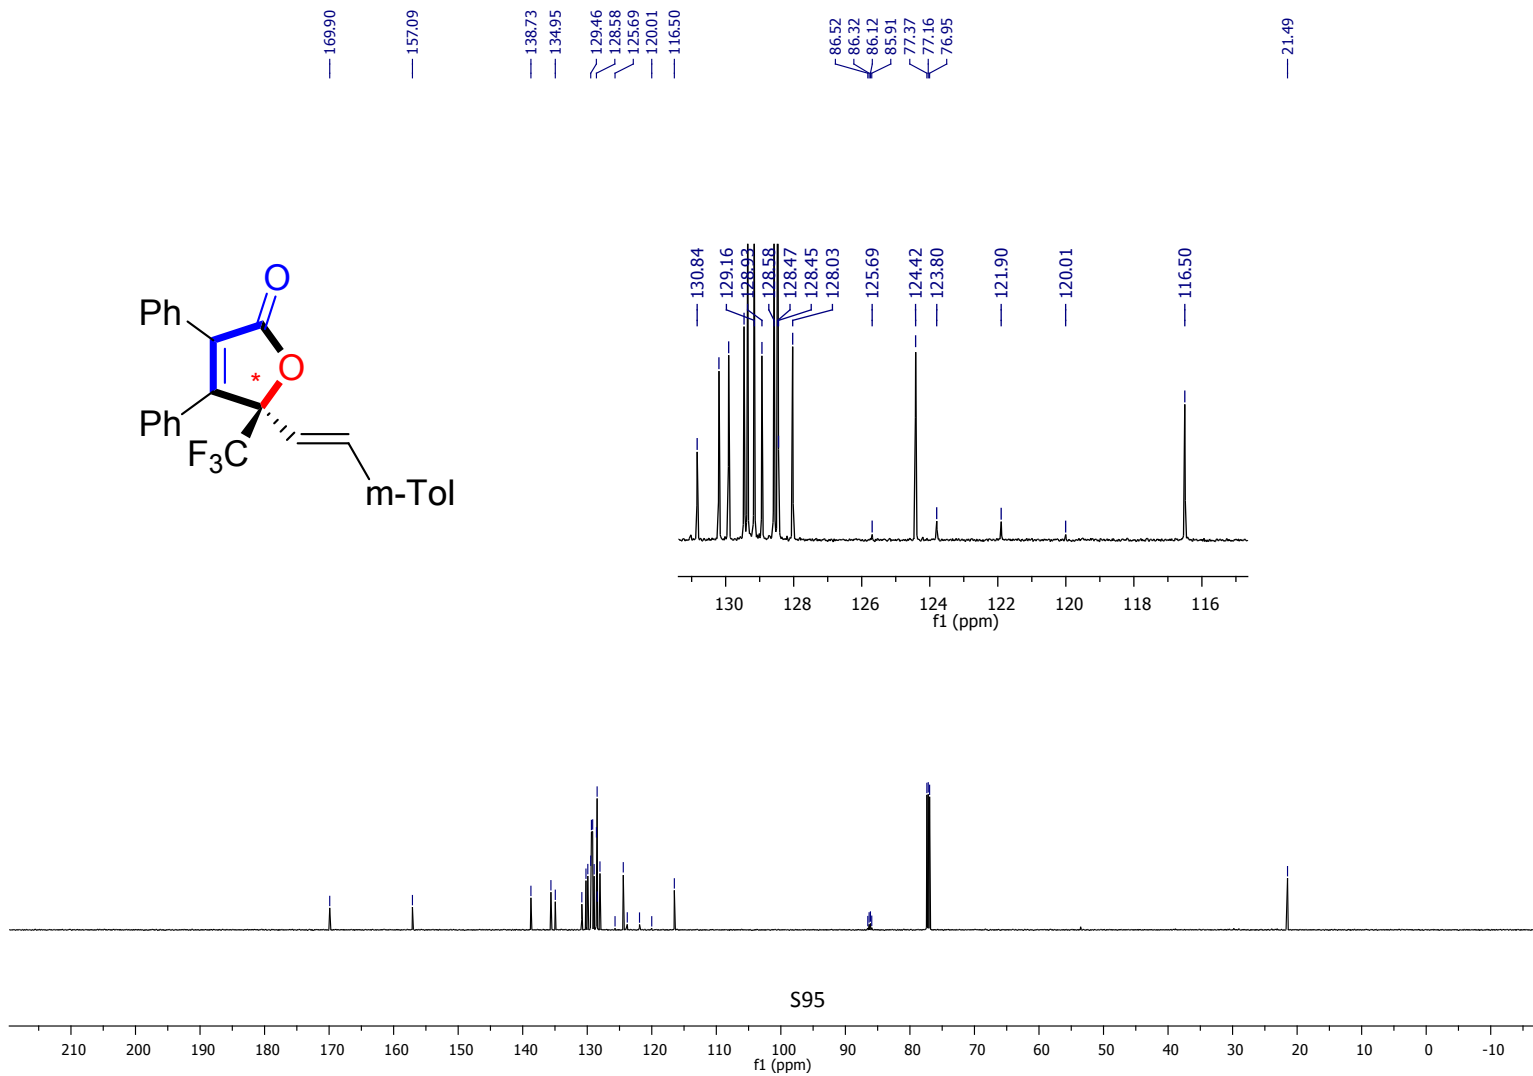

S95

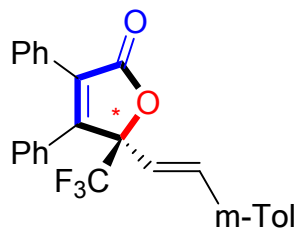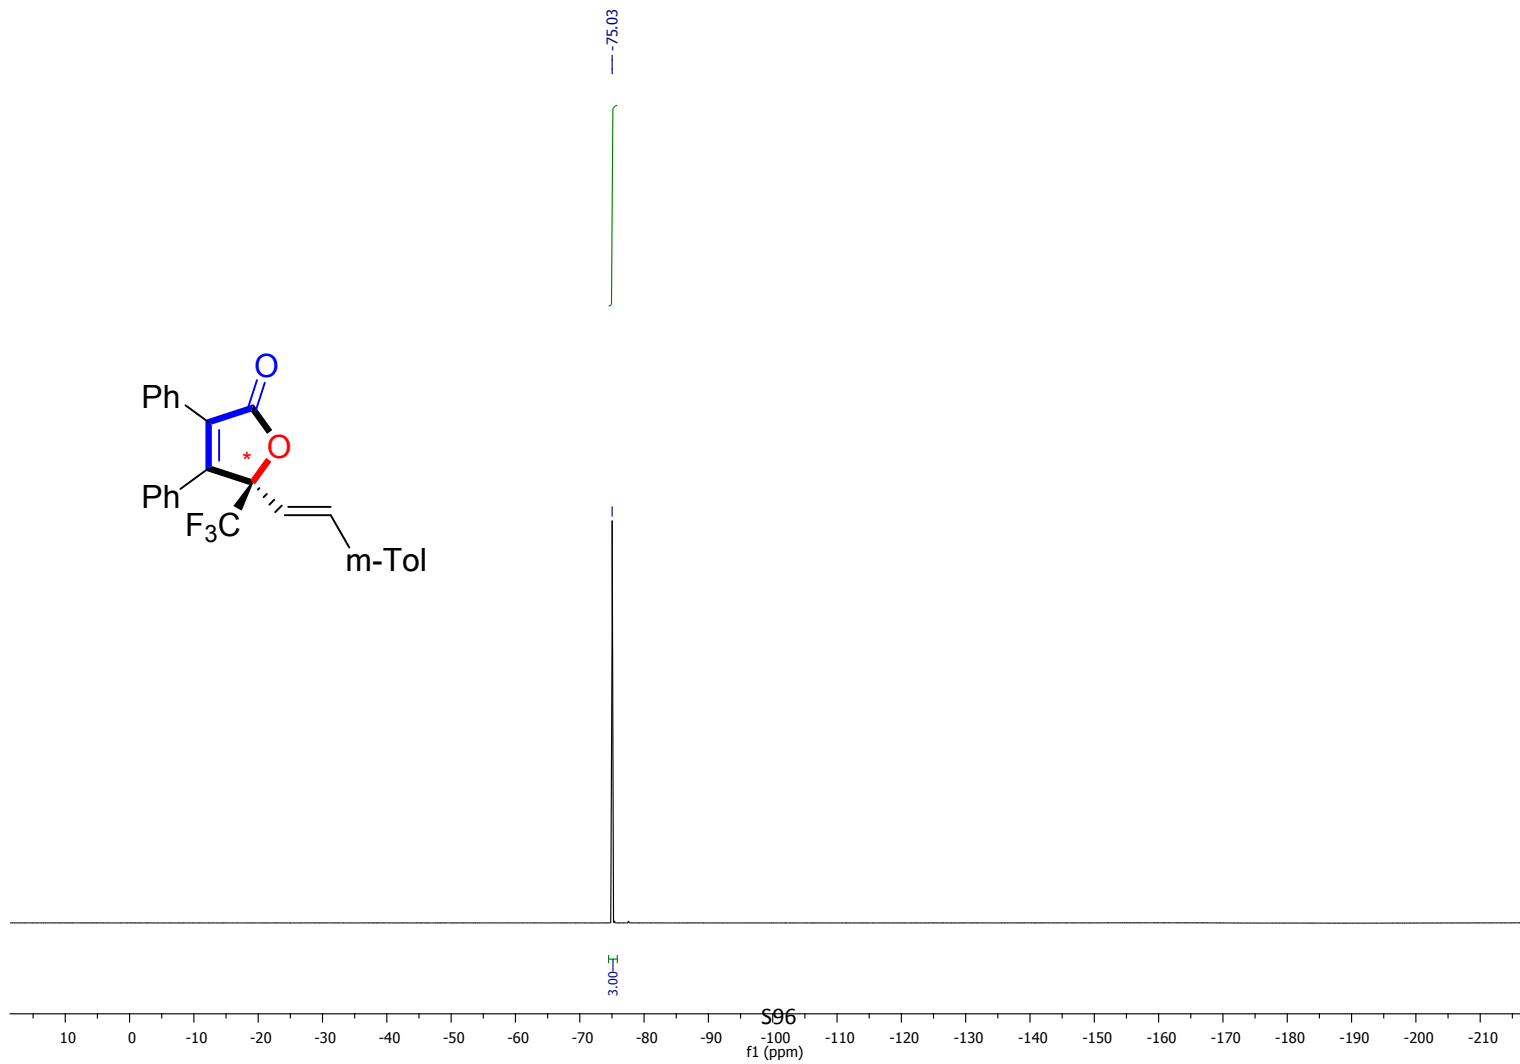



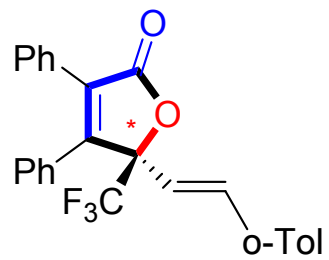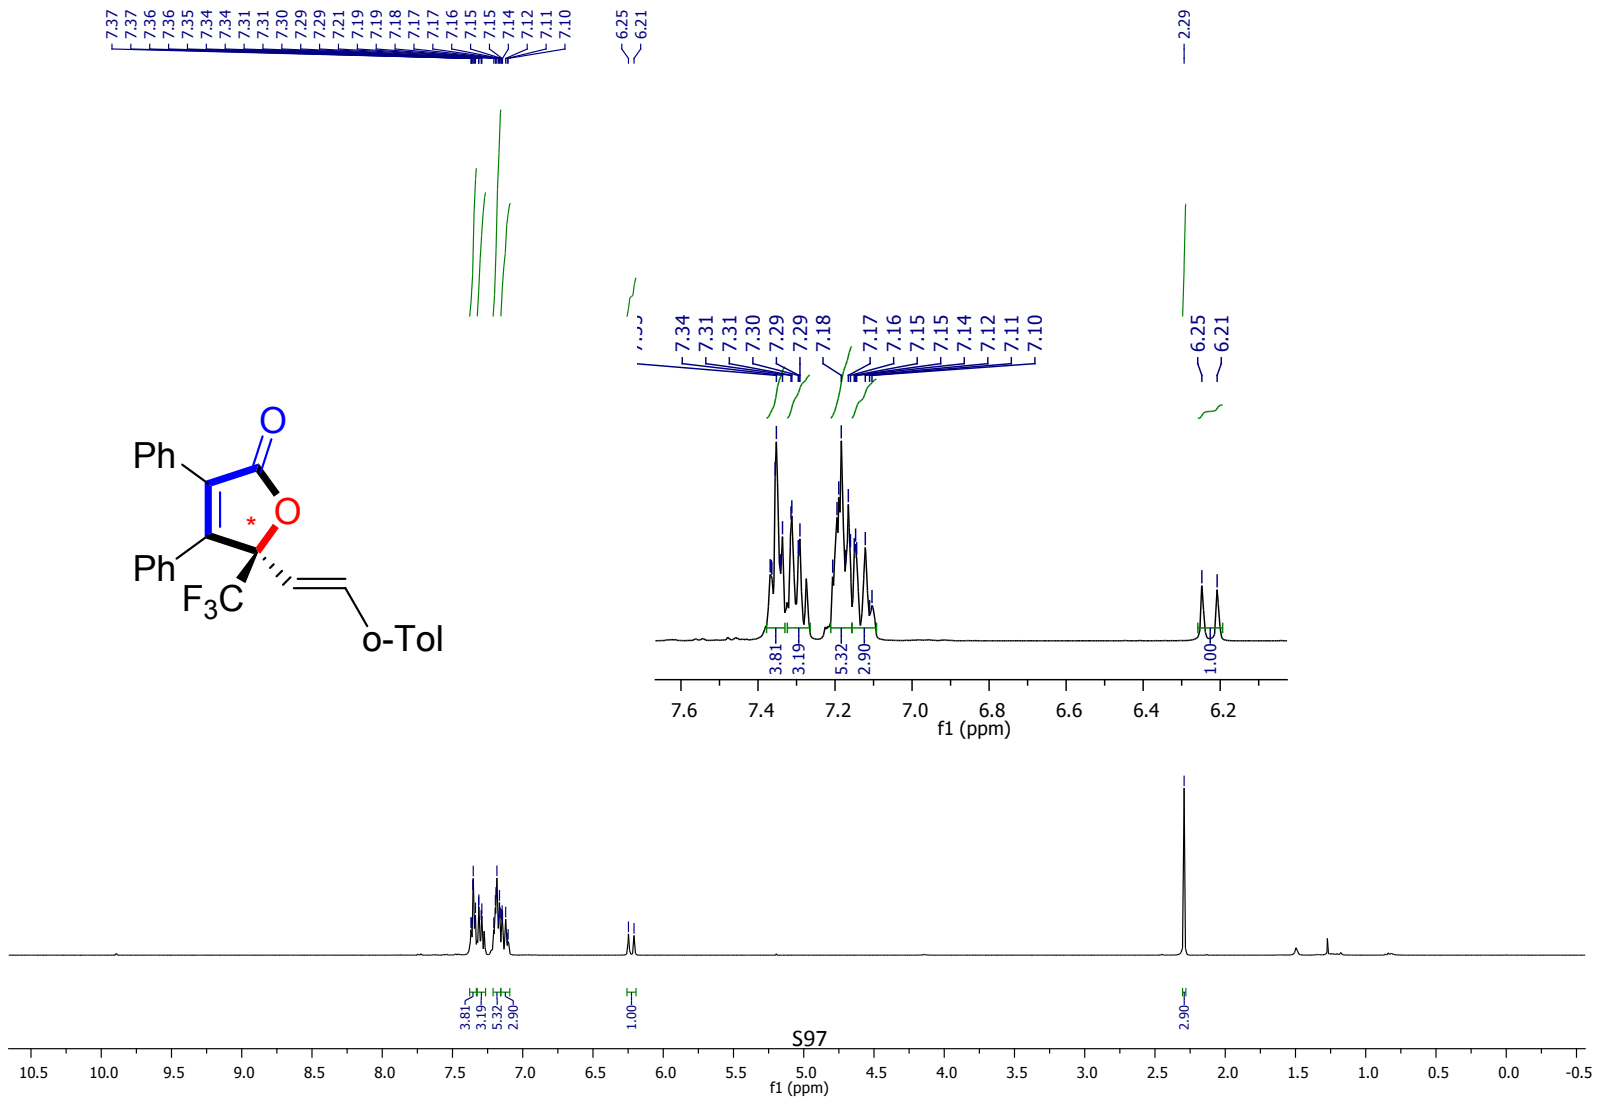

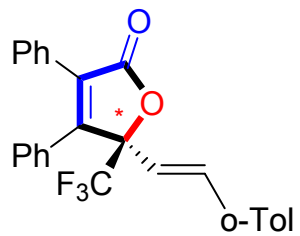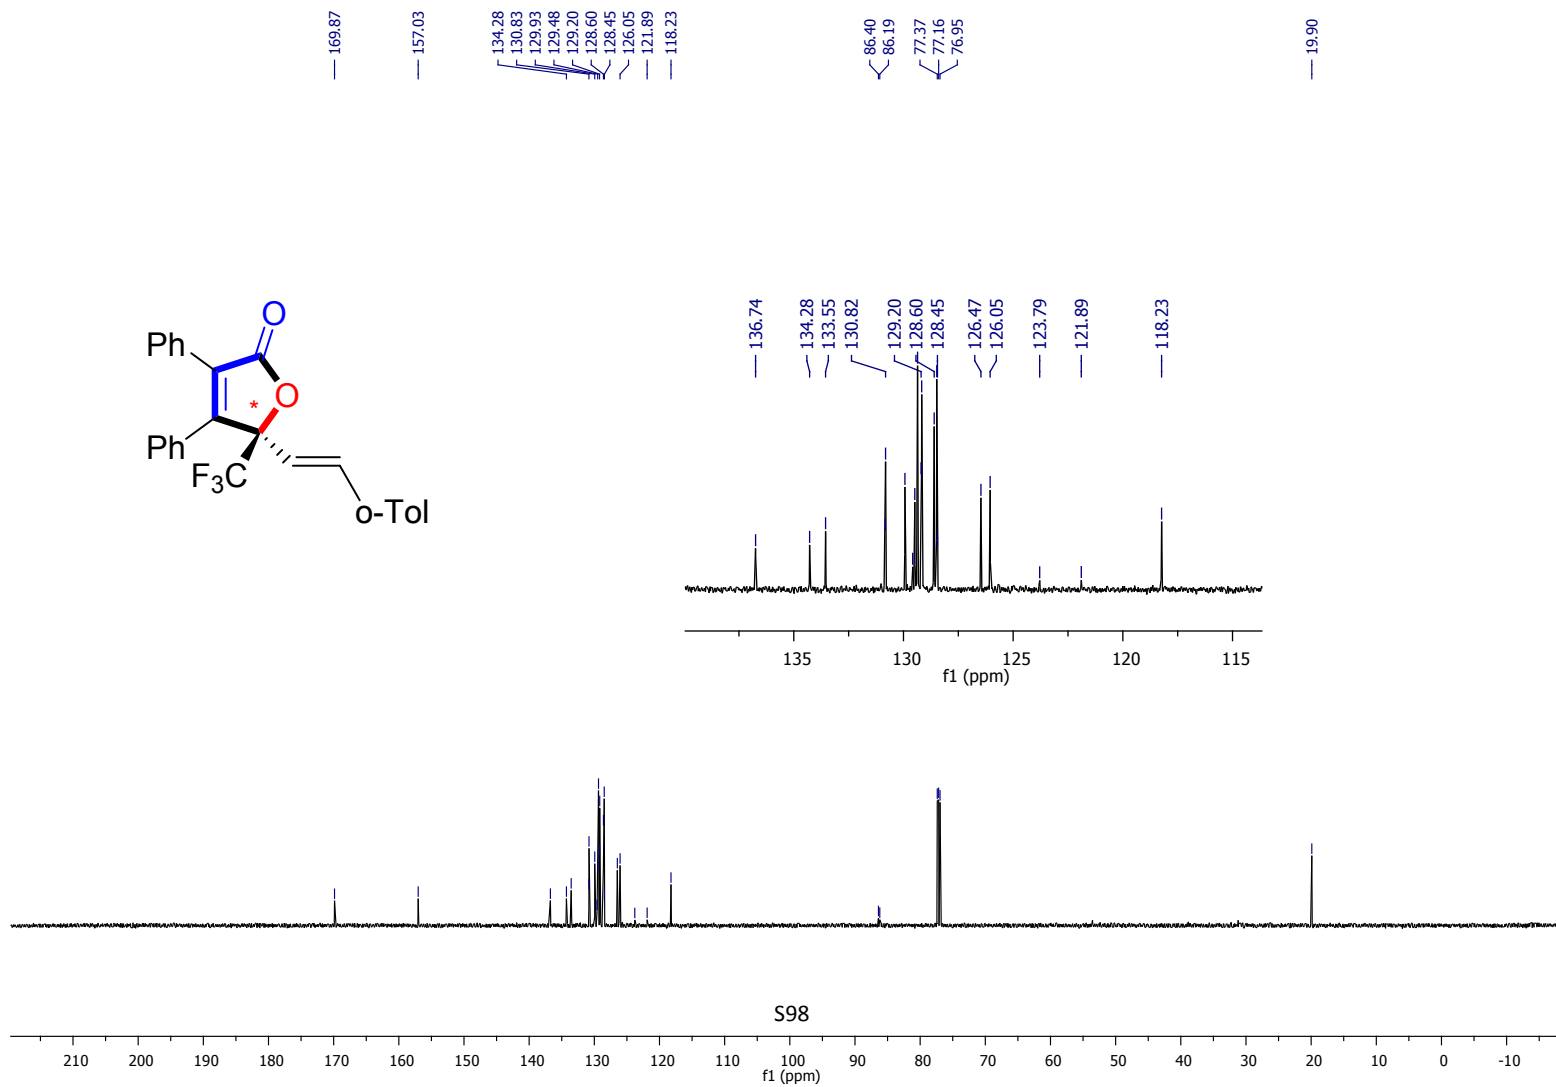

S98

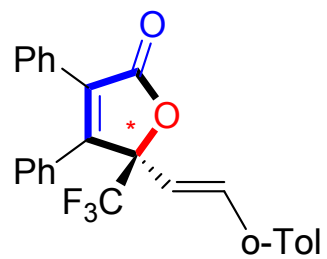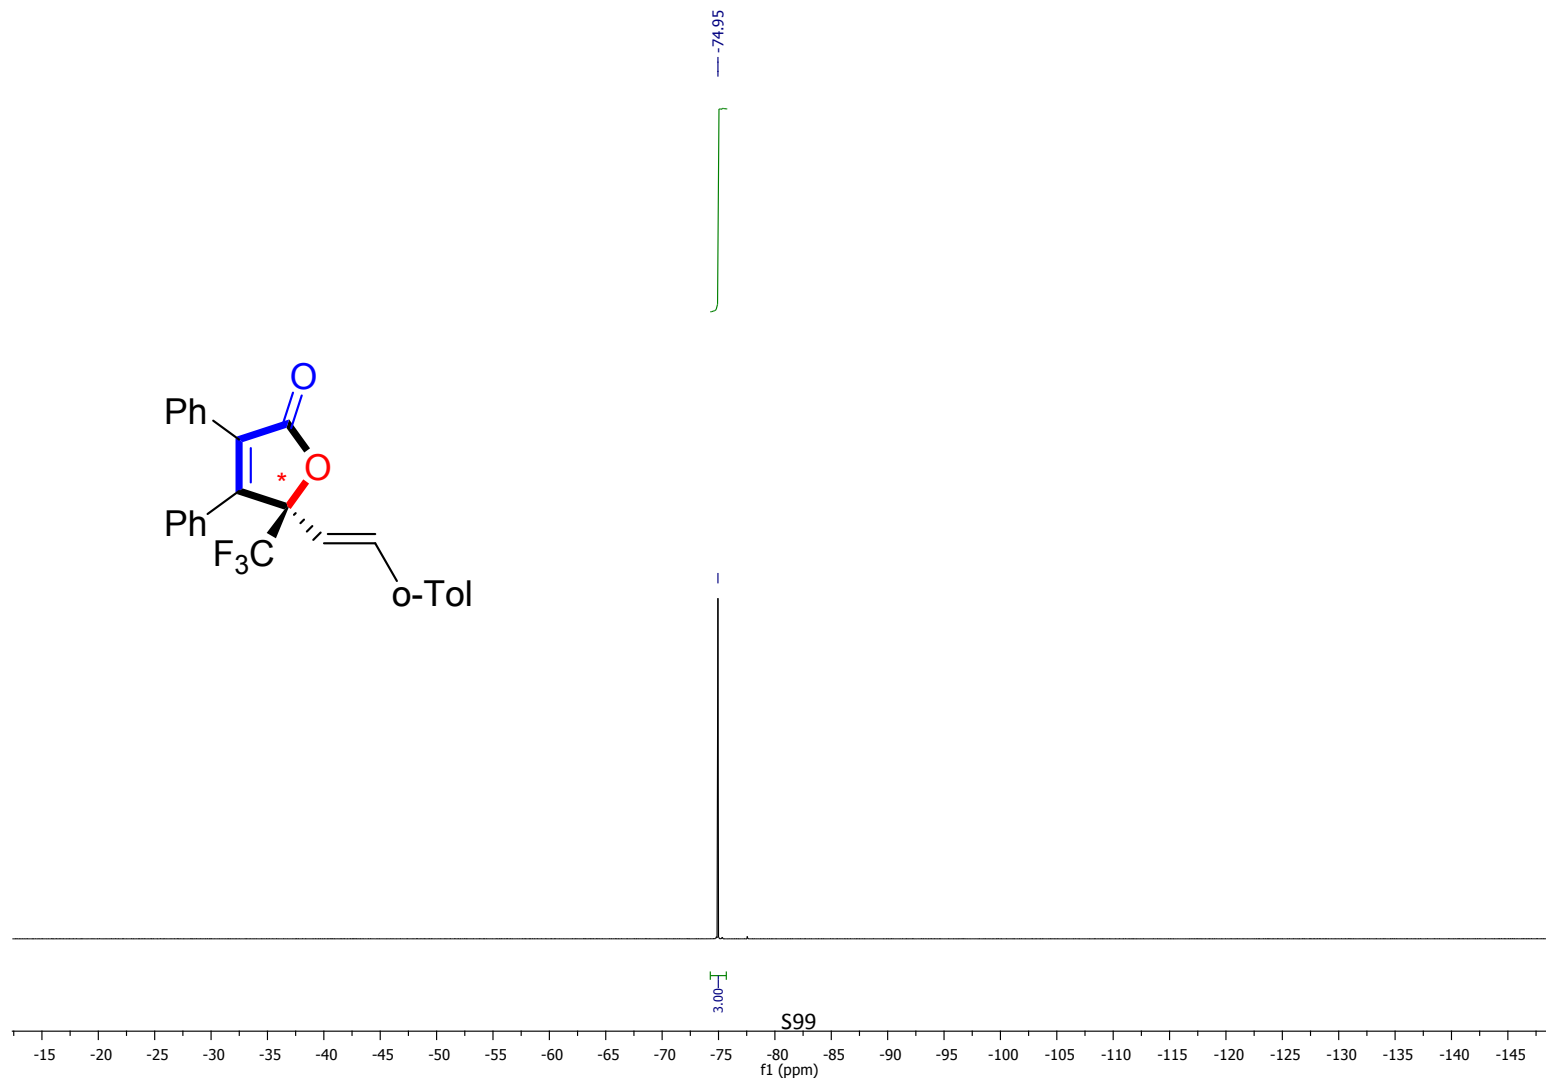

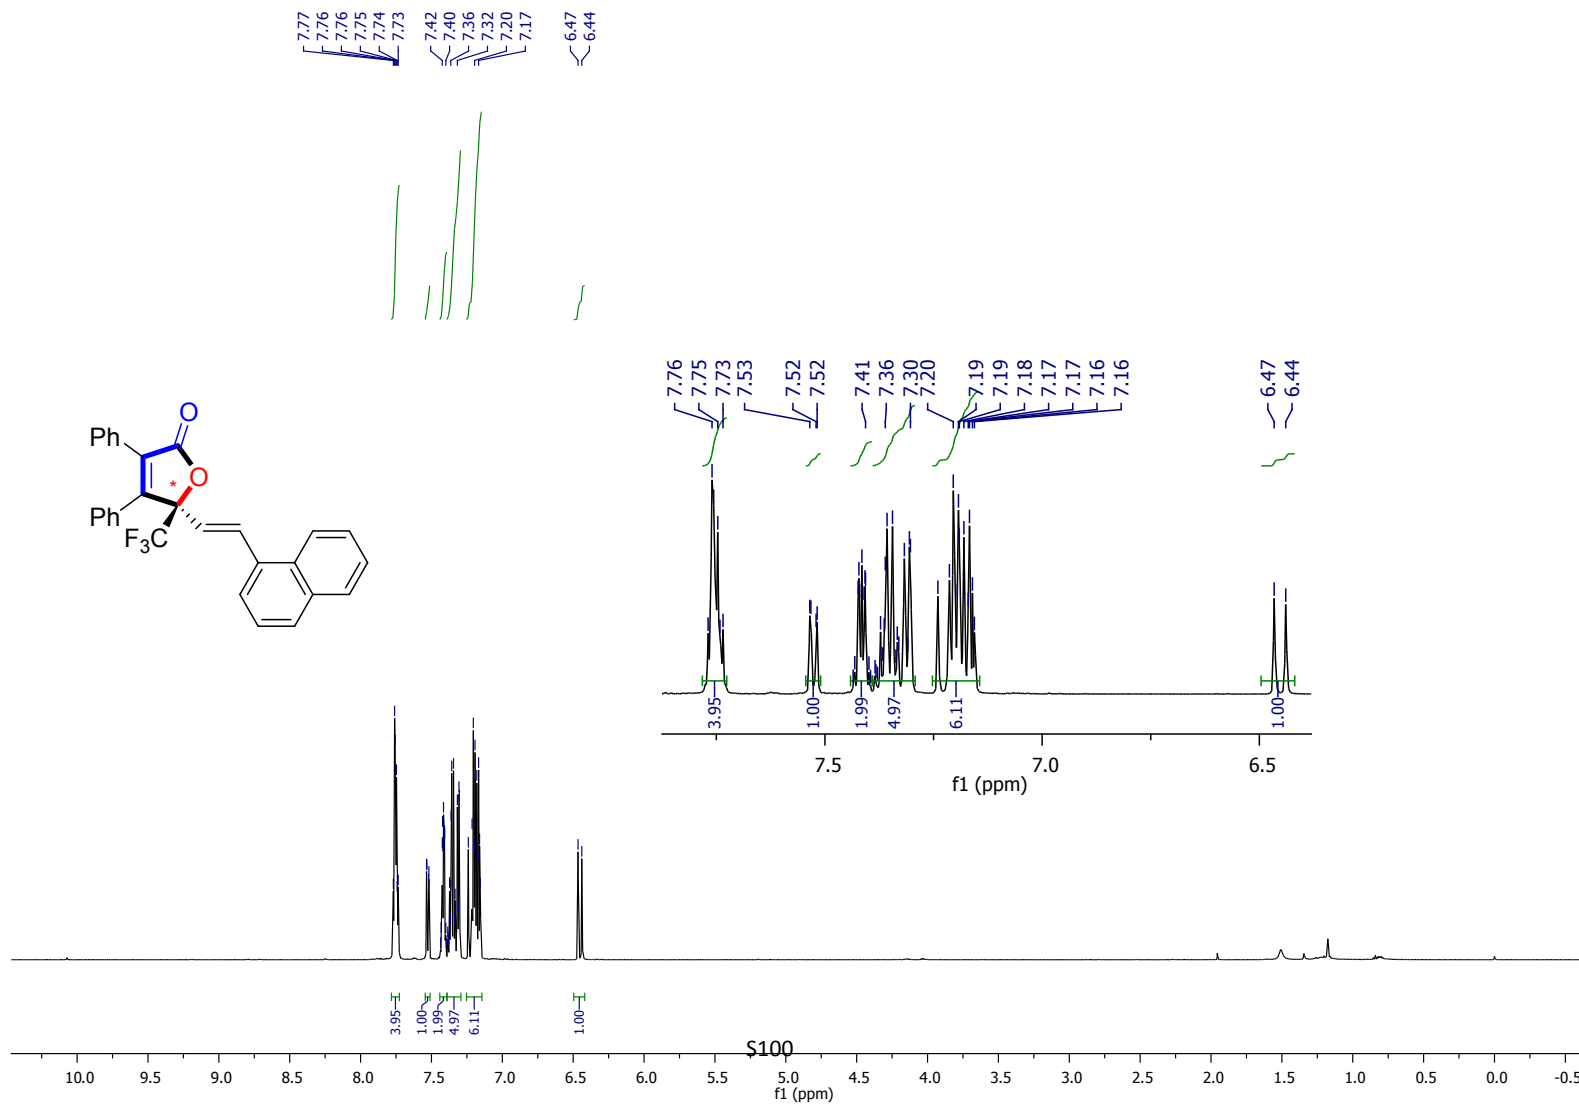

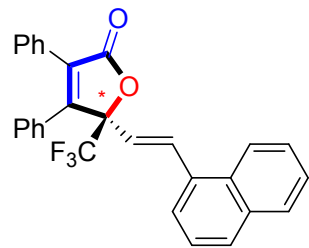

169.87  
157.04  
135.62  
129.95  
129.49  
129.19  
128.62  
128.40  
126.95  
124.34  
121.49  
117.02  
86.80  
86.75  
86.44  
86.14  
85.83  
77.48  
77.16  
76.84

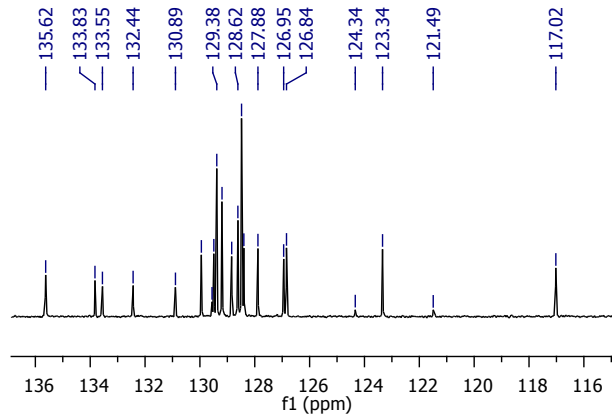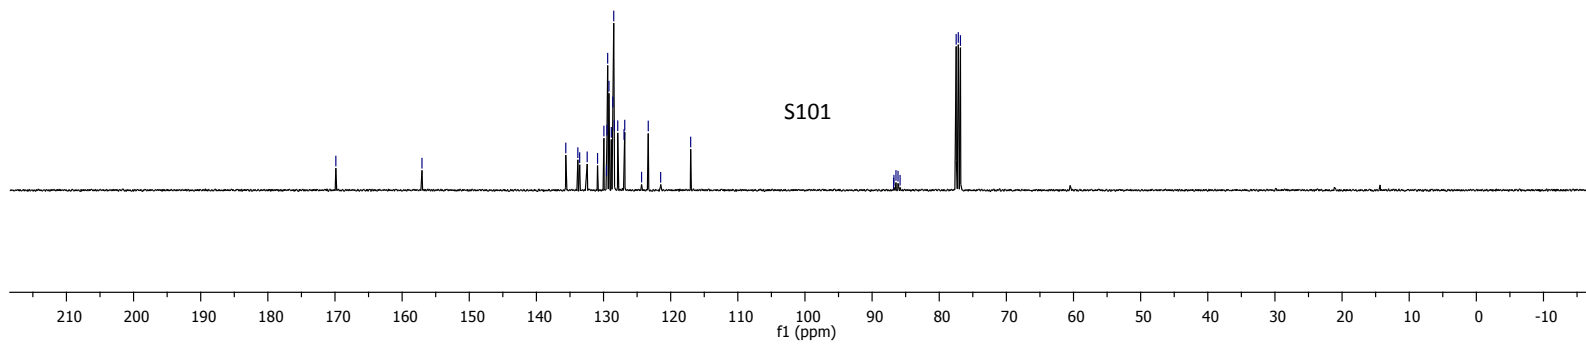

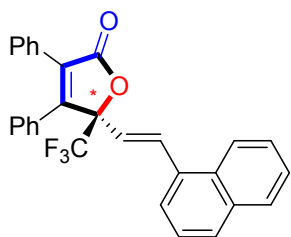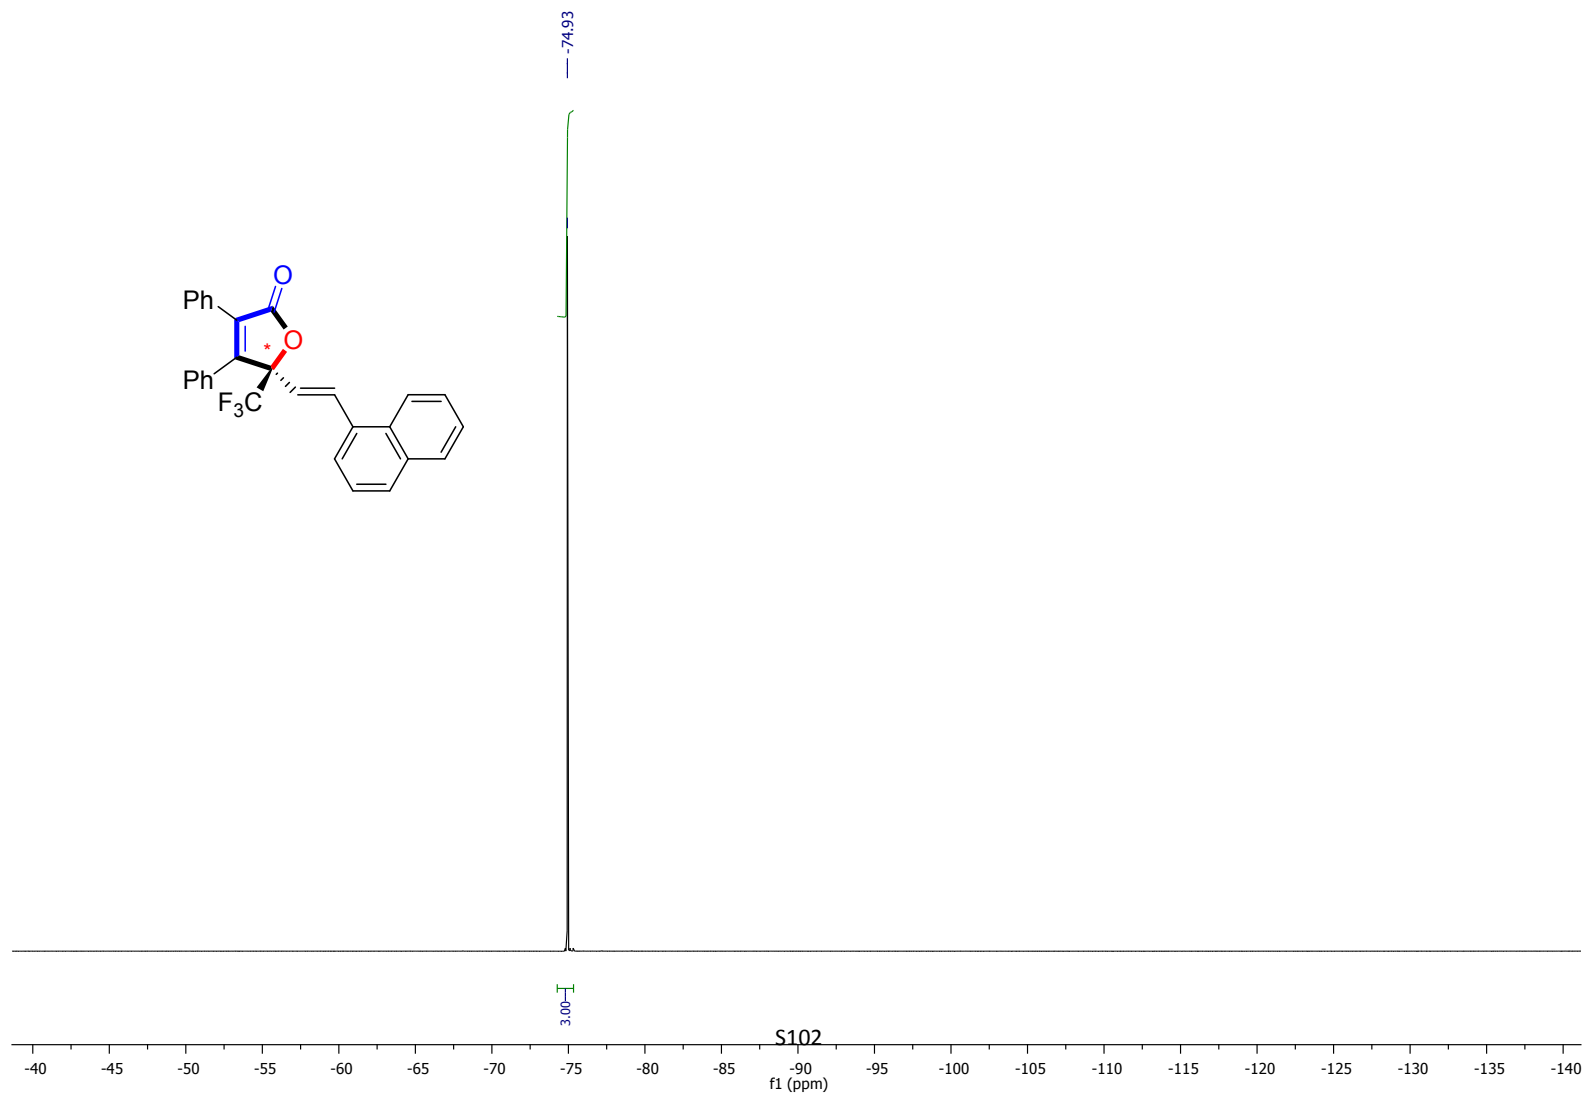

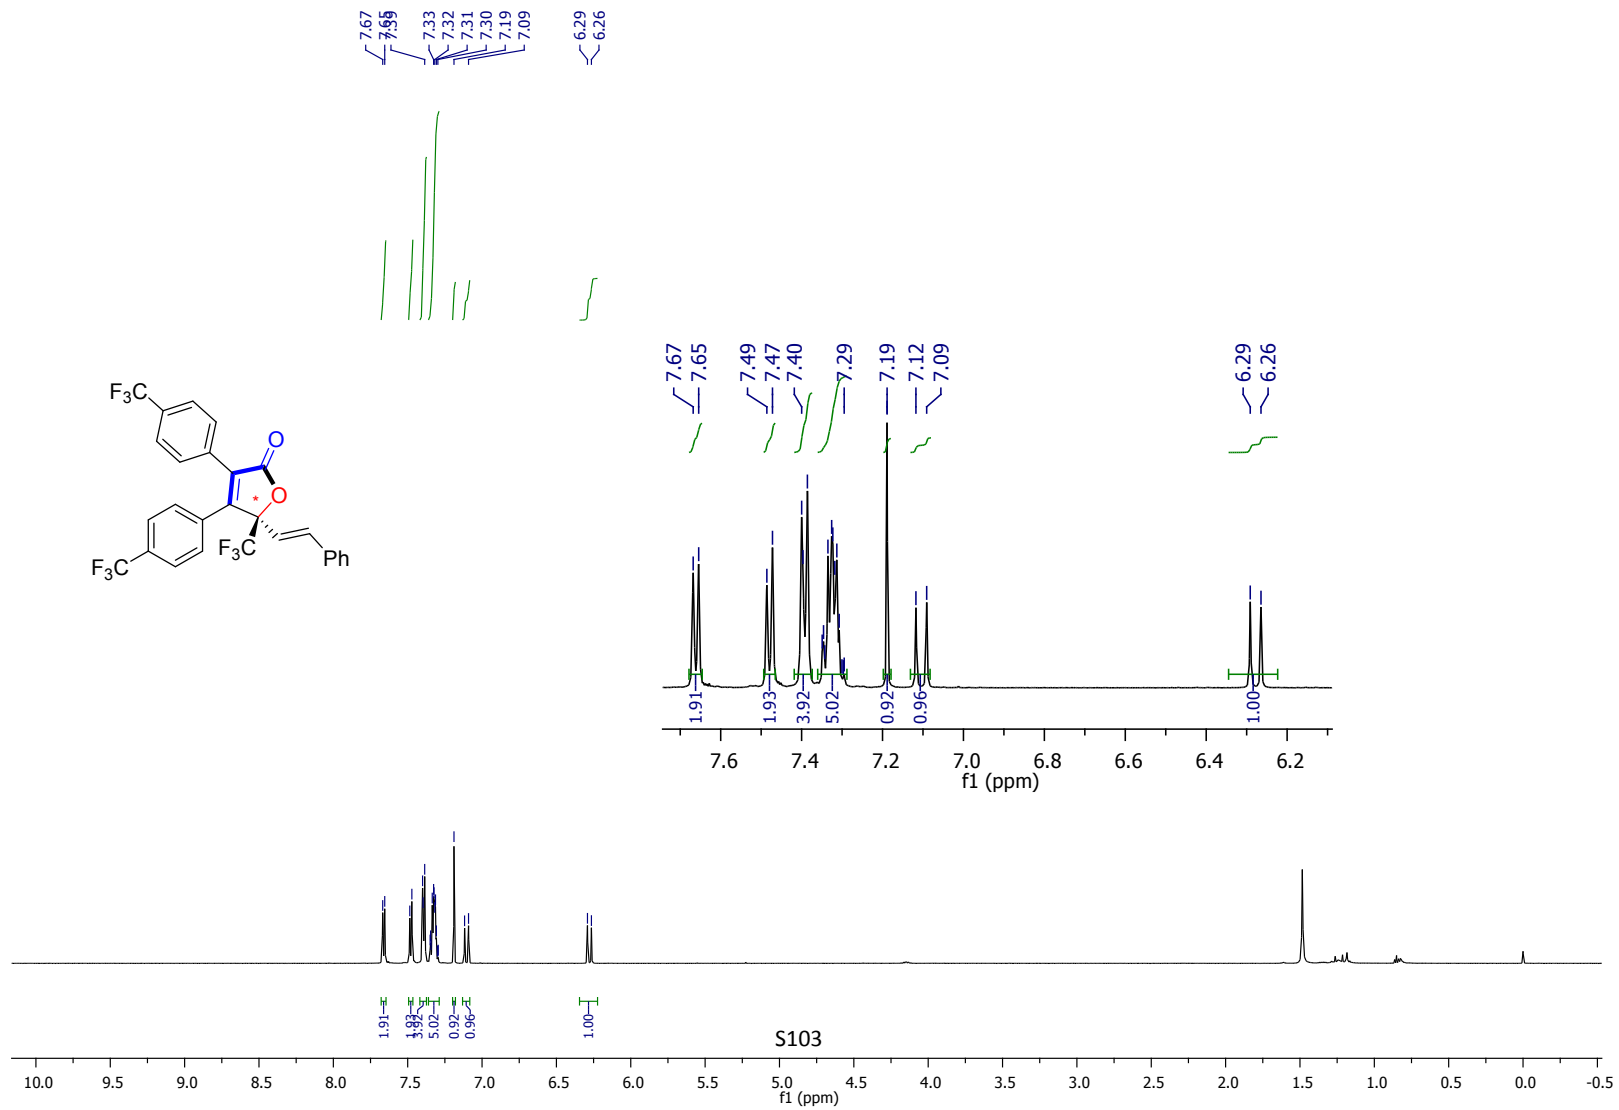

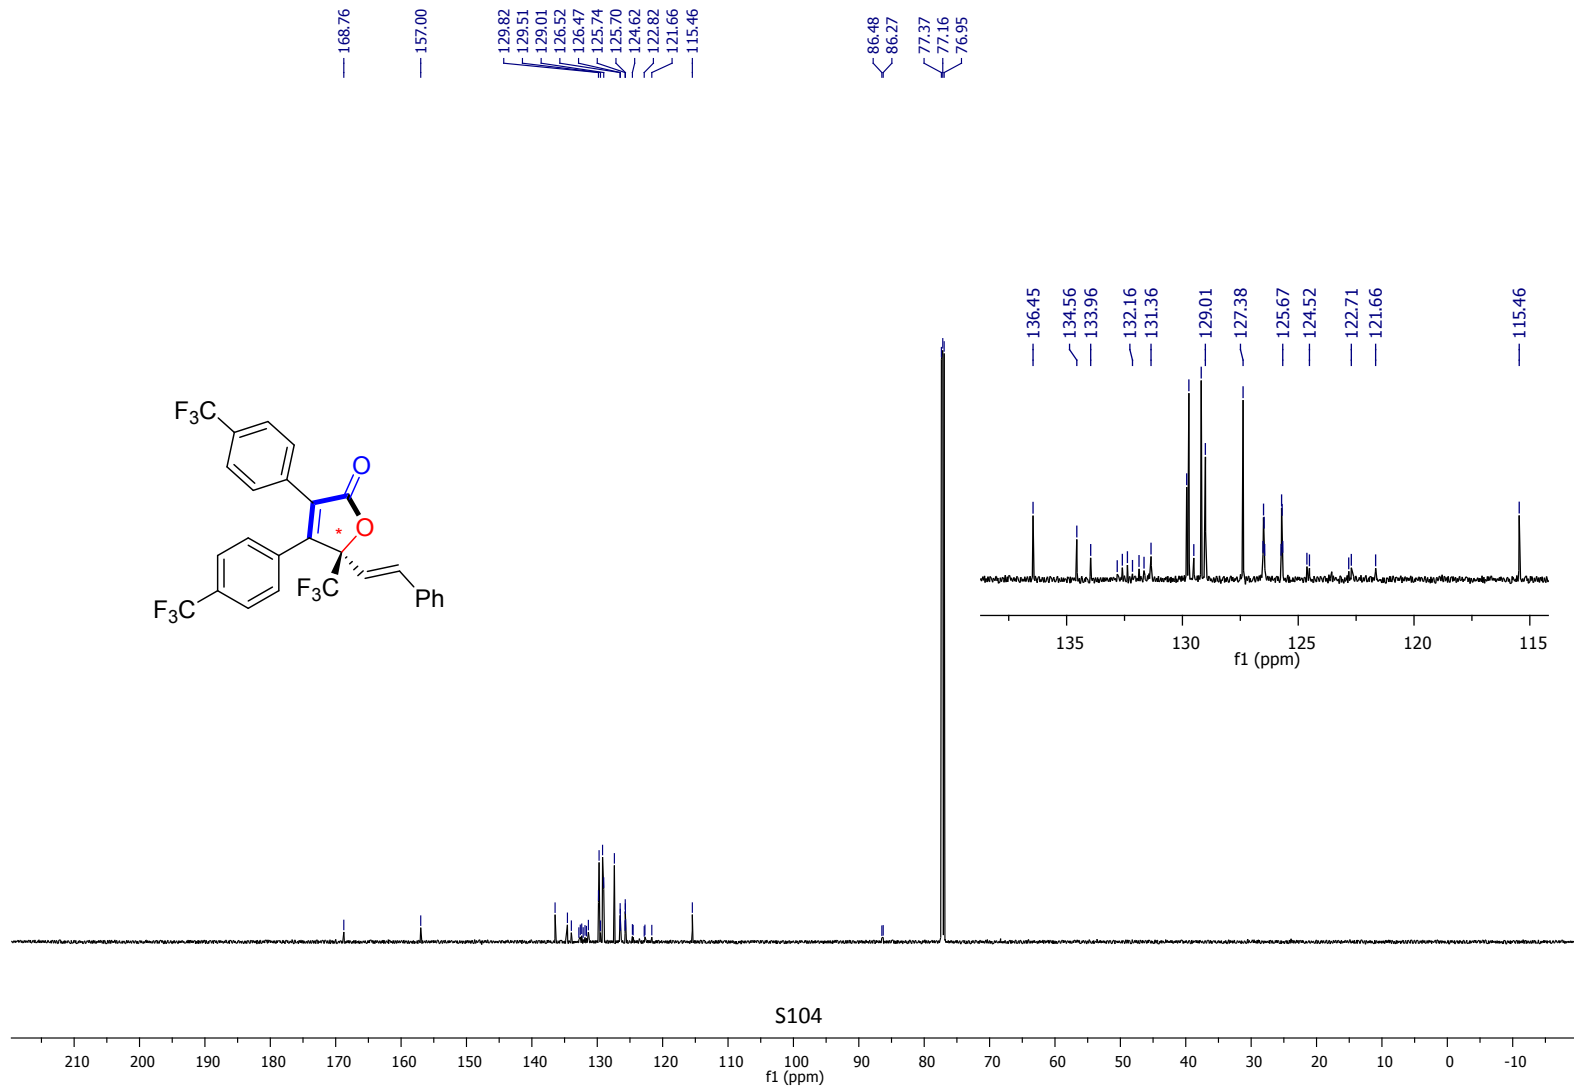

S104



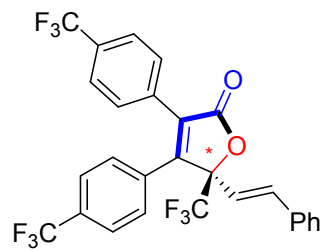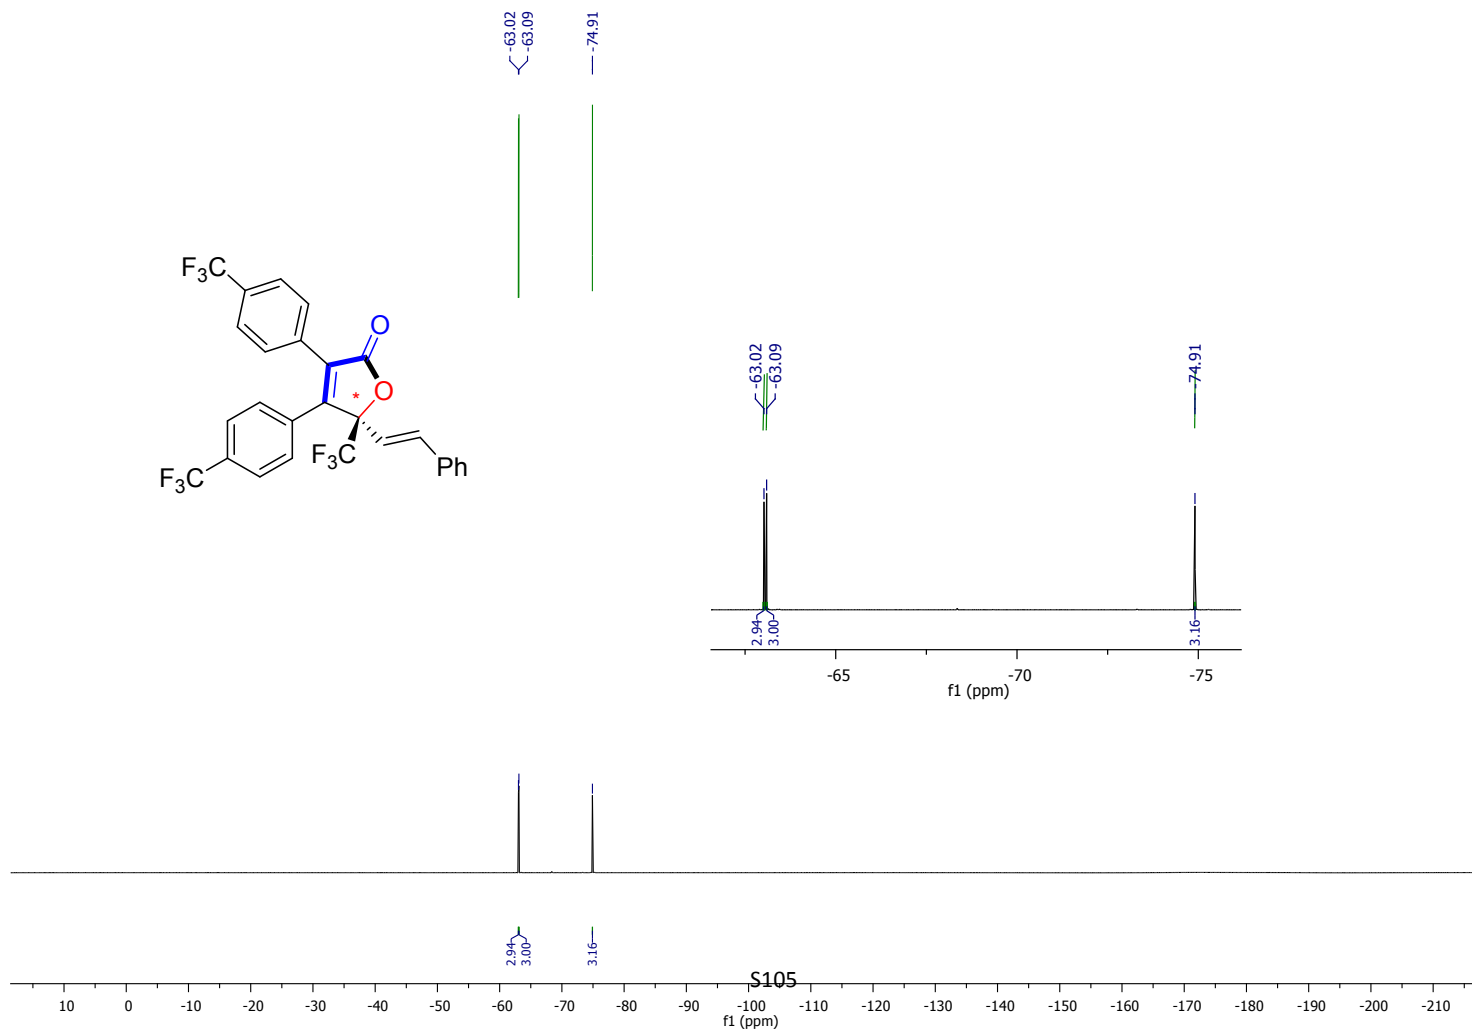

S105

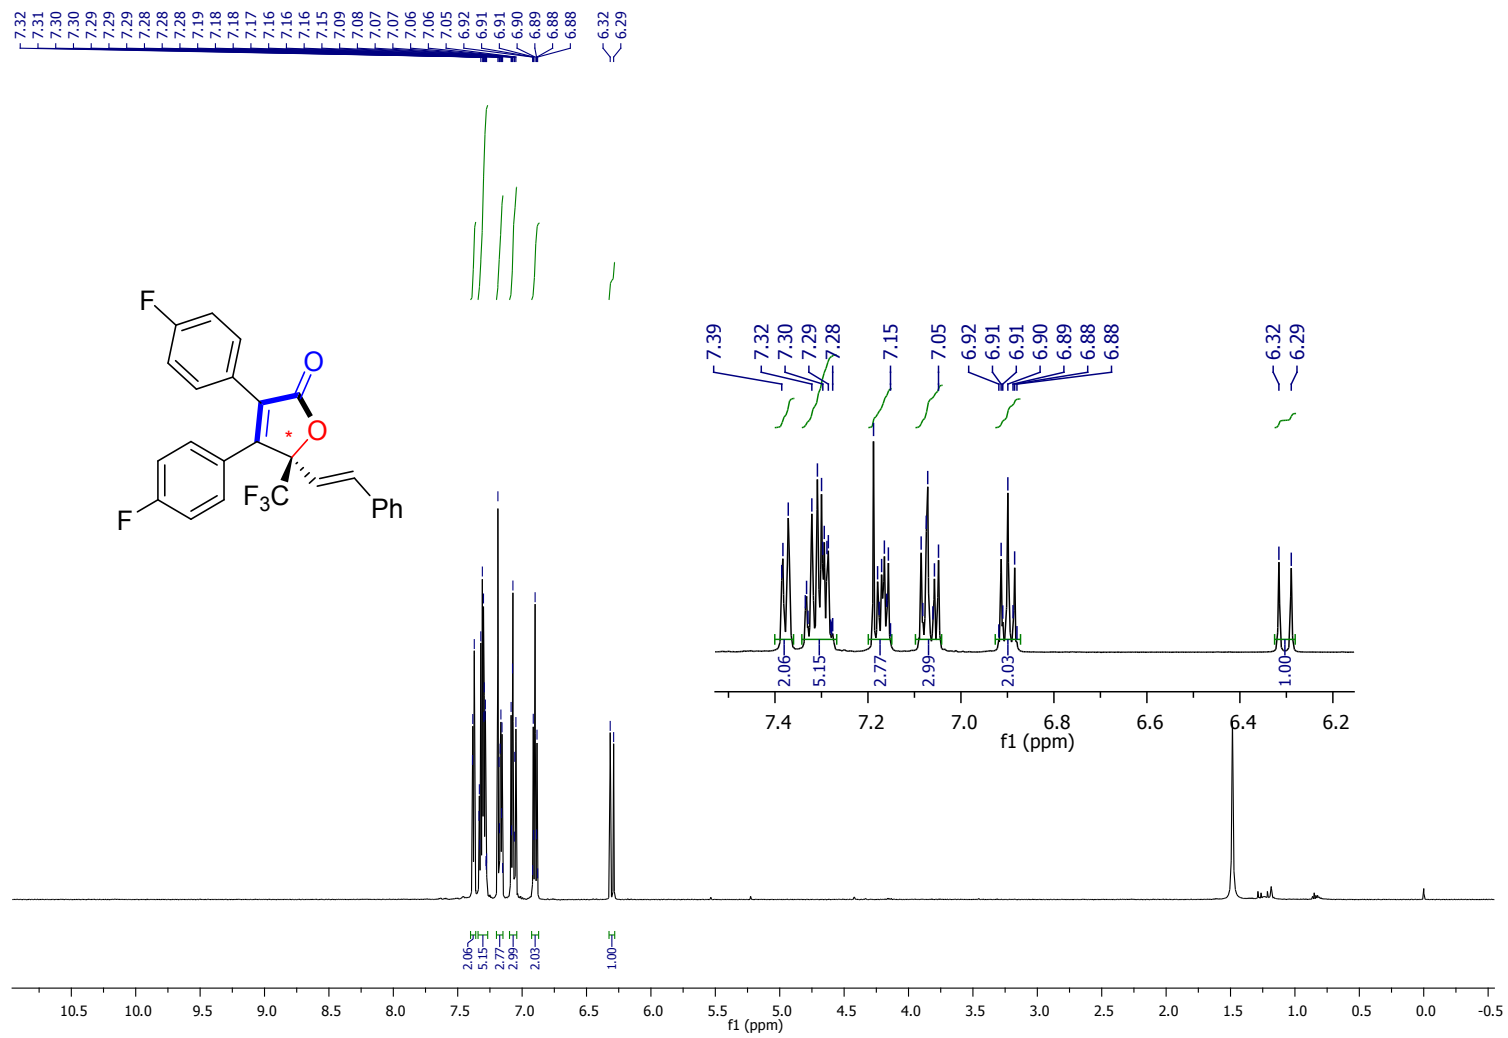

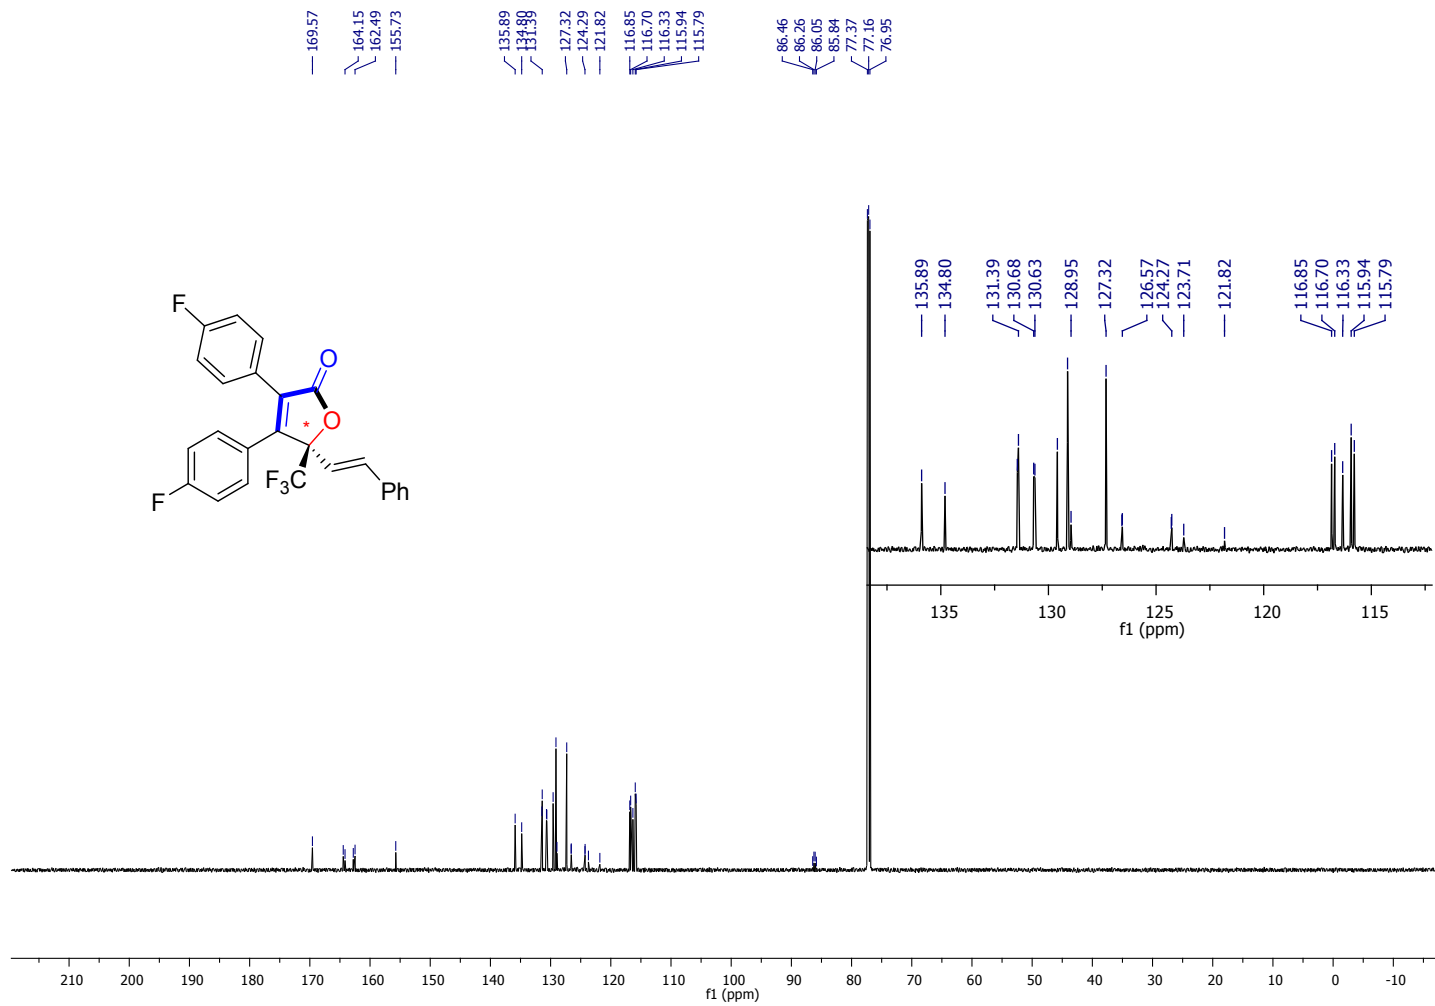

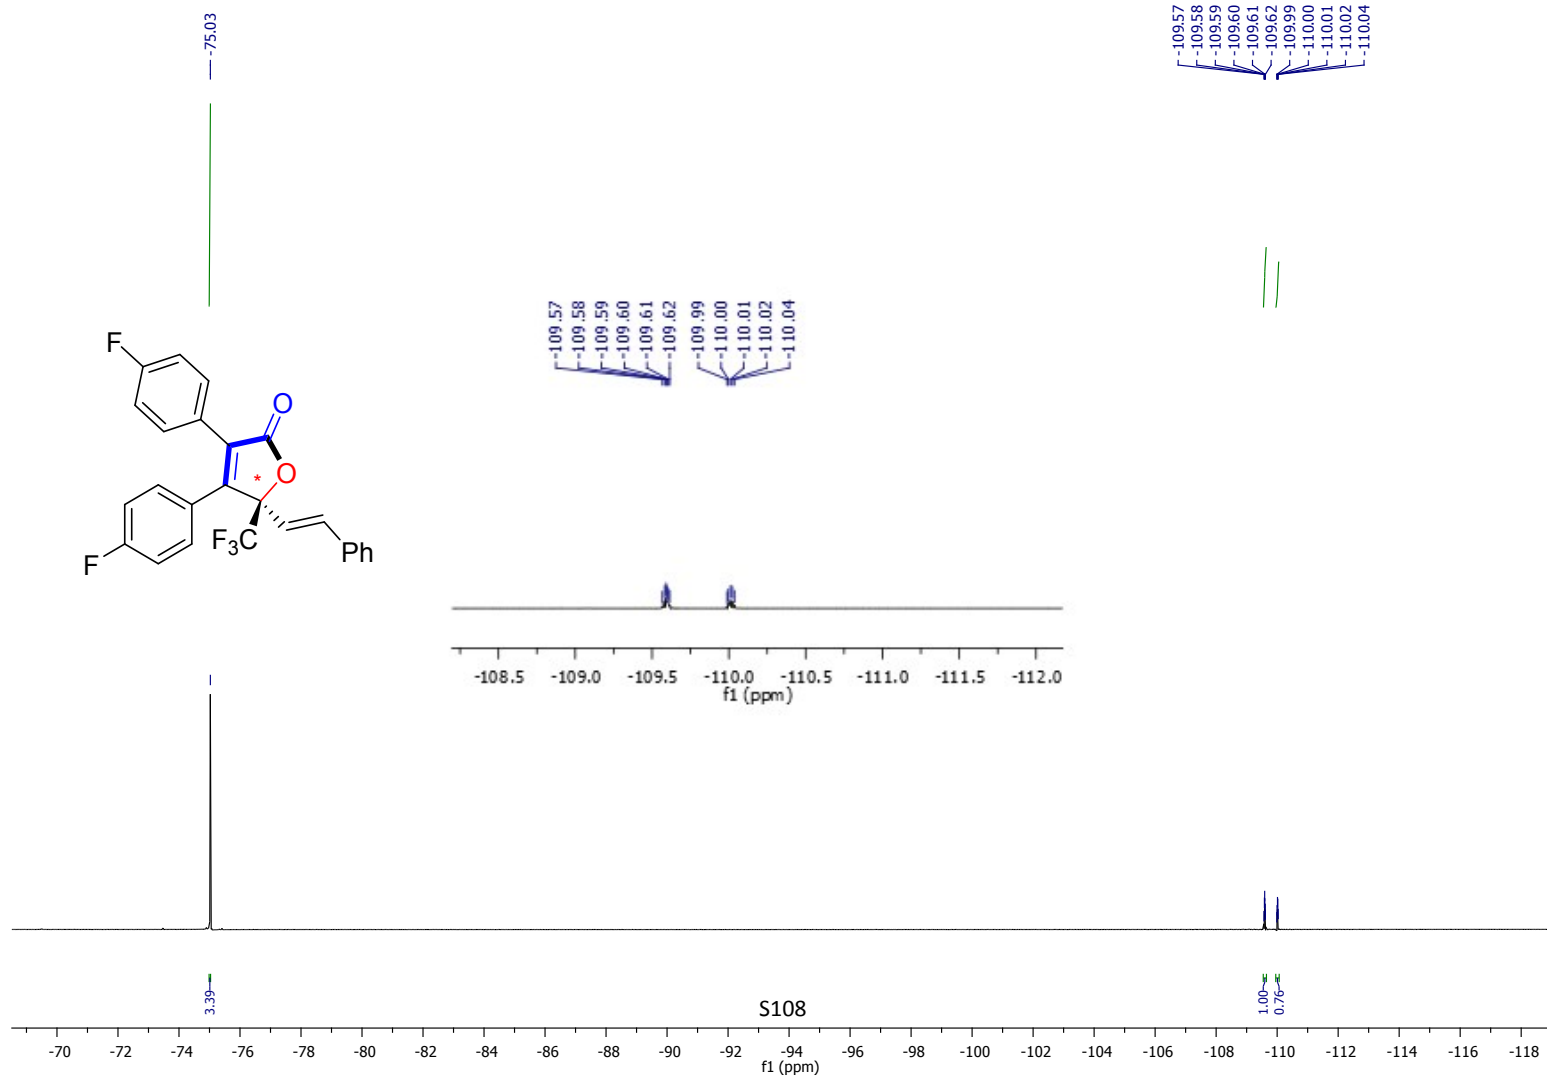

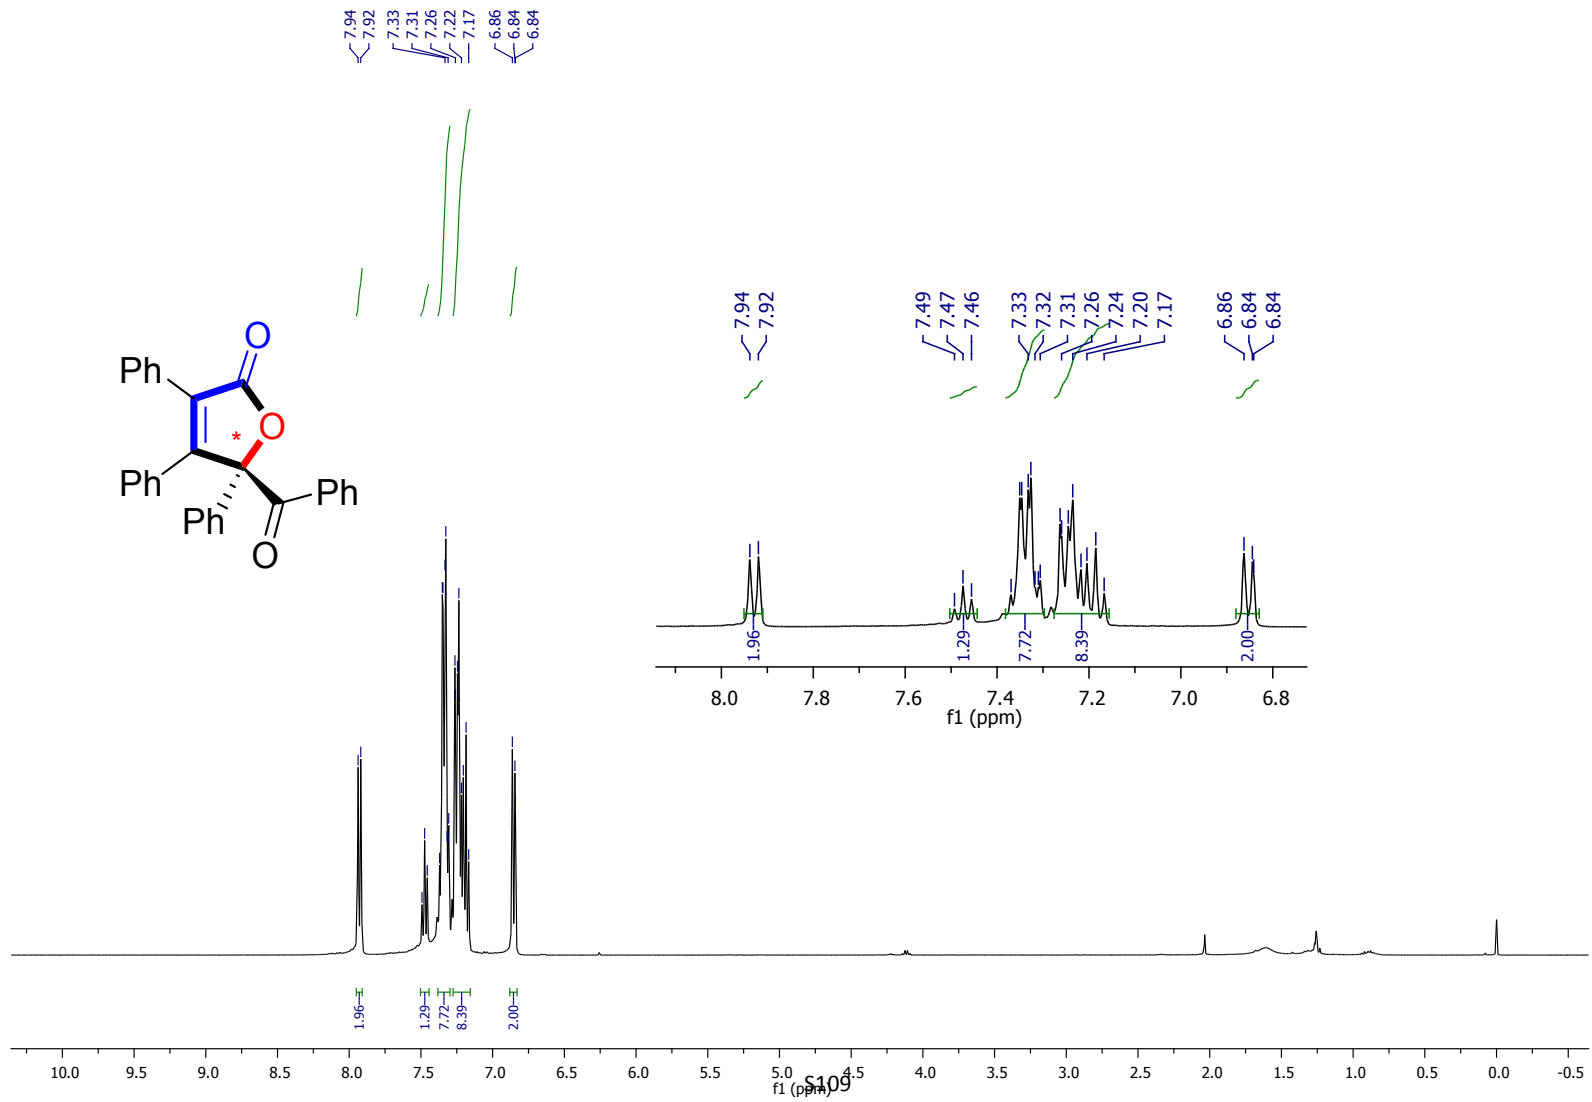

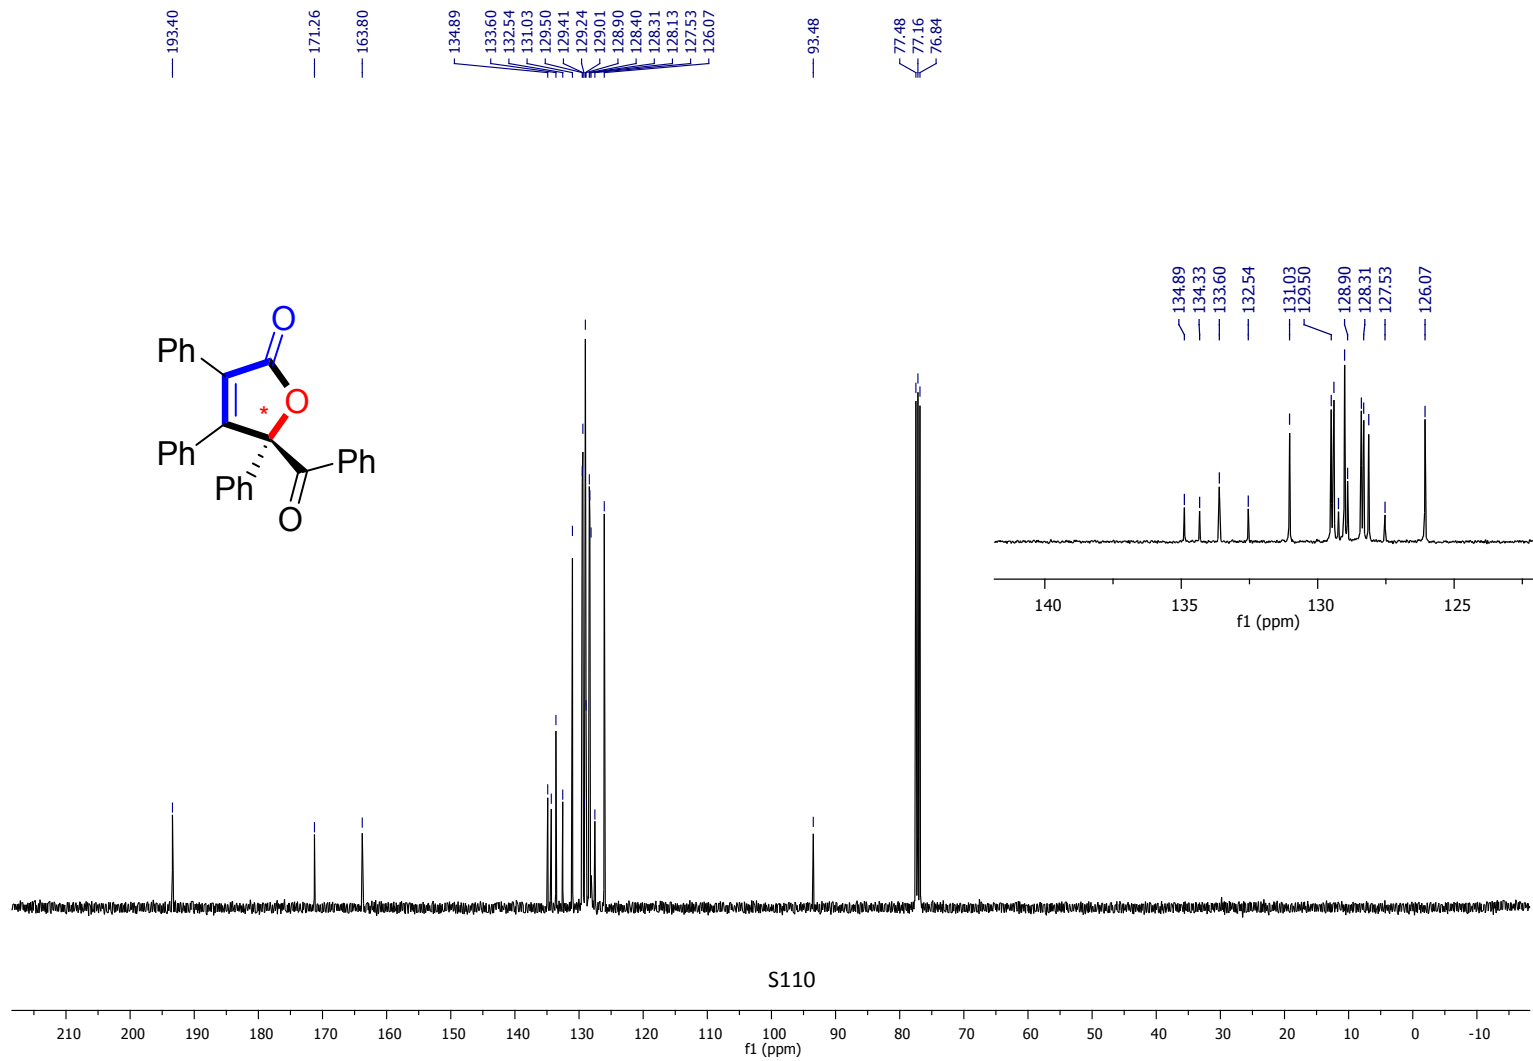

S110

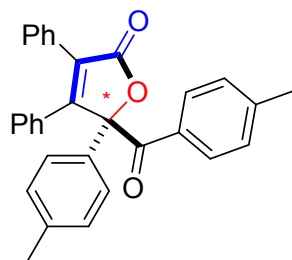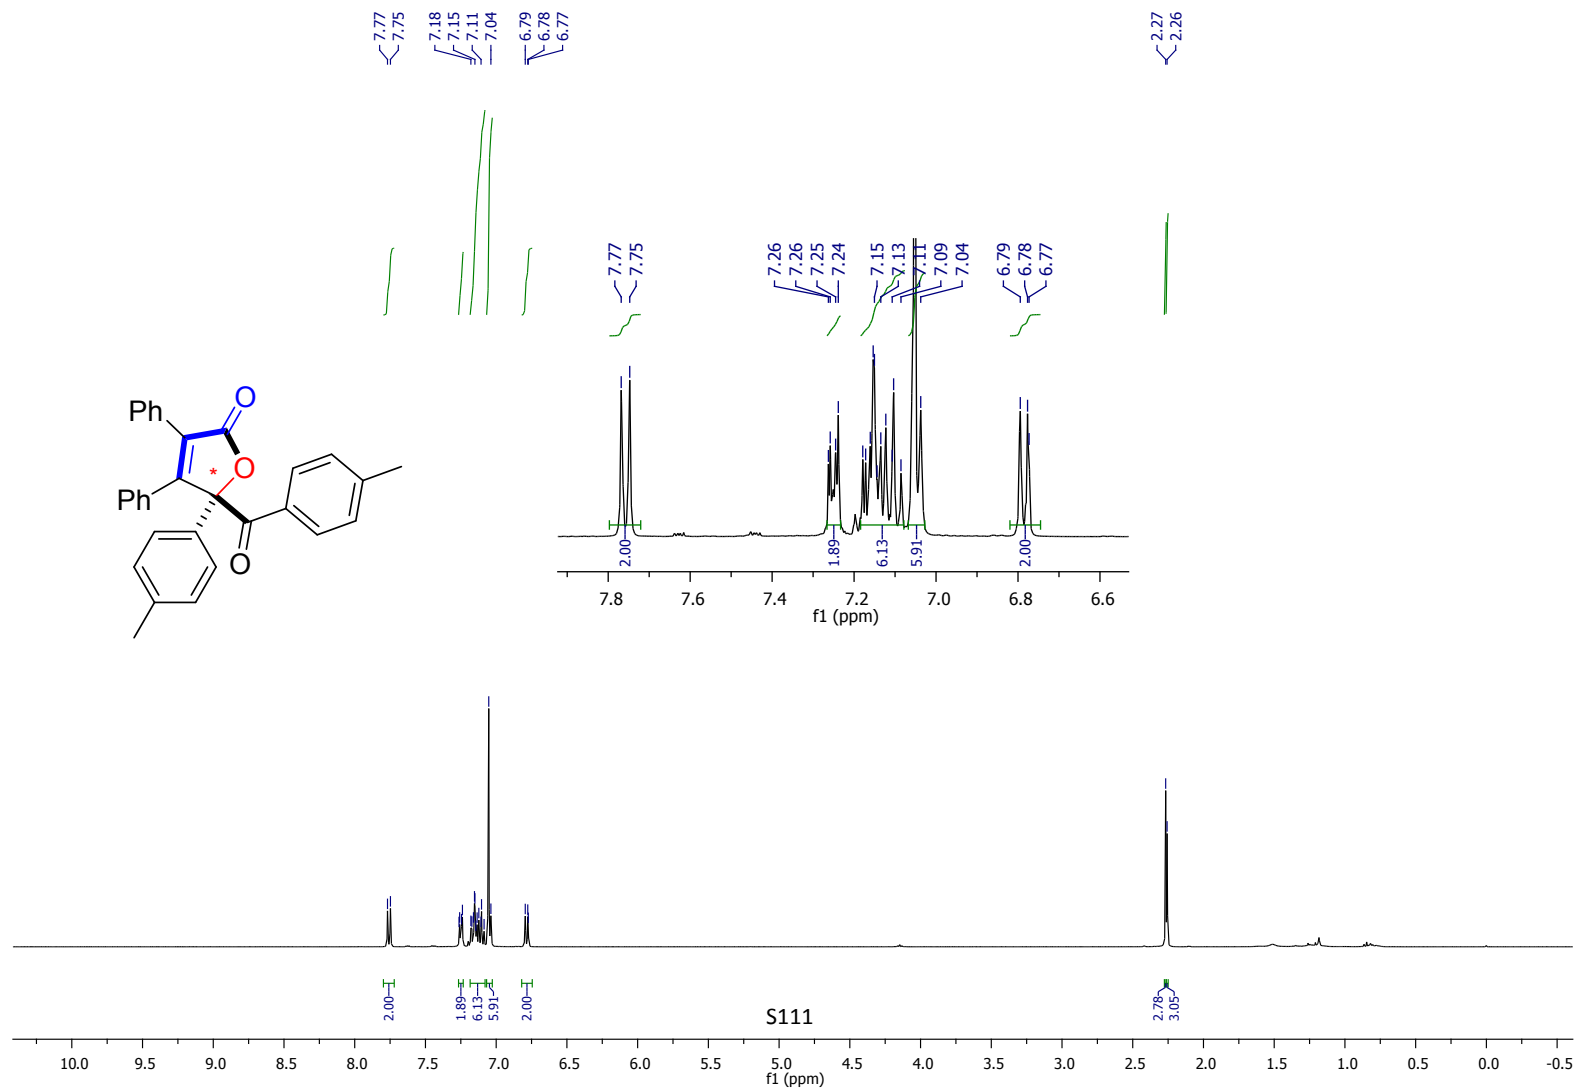

S111

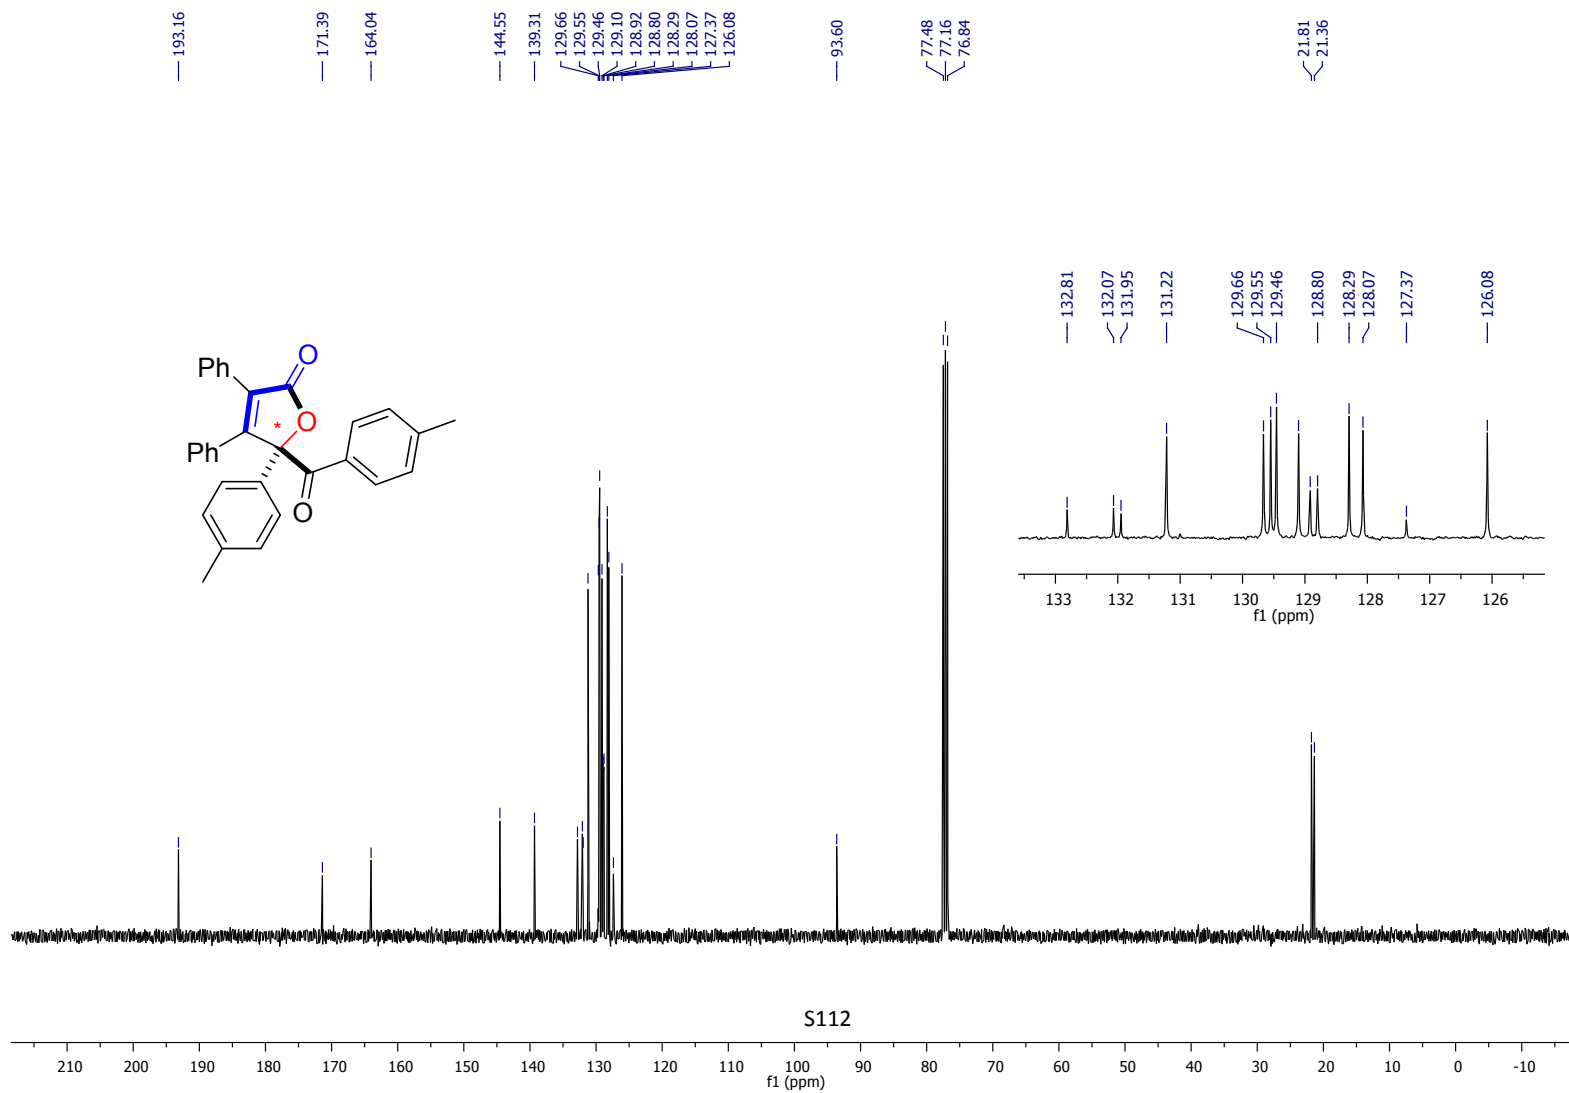



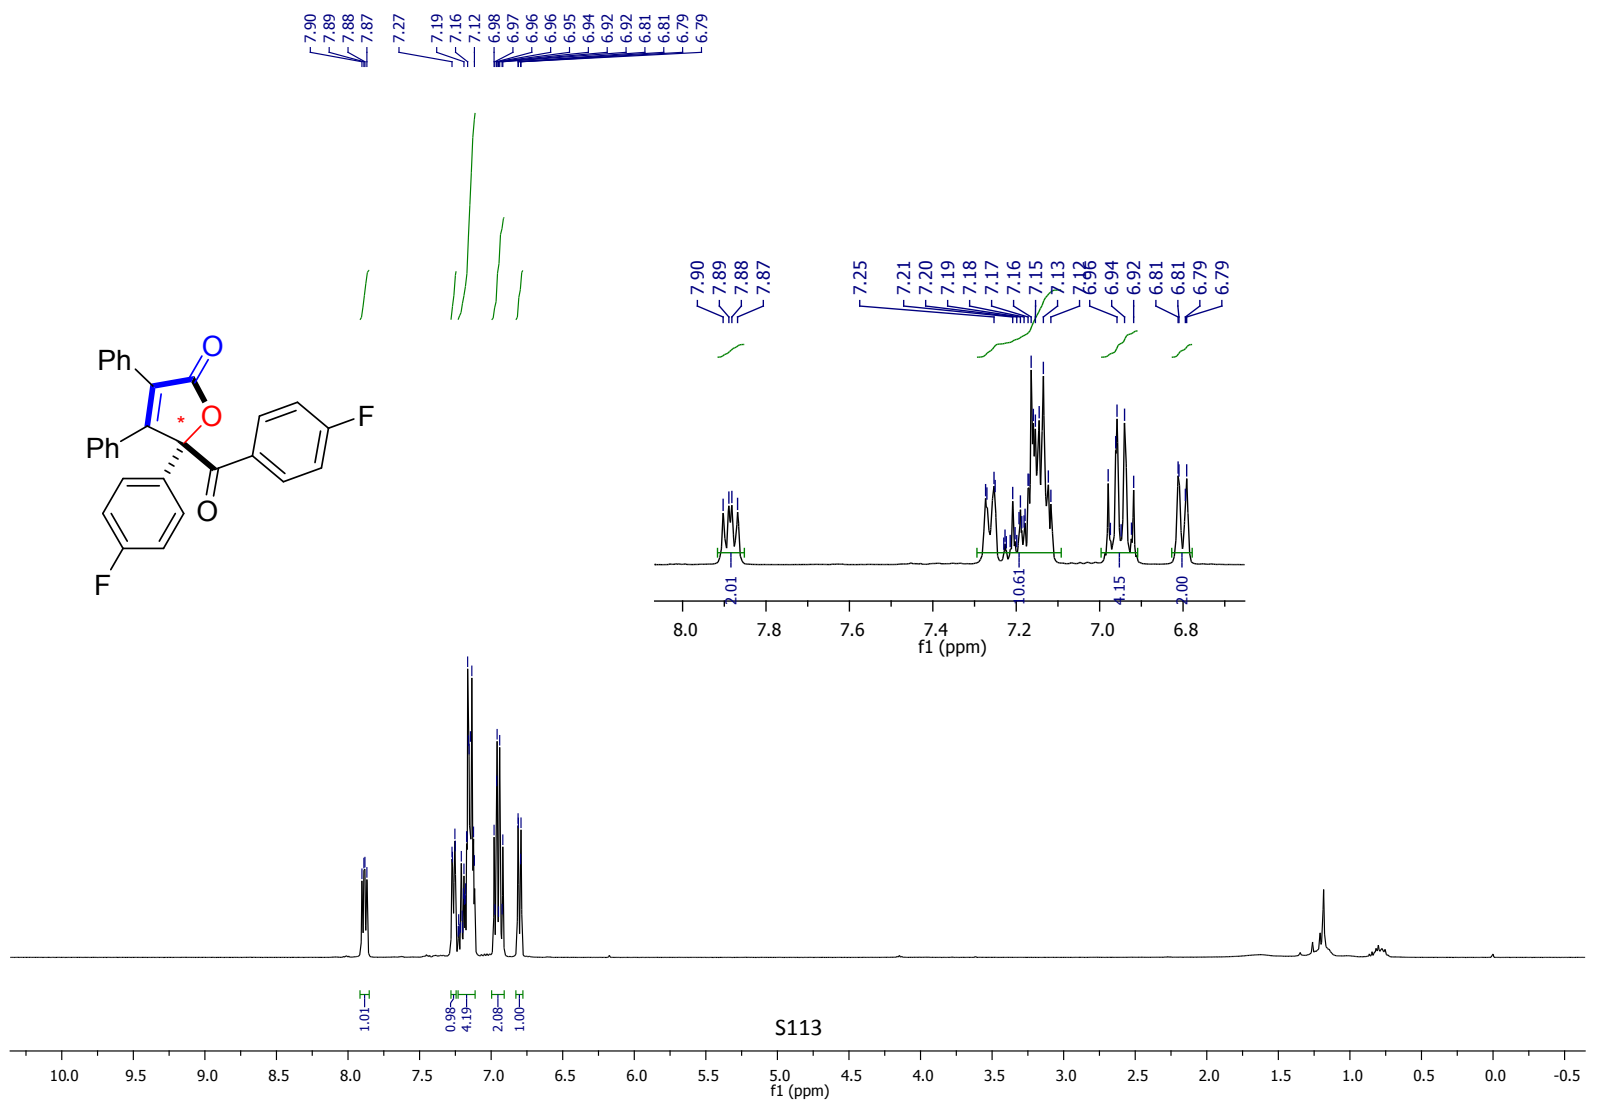

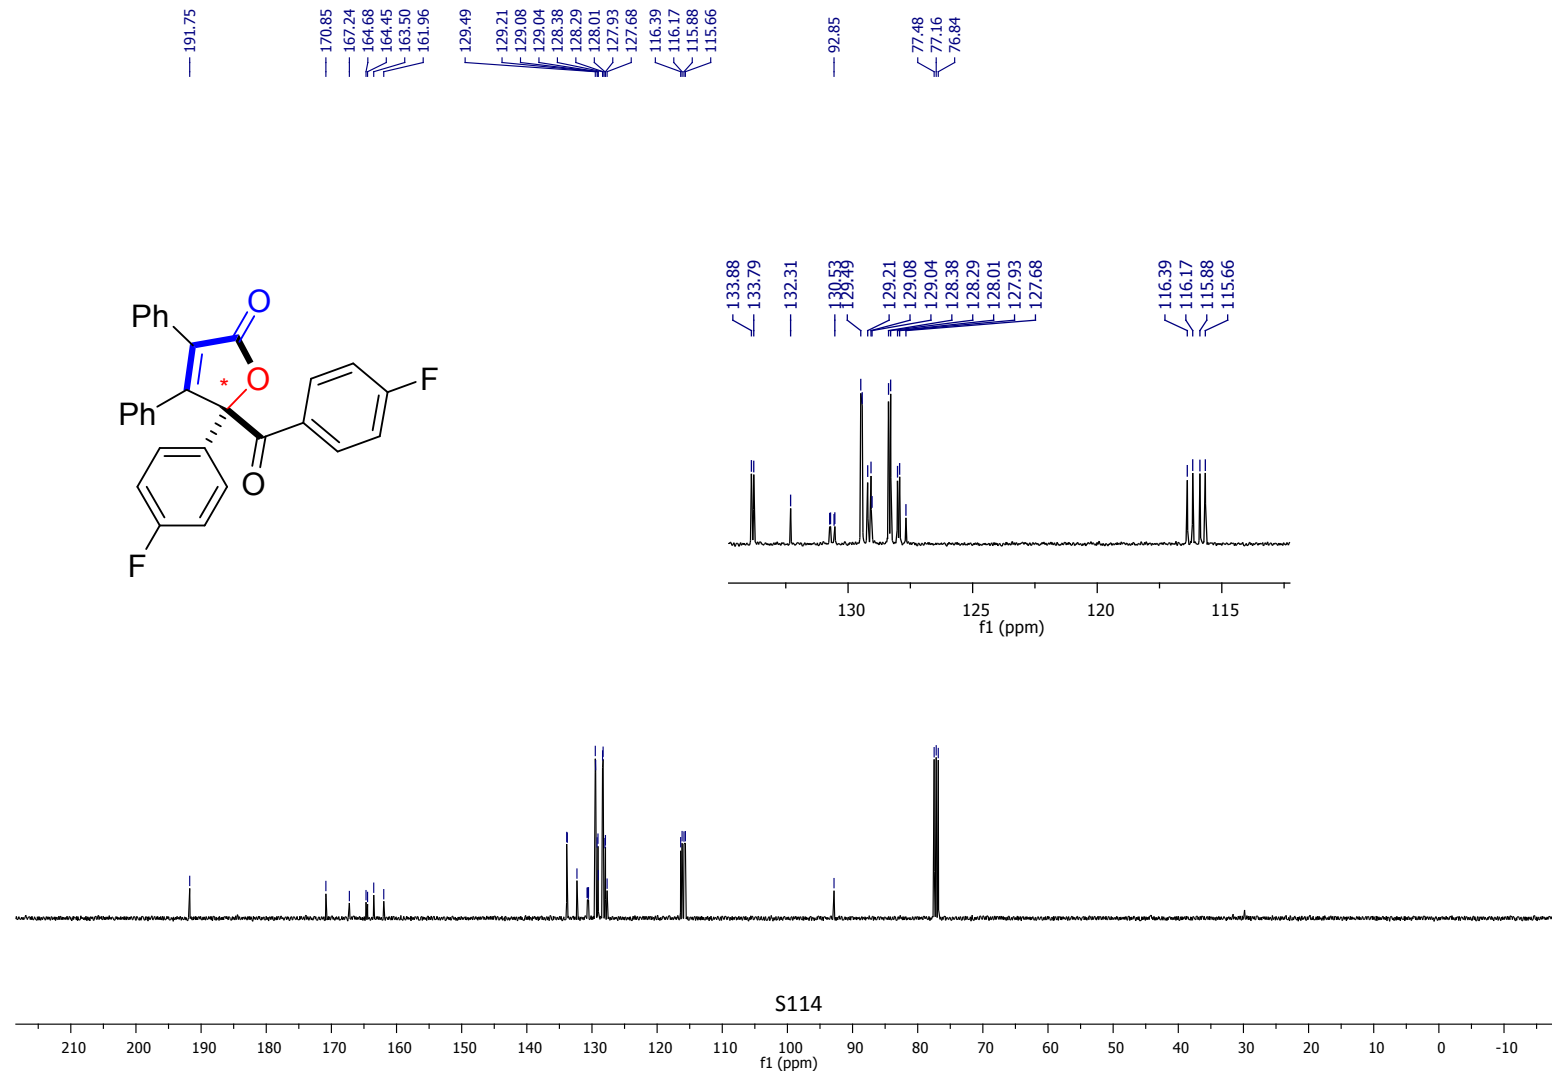

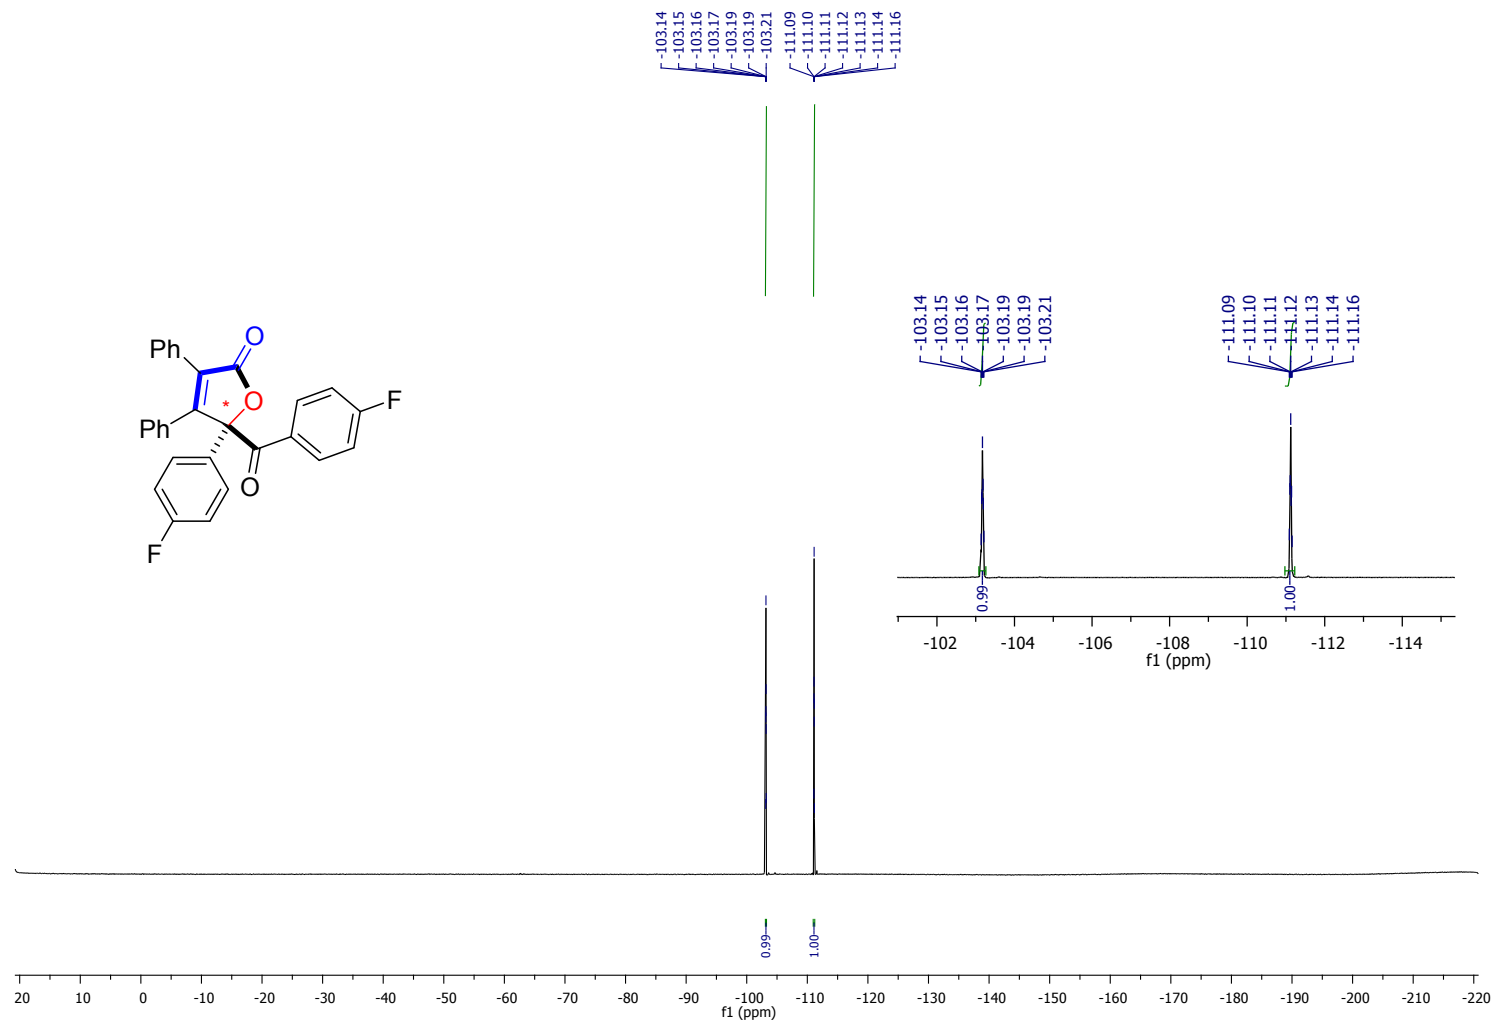

S115

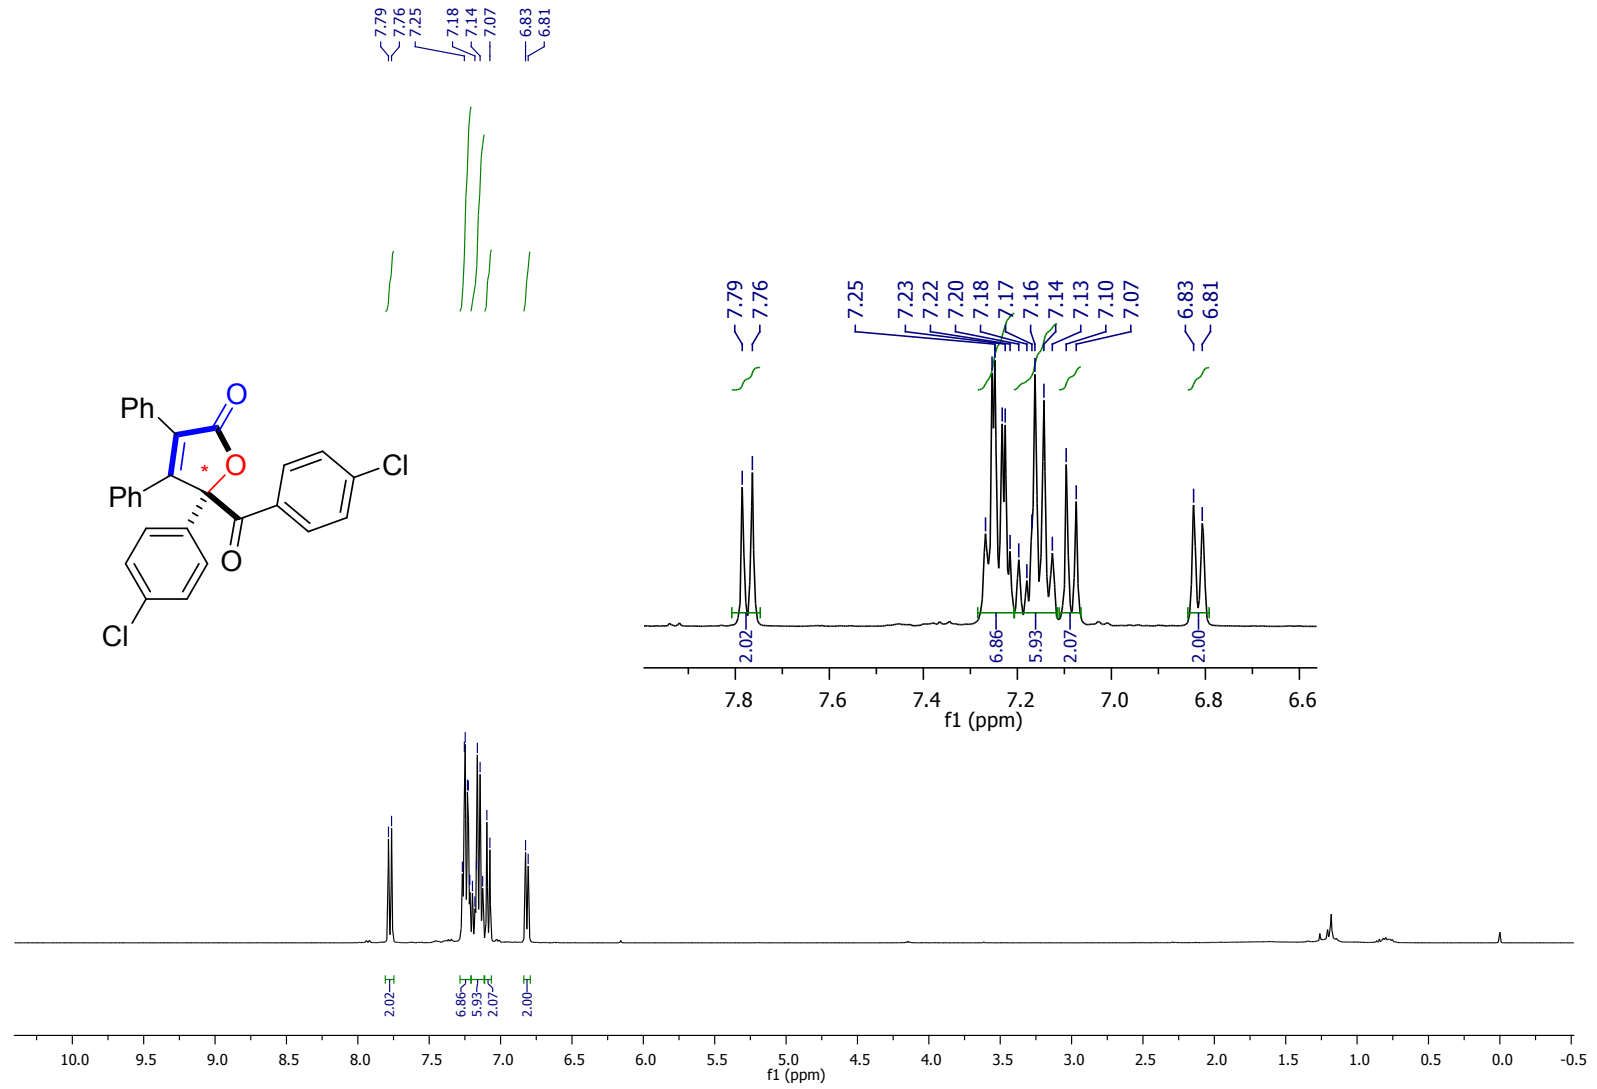

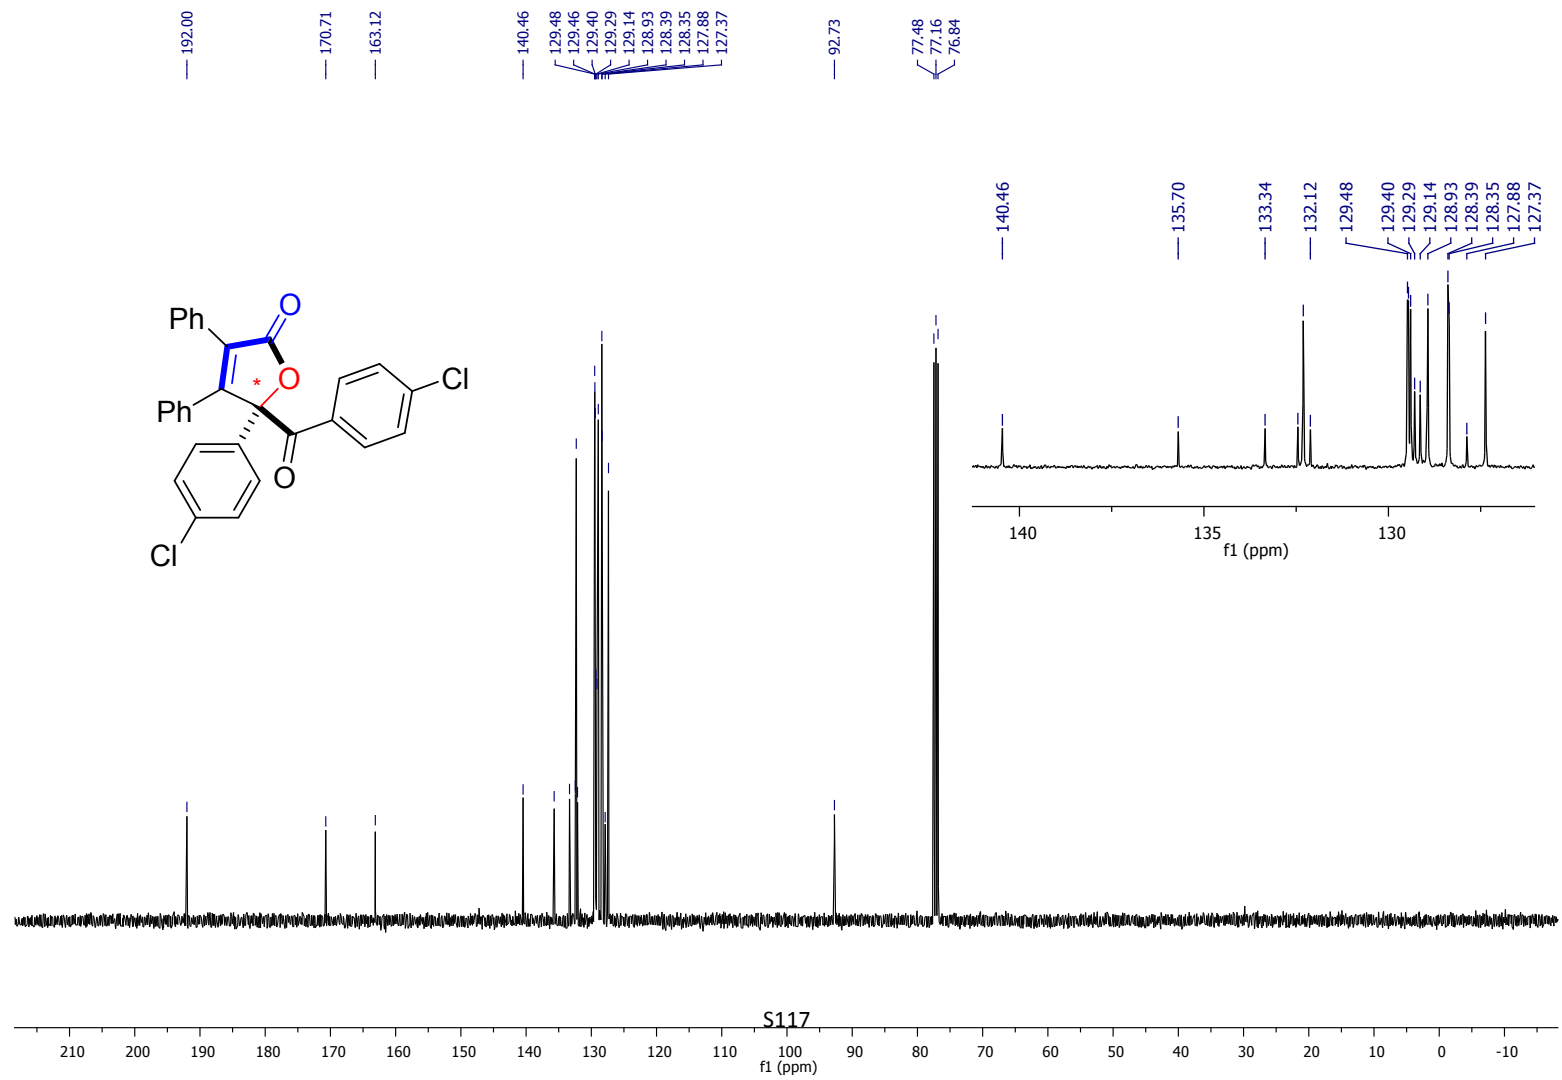

S117

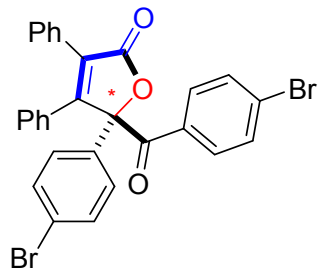

7.70  
7.68  
7.40  
7.20  
7.15  
7.01  
6.83  
6.81  
6.80

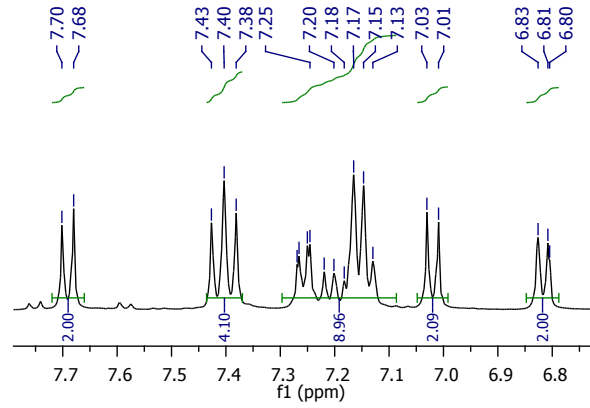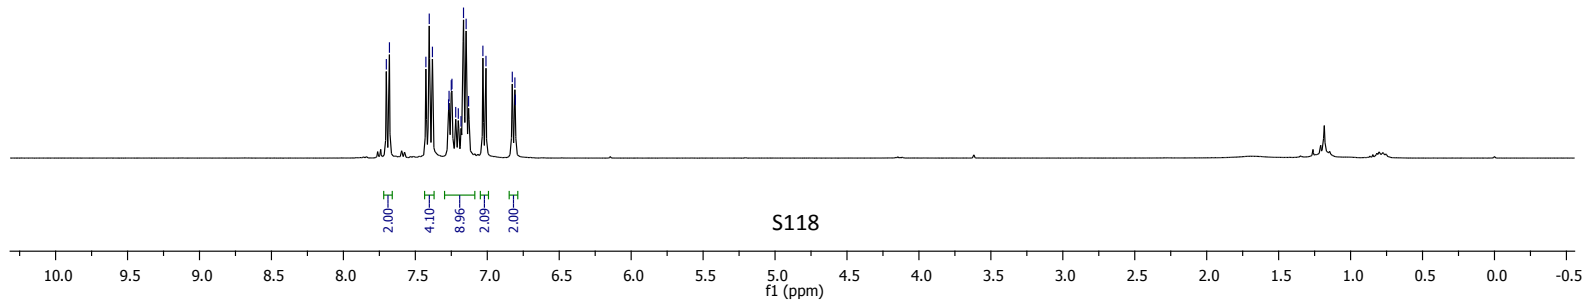

S118

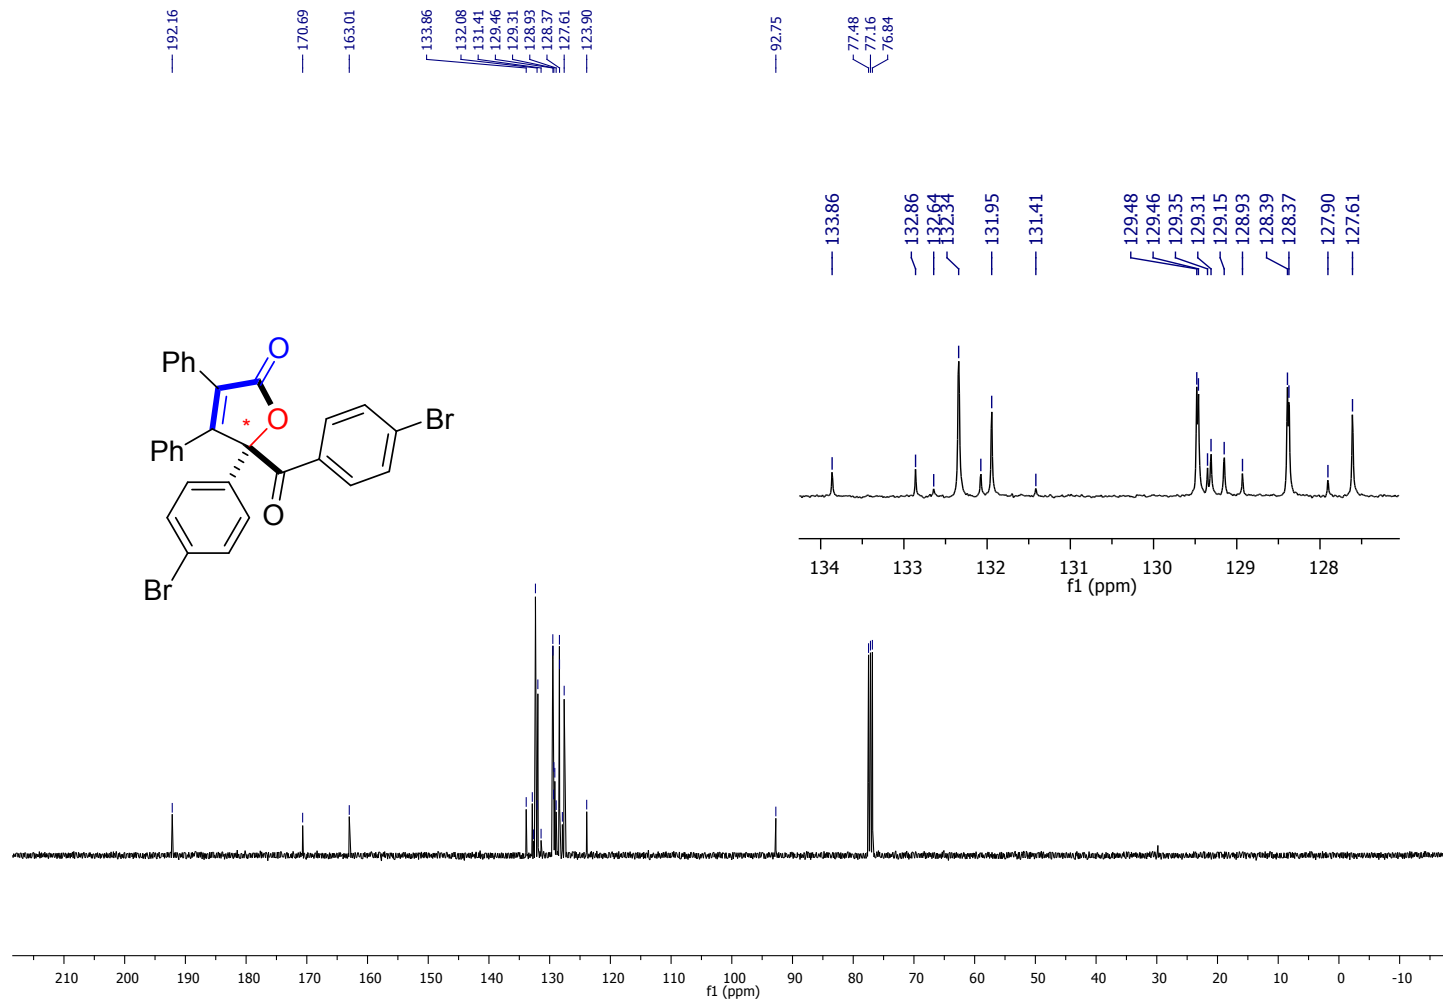

S119

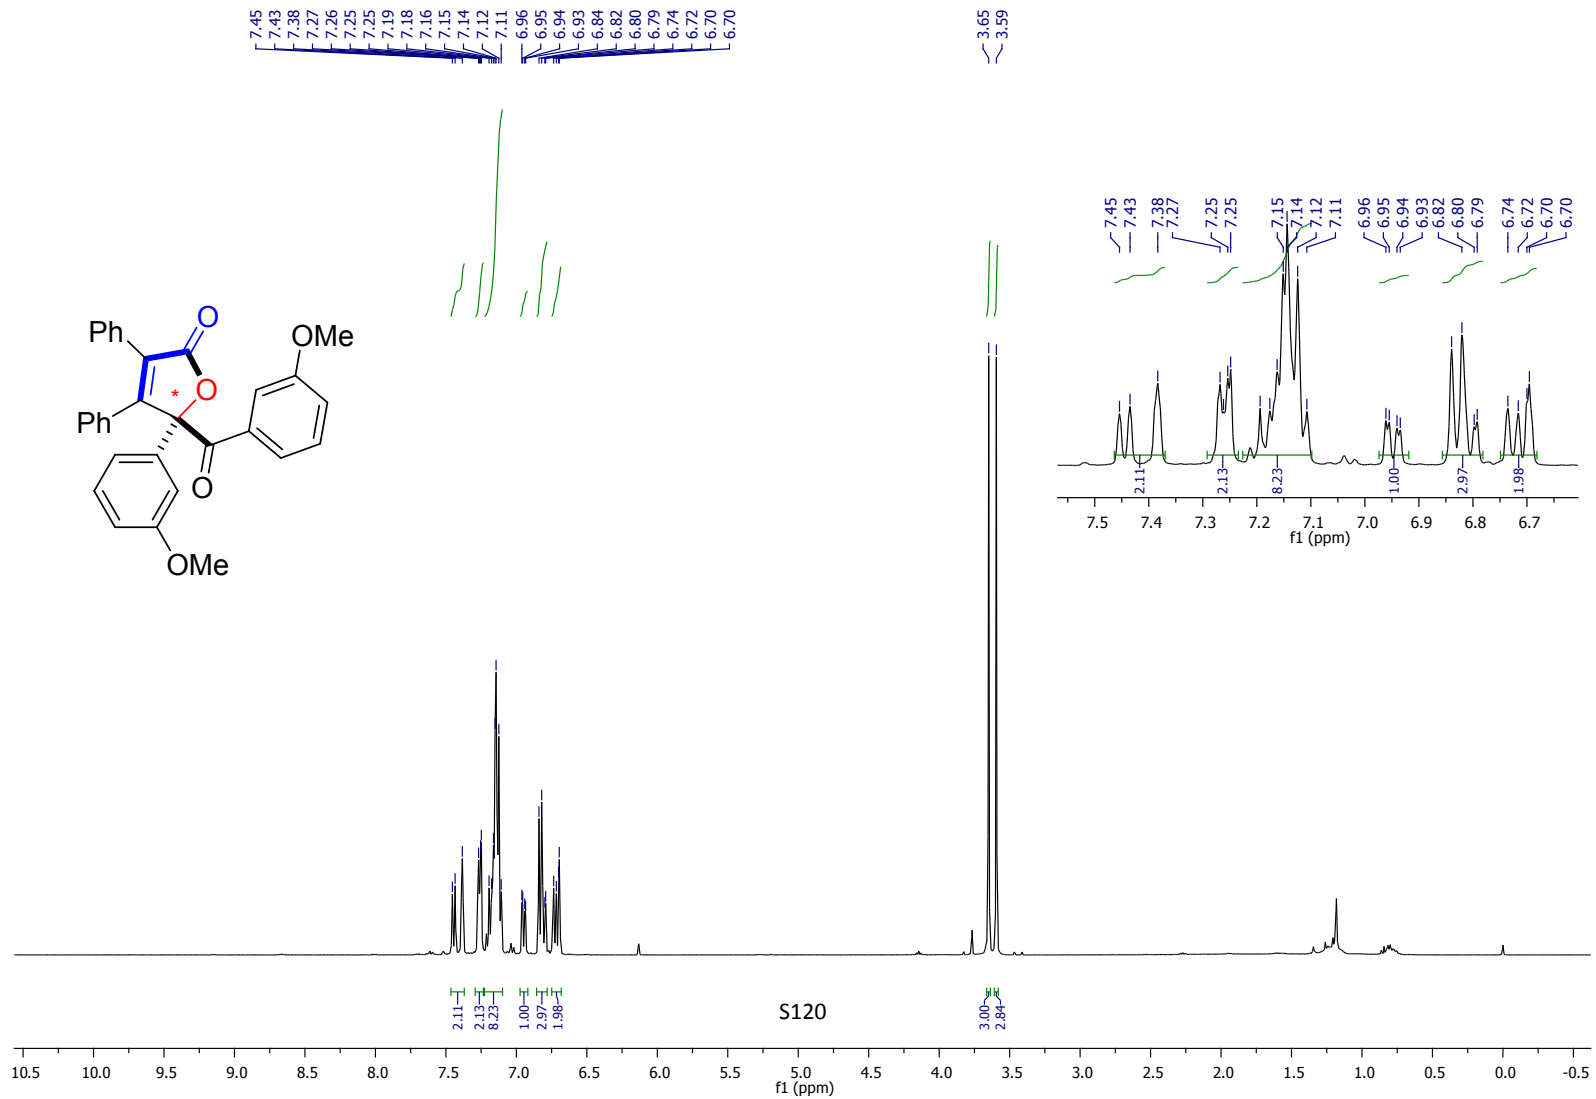



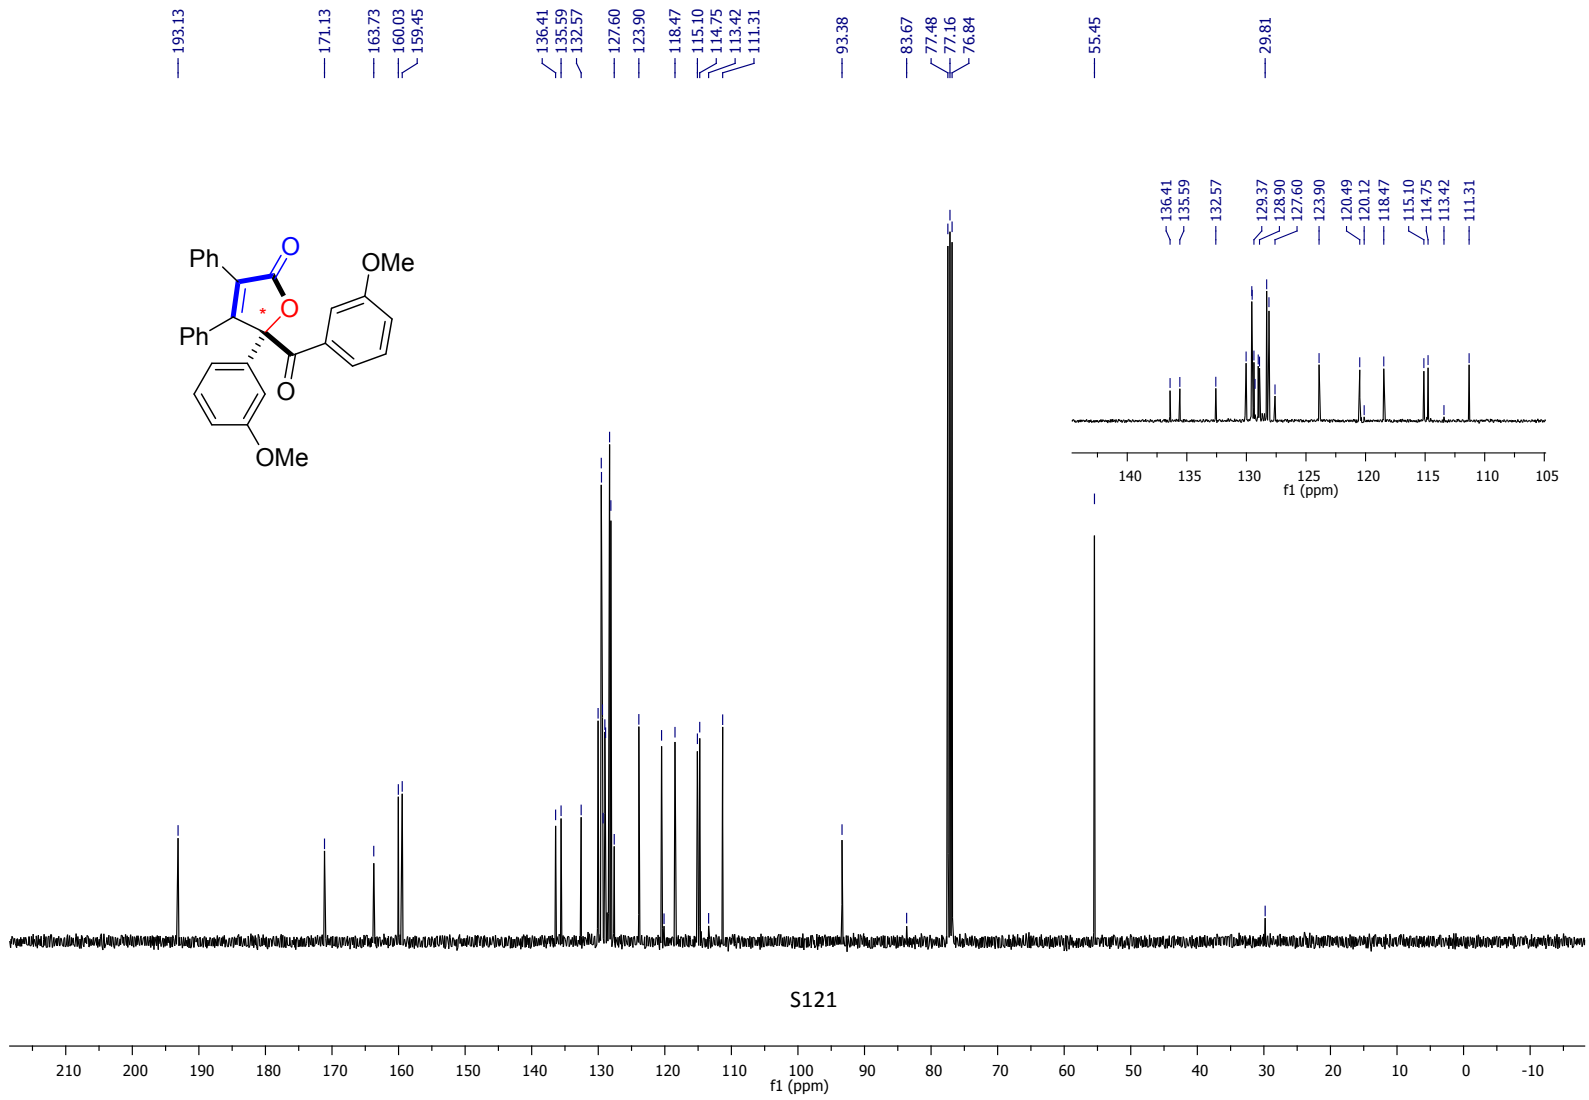

S121

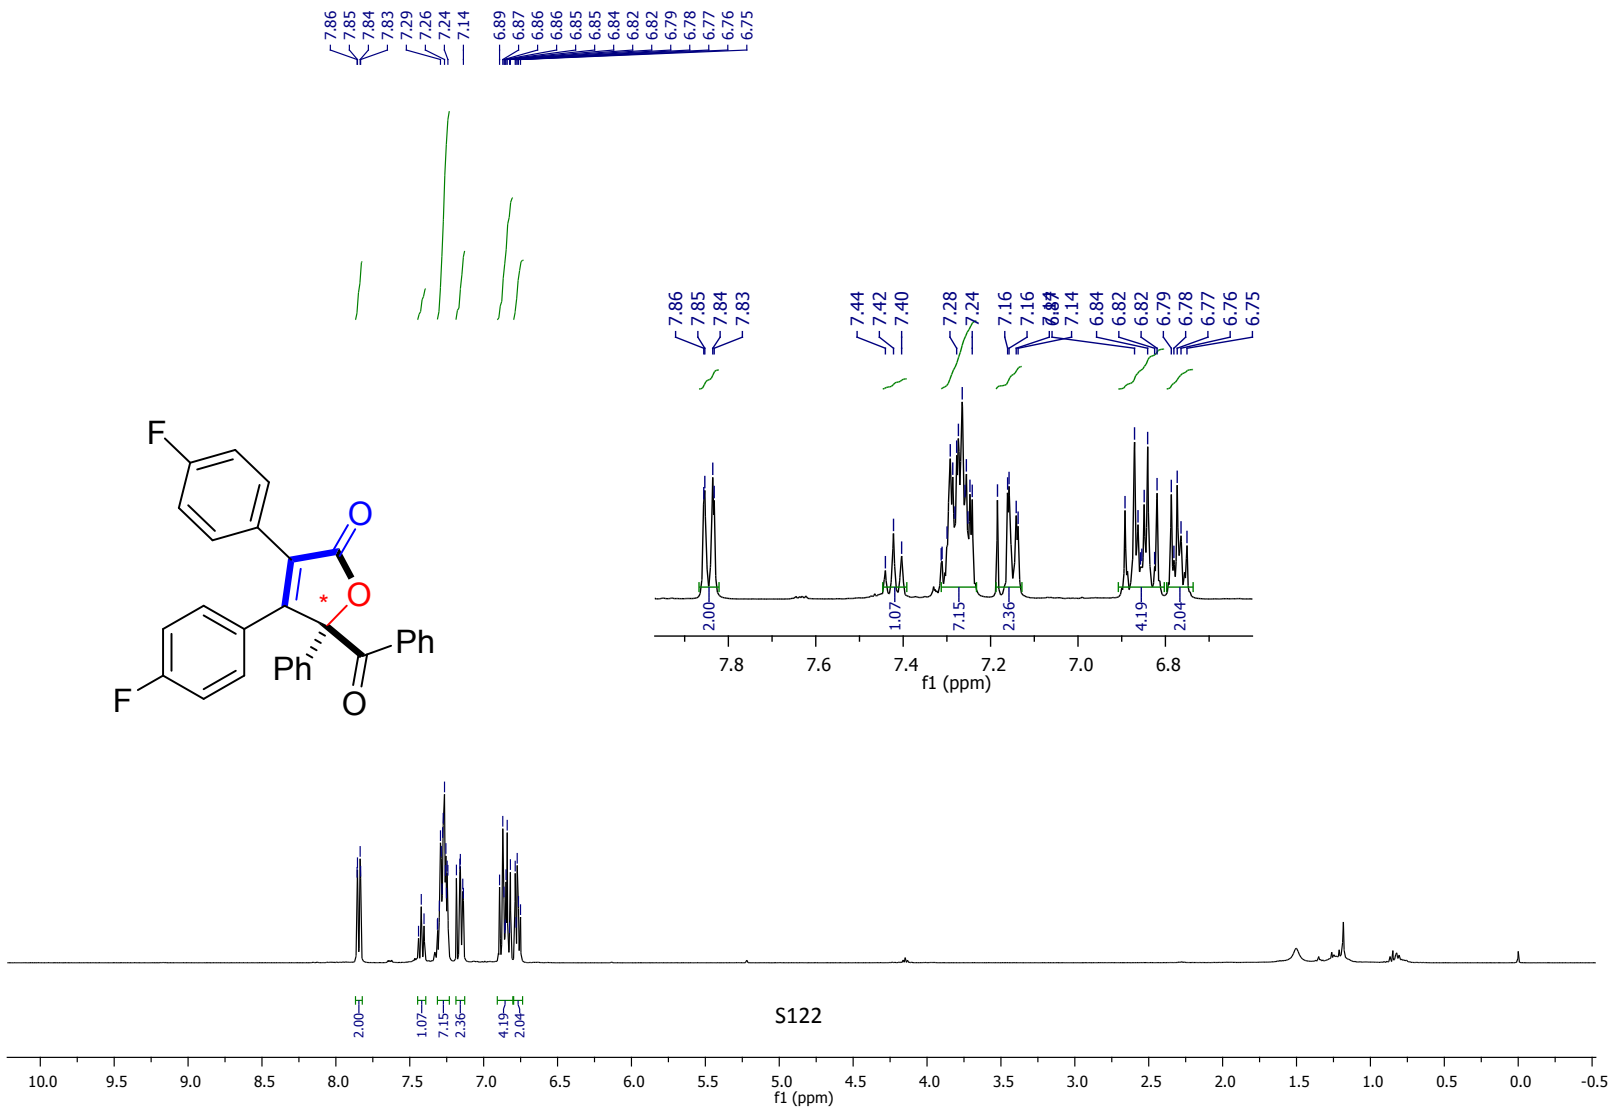

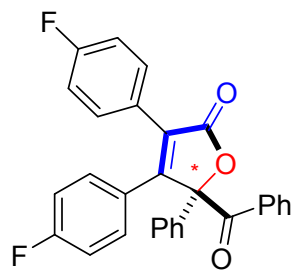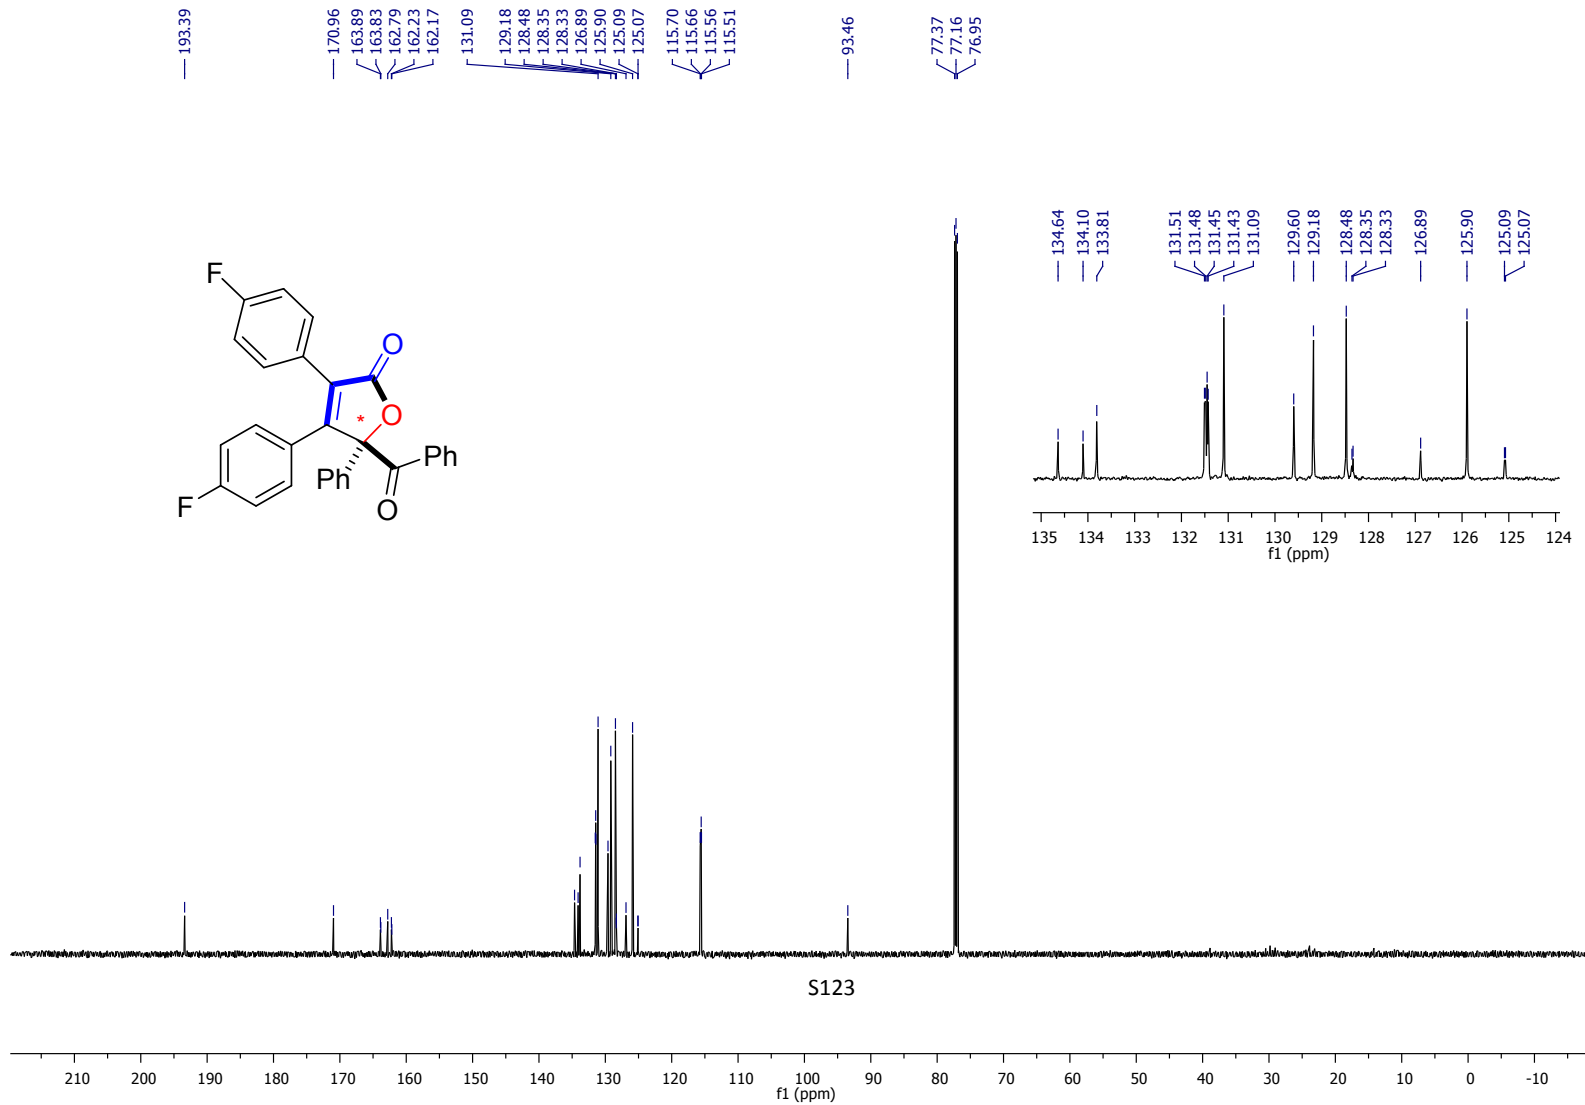

S123

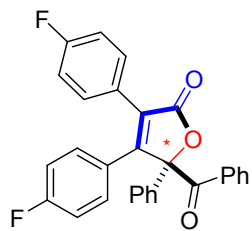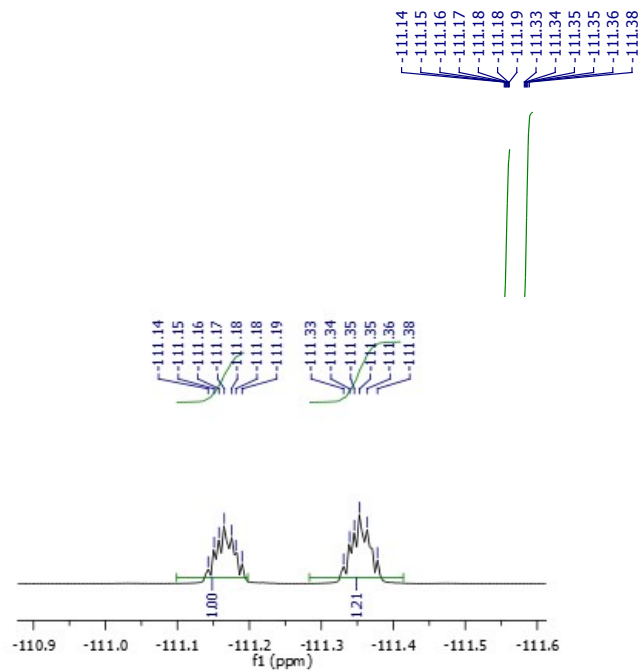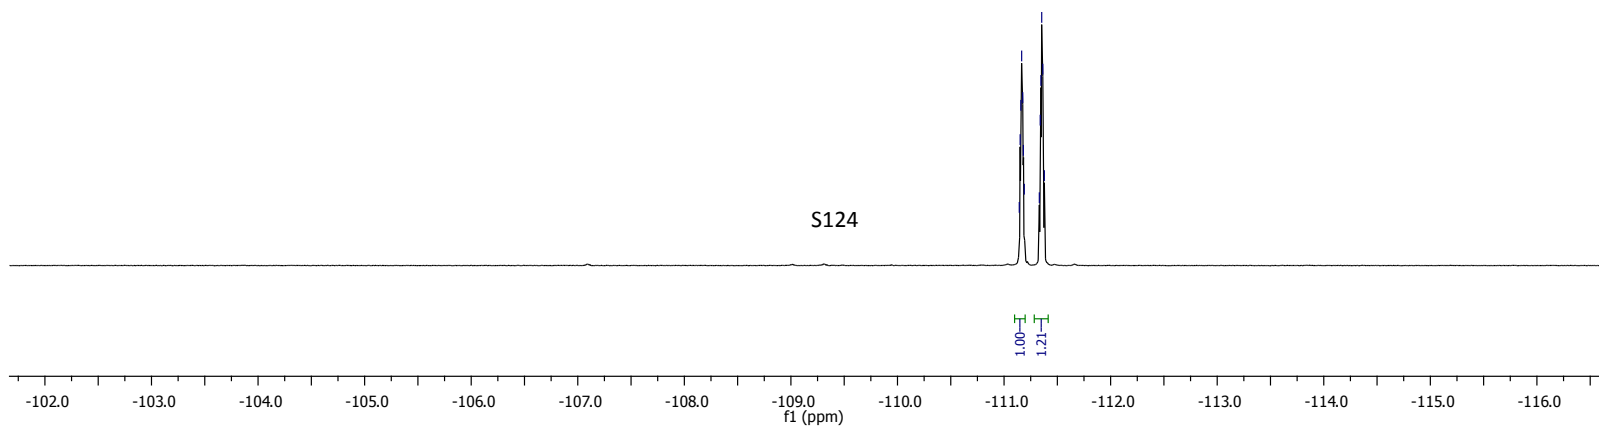

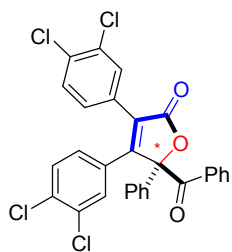

7.86  
7.86  
7.84  
7.84  
7.83  
7.30  
7.19  
7.14  
7.08  
6.74  
6.74  
6.67  
6.66  
6.66  
6.65  
6.64  
6.64

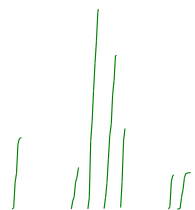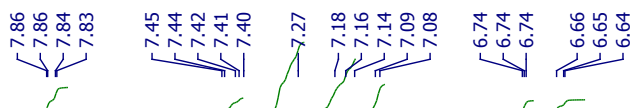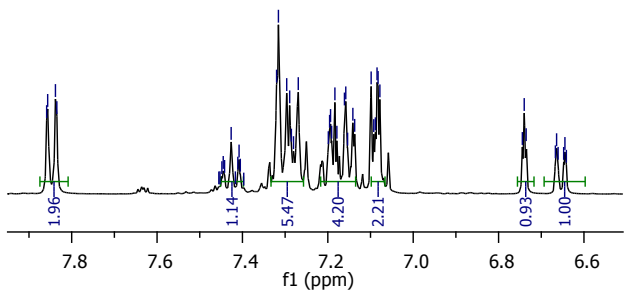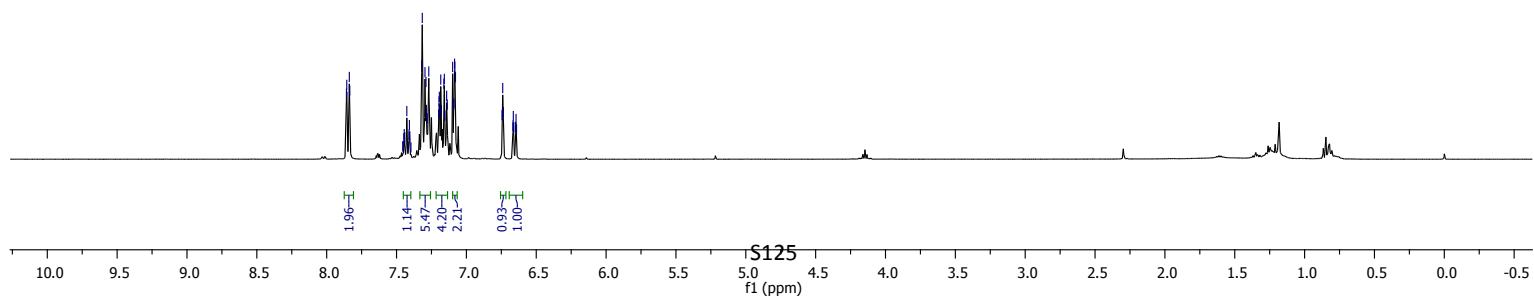

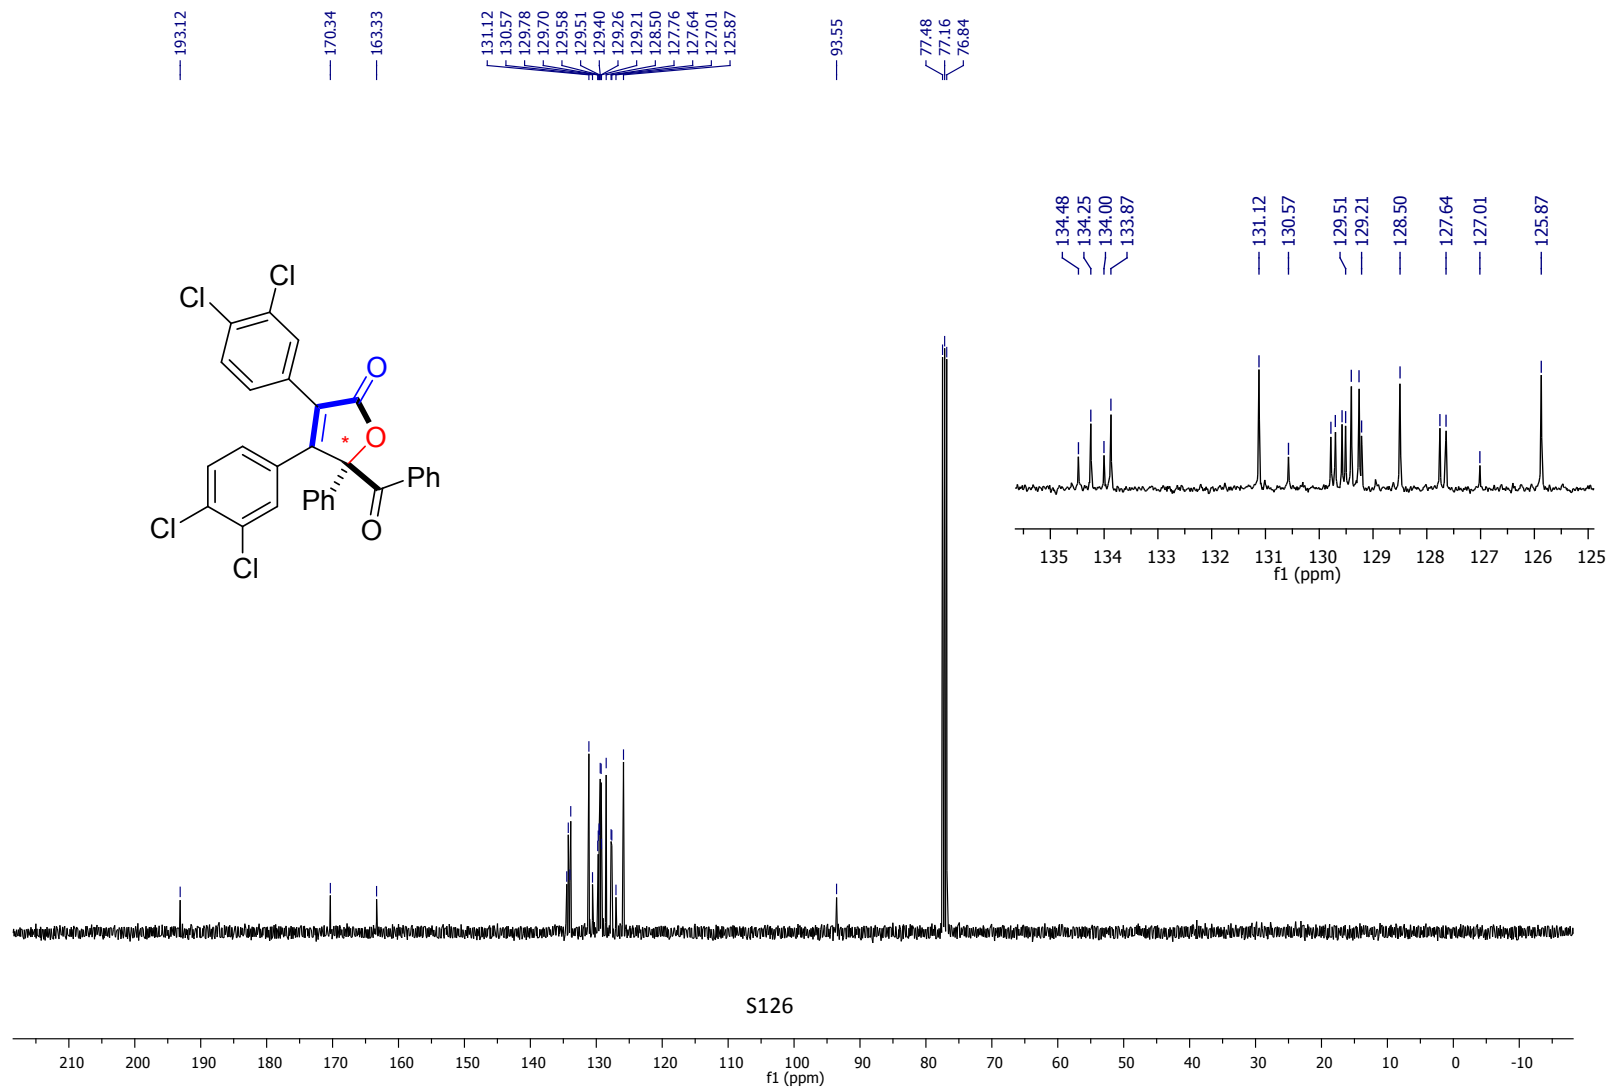

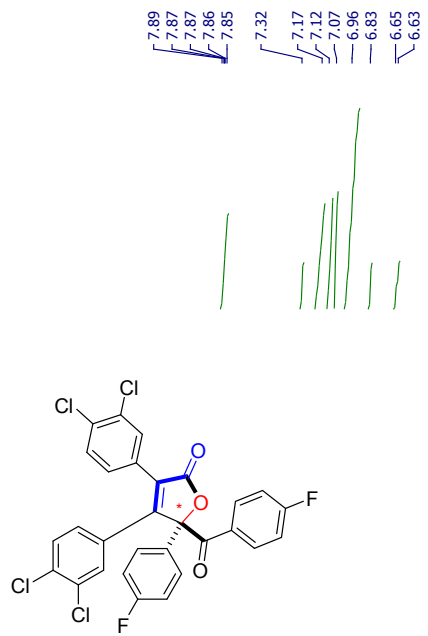

7.89  
7.87  
7.87  
7.86  
7.85  
7.32  
7.17  
7.12  
7.07  
6.96  
6.83  
6.65  
6.63

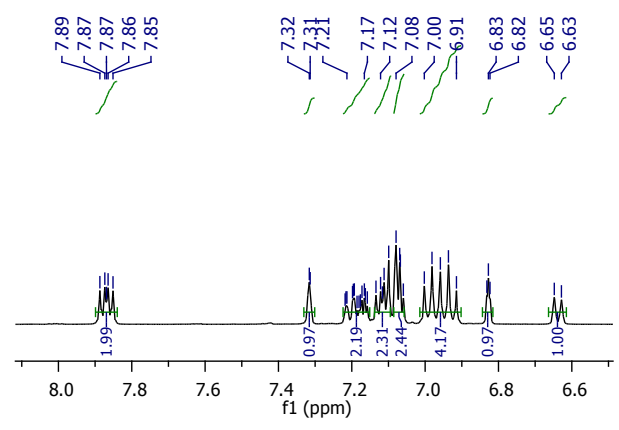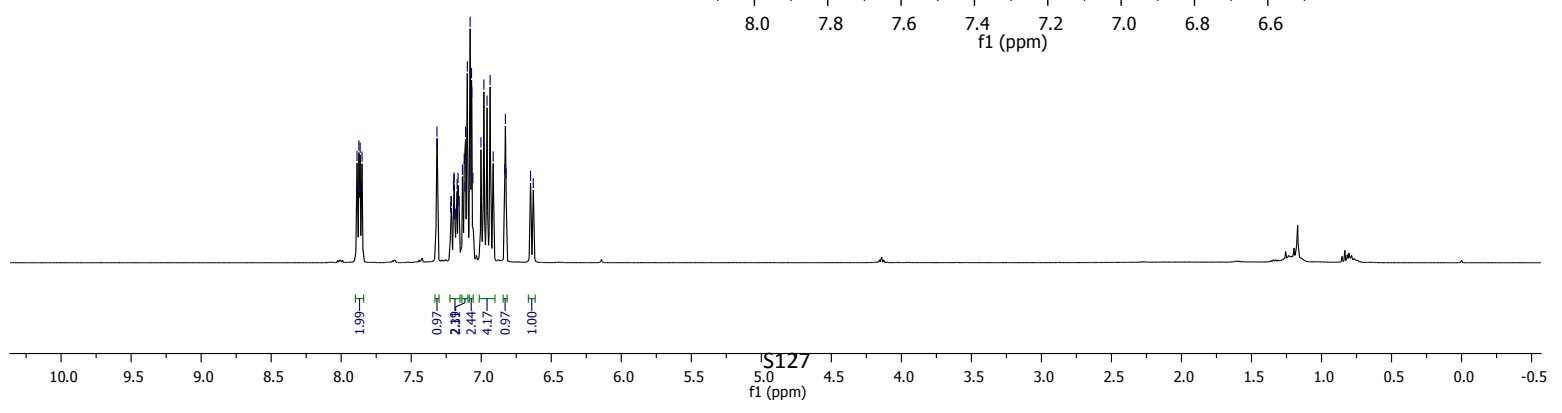

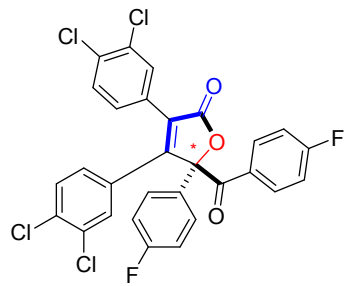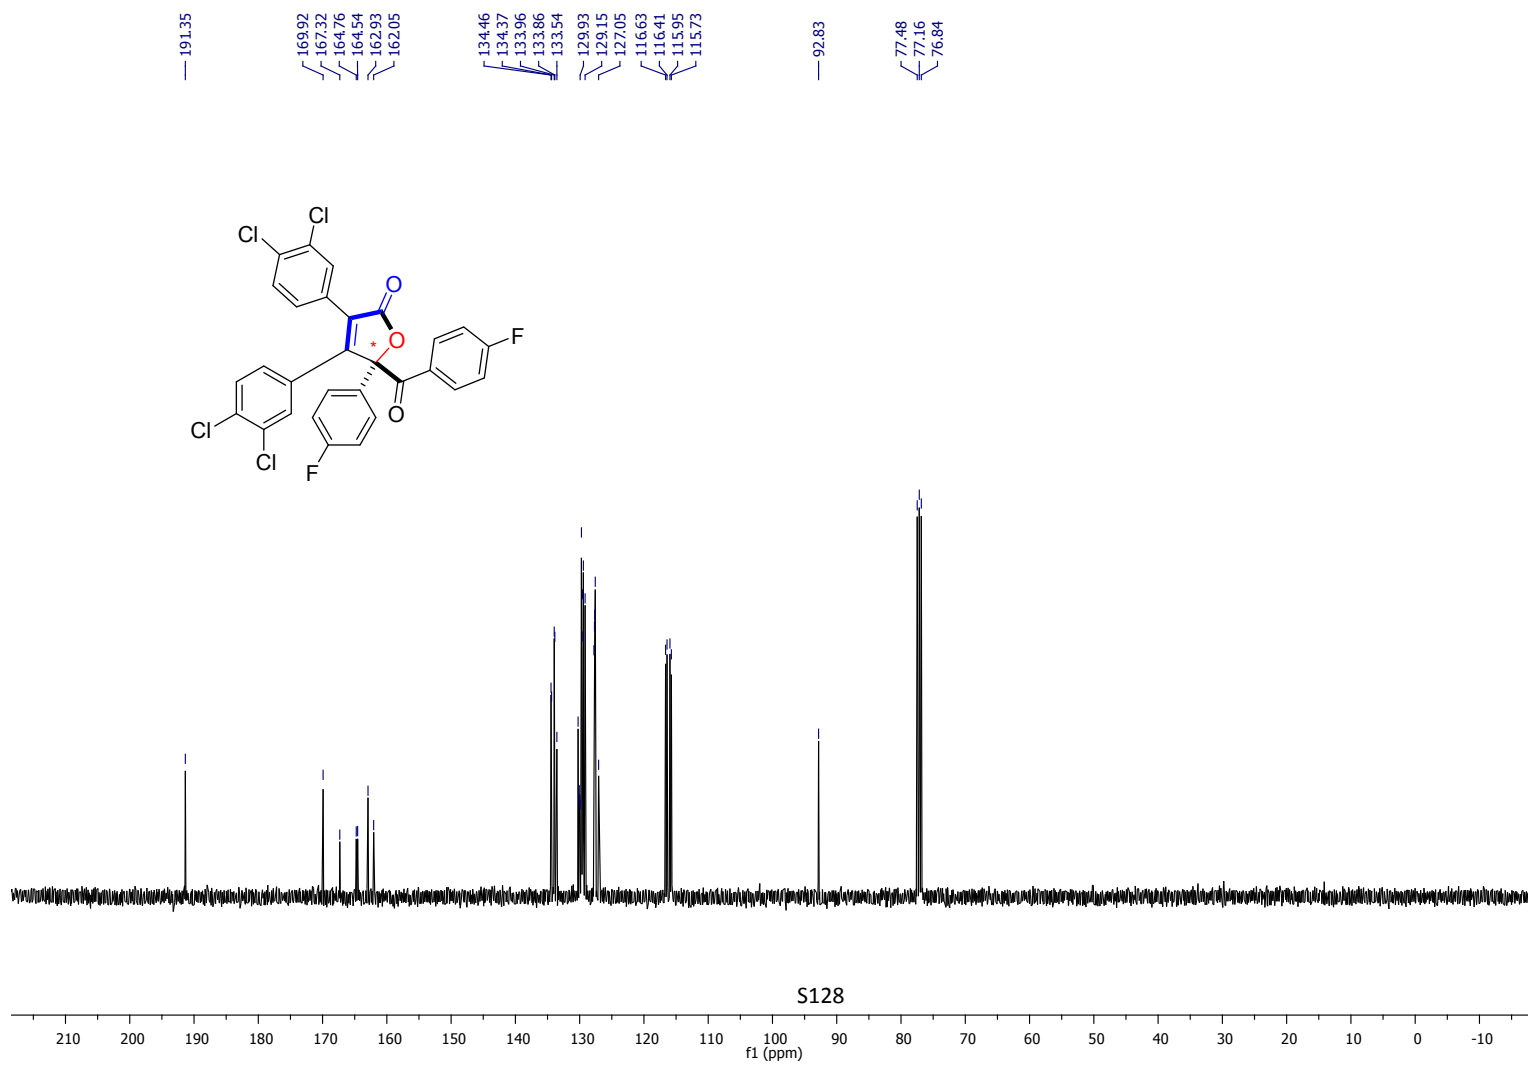

S128



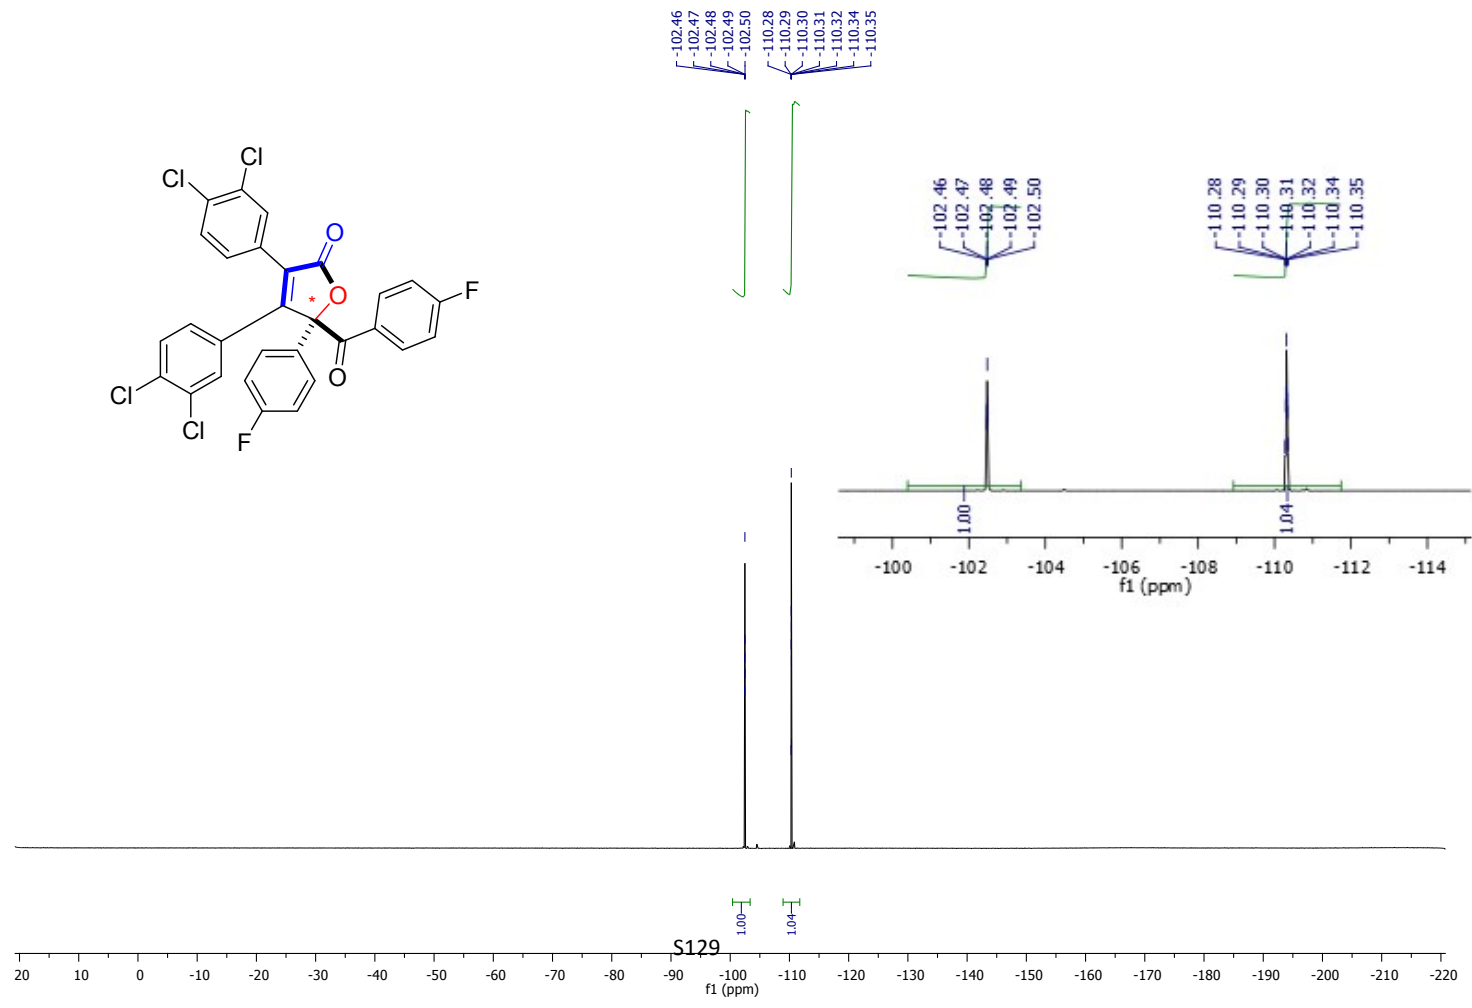

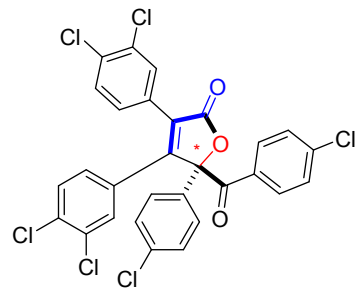

7.80  
7.78  
7.34  
7.19  
7.15  
7.11  
6.94  
6.77  
6.75

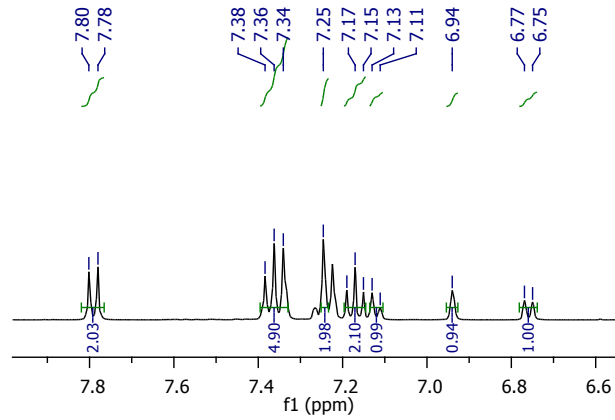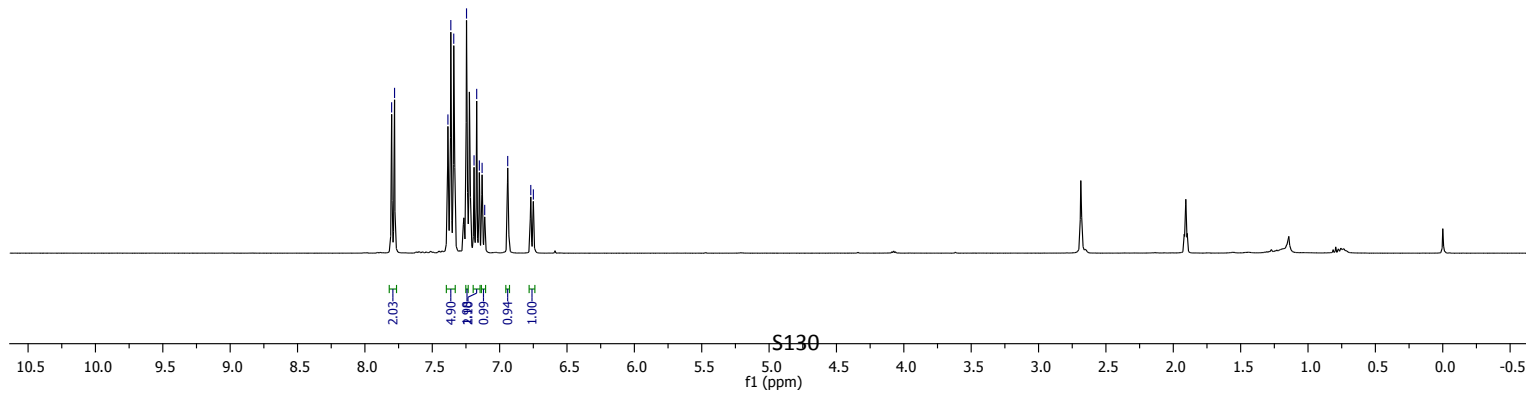

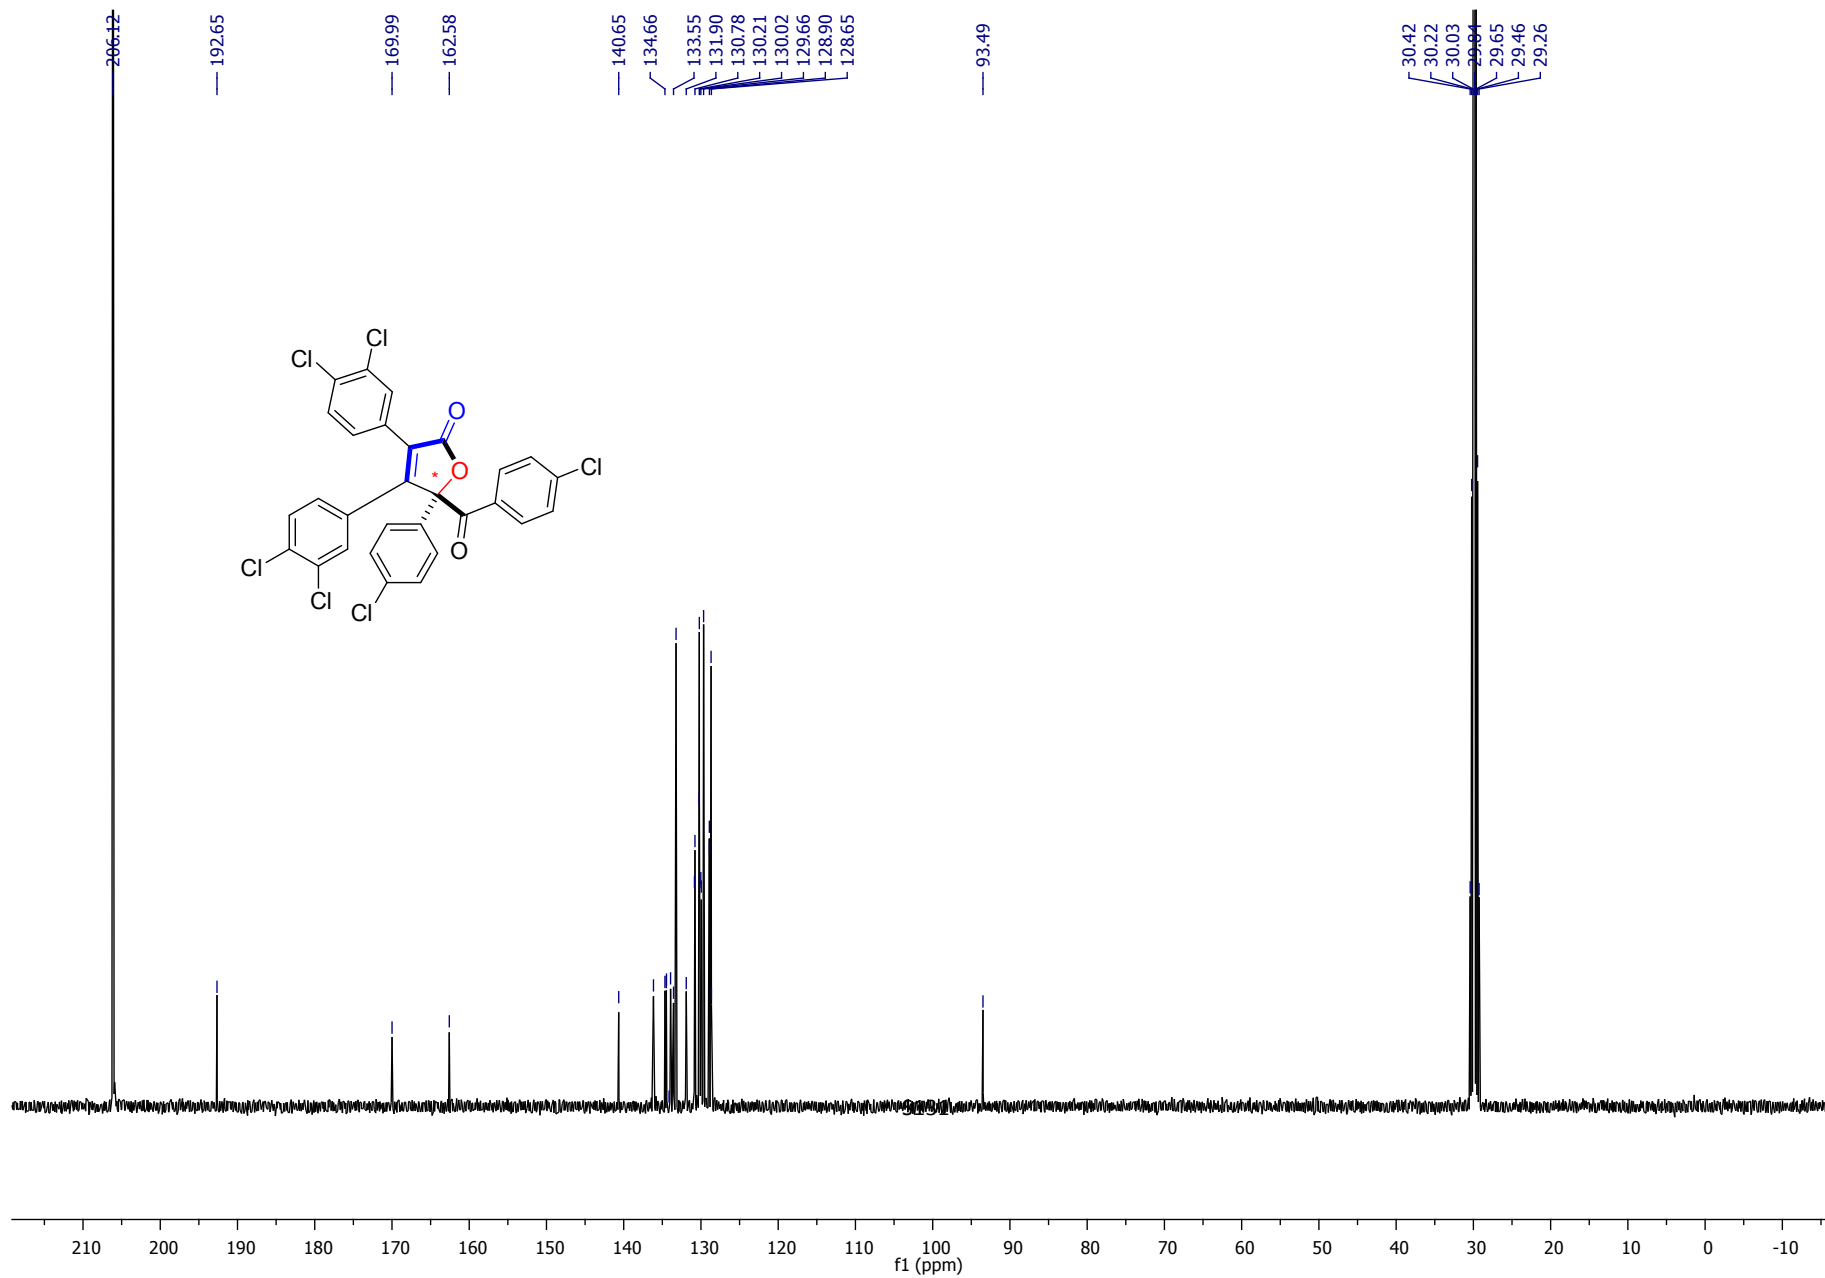

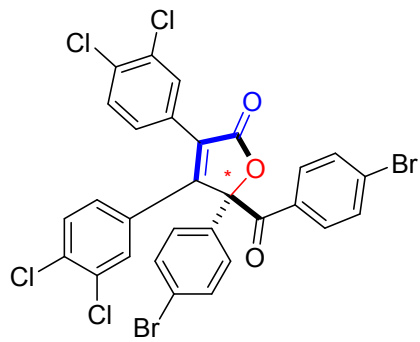

7.72  
7.70  
7.50  
7.20  
7.13  
6.94  
6.77  
6.75

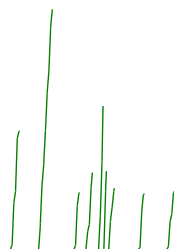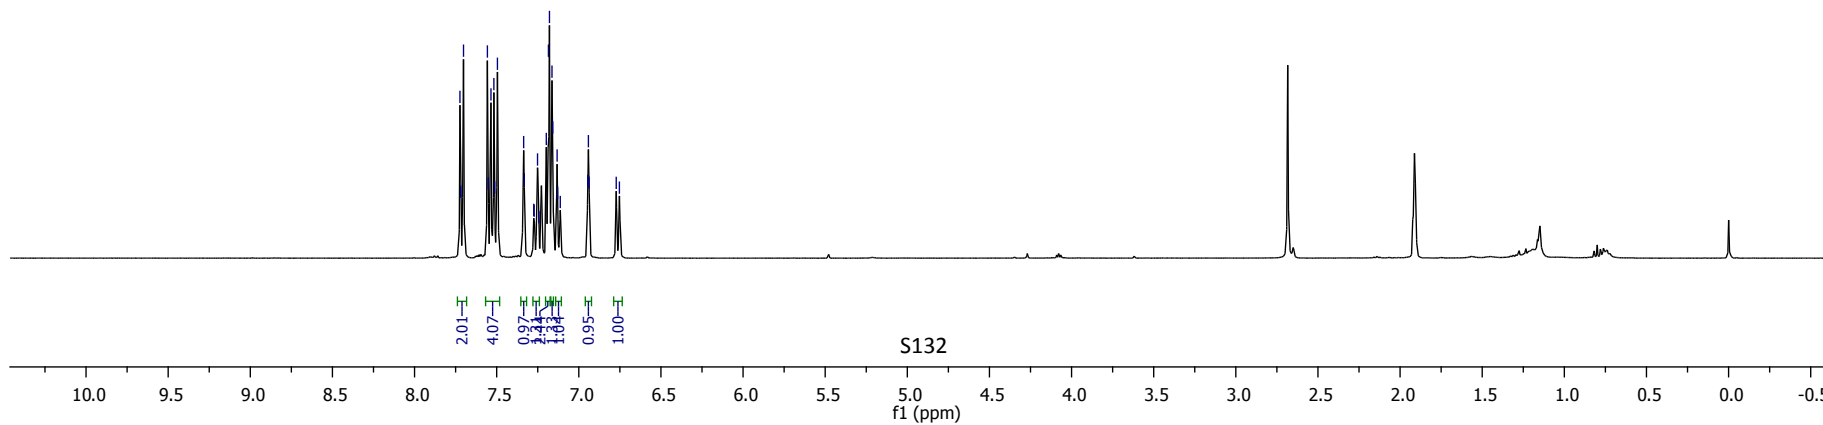

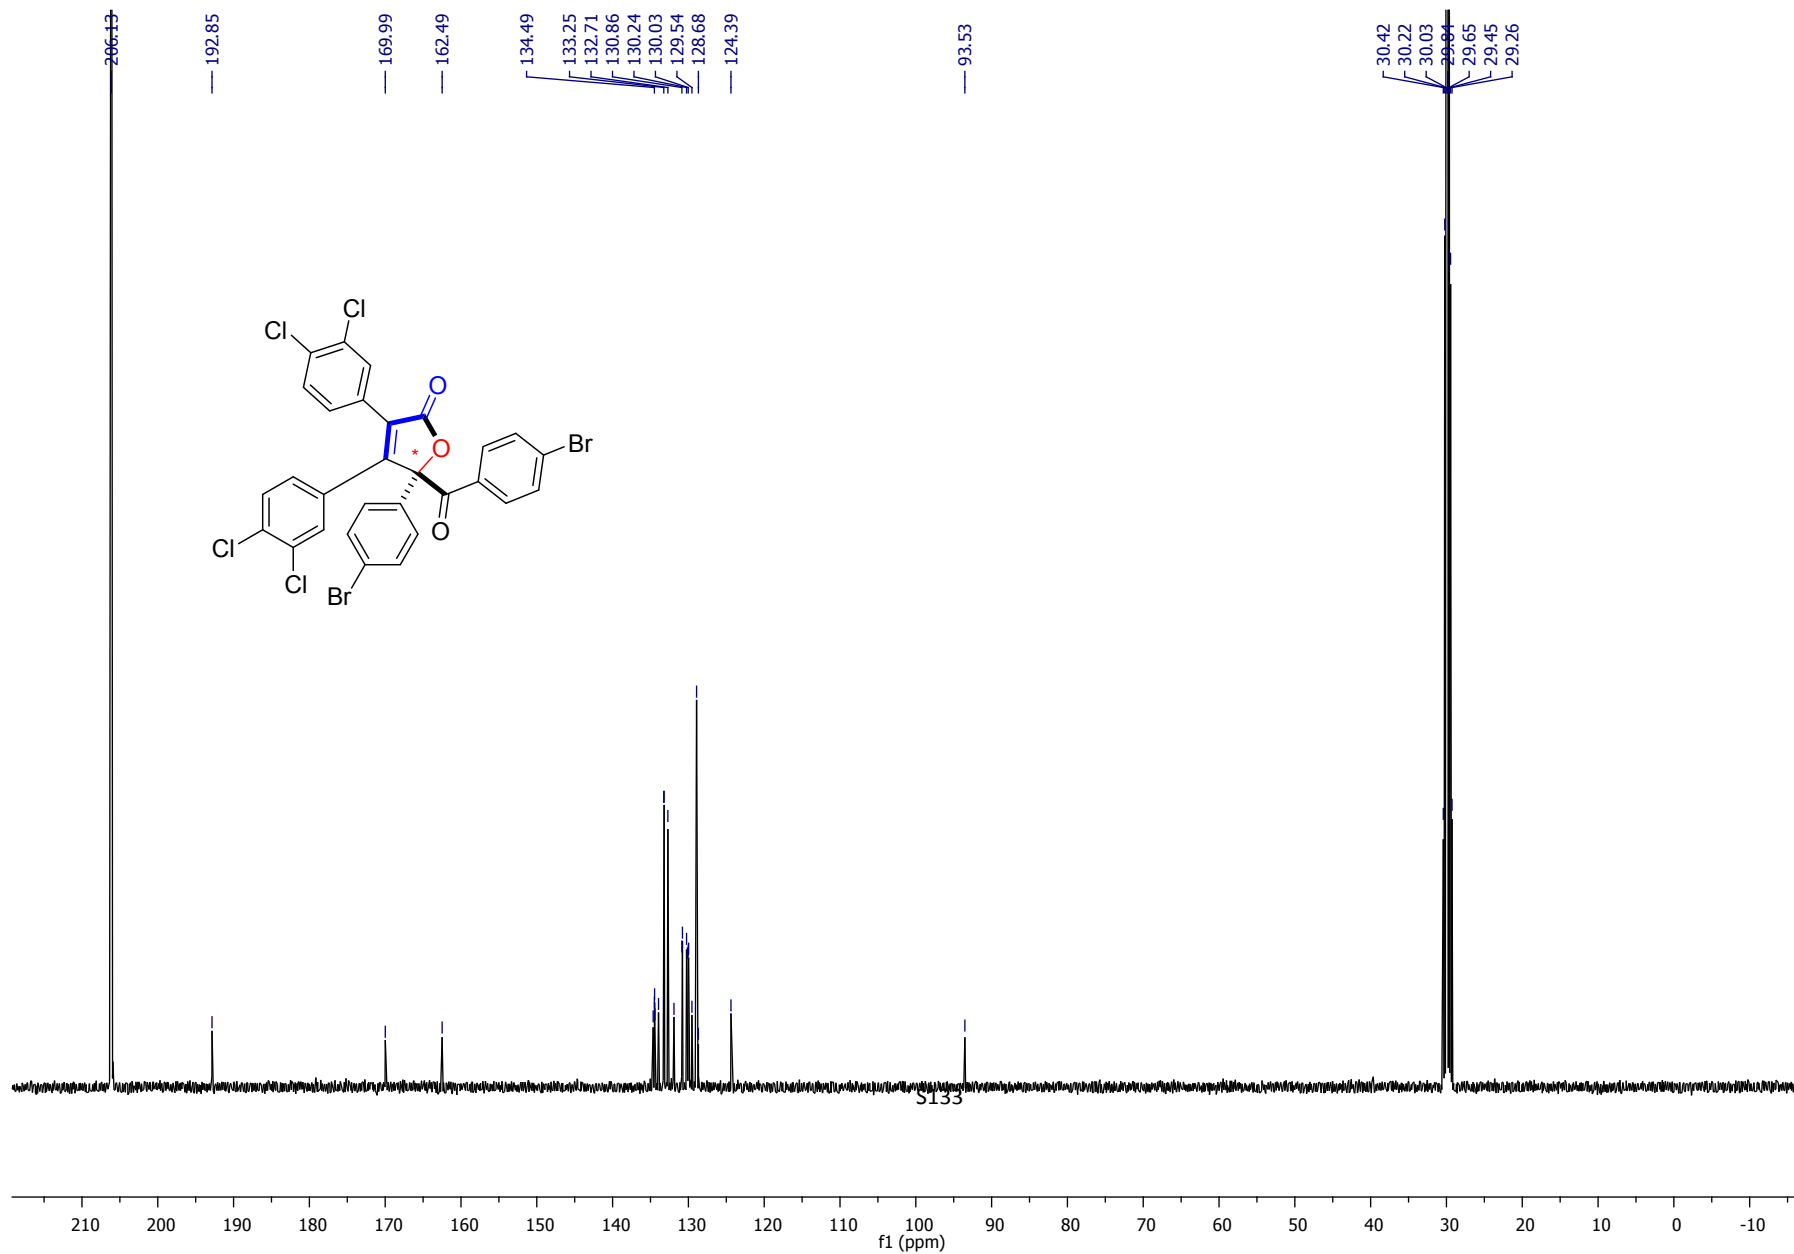

## 7. HPLC Spectra

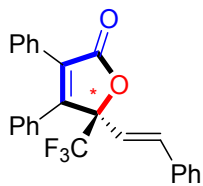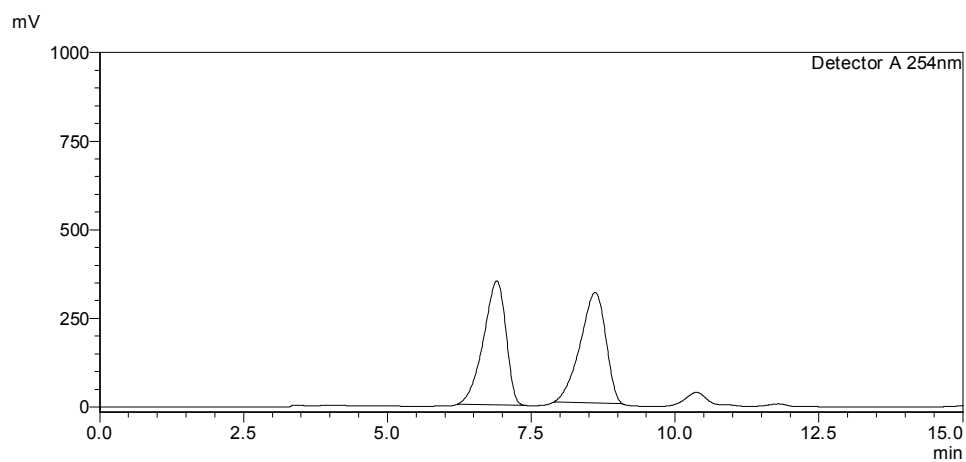

| Peak# | Ret. Time | Area    | Height | Conc.  |
|-------|-----------|---------|--------|--------|
| 1     | 6.900     | 9522529 | 349562 | 49.794 |
| 2     | 8.610     | 9601315 | 311032 | 50.206 |

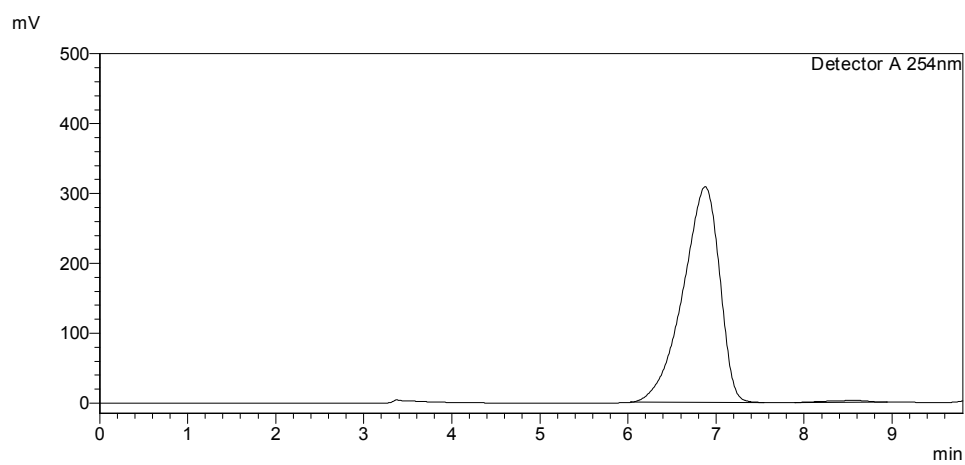

| Peak# | Ret. Time | Area    | Height | Conc.  |
|-------|-----------|---------|--------|--------|
| 1     | 6.876     | 8935670 | 308811 | 99.007 |
| 2     | 8.566     | 89627   | 2753   | 0.993  |

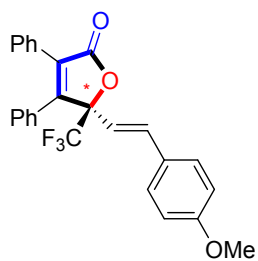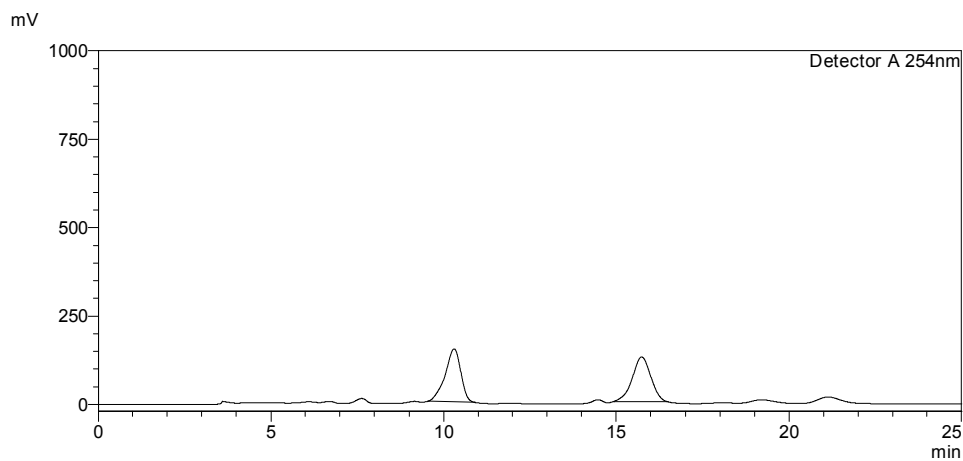

| Peak# | Ret. Time | Area    | Height | Conc.  |
|-------|-----------|---------|--------|--------|
| 1     | 10.307    | 4732520 | 150153 | 50.016 |
| 2     | 15.735    | 4729501 | 126467 | 49.984 |

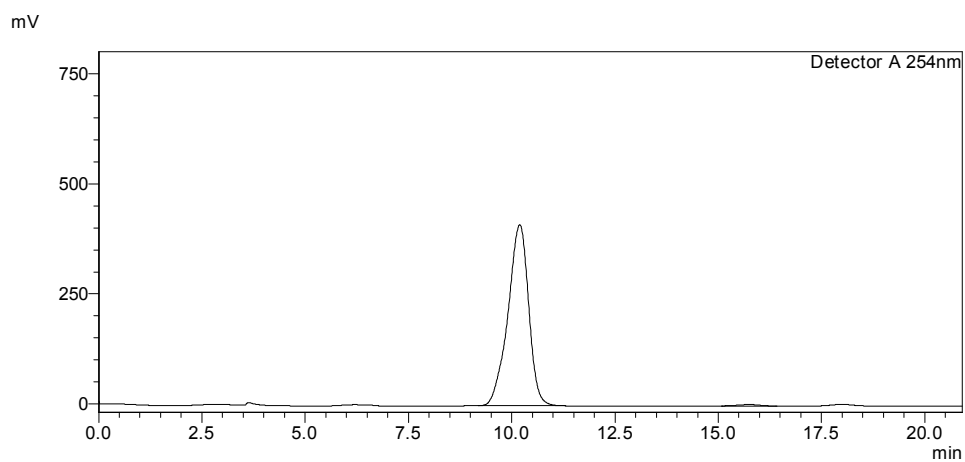

| Peak# | Ret. Time | Area     | Height | Conc.  |
|-------|-----------|----------|--------|--------|
| 1     | 10.193    | 14331406 | 411782 | 99.165 |
| 2     | 15.741    | 120707   | 3320   | 0.835  |

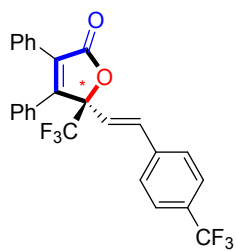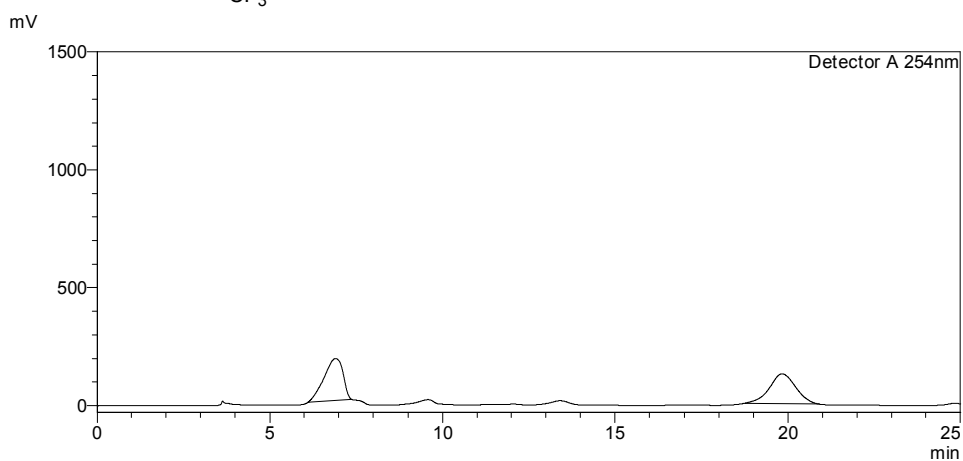

| Peak# | Ret. Time | Area    | Height | Conc.  |
|-------|-----------|---------|--------|--------|
| 1     | 6.911     | 6784433 | 177478 | 50.539 |
| 2     | 19.836    | 6639705 | 126240 | 49.461 |

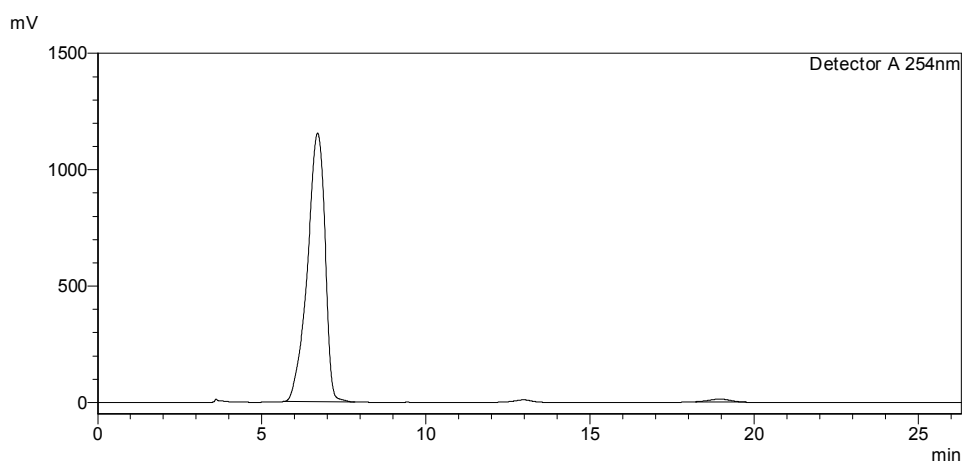

| Peak# | Ret. Time | Area     | Height  | Conc.  |
|-------|-----------|----------|---------|--------|
| 1     | 6.698     | 43172402 | 1156514 | 98.769 |
| 2     | 18.950    | 538134   | 12302   | 1.231  |



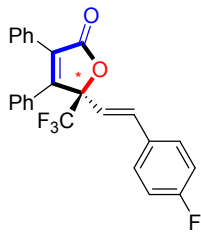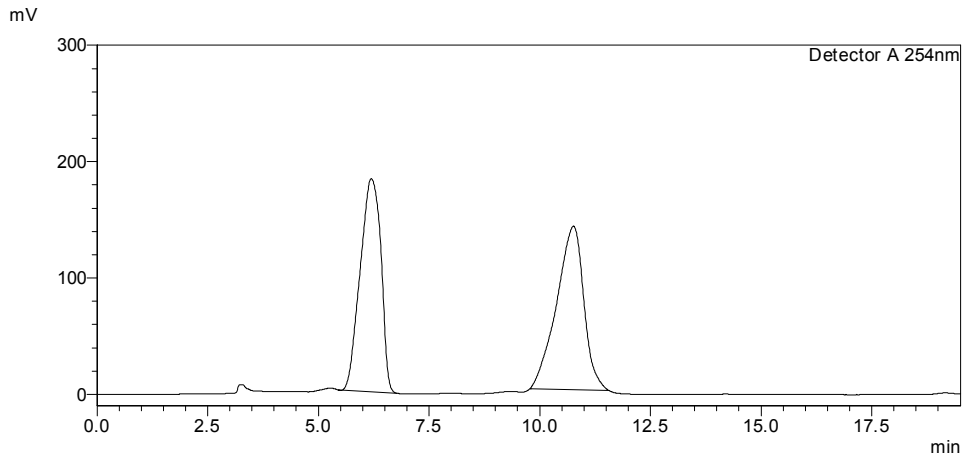

| Peak# | Ret. Time | Area    | Height | Conc.  |
|-------|-----------|---------|--------|--------|
| 1     | 6.196     | 5981045 | 183220 | 49.905 |
| 2     | 10.763    | 6003882 | 140425 | 50.095 |

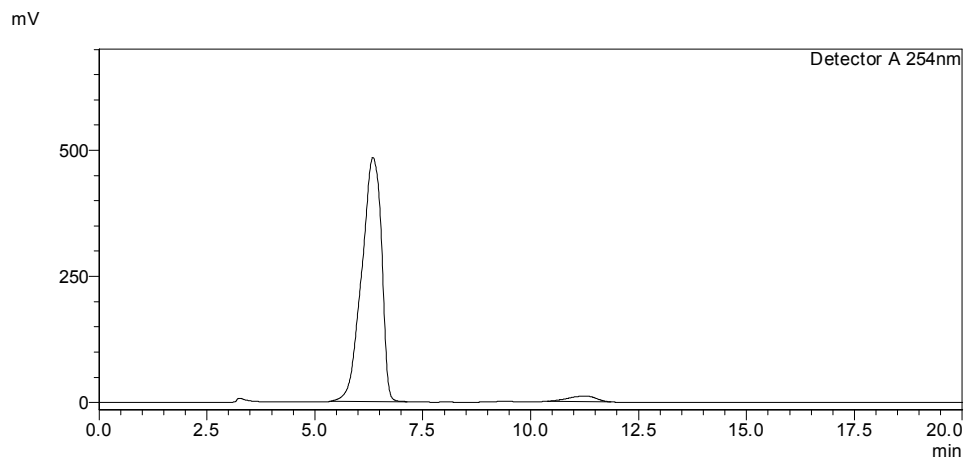

| Peak# | Ret. Time | Area     | Height | Conc.  |
|-------|-----------|----------|--------|--------|
| 1     | 6.346     | 15423529 | 483548 | 96.937 |
| 2     | 11.276    | 487324   | 10753  | 3.063  |

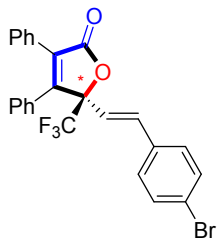

mV

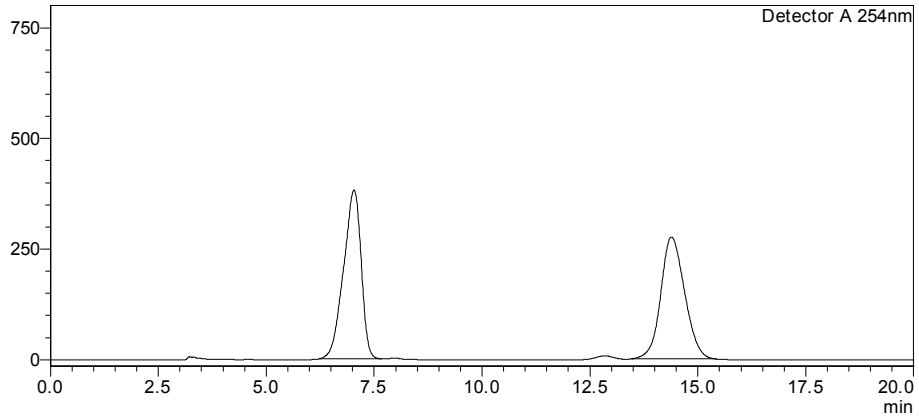

| Peak# | Ret. Time | Area     | Height | Conc.  |
|-------|-----------|----------|--------|--------|
| 1     | 7.032     | 10802978 | 381470 | 50.485 |
| 2     | 14.388    | 10595368 | 275466 | 49.515 |

mV

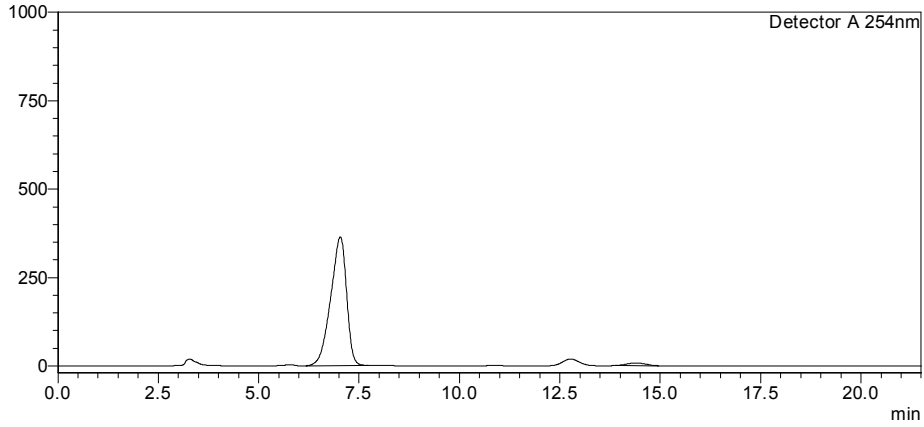

| Peak# | Ret. Time | Area    | Height | Conc.  |
|-------|-----------|---------|--------|--------|
| 1     | 7.032     | 9997595 | 364225 | 97.685 |
| 2     | 14.394    | 236955  | 7445   | 2.315  |

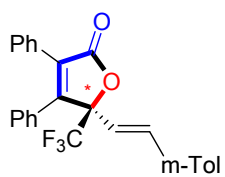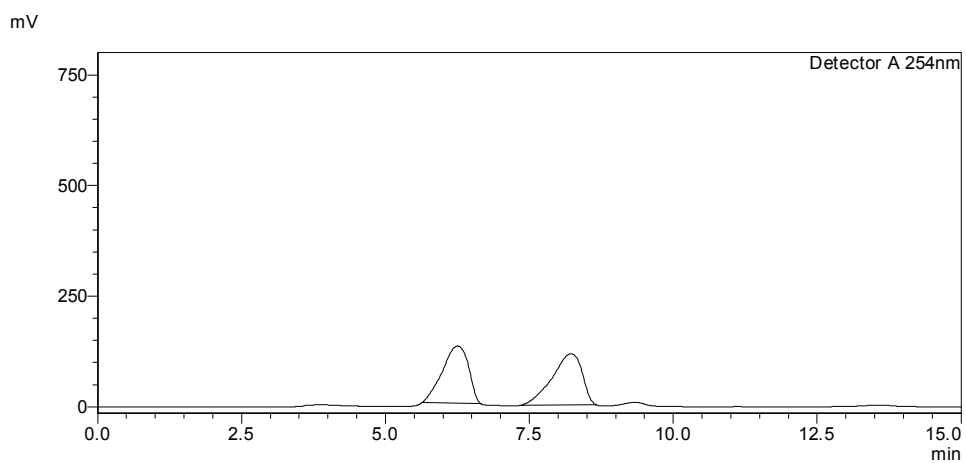

| Peak# | Ret. Time | Area    | Height | Conc.  |
|-------|-----------|---------|--------|--------|
| 1     | 6.254     | 4075777 | 128923 | 49.527 |
| 2     | 8.226     | 4153690 | 114946 | 50.473 |

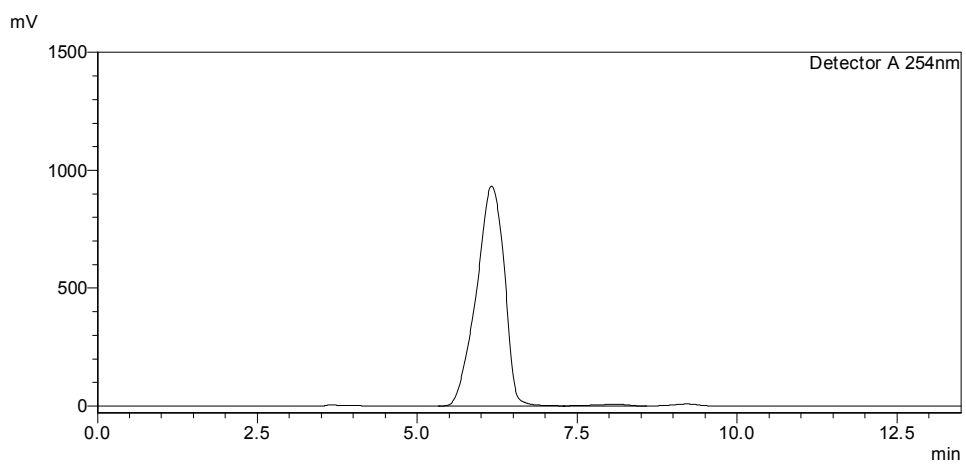

| Peak# | Ret. Time | Area     | Height | Conc.  |
|-------|-----------|----------|--------|--------|
| 1     | 6.162     | 28396599 | 932468 | 99.013 |
| 2     | 8.082     | 282992   | 7064   | 0.987  |

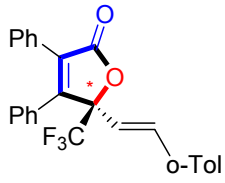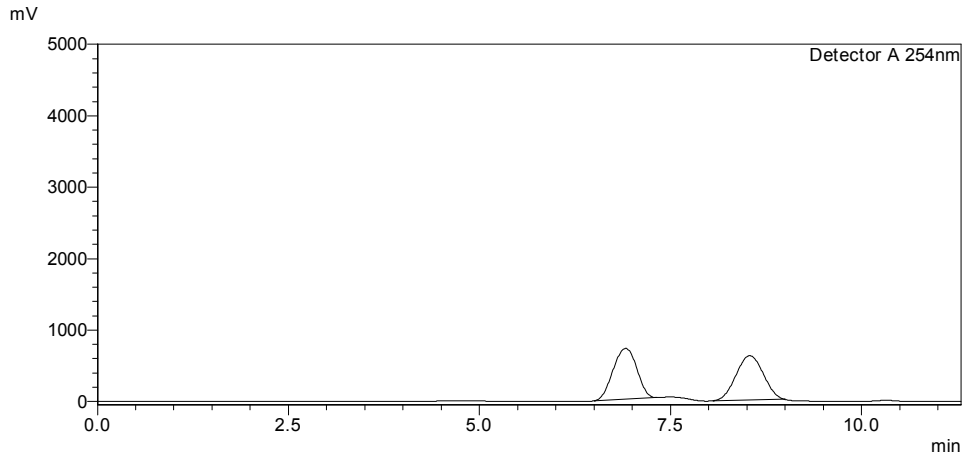

| Peak# | Ret. Time | Area     | Height | Conc.  |
|-------|-----------|----------|--------|--------|
| 1     | 6.914     | 15419302 | 712029 | 49.889 |
| 2     | 8.538     | 15487969 | 620756 | 50.111 |

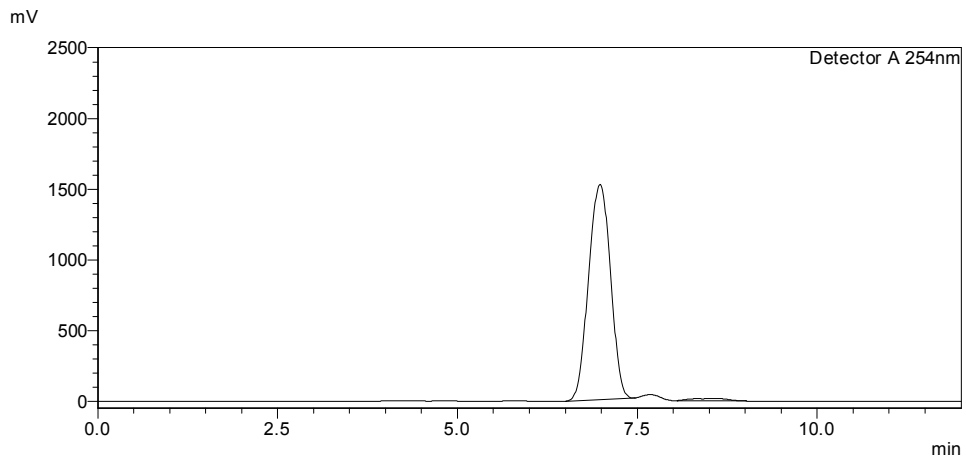

| Peak# | Ret. Time | Area     | Height  | Conc.  |
|-------|-----------|----------|---------|--------|
| 1     | 6.981     | 32292923 | 1520847 | 98.239 |
| 2     | 8.584     | 578841   | 17528   | 1.761  |

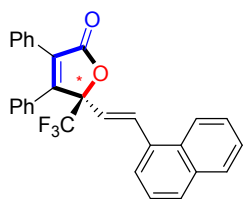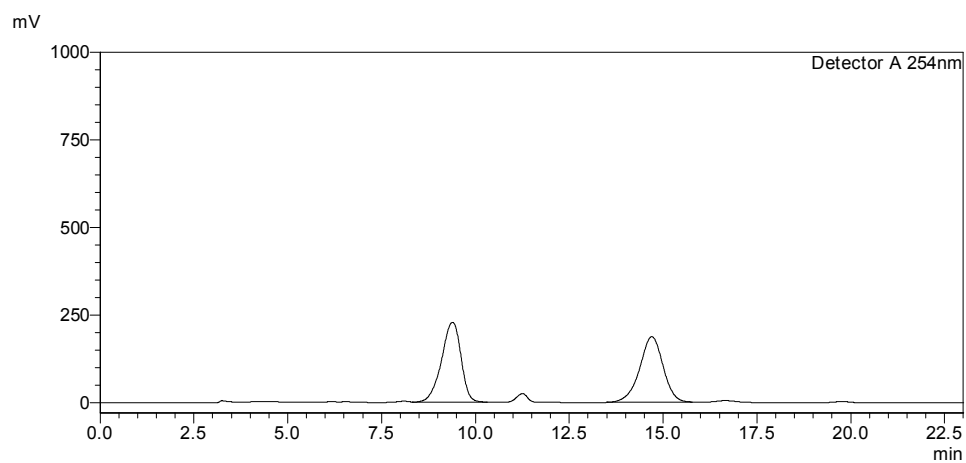

| Peak# | Ret. Time | Area    | Height | Conc.  |
|-------|-----------|---------|--------|--------|
| 1     | 9.390     | 8244066 | 228228 | 50.339 |
| 2     | 14.699    | 8133025 | 187241 | 49.661 |

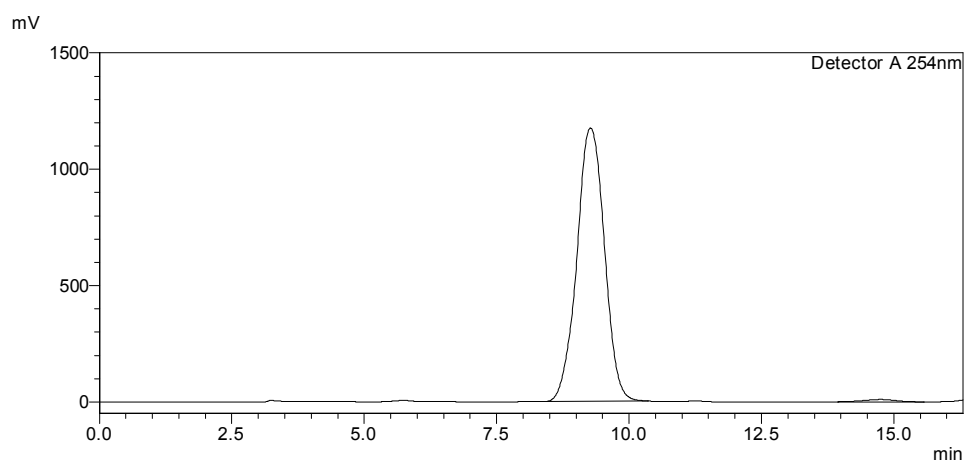

| Peak# | Ret. Time | Area     | Height  | Conc.  |
|-------|-----------|----------|---------|--------|
| 1     | 9.272     | 42514800 | 1174134 | 99.044 |
| 2     | 14.753    | 410358   | 10066   | 0.956  |

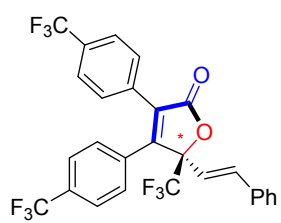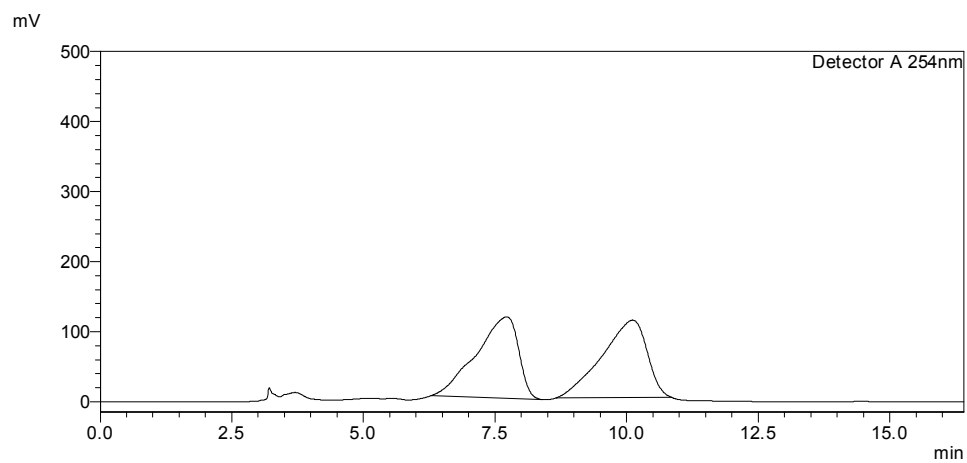

| Peak# | Ret. Time | Area    | Height | Conc.  |
|-------|-----------|---------|--------|--------|
| 1     | 7.720     | 6493127 | 116387 | 49.656 |
| 2     | 10.113    | 6583152 | 110540 | 50.344 |

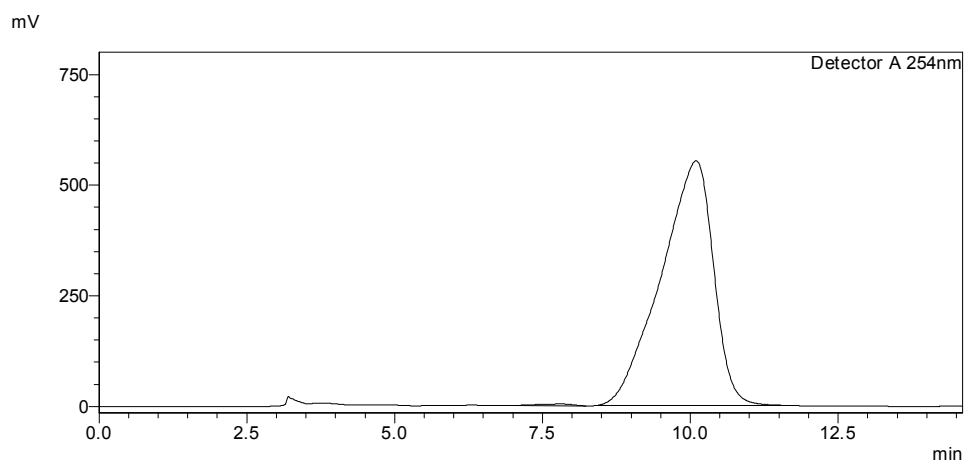

| Peak# | Ret. Time | Area     | Height | Conc.  |
|-------|-----------|----------|--------|--------|
| 1     | 7.816     | 158720   | 3845   | 0.463  |
| 2     | 10.097    | 34132817 | 553104 | 99.537 |

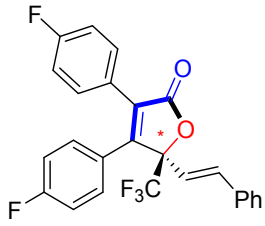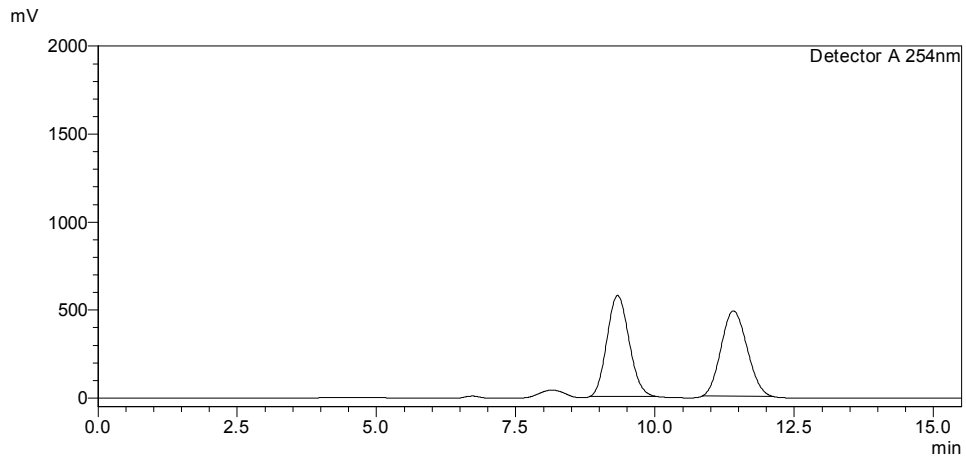

| Peak# | Ret. Time | Area     | Height | Conc.  |
|-------|-----------|----------|--------|--------|
| 1     | 9.328     | 15869993 | 573895 | 50.093 |
| 2     | 11.408    | 15811174 | 485662 | 49.907 |

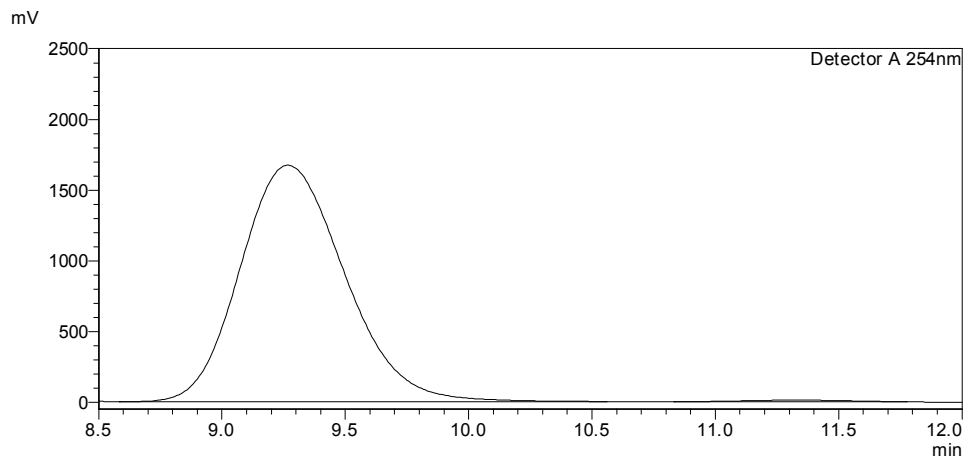

| Peak# | Ret. Time | Area     | Height  | Conc.  |
|-------|-----------|----------|---------|--------|
| 1     | 9.268     | 49221326 | 1671798 | 99.306 |
| 2     | 11.331    | 344001   | 11926   | 0.694  |



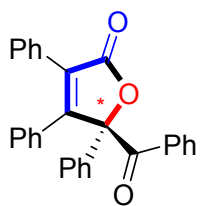

mV

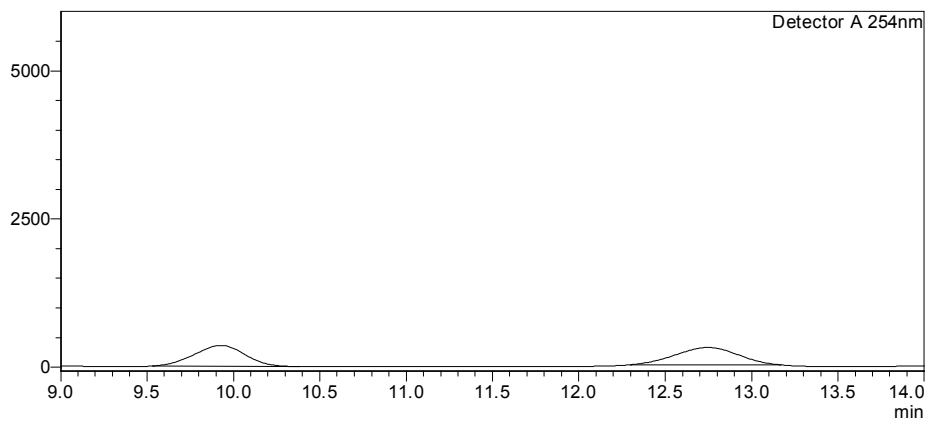

| Peak# | Ret. Time | Area    | Height | Conc.  |
|-------|-----------|---------|--------|--------|
| 1     | 9.929     | 7212760 | 352136 | 49.509 |
| 2     | 12.747    | 7355682 | 291955 | 50.491 |

mV

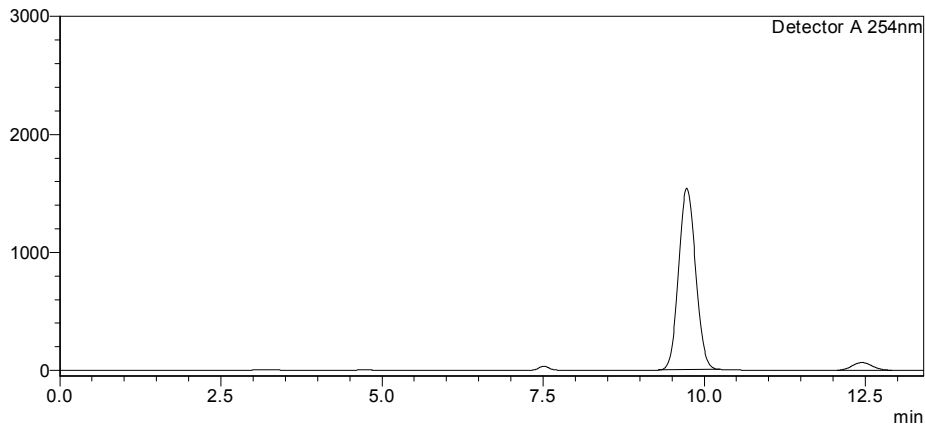

| Peak# | Ret. Time | Area     | Height  | Conc.  |
|-------|-----------|----------|---------|--------|
| 1     | 9.729     | 28286914 | 1536880 | 95.262 |
| 2     | 12.445    | 1406808  | 65295   | 4.738  |

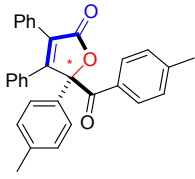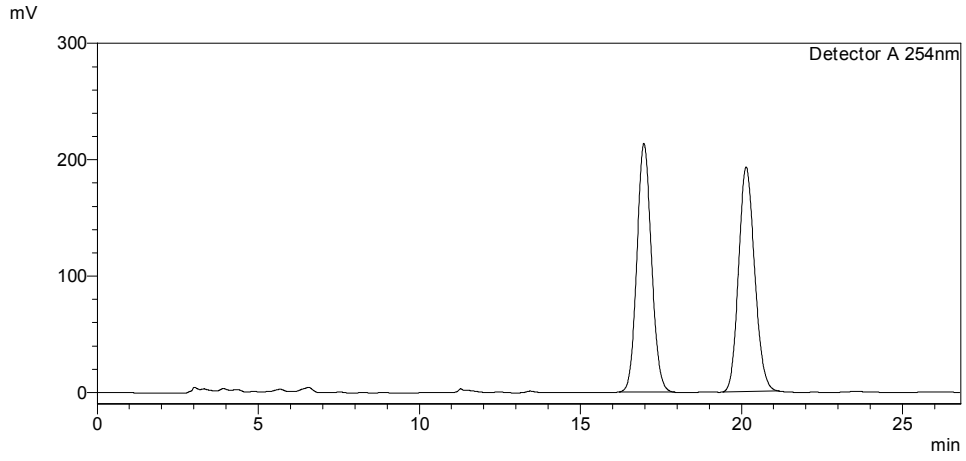

| Peak# | Ret. Time | Area    | Height | Conc.  |
|-------|-----------|---------|--------|--------|
| 1     | 16.971    | 6720650 | 213866 | 50.121 |
| 2     | 20.145    | 6688122 | 193089 | 49.879 |

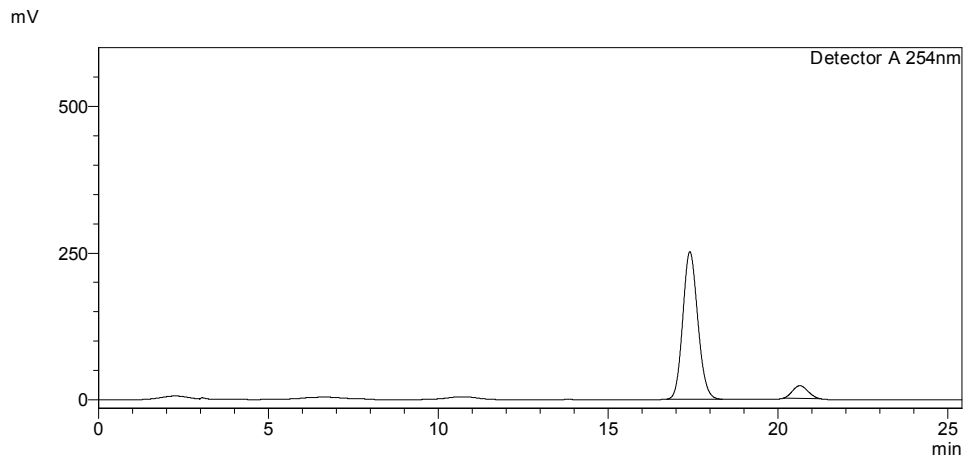

| Peak# | Ret. Time | Area    | Height | Conc.  |
|-------|-----------|---------|--------|--------|
| 1     | 17.402    | 7707763 | 251361 | 92.020 |
| 2     | 20.641    | 668455  | 21509  | 7.980  |

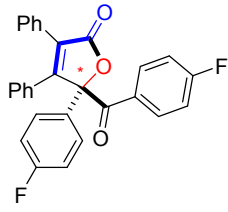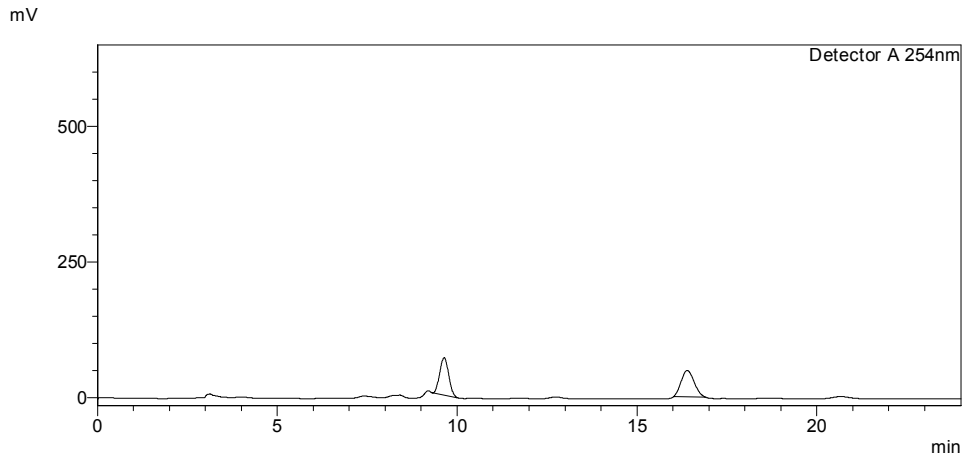

| Peak# | Ret. Time | Area    | Height | Conc.  |
|-------|-----------|---------|--------|--------|
| 1     | 9.639     | 1186960 | 68923  | 49.704 |
| 2     | 16.399    | 1201120 | 48207  | 50.296 |

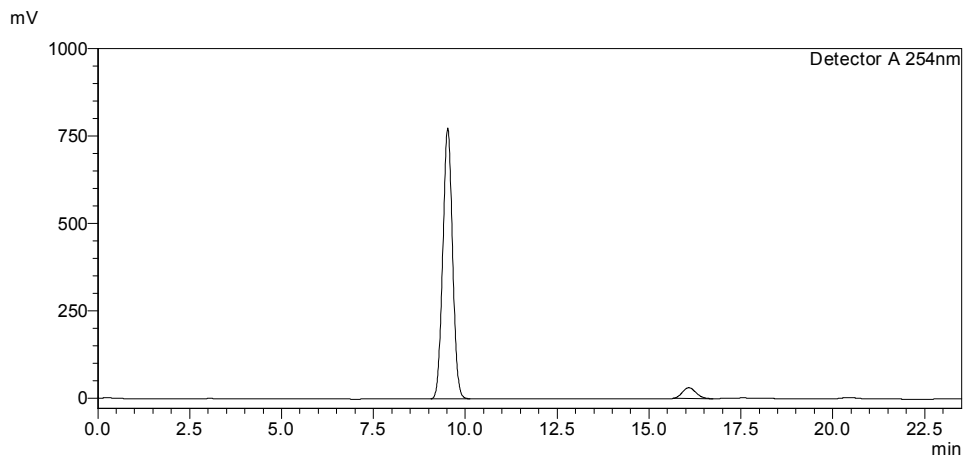

| Detector A 254nm |           |          |        |        |      |      |
|------------------|-----------|----------|--------|--------|------|------|
| Peak#            | Ret. Time | Area     | Height | Conc.  | Unit | Mark |
| 1                | 9.523     | 14270540 | 775049 | 94.760 |      | M    |
| 2                | 16.082    | 789135   | 30822  | 5.240  |      | M    |
| Total            |           | 15059675 | 805872 |        |      |      |

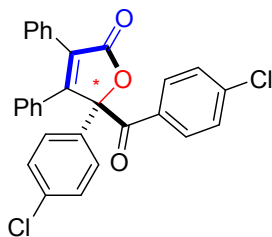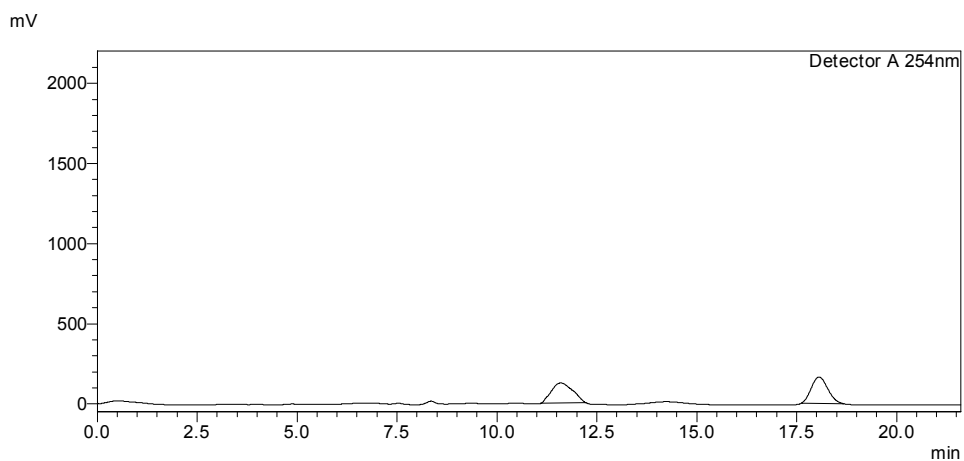

| Peak# | Ret. Time | Area    | Height | Conc.  |
|-------|-----------|---------|--------|--------|
| 1     | 11.596    | 4674351 | 125425 | 49.970 |
| 2     | 18.057    | 4680005 | 164363 | 50.030 |

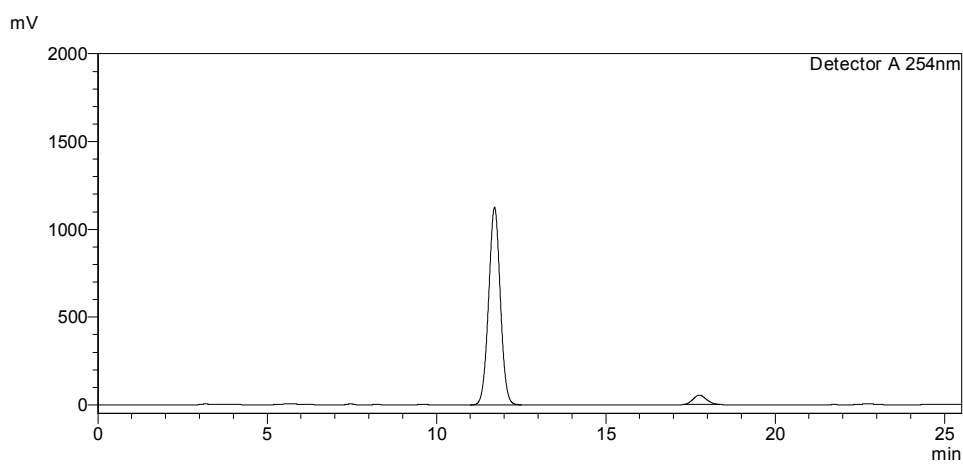

| Detector A 254nm |           |          |         |        |      |      |
|------------------|-----------|----------|---------|--------|------|------|
| Peak#            | Ret. Time | Area     | Height  | Conc.  | Unit | Mark |
| 1                | 11.714    | 26837512 | 1125450 | 94.914 |      | M    |
| 2                | 17.764    | 1438210  | 52621   | 5.086  |      | M    |
| Total            |           | 28275722 | 1178072 |        |      |      |

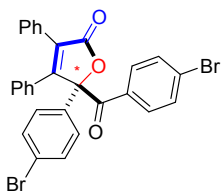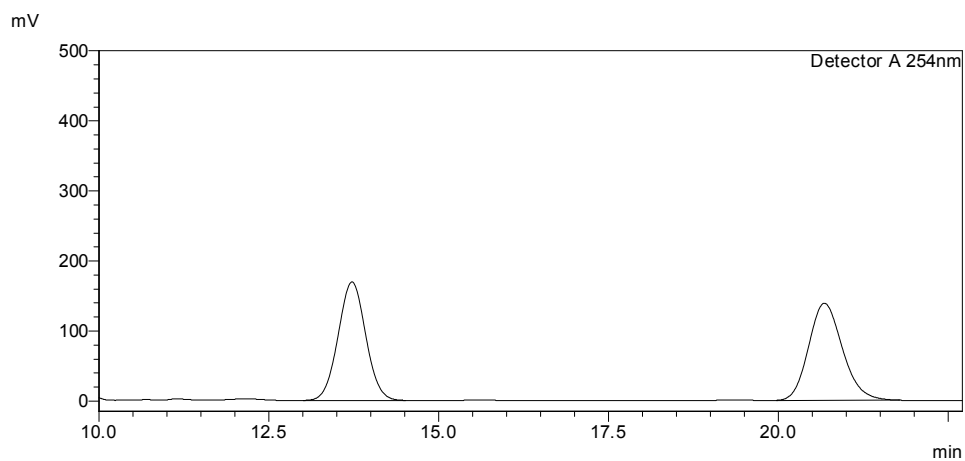

| Peak# | Ret. Time | Area    | Height | Conc.  |
|-------|-----------|---------|--------|--------|
| 1     | 13.723    | 4787077 | 169387 | 49.946 |
| 2     | 20.678    | 4797366 | 138584 | 50.054 |

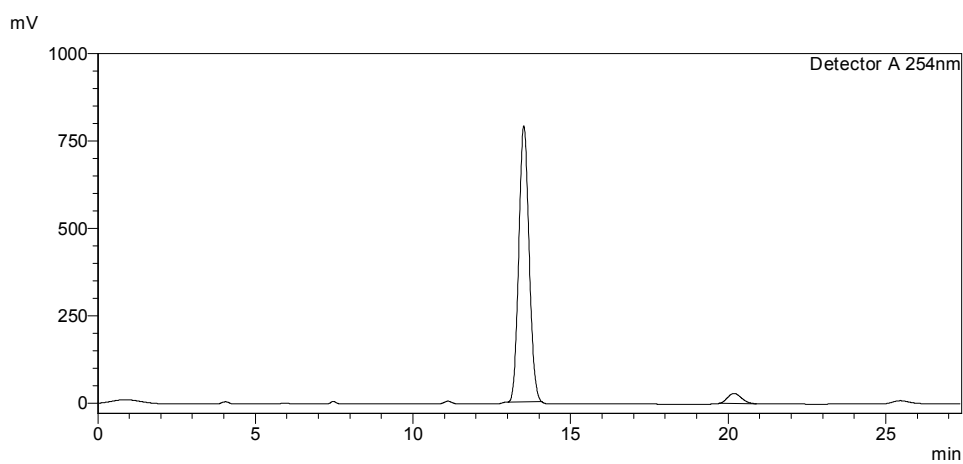

| Detector A 254nm |           |          |        |        |      |      |
|------------------|-----------|----------|--------|--------|------|------|
| Peak#            | Ret. Time | Area     | Height | Conc.  | Unit | Mark |
| 1                | 13.516    | 17977060 | 790493 | 95.270 |      | M    |
| 2                | 20.186    | 892525   | 29149  | 4.730  |      | M    |
| Total            |           | 18869584 | 819643 |        |      |      |

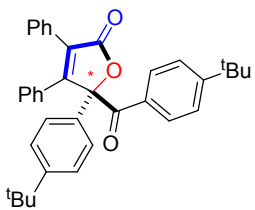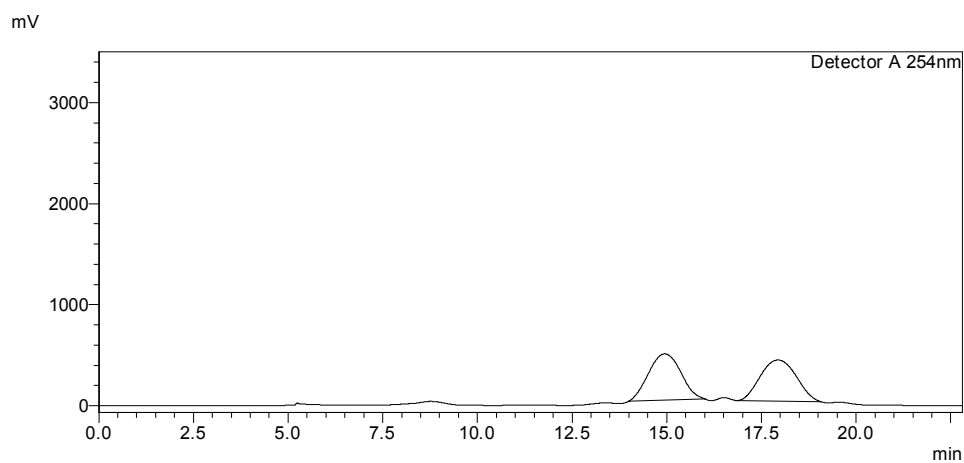

| Peak# | Ret. Time | Area     | Height | Conc.  |
|-------|-----------|----------|--------|--------|
| 1     | 14.947    | 27130130 | 457406 | 50.266 |
| 2     | 17.939    | 26842465 | 406457 | 49.734 |

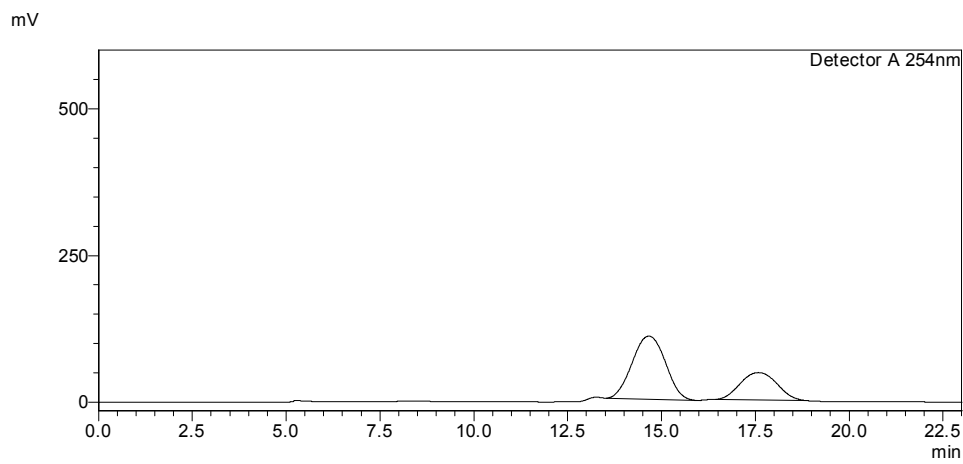

| Peak# | Ret. Time | Area    | Height | Conc.  |
|-------|-----------|---------|--------|--------|
| 1     | 14.661    | 6589817 | 107361 | 67.355 |
| 2     | 17.582    | 3193898 | 46813  | 32.645 |

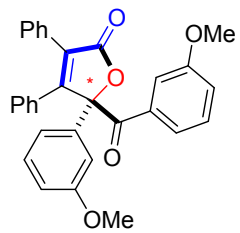

mV

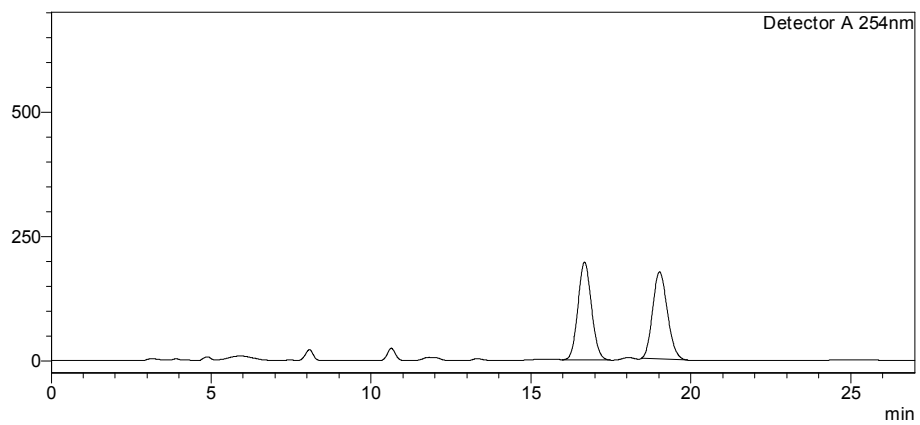

| Peak# | Ret. Time | Area    | Height | Conc.  |
|-------|-----------|---------|--------|--------|
| 1     | 16.676    | 5779667 | 196464 | 50.623 |
| 2     | 19.023    | 5637413 | 175319 | 49.377 |

mV

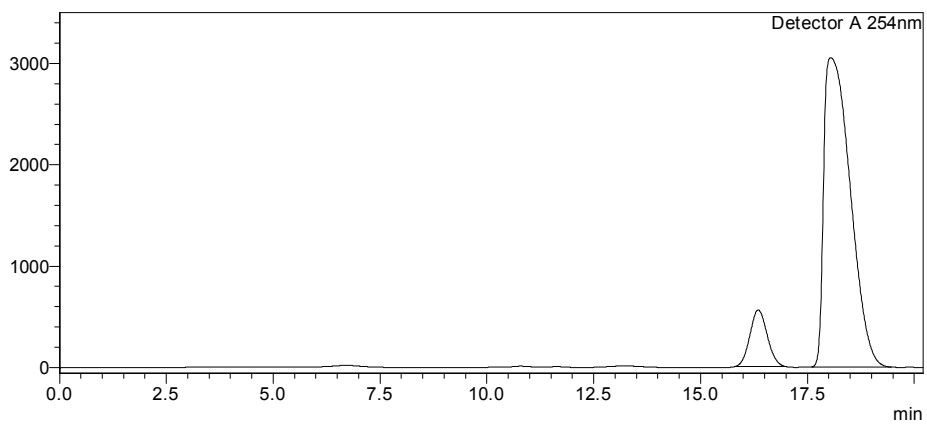

| Peak# | Ret. Time | Area      | Height  | Conc.  |
|-------|-----------|-----------|---------|--------|
| 1     | 16.348    | 15852791  | 561091  | 10.777 |
| 2     | 18.046    | 131245009 | 3052577 | 89.223 |

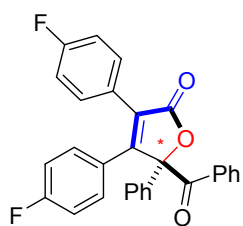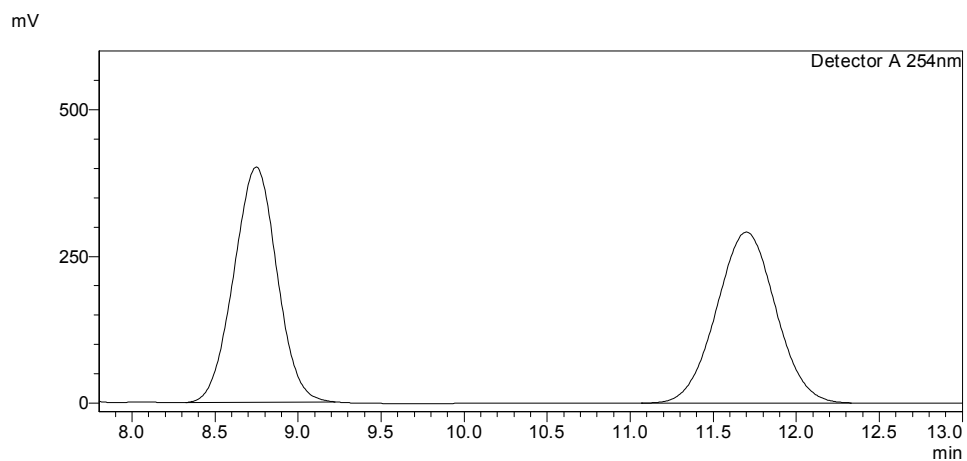

| Peak# | Ret. Time | Area    | Height | Conc.  |
|-------|-----------|---------|--------|--------|
| 1     | 8.747     | 7259272 | 400761 | 50.113 |
| 2     | 11.699    | 7226557 | 291514 | 49.887 |

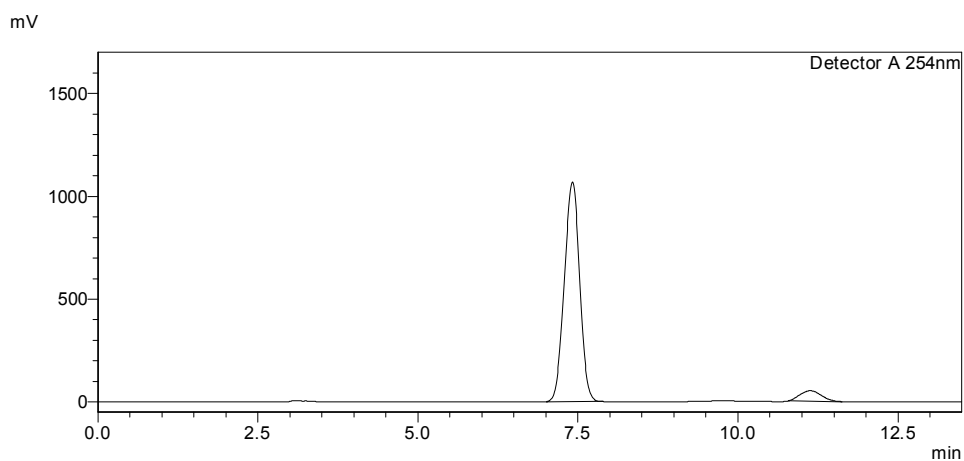

| Detector A 254nm |           |          |         |        |      |      |
|------------------|-----------|----------|---------|--------|------|------|
| Peak#            | Ret. Time | Area     | Height  | Conc.  | Unit | Mark |
| 1                | 7.415     | 17831904 | 1067511 | 93.738 |      | M    |
| 2                | 11.129    | 1191319  | 50922   | 6.262  |      | M    |
| Total            |           | 19023223 | 1118432 |        |      |      |



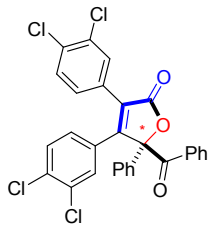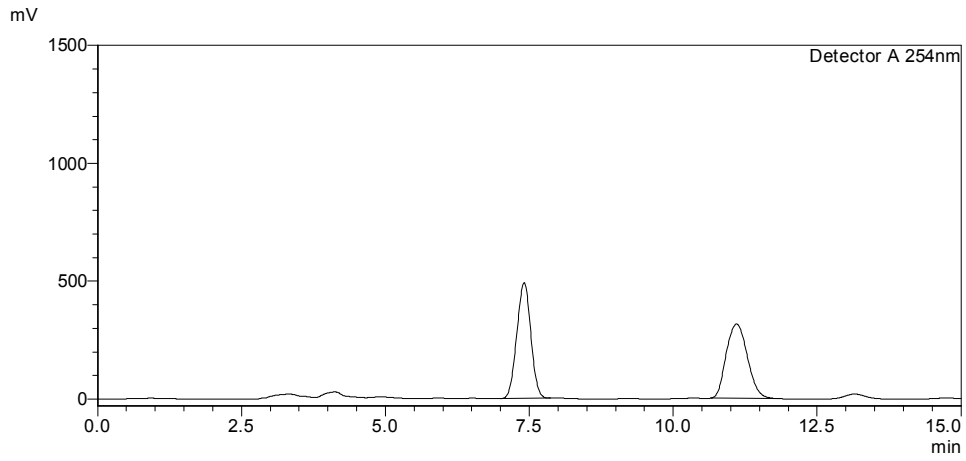

| Peak# | Ret. Time | Area    | Height | Conc.  |
|-------|-----------|---------|--------|--------|
| 1     | 7.412     | 8350398 | 491063 | 50.779 |
| 2     | 11.102    | 8094326 | 315217 | 49.221 |

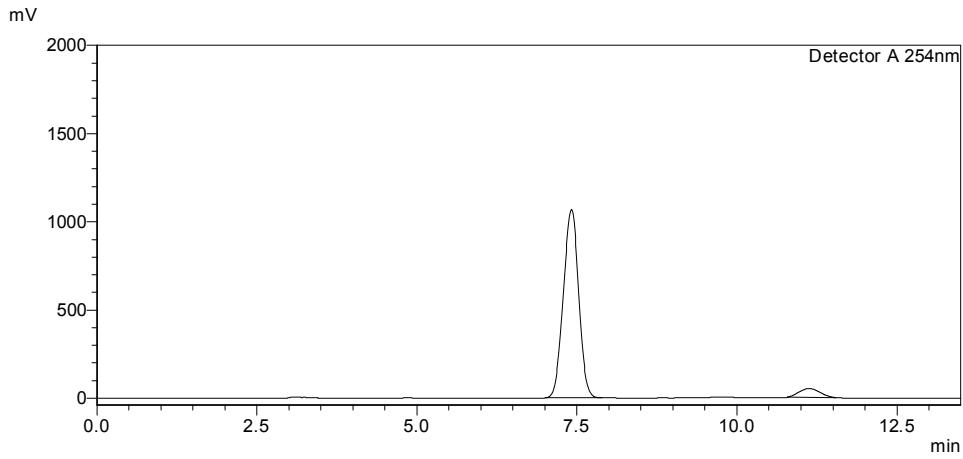

| Detector A 254nm |           |          |         |        |      |      |
|------------------|-----------|----------|---------|--------|------|------|
| Peak#            | Ret. Time | Area     | Height  | Conc.  | Unit | Mark |
| 1                | 7.415     | 17831904 | 1067511 | 93.966 |      | M    |
| 2                | 11.129    | 1145017  | 50037   | 6.034  |      | M    |
| Total            |           | 18976922 | 1117548 |        |      |      |

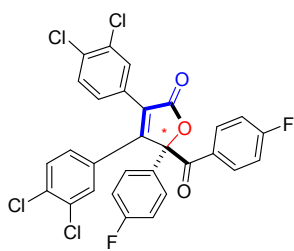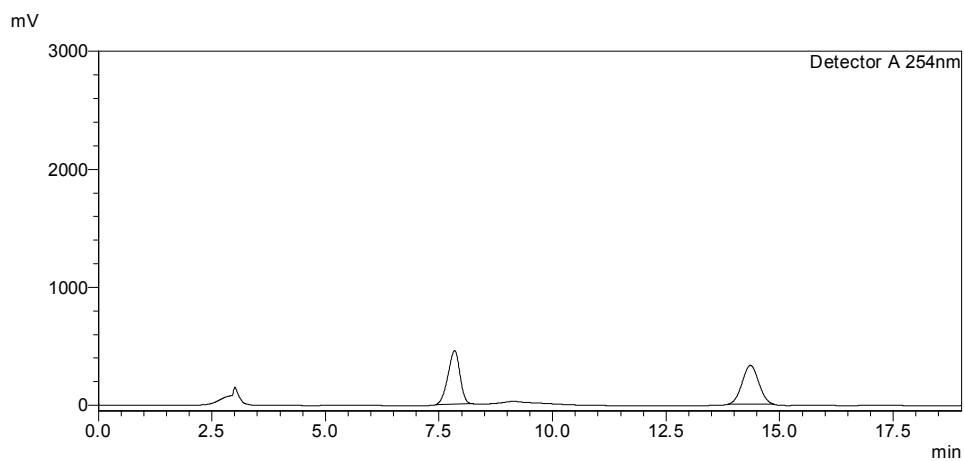

| Peak# | Ret. Time | Area    | Height | Conc.  |
|-------|-----------|---------|--------|--------|
| 1     | 7.841     | 8331288 | 454433 | 49.953 |
| 2     | 14.356    | 8347067 | 328835 | 50.047 |

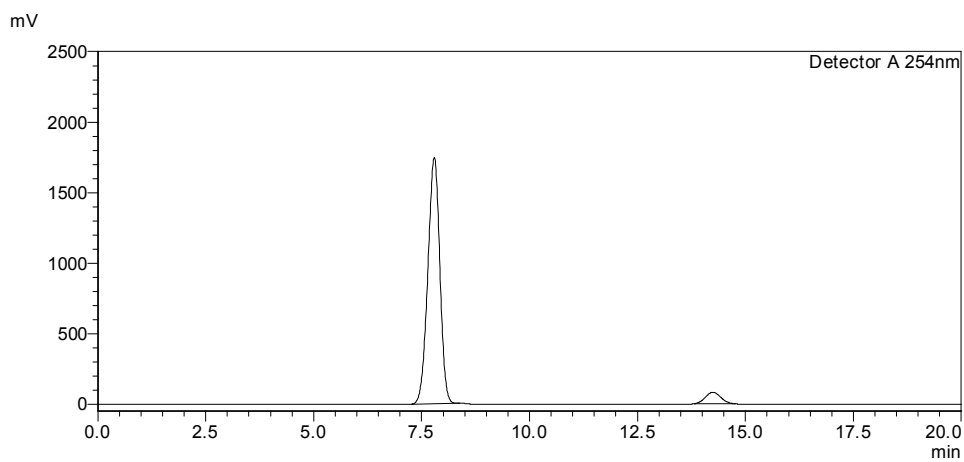

| Peak# | Ret. Time | Area     | Height  | Conc.  |
|-------|-----------|----------|---------|--------|
| 1     | 7.794     | 33598601 | 1745100 | 94.337 |
| 2     | 14.247    | 2016990  | 81415   | 5.663  |

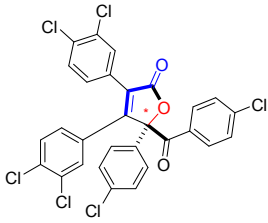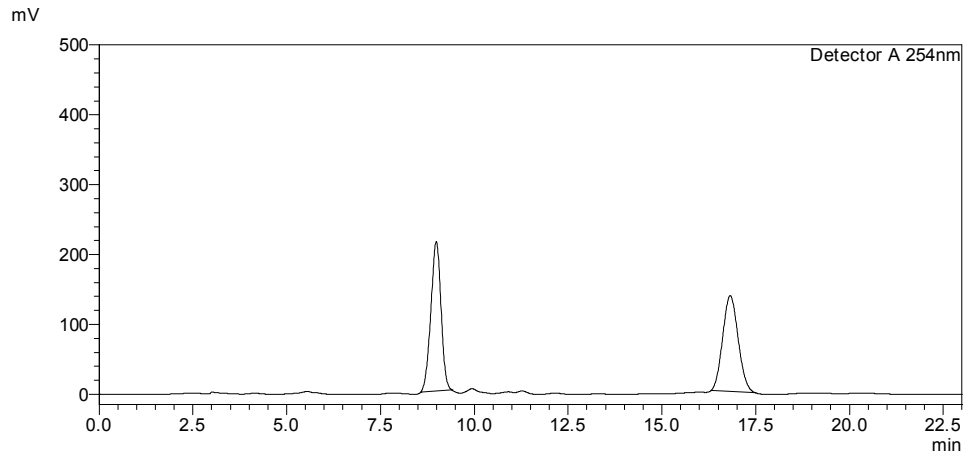

| Peak# | Ret. Time | Area    | Height | Conc.  |
|-------|-----------|---------|--------|--------|
| 1     | 8.987     | 4038164 | 213914 | 50.598 |
| 2     | 16.821    | 3942769 | 137214 | 49.402 |

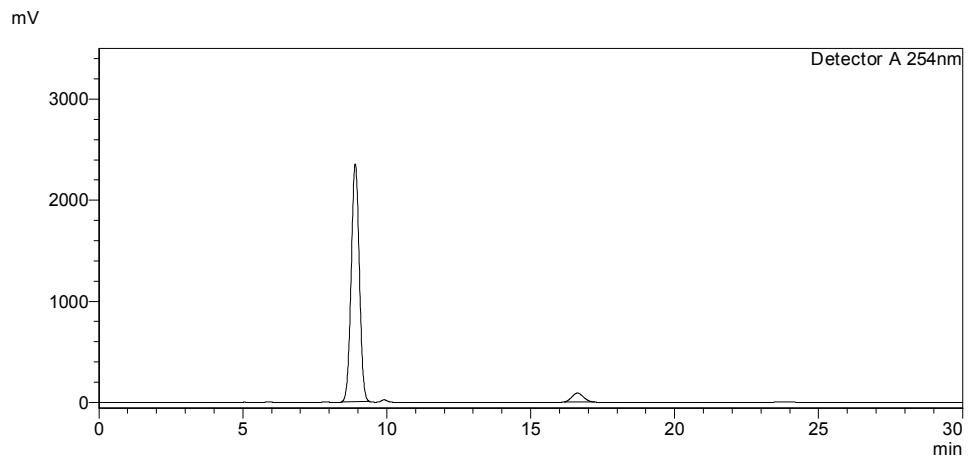

| Peak# | Ret. Time | Area     | Height  | Conc.  |
|-------|-----------|----------|---------|--------|
| 1     | 8.906     | 46308811 | 2355542 | 95.086 |
| 2     | 16.626    | 2392986  | 87050   | 4.914  |

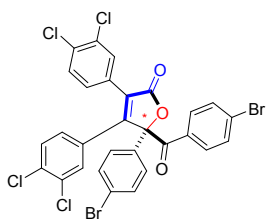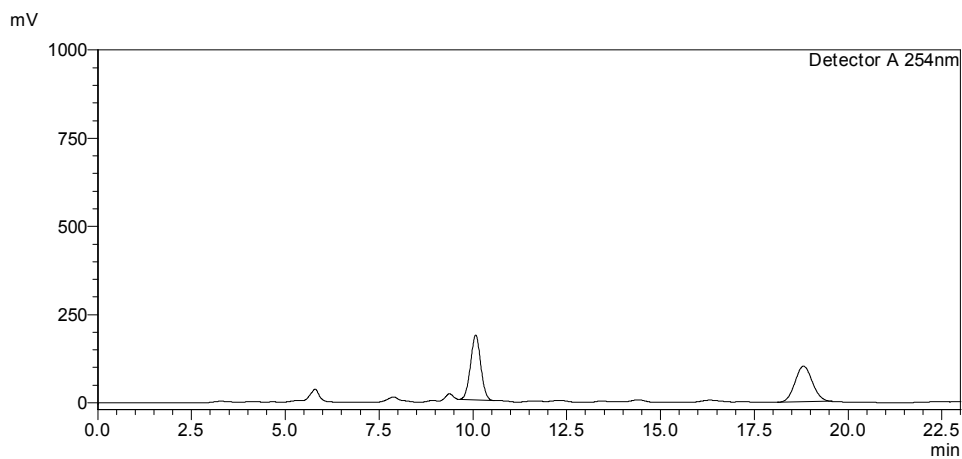

| Peak# | Ret. Time | Area    | Height | Conc.  |
|-------|-----------|---------|--------|--------|
| 1     | 10.075    | 3480814 | 184092 | 51.547 |
| 2     | 18.812    | 3271901 | 101241 | 48.453 |

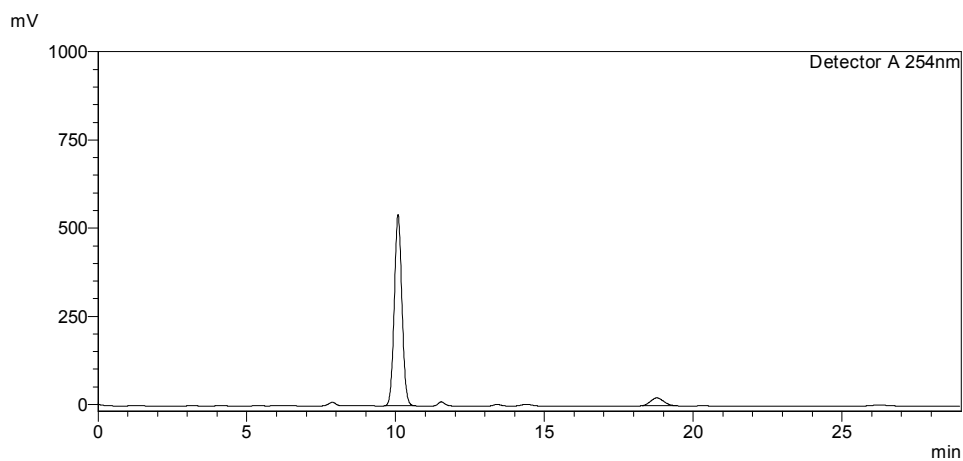

| Peak# | Ret. Time | Area    | Height | Conc.  |
|-------|-----------|---------|--------|--------|
| 1     | 10.083    | 9662481 | 542661 | 93.398 |
| 2     | 18.779    | 683055  | 22254  | 6.602  |
